# Supplementary material for: Transposons contribute to the functional diversification of the head, gut, and ovary transcriptomes across Drosophila natural strains
Source: HighWire-hosted journal article supplement (doi:10.1101/gr.277565.122), 2023-09-01
Supplement: Supplemental_Tables.zip [file Supplemental_Table_5.xlsx]

## Sheet: Sheet1
Table S5. Analysis of TE families. A. TE families detected across body parts. B. Contribution of DNA retrotransposons and retrotransposons in the five genomes. Data from Rech et al. (2022). C. Families detected by insertion group. D. TE family enrichment by strain compared to the genome. Only TE families with at least 20 copies in the genome have been considered. E. TE families distribution in ge…
A. TE families tected across body parts.
TE family	Body part
1731	Head
BS	Head
G6	Head
I-element	Head
NewFam14	Head
Transpac	Head
baggins	Head
gypsy1	Head
gypsy4	Head
gypsy7	Head
Copia-3_Dbp	Gut
Doc6	Gut
G4	Gut
Gypsy-4_Dsim	Gut
Rt1c	Gut
looper1	Gut
Copia2	Ovary
HMS-Beagle	Ovary
Stalker2	Ovary
Tabor	Ovary
17-6	Gut;Head
3S18	Gut;Head
BS2	Gut;Head
BS3	Gut;Head
Burdock	Gut;Head
NewFam16	Gut;Head
Tc1	Gut;Head
gypsy10	Gut;Head
BEL-4_Dfi	Head;Ovary
Doc4	Head;Ovary
F-element	Head;Ovary
Invader1	Head;Ovary
Max-element	Head;Ovary
Micropia	Head;Ovary
mariner2	Head;Ovary
transib4	Head;Ovary
Blastopia	Gut;Ovary
Invader2	Gut;Ovary
Tom1	Gut;Ovary
gypsy11	Gut;Ovary
gypsy6	Gut;Ovary
hopper	Gut;Ovary
rover	Gut;Ovary
transib1	Gut;Ovary
1360	Gut;Head;Ovary
297	Gut;Head;Ovary
412	Gut;Head;Ovary
Bari1	Gut;Head;Ovary
Copia	Gut;Head;Ovary
Cr1a	Gut;Head;Ovary
Doc	Gut;Head;Ovary
FB4	Gut;Head;Ovary
G5	Gut;Head;Ovary
G5A	Gut;Head;Ovary
Gypsy-1_Dsim	Gut;Head;Ovary
Gypsy-24_Dya	Gut;Head;Ovary
Gypsy-26_Dya	Gut;Head;Ovary
Gypsy-2_Dsim	Gut;Head;Ovary
Gypsy-6_Dse	Gut;Head;Ovary
H	Gut;Head;Ovary
HB	Gut;Head;Ovary
INE-1	Gut;Head;Ovary
Idefix	Gut;Head;Ovary
LARD	Gut;Head;Ovary
NOF	Gut;Head;Ovary
P-element	Gut;Head;Ovary
Quasimodo	Gut;Head;Ovary
Quasimodo2	Gut;Head;Ovary
R1A1-element	Gut;Head;Ovary
Rt1a	Gut;Head;Ovary
Rt1b	Gut;Head;Ovary
S-element	Gut;Head;Ovary
Stalker	Gut;Head;Ovary
Stalker4	Gut;Head;Ovary
TART-A	Gut;Head;Ovary
Tc1-2	Gut;Head;Ovary
Tc3	Gut;Head;Ovary
blood	Gut;Head;Ovary
diver	Gut;Head;Ovary
diver2	Gut;Head;Ovary
gypsy	Gut;Head;Ovary
gypsy12	Gut;Head;Ovary
gypsy2	Gut;Head;Ovary
gypsy8	Gut;Head;Ovary
hopper2	Gut;Head;Ovary
jockey	Gut;Head;Ovary
jockey2	Gut;Head;Ovary
mdg1	Gut;Head;Ovary
pogo	Gut;Head;Ovary
roo	Gut;Head;Ovary
Ninja	Not detected
Bari2	Not detected
frogger	Not detected
Fw3	Not detected
G7	Not detected
Helitron	Not detected
Invader5	Not detected
Penelope	Not detected
R1-2	Not detected
TART-B	Not detected
TART-C	Not detected
Dana-Tom	Not detected
Helena	Not detected
gypsy9	Not detected
Osvaldo	Not detected
R2-element	Not detected
transib3	Not detected
gypsy3	Not detected
Circe	Not detected
accord2	Not detected
rooA	Not detected
ZAM	Not detected
BS4	Not detected
Fw2	Not detected
G3	Not detected
Kepler	Not detected
gypsy5	Not detected
Invader6	Not detected
G-element	Not detected
gtwin	Not detected
Stalker3	Not detected
Doc5	Not detected
Doc2	Not detected
G2	Not detected
GATE	Not detected
Doc3	Not detected
HMS-Beagle2	Not detected
accord	Not detected
THARE	Not detected
Invader3	Not detected
Invader4	Not detected
Ivk	Not detected
transib2	Not detected
HeT-A	Not detected
mdg3	Not detected
Nomad	Not detected
Tirant	Not detected
NewFam06	Not detected
Chimpo	Not detected
Copia1	Not detected
Mariner_CA	Not detected
Copia-1_Dse	Not detected
Gypsy-24_DY	Not detected
Gypsy-35_Del	Not detected
gypsy6A	Not detected
Pifo	Not detected
B. Contribution of DNA transposons and retrotransposons in the five genomes. Data from Rech et al. (2022).
Class	Order	SuperFamily	AKA-017	JUT-011	MUN-016	SLA-001	TOM-007	Average
DNA	Helitron	INE-1	474	467	445	483	482
DNA	MITE	NewFam	6	7	7	6	6
DNA	TIR	CMC-Transib	32	38	31	38	43
DNA	TIR	hAT-hobo	68	65	57	51	44
DNA	TIR	MULE-NOF	9	15	14	18	12
DNA	TIR	NewFam	19	16	13	15	15
DNA	TIR	P	63	61	68	55	71
DNA	TIR	PiggyBac	1	1	1	1	1
DNA	TIR	TcMar-Pogo	30	31	34	27	33
DNA	TIR	TcMar-Tc1	81	83	91	71	79
RNA	LARD	LARD	346	344	350	345	352
RNA	LINE	CR1	7	7	7	10	7
RNA	LINE	I	28	28	27	32	33
RNA	LINE	Jockey	217	225	197	213	235
RNA	LINE	Loa	1	1	1	1	1
RNA	LINE	R1	53	51	53	70	61
RNA	LINE	R2	1	NA	2	1	3
RNA	LTR	Copia	36	37	28	41	41
RNA	LTR	Gypsy	347	340	295	335	363
RNA	LTR	Pao	115	115	120	98	108
RNA	TRIM	Gypsy	49	40	6	13	36
RNA	TRIM	NewFam	3	3	4	3	4
DNA			783	784	761	765	786	775.8
RNA			1203	1191	1090	1162	1244	1178
TOTAL			1986	1975	1851	1927	2030	1953.8		χ2 test
DNA			0.39426	0.396962	0.411129	0.39699	0.387192	0.397072		Comparison	Proportion 1	Proportion 2	P-value
RNA			0.60574	0.603038	0.588871	0.60301	0.612808	0.602928		Retrotransposons in chimerics vs genome	0.777778	0.602928	0.1397
C. Families detected by insertion group.			χ2 test.
Insertion group	Number of TE families		Comparison	Proportion 1	Proportion 2	P-value
Overlap and AS insertions	75		Overlap and AS insertions vs internal insertions	0.833333	0.755556	0.7452
Internal insertions	68
D. TE family enrichment by strain. Only TE families with at least 20 copies in the genome have been considered.
TE family	Assembly	χ2 test p-value	% chimeric transcripts	% genome strain	# copies genome	Result
1360	AKA-017	0.0783887	0.031401	0.0166163	33	Not significant
Doc	AKA-017	0.175986	0.00241546	0.0110775	22	Not significant
FB4	AKA-017	0.470047	0.00483092	0.0100705	20	Not significant
I-element	AKA-017	0.156349	0.00241546	0.0115811	23	Not significant
INE-1	AKA-017	0.307312	0.270531	0.238671	474	Not significant
jockey	AKA-017	0.00627776	0.00483092	0.0302115	60	Under-represented in chimeric transcripts
LARD	AKA-017	5.23108e-13	0.0193237	0.17422	346	Under-represented in chimeric transcripts
P-element	AKA-017	0.161139	0.00483092	0.0151057	30	Not significant
pogo	AKA-017	0.161139	0.00483092	0.0151057	30	Not significant
roo	AKA-017	2.50065e-88	0.471014	0.041289	82	Over-represented in chimeric transcripts
S-element	AKA-017	0.0775112	0.00241546	0.0146022	29	Not significant
1360	JUT-011	0.0976424	0.0296804	0.0162025	32	Not significant
297	JUT-011	0.423299	0.00913242	0.0156962	31	Not significant
412	JUT-011	0.781825	0.00913242	0.0121519	24	Not significant
BS	JUT-011	0.091343	0.00228311	0.0131646	26	Not significant
Copia	JUT-011	0.170405	0.00228311	0.0106329	21	Not significant
FB4	JUT-011	0.170405	0.00228311	0.0106329	21	Not significant
INE-1	JUT-011	0.639641	0.251142	0.236456	467	Not significant
jockey	JUT-011	0.00522523	0.00684932	0.0334177	66	Under-represented in chimeric transcripts
LARD	JUT-011	3.63118e-15	0.0114155	0.174177	344	Under-represented in chimeric transcripts
mdg1	JUT-011	0.170405	0.00228311	0.0106329	21	Not significant
P-element	JUT-011	0.0631309	0.00228311	0.0146835	29	Not significant
pogo	JUT-011	0.423299	0.00913242	0.0156962	31	Not significant
roo	JUT-011	1.04696e-85	0.46347	0.0435443	86	Over-represented in chimeric transcripts
Rt1b	JUT-011	0.150295	0.00228311	0.0111392	22	Not significant
S-element	JUT-011	0.677292	0.0182648	0.0141772	28	Not significant
1360	MUN-016	0.0175768	0.0363636	0.017288	32	Over-represented in chimeric transcripts
297	MUN-016	0.710109	0.00808081	0.0113452	21	Not significant
Doc	MUN-016	0.154166	0.0040404	0.012966	24	Not significant
FB4	MUN-016	0.0566623	0.0020202	0.0135062	25	Not significant
H	MUN-016	0.000595295	0.0020202	0.0307942	57	Under-represented in chimeric transcripts
I-element	MUN-016	0.102436	0.0020202	0.0113452	21	Not significant
INE-1	MUN-016	0.112571	0.286869	0.240411	445	Not significant
jockey	MUN-016	0.0195981	0.010101	0.0307942	57	Under-represented in chimeric transcripts
LARD	MUN-016	1.95264e-16	0.020202	0.189087	350	Under-represented in chimeric transcripts
P-element	MUN-016	0.379393	0.0121212	0.0194489	36	Not significant
pogo	MUN-016	0.0852966	0.00606061	0.0183684	34	Not significant
roo	MUN-016	1.64957e-70	0.387879	0.0410589	76	Over-represented in chimeric transcripts
Rt1b	MUN-016	0.154166	0.0040404	0.012966	24	Not significant
S-element	MUN-016	0.237195	0.00808081	0.0167477	31	Not significant
1360	SLA-001	0.0651338	0.0324826	0.0171251	33	Not significant
297	SLA-001	0.164462	0.00464037	0.0145304	28	Not significant
BS	SLA-001	0.148846	0.00232019	0.0114167	22	Not significant
Doc	SLA-001	0.115847	0.00232019	0.0124546	24	Not significant
H	SLA-001	0.00443198	0.00232019	0.026466	51	Under-represented in chimeric transcripts
INE-1	SLA-001	0.00983471	0.331787	0.250649	483	Over-represented in chimeric transcripts
LARD	SLA-001	6.35048e-12	0.0301624	0.179035	345	Under-represented in chimeric transcripts
pogo	SLA-001	0.0797902	0.00232019	0.0140114	27	Not significant
roo	SLA-001	4.02447e-78	0.399072	0.0347691	67	Over-represented in chimeric transcripts
Rt1b	SLA-001	0.131286	0.00232019	0.0119357	23	Not significant
S-element	SLA-001	1	0.0116009	0.0124546	24	Not significant
1360	TOM-007	0.337179	0.025641	0.0172414	35	Not significant
297	TOM-007	0.134705	0.002331	0.0118227	24	Not significant
F-element	TOM-007	0.370832	0.004662	0.0108374	22	Not significant
FB4	TOM-007	0.193432	0.004662	0.0137931	28	Not significant
H	TOM-007	0.0132894	0.002331	0.0216749	44	Under-represented in chimeric transcripts
I-element	TOM-007	0.0944467	0.002331	0.0133005	27	Not significant
INE-1	TOM-007	0.817274	0.244755	0.237438	482	Not significant
jockey	TOM-007	0.0043687	0.00699301	0.0349754	71	Under-represented in chimeric transcripts
LARD	TOM-007	5.01799e-13	0.020979	0.173399	352	Under-represented in chimeric transcripts
P-element	TOM-007	0.794056	0.020979	0.017734	36	Not significant
pogo	TOM-007	0.406659	0.00932401	0.0162562	33	Not significant
roo	TOM-007	1.34445e-82	0.414918	0.0364532	74	Over-represented in chimeric transcripts
Rt1b	TOM-007	0.240542	0.004662	0.0128079	26	Not significant
S-element	TOM-007	0.412813	0.004662	0.0103448	21	Not significant
E. TE families distribution in gene-TE chimeras, globally and by insertion group.
Type	TE family	Number of chimeric genes	Percentage
All	Others	226	0.235172
	gypsy12	9	0.00936524
	Gypsy-2_Dsim	9	0.00936524
	pogo	10	0.0104058
	jockey	11	0.0114464
	S-element	14	0.0145682
	P-element	18	0.0187305
	LARD	22	0.0228928
	1360	26	0.0270552
	INE-1	250	0.260146
	roo	366	0.380853
Overlap and AS insertions	Others	173	0.440204
	P-element	18	0.0458015
	LARD	21	0.0534351
	1360	22	0.0559796
	roo	48	0.122137
	INE-1	111	0.282443
Internal insertions	Others	103	0.305638
	INE-1	100	0.296736
	roo	134	0.397626
All (≥120 bp)	Others	219	0.368067
	P-element	18	0.0302521
	LARD	22	0.0369748
	1360	25	0.0420168
	INE-1	155	0.260504
	roo	156	0.262185
Overlap and AS insertions (≥120 bp)	Others	173	0.440204
	P-element	18	0.0458015
	LARD	21	0.0534351
	1360	22	0.0559796
	roo	48	0.122137
	INE-1	111	0.282443
Internal insertions (≥120 bp)	Others	103	0.305638
	INE-1	100	0.296736
	roo	134	0.397626
F. Blast results after match roo fragments with the genome. Only top 20 matches were considered.
Transcript	Gene	Body part	Assembly	Total matches	Match with roo (list position)	Match with gene (list position)	Match with intergenic (list position)
FBtr0301501	FBgn0011754	Ovary	MUN-016	20	NA	1	10
FBtr0083218	FBgn0038391	Gut	AKA-017	1	NA	1	NA
FBtr0083218	FBgn0038391	Gut	AKA-017	20	4	1	2
FBtr0083218	FBgn0038391	Gut	AKA-017	18	NA	1	NA
FBtr0087257	FBgn0034072	Ovary	MUN-016	1	NA	1	NA
FBtr0087258	FBgn0034072	Ovary	MUN-016	1	NA	1	NA
FBtr0083998	FBgn0013995	Head	AKA-017	1	NA	1	NA
FBtr0083998	FBgn0013995	Head	AKA-017	1	NA	1	NA
FBtr0100599	FBgn0024251	Gut	TOM-007	3	NA	1	NA
FBtr0331745	FBgn0024251	Gut	TOM-007	3	NA	1	NA
FBtr0331744	FBgn0024251	Gut	TOM-007	3	NA	1	NA
FBtr0304582	FBgn0010015	Head	AKA-017	1	NA	1	NA
FBtr0337028	FBgn0039054	Head	AKA-017	1	NA	1	NA
FBtr0302023	FBgn0039054	Head	AKA-017	1	NA	1	NA
FBtr0334742	FBgn0037326	Head	MUN-016	1	NA	1	NA
FBtr0345227	FBgn0000659	Gut	MUN-016	1	NA	1	NA
FBtr0345227	FBgn0000659	Gut	MUN-016	13	7	1	NA
FBtr0304975	FBgn0036534	Gut	MUN-016	20	16	1	7
FBtr0347540	FBgn0037098	Ovary	AKA-017	1	NA	1	NA
FBtr0347540	FBgn0037098	Ovary	AKA-017	1	NA	1	NA
FBtr0346819	FBgn0037098	Ovary	AKA-017	1	NA	1	NA
FBtr0346819	FBgn0037098	Ovary	AKA-017	1	NA	1	NA
FBtr0100599	FBgn0024251	Gut	AKA-017	3	NA	1	NA
FBtr0331744	FBgn0024251	Gut	AKA-017	3	NA	1	NA
FBtr0084177	FBgn0264491	Ovary	SLA-001	1	NA	1	NA
FBtr0333774	FBgn0264678	Ovary	TOM-007	8	NA	1	NA
FBtr0333774	FBgn0264678	Ovary	TOM-007	2	NA	1	NA
FBtr0333774	FBgn0264678	Ovary	TOM-007	19	NA	1	NA
FBtr0077850	FBgn0000097	Gut	MUN-016	5	NA	1	NA
FBtr0077957	FBgn0031306	Head	JUT-011	1	NA	1	NA
FBtr0077957	FBgn0031306	Head	JUT-011	20	NA	1	12
FBtr0310423	FBgn0050389	Gut	JUT-011	20	NA	1	6
FBtr0310423	FBgn0050389	Gut	JUT-011	20	NA	1	NA
FBtr0310423	FBgn0050389	Gut	JUT-011	20	NA	1	NA
FBtr0310423	FBgn0050389	Gut	JUT-011	1	NA	1	NA
FBtr0310423	FBgn0050389	Gut	JUT-011	20	NA	1	19
FBtr0310423	FBgn0050389	Gut	JUT-011	1	NA	1	NA
FBtr0331515	FBgn0264307	Gut	JUT-011	20	16	1	NA
FBtr0074634	FBgn0283473	Head	TOM-007	3	2	NA	1
FBtr0343830	FBgn0085370	Head	TOM-007	2	NA	1	NA
FBtr0082116	FBgn0037705	Gut	SLA-001	2	NA	1	NA
FBtr0343556	FBgn0266101	Gut	MUN-016	1	NA	1	NA
FBtr0343556	FBgn0266101	Gut	MUN-016	20	6	1	7
FBtr0343556	FBgn0266101	Gut	SLA-001	1	NA	1	NA
FBtr0343556	FBgn0266101	Gut	SLA-001	20	6	1	7
FBtr0304697	FBgn0000662	Ovary	TOM-007	17	NA	1	NA
FBtr0304697	FBgn0000662	Ovary	TOM-007	6	NA	1	NA
FBtr0304697	FBgn0000662	Ovary	TOM-007	1	NA	1	NA
FBtr0304697	FBgn0000662	Ovary	TOM-007	17	NA	1	NA
FBtr0304697	FBgn0000662	Ovary	TOM-007	6	NA	1	NA
FBtr0304697	FBgn0000662	Ovary	TOM-007	1	NA	1	NA
FBtr0310080	FBgn0260386	Gut	SLA-001	2	NA	1	NA
FBtr0310080	FBgn0260386	Gut	SLA-001	2	NA	1	NA
FBtr0310081	FBgn0260386	Gut	SLA-001	2	NA	1	NA
FBtr0310081	FBgn0260386	Gut	SLA-001	2	NA	1	NA
FBtr0303163	FBgn0085370	Head	SLA-001	19	16	1	2
FBtr0330107	FBgn0039862	Head	SLA-001	20	11	1	17
FBtr0303080	FBgn0261698	Ovary	MUN-016	20	2	1	7
FBtr0306615	FBgn0053558	Ovary	TOM-007	20	17	1	11
FBtr0306615	FBgn0053558	Ovary	TOM-007	1	NA	1	NA
FBtr0332942	FBgn0053558	Ovary	TOM-007	20	17	1	11
FBtr0113470	FBgn0053558	Ovary	TOM-007	20	17	1	11
FBtr0080315	FBgn0042127	Ovary	SLA-001	2	NA	1	NA
FBtr0080315	FBgn0042127	Ovary	SLA-001	4	4	1	NA
FBtr0080315	FBgn0042127	Ovary	SLA-001	4	NA	1	NA
FBtr0080315	FBgn0042127	Ovary	SLA-001	1	NA	1	NA
FBtr0334747	FBgn0004179	Ovary	JUT-011	1	NA	1	NA
FBtr0334747	FBgn0004179	Ovary	JUT-011	20	2	1	16
FBtr0110916	FBgn0260003	Ovary	MUN-016	1	NA	1	NA
FBtr0301313	FBgn0265991	Ovary	TOM-007	1	NA	1	NA
FBtr0392902	FBgn0265991	Ovary	TOM-007	1	NA	1	NA
FBtr0304887	FBgn0000286	Ovary	AKA-017	20	3	1	NA
FBtr0342796	FBgn0015524	Gut	AKA-017	4	NA	1	NA
FBtr0305134	FBgn0004198	Head	JUT-011	1	NA	1	NA
FBtr0305134	FBgn0004198	Head	JUT-011	2	NA	1	NA
FBtr0331744	FBgn0024251	Ovary	SLA-001	3	NA	1	NA
FBtr0100599	FBgn0024251	Ovary	SLA-001	3	NA	1	NA
FBtr0306240	FBgn0016081	Head	JUT-011	20	2	1	9
FBtr0306240	FBgn0016081	Head	JUT-011	19	2	1	4
FBtr0306240	FBgn0016081	Head	JUT-011	20	2	1	9
FBtr0306240	FBgn0016081	Head	JUT-011	19	2	1	4
FBtr0306241	FBgn0016081	Head	JUT-011	20	2	1	9
FBtr0306241	FBgn0016081	Head	JUT-011	19	2	1	4
FBtr0306242	FBgn0016081	Head	JUT-011	20	2	1	9
FBtr0306242	FBgn0016081	Head	JUT-011	19	2	1	4
FBtr0306240	FBgn0016081	Head	JUT-011	20	2	1	9
FBtr0306240	FBgn0016081	Head	JUT-011	19	2	1	4
FBtr0078582	FBgn0027339	Head	JUT-011	20	NA	1	NA
FBtr0304975	FBgn0036534	Gut	JUT-011	20	16	1	7
FBtr0081613	FBgn0261238	Head	MUN-016	2	NA	1	NA
FBtr0081613	FBgn0261238	Head	MUN-016	1	NA	1	NA
FBtr0081613	FBgn0261238	Head	MUN-016	4	NA	1	NA
FBtr0334672	FBgn0261238	Head	MUN-016	2	NA	1	NA
FBtr0334672	FBgn0261238	Head	MUN-016	1	NA	1	NA
FBtr0334672	FBgn0261238	Head	MUN-016	4	NA	1	NA
FBtr0331397	FBgn0037206	Head	MUN-016	2	NA	1	NA
FBtr0072601	FBgn0035160	Ovary	MUN-016	9	2	1	7
FBtr0072601	FBgn0035160	Ovary	MUN-016	20	5	1	NA
FBtr0072601	FBgn0035160	Ovary	MUN-016	1	NA	1	NA
FBtr0082116	FBgn0037705	Head	MUN-016	2	NA	1	NA
FBtr0082117	FBgn0037705	Head	MUN-016	2	NA	1	NA
FBtr0333774	FBgn0264678	Gut	MUN-016	17	NA	1	NA
FBtr0333774	FBgn0264678	Gut	MUN-016	5	NA	1	NA
FBtr0302964	FBgn0030121	Gut	MUN-016	2	NA	1	NA
FBtr0302964	FBgn0030121	Gut	MUN-016	2	NA	1	NA
FBtr0302964	FBgn0030121	Gut	MUN-016	1	NA	1	NA
FBtr0302964	FBgn0030121	Gut	MUN-016	4	NA	1	NA
FBtr0302964	FBgn0030121	Gut	MUN-016	20	NA	1	NA
FBtr0302964	FBgn0030121	Gut	MUN-016	20	NA	1	NA
FBtr0302964	FBgn0030121	Gut	MUN-016	10	NA	1	NA
FBtr0302964	FBgn0030121	Gut	MUN-016	2	NA	1	NA
FBtr0304697	FBgn0000662	Gut	TOM-007	17	NA	1	NA
FBtr0304697	FBgn0000662	Gut	TOM-007	6	NA	1	NA
FBtr0304697	FBgn0000662	Gut	TOM-007	1	NA	1	NA
FBtr0304697	FBgn0000662	Gut	TOM-007	17	NA	1	NA
FBtr0304697	FBgn0000662	Gut	TOM-007	6	NA	1	NA
FBtr0304697	FBgn0000662	Gut	TOM-007	1	NA	1	NA
FBtr0089678	FBgn0003464	Head	MUN-016	4	NA	1	NA
FBtr0089678	FBgn0003464	Head	MUN-016	20	NA	1	NA
FBtr0089678	FBgn0003464	Head	MUN-016	20	NA	2	1
FBtr0074920	FBgn0014037	Head	MUN-016	1	NA	1	NA
FBtr0074920	FBgn0014037	Head	MUN-016	18	15	1	12
FBtr0074920	FBgn0014037	Head	MUN-016	1	NA	1	NA
FBtr0074920	FBgn0014037	Head	MUN-016	1	NA	1	NA
FBtr0343314	FBgn0004101	Gut	JUT-011	20	5	1	19
FBtr0340450	FBgn0000578	Ovary	JUT-011	20	6	1	16
FBtr0086584	FBgn0000578	Ovary	JUT-011	20	6	1	16
FBtr0086582	FBgn0000578	Ovary	JUT-011	20	6	1	16
FBtr0086583	FBgn0000578	Ovary	JUT-011	20	6	1	16
FBtr0100174	FBgn0000578	Ovary	JUT-011	20	6	1	16
FBtr0273326	FBgn0050361	Head	AKA-017	2	NA	1	NA
FBtr0273326	FBgn0050361	Head	AKA-017	1	NA	1	NA
FBtr0273326	FBgn0050361	Head	AKA-017	1	NA	1	NA
FBtr0345418	FBgn0028953	Head	MUN-016	20	20	1	NA
FBtr0345418	FBgn0028953	Head	MUN-016	20	20	1	NA
FBtr0112820	FBgn0003175	Gut	MUN-016	40	9	1	3
FBtr0112820	FBgn0003175	Gut	MUN-016	2	NA	1	NA
FBtr0071838	FBgn0003175	Gut	MUN-016	20	9	1	3
FBtr0071838	FBgn0003175	Gut	MUN-016	1	NA	1	NA
FBtr0070204	FBgn0040357	Ovary	SLA-001	1	NA	1	NA
FBtr0072468	FBgn0020386	Head	TOM-007	20	NA	1	NA
FBtr0072468	FBgn0020386	Head	TOM-007	20	3	1	2
FBtr0333218	FBgn0020386	Head	TOM-007	20	NA	1	NA
FBtr0333218	FBgn0020386	Head	TOM-007	20	3	1	2
FBtr0075330	FBgn0036668	Head	JUT-011	1	NA	1	NA
FBtr0075330	FBgn0036668	Head	JUT-011	1	NA	1	NA
FBtr0075330	FBgn0036668	Head	JUT-011	11	NA	1	NA
FBtr0075330	FBgn0036668	Head	JUT-011	4	NA	1	NA
FBtr0304697	FBgn0000662	Ovary	AKA-017	20	NA	1	NA
FBtr0304697	FBgn0000662	Ovary	AKA-017	1	NA	1	NA
FBtr0304697	FBgn0000662	Ovary	AKA-017	20	NA	1	NA
FBtr0304697	FBgn0000662	Ovary	AKA-017	1	NA	1	NA
FBtr0336616	FBgn0262160	Head	JUT-011	1	NA	1	NA
FBtr0310277	FBgn0262160	Head	JUT-011	1	NA	1	NA
FBtr0113067	FBgn0033639	Head	MUN-016	2	NA	1	NA
FBtr0113067	FBgn0033639	Head	MUN-016	1	NA	1	NA
FBtr0073841	FBgn0001612	Ovary	AKA-017	20	NA	1	17
FBtr0080187	FBgn0032305	Ovary	TOM-007	1	NA	1	NA
FBtr0339612	FBgn0039419	Ovary	MUN-016	20	5	1	NA
FBtr0343830	FBgn0085370	Head	MUN-016	19	16	1	2
FBtr0113444	FBgn0052654	Head	SLA-001	20	NA	1	NA
FBtr0301501	FBgn0011754	Ovary	SLA-001	20	NA	1	10
FBtr0077765	FBgn0031420	Head	AKA-017	7	7	1	NA
FBtr0073573	FBgn0260780	Ovary	AKA-017	20	4	1	NA
FBtr0073573	FBgn0260780	Ovary	AKA-017	20	NA	1	NA
FBtr0073573	FBgn0260780	Ovary	AKA-017	1	NA	1	NA
FBtr0073573	FBgn0260780	Ovary	AKA-017	1	NA	1	NA
FBtr0073573	FBgn0260780	Ovary	AKA-017	1	NA	1	NA
FBtr0112827	FBgn0003345	Gut	JUT-011	5	NA	1	5
FBtr0112827	FBgn0003345	Gut	JUT-011	20	NA	1	NA
FBtr0302910	FBgn0265298	Ovary	AKA-017	2	NA	1	NA
FBtr0302910	FBgn0265298	Ovary	AKA-017	1	NA	1	NA
FBtr0306252	FBgn0265298	Ovary	AKA-017	2	NA	1	NA
FBtr0306252	FBgn0265298	Ovary	AKA-017	1	NA	1	NA
FBtr0331744	FBgn0024251	Head	AKA-017	3	NA	1	NA
FBtr0309697	FBgn0263560	Ovary	JUT-011	1	NA	1	NA
FBtr0331397	FBgn0037206	Head	AKA-017	2	NA	1	NA
FBtr0078560	FBgn0037206	Head	AKA-017	2	NA	1	NA
FBtr0305011	FBgn0262562	Ovary	AKA-017	20	4	1	2
FBtr0305011	FBgn0262562	Ovary	AKA-017	20	8	1	3
FBtr0305011	FBgn0262562	Ovary	AKA-017	20	NA	1	3
FBtr0083018	FBgn0011217	Ovary	TOM-007	20	NA	1	NA
FBtr0083018	FBgn0011217	Ovary	TOM-007	2	NA	1	NA
FBtr0080252	FBgn0015400	Head	MUN-016	20	6	1	3
FBtr0345384	FBgn0036746	Gut	TOM-007	14	NA	1	NA
FBtr0345384	FBgn0036746	Gut	TOM-007	20	7	1	18
FBtr0345384	FBgn0036746	Gut	TOM-007	20	NA	1	20
FBtr0302710	FBgn0261555	Gut	MUN-016	1	NA	1	NA
FBtr0302709	FBgn0261555	Gut	MUN-016	1	NA	1	NA
FBtr0113444	FBgn0052654	Head	TOM-007	20	16	1	9
FBtr0336467	FBgn0042693	Gut	TOM-007	1	NA	1	NA
FBtr0336467	FBgn0042693	Gut	TOM-007	1	NA	1	NA
FBtr0336467	FBgn0042693	Gut	TOM-007	1	NA	1	NA
FBtr0336467	FBgn0042693	Gut	TOM-007	1	NA	1	NA
FBtr0336467	FBgn0042693	Gut	TOM-007	1	NA	1	NA
FBtr0336467	FBgn0042693	Gut	TOM-007	1	NA	1	NA
FBtr0083553	FBgn0042693	Gut	TOM-007	1	NA	1	NA
FBtr0083553	FBgn0042693	Gut	TOM-007	1	NA	1	NA
FBtr0083553	FBgn0042693	Gut	TOM-007	1	NA	1	NA
FBtr0305034	FBgn0042693	Gut	TOM-007	1	NA	1	NA
FBtr0305034	FBgn0042693	Gut	TOM-007	1	NA	1	NA
FBtr0073481	FBgn0030266	Ovary	TOM-007	1	NA	1	NA
FBtr0073841	FBgn0001612	Head	SLA-001	20	NA	1	17
FBtr0073841	FBgn0001612	Ovary	JUT-011	20	NA	1	17
FBtr0080700	FBgn0004837	Ovary	SLA-001	20	2	1	11
FBtr0080700	FBgn0004837	Ovary	SLA-001	20	2	1	11
FBtr0070974	FBgn0029905	Head	AKA-017	20	NA	1	2
FBtr0070974	FBgn0029905	Head	AKA-017	20	8	1	NA
FBtr0308254	FBgn0266557	Gut	TOM-007	1	NA	1	NA
FBtr0078144	FBgn0266557	Gut	TOM-007	1	NA	1	NA
FBtr0075054	FBgn0036811	Gut	TOM-007	20	4	1	9
FBtr0305011	FBgn0262562	Head	MUN-016	2	NA	1	NA
FBtr0305011	FBgn0262562	Head	MUN-016	16	NA	1	NA
FBtr0303751	FBgn0261934	Gut	AKA-017	1	NA	1	NA
FBtr0303751	FBgn0261934	Gut	AKA-017	20	2	1	NA
FBtr0303751	FBgn0261934	Gut	AKA-017	1	NA	1	NA
FBtr0303435	FBgn0261854	Head	MUN-016	2	NA	1	NA
FBtr0303435	FBgn0261854	Head	MUN-016	1	NA	1	NA
FBtr0303435	FBgn0261854	Head	MUN-016	2	NA	1	NA
FBtr0087257	FBgn0034072	Gut	JUT-011	1	NA	1	NA
FBtr0299743	FBgn0265998	Gut	JUT-011	20	20	1	4
FBtr0299743	FBgn0265998	Gut	JUT-011	20	NA	1	2
FBtr0299743	FBgn0265998	Gut	JUT-011	20	NA	1	NA
FBtr0336461	FBgn0265998	Gut	JUT-011	20	20	1	4
FBtr0336461	FBgn0265998	Gut	JUT-011	20	NA	1	2
FBtr0336461	FBgn0265998	Gut	JUT-011	20	NA	1	NA
FBtr0346819	FBgn0037098	Ovary	JUT-011	1	NA	1	NA
FBtr0346819	FBgn0037098	Ovary	JUT-011	1	NA	1	NA
FBtr0347540	FBgn0037098	Ovary	JUT-011	1	NA	1	NA
FBtr0347540	FBgn0037098	Ovary	JUT-011	1	NA	1	NA
FBtr0070950	FBgn0028360	Gut	TOM-007	20	NA	1	NA
FBtr0070950	FBgn0028360	Gut	TOM-007	20	NA	1	NA
FBtr0075171	FBgn0052190	Gut	JUT-011	2	NA	1	NA
FBtr0075171	FBgn0052190	Gut	JUT-011	2	NA	1	NA
FBtr0082117	FBgn0037705	Ovary	MUN-016	2	NA	1	NA
FBtr0082116	FBgn0037705	Ovary	MUN-016	2	NA	1	NA
FBtr0339612	FBgn0039419	Gut	AKA-017	20	5	1	NA
FBtr0074276	FBgn0026575	Ovary	AKA-017	20	NA	1	NA
FBtr0084479	FBgn0051145	Ovary	AKA-017	20	NA	1	10
FBtr0474228	FBgn0286778	Ovary	JUT-011	20	5	1	NA
FBtr0474228	FBgn0286778	Ovary	JUT-011	3	NA	1	NA
FBtr0474228	FBgn0286778	Ovary	JUT-011	7	NA	1	NA
FBtr0474228	FBgn0286778	Ovary	JUT-011	20	NA	1	20
FBtr0072601	FBgn0035160	Gut	JUT-011	9	2	1	7
FBtr0072601	FBgn0035160	Gut	JUT-011	20	5	1	NA
FBtr0072601	FBgn0035160	Gut	JUT-011	1	NA	1	NA
FBtr0305620	FBgn0045852	Gut	JUT-011	20	9	1	8
FBtr0084674	FBgn0039209	Gut	JUT-011	20	NA	1	6
FBtr0110795	FBgn0039209	Gut	JUT-011	20	NA	1	6
FBtr0088487	FBgn0033448	Gut	MUN-016	20	2	1	4
FBtr0339549	FBgn0020445	Ovary	JUT-011	1	NA	1	NA
FBtr0305029	FBgn0262582	Head	TOM-007	2	NA	1	NA
FBtr0072129	FBgn0011236	Ovary	MUN-016	11	NA	1	3
FBtr0080187	FBgn0032305	Gut	MUN-016	20	NA	1	NA
FBtr0302709	FBgn0261555	Head	SLA-001	1	NA	1	NA
FBtr0302710	FBgn0261555	Head	SLA-001	1	NA	1	NA
FBtr0339381	FBgn0259234	Ovary	TOM-007	20	12	1	4
FBtr0113378	FBgn0050460	Head	JUT-011	1	NA	1	NA
FBtr0113378	FBgn0050460	Head	JUT-011	12	NA	1	NA
FBtr0113378	FBgn0050460	Head	JUT-011	1	NA	1	NA
FBtr0113378	FBgn0050460	Head	JUT-011	1	NA	1	NA
FBtr0113378	FBgn0050460	Head	JUT-011	1	NA	1	NA
FBtr0078560	FBgn0037206	Head	SLA-001	2	NA	1	NA
FBtr0331397	FBgn0037206	Head	SLA-001	2	NA	1	NA
FBtr0331396	FBgn0037206	Head	SLA-001	2	NA	1	NA
FBtr0073841	FBgn0001612	Gut	AKA-017	20	NA	1	17
FBtr0307306	FBgn0263108	Head	MUN-016	20	NA	1	NA
FBtr0307306	FBgn0263108	Head	MUN-016	20	5	1	NA
FBtr0301040	FBgn0052982	Gut	MUN-016	20	2	1	NA
FBtr0301040	FBgn0052982	Gut	MUN-016	20	2	1	NA
FBtr0308255	FBgn0266557	Gut	JUT-011	1	NA	1	NA
FBtr0071379	FBgn0000233	Gut	SLA-001	2	NA	1	NA
FBtr0071379	FBgn0000233	Gut	SLA-001	6	NA	1	NA
FBtr0071379	FBgn0000233	Gut	SLA-001	4	NA	1	NA
FBtr0304697	FBgn0000662	Ovary	SLA-001	20	NA	1	NA
FBtr0304697	FBgn0000662	Ovary	SLA-001	20	NA	1	NA
FBtr0304697	FBgn0000662	Ovary	SLA-001	1	NA	1	NA
FBtr0304697	FBgn0000662	Ovary	SLA-001	20	NA	1	NA
FBtr0304697	FBgn0000662	Ovary	SLA-001	20	NA	1	NA
FBtr0304697	FBgn0000662	Ovary	SLA-001	1	NA	1	NA
FBtr0308319	FBgn0283451	Ovary	SLA-001	2	NA	1	NA
FBtr0308319	FBgn0283451	Ovary	SLA-001	20	5	1	NA
FBtr0070266	FBgn0283451	Ovary	SLA-001	2	NA	1	NA
FBtr0070266	FBgn0283451	Ovary	SLA-001	20	5	1	NA
FBtr0070262	FBgn0283451	Ovary	SLA-001	2	NA	1	NA
FBtr0070262	FBgn0283451	Ovary	SLA-001	20	5	1	NA
FBtr0306151	FBgn0063485	Head	AKA-017	3	NA	1	NA
FBtr0306151	FBgn0063485	Head	AKA-017	20	16	1	NA
FBtr0305082	FBgn0033313	Head	MUN-016	20	12	1	3
FBtr0305082	FBgn0033313	Head	MUN-016	20	NA	1	5
FBtr0310448	FBgn0033313	Head	MUN-016	20	12	1	3
FBtr0310448	FBgn0033313	Head	MUN-016	20	NA	1	5
FBtr0310448	FBgn0033313	Head	MUN-016	20	12	1	3
FBtr0310448	FBgn0033313	Head	MUN-016	20	NA	1	5
FBtr0340489	FBgn0265630	Head	MUN-016	2	NA	1	NA
FBtr0340488	FBgn0265630	Head	MUN-016	2	NA	1	NA
FBtr0110916	FBgn0260003	Ovary	SLA-001	1	NA	1	NA
FBtr0308254	FBgn0266557	Head	AKA-017	1	NA	1	NA
FBtr0078144	FBgn0266557	Head	AKA-017	1	NA	1	NA
FBtr0339121	FBgn0050377	Gut	AKA-017	20	NA	1	NA
FBtr0302710	FBgn0261555	Gut	TOM-007	1	NA	1	NA
FBtr0302709	FBgn0261555	Gut	TOM-007	1	NA	1	NA
FBtr0080113	FBgn0032295	Head	MUN-016	20	NA	1	NA
FBtr0080113	FBgn0032295	Head	MUN-016	11	NA	1	NA
FBtr0342952	FBgn0052772	Ovary	SLA-001	2	NA	1	NA
FBtr0300997	FBgn0052772	Ovary	SLA-001	2	NA	1	NA
FBtr0342952	FBgn0052772	Ovary	SLA-001	2	NA	1	NA
FBtr0344383	FBgn0262127	Ovary	TOM-007	20	NA	1	8
FBtr0344383	FBgn0262127	Ovary	TOM-007	20	5	1	13
FBtr0075580	FBgn0041160	Gut	AKA-017	20	6	1	16
FBtr0075054	FBgn0036811	Ovary	JUT-011	20	4	1	9
FBtr0347211	FBgn0053208	Ovary	AKA-017	12	10	1	NA
FBtr0082206	FBgn0053208	Ovary	AKA-017	12	10	1	NA
FBtr0113444	FBgn0052654	Head	AKA-017	20	NA	1	NA
FBtr0302650	FBgn0261547	Ovary	AKA-017	1	NA	1	NA
FBtr0302651	FBgn0261547	Ovary	AKA-017	1	NA	1	NA
FBtr0089261	FBgn0278608	Head	TOM-007	20	NA	1	13
FBtr0289960	FBgn0278608	Head	TOM-007	20	NA	1	13
FBtr0089261	FBgn0278608	Head	TOM-007	20	NA	1	13
FBtr0332087	FBgn0036285	Gut	AKA-017	2	NA	1	NA
FBtr0330085	FBgn0045862	Gut	AKA-017	1	NA	1	NA
FBtr0330085	FBgn0045862	Gut	AKA-017	20	4	1	3
FBtr0085221	FBgn0045862	Gut	AKA-017	1	NA	1	NA
FBtr0085221	FBgn0045862	Gut	AKA-017	20	4	1	3
FBtr0071903	FBgn0034795	Head	TOM-007	20	1	3	5
FBtr0071903	FBgn0034795	Head	TOM-007	1	NA	1	NA
FBtr0113067	FBgn0033639	Head	SLA-001	1	NA	1	NA
FBtr0113067	FBgn0033639	Head	SLA-001	1	NA	1	NA
FBtr0113067	FBgn0033639	Head	SLA-001	1	NA	1	NA
FBtr0076368	FBgn0004390	Head	SLA-001	20	NA	1	17
FBtr0076368	FBgn0004390	Head	SLA-001	20	NA	1	NA
FBtr0076368	FBgn0004390	Head	SLA-001	20	5	1	NA
FBtr0076368	FBgn0004390	Head	SLA-001	20	NA	1	17
FBtr0076368	FBgn0004390	Head	SLA-001	20	NA	1	NA
FBtr0076368	FBgn0004390	Head	SLA-001	20	5	1	NA
FBtr0075580	FBgn0041160	Ovary	TOM-007	20	6	1	16
FBtr0302910	FBgn0265298	Gut	JUT-011	1	NA	1	NA
FBtr0302910	FBgn0265298	Gut	JUT-011	20	NA	1	11
FBtr0306252	FBgn0265298	Gut	JUT-011	1	NA	1	NA
FBtr0306252	FBgn0265298	Gut	JUT-011	20	NA	1	11
FBtr0342952	FBgn0052772	Head	MUN-016	2	NA	1	NA
FBtr0343276	FBgn0025335	Gut	JUT-011	20	NA	1	9
FBtr0089052	FBgn0002930	Head	TOM-007	8	NA	1	8
FBtr0070204	FBgn0040357	Ovary	MUN-016	1	NA	1	NA
FBtr0077765	FBgn0031420	Ovary	JUT-011	7	7	1	NA
FBtr0333486	FBgn0032586	Head	TOM-007	7	NA	1	7
FBtr0072285	FBgn0034976	Ovary	SLA-001	1	NA	1	NA
FBtr0080700	FBgn0004837	Head	MUN-016	20	2	1	11
FBtr0080700	FBgn0004837	Head	MUN-016	20	2	1	11
FBtr0070914	FBgn0000524	Ovary	JUT-011	20	NA	1	11
FBtr0070914	FBgn0000524	Ovary	JUT-011	20	NA	1	15
FBtr0070914	FBgn0000524	Ovary	JUT-011	20	NA	1	NA
FBtr0070914	FBgn0000524	Ovary	JUT-011	20	NA	1	NA
FBtr0070680	FBgn0003053	Gut	JUT-011	20	NA	1	NA
FBtr0070680	FBgn0003053	Gut	JUT-011	1	NA	1	NA
FBtr0080187	FBgn0032305	Head	AKA-017	1	NA	1	NA
FBtr0345638	FBgn0051908	Head	SLA-001	7	NA	1	NA
FBtr0340020	FBgn0034071	Gut	AKA-017	2	NA	1	NA
FBtr0071846	FBgn0034720	Ovary	MUN-016	1	NA	1	NA
FBtr0342990	FBgn0034720	Ovary	MUN-016	1	NA	1	NA
FBtr0336617	FBgn0262160	Gut	MUN-016	1	NA	1	NA
FBtr0340490	FBgn0265629	Head	AKA-017	2	NA	1	NA
FBtr0340490	FBgn0265629	Head	AKA-017	2	NA	1	NA
FBtr0089678	FBgn0003464	Gut	MUN-016	4	NA	1	NA
FBtr0089678	FBgn0003464	Gut	MUN-016	20	NA	1	NA
FBtr0089678	FBgn0003464	Gut	MUN-016	20	NA	2	1
FBtr0301071	FBgn0036274	Head	MUN-016	5	NA	1	3
FBtr0301071	FBgn0036274	Head	MUN-016	1	NA	1	NA
FBtr0290112	FBgn0033313	Head	AKA-017	20	12	1	3
FBtr0290112	FBgn0033313	Head	AKA-017	20	NA	1	5
FBtr0305081	FBgn0033313	Head	AKA-017	20	12	1	3
FBtr0305081	FBgn0033313	Head	AKA-017	20	NA	1	5
FBtr0310448	FBgn0033313	Head	AKA-017	20	12	1	3
FBtr0310448	FBgn0033313	Head	AKA-017	20	NA	1	5
FBtr0305082	FBgn0033313	Head	AKA-017	20	12	1	3
FBtr0305082	FBgn0033313	Head	AKA-017	20	NA	1	5
FBtr0310448	FBgn0033313	Head	AKA-017	20	12	1	3
FBtr0310448	FBgn0033313	Head	AKA-017	20	NA	1	5
FBtr0345418	FBgn0028953	Head	AKA-017	20	20	1	NA
FBtr0073454	FBgn0000499	Gut	MUN-016	20	NA	1	NA
FBtr0073454	FBgn0000499	Gut	MUN-016	10	NA	1	NA
FBtr0303884	FBgn0051875	Ovary	TOM-007	2	NA	1	NA
FBtr0306252	FBgn0265298	Gut	SLA-001	2	NA	1	NA
FBtr0306252	FBgn0265298	Gut	SLA-001	1	NA	1	NA
FBtr0302910	FBgn0265298	Gut	SLA-001	2	NA	1	NA
FBtr0302910	FBgn0265298	Gut	SLA-001	1	NA	1	NA
FBtr0343564	FBgn0025638	Ovary	SLA-001	1	NA	1	NA
FBtr0079139	FBgn0031740	Gut	SLA-001	1	NA	1	NA
FBtr0079139	FBgn0031740	Gut	SLA-001	1	NA	1	NA
FBtr0079139	FBgn0031740	Gut	SLA-001	1	NA	1	NA
FBtr0084479	FBgn0051145	Gut	TOM-007	20	NA	1	2
FBtr0300827	FBgn0037525	Ovary	MUN-016	20	4	1	NA
FBtr0300827	FBgn0037525	Ovary	MUN-016	20	NA	1	NA
FBtr0333829	FBgn0037525	Ovary	MUN-016	20	4	1	NA
FBtr0333829	FBgn0037525	Ovary	MUN-016	20	NA	1	NA
FBtr0290112	FBgn0033313	Ovary	MUN-016	20	12	1	3
FBtr0290112	FBgn0033313	Ovary	MUN-016	20	NA	1	5
FBtr0305082	FBgn0033313	Ovary	MUN-016	20	12	1	3
FBtr0305082	FBgn0033313	Ovary	MUN-016	20	NA	1	5
FBtr0310448	FBgn0033313	Ovary	MUN-016	20	12	1	3
FBtr0310448	FBgn0033313	Ovary	MUN-016	20	NA	1	5
FBtr0345638	FBgn0051908	Ovary	MUN-016	11	NA	1	NA
FBtr0310086	FBgn0265991	Head	AKA-017	1	NA	1	NA
FBtr0087315	FBgn0265991	Head	AKA-017	1	NA	1	NA
FBtr0310065	FBgn0260938	Head	MUN-016	1	NA	1	NA
FBtr0112795	FBgn0000289	Head	AKA-017	20	NA	1	20
FBtr0112795	FBgn0000289	Head	AKA-017	20	NA	1	NA
FBtr0112795	FBgn0000289	Head	AKA-017	1	NA	1	NA
FBtr0087528	FBgn0000289	Head	AKA-017	20	NA	1	20
FBtr0087528	FBgn0000289	Head	AKA-017	20	NA	1	NA
FBtr0087528	FBgn0000289	Head	AKA-017	1	NA	1	NA
FBtr0112795	FBgn0000289	Head	AKA-017	20	NA	1	20
FBtr0112795	FBgn0000289	Head	AKA-017	20	NA	1	NA
FBtr0112795	FBgn0000289	Head	AKA-017	1	NA	1	NA
FBtr0301071	FBgn0036274	Head	AKA-017	5	NA	1	3
FBtr0301071	FBgn0036274	Head	AKA-017	1	NA	1	NA
FBtr0112843	FBgn0004860	Head	AKA-017	1	NA	1	NA
FBtr0112843	FBgn0004860	Head	AKA-017	2	NA	1	NA
FBtr0303454	FBgn0004369	Ovary	TOM-007	20	NA	1	NA
FBtr0303454	FBgn0004369	Ovary	TOM-007	1	NA	1	NA
FBtr0076368	FBgn0004390	Head	MUN-016	1	NA	1	NA
FBtr0076368	FBgn0004390	Head	MUN-016	1	NA	1	NA
FBtr0070396	FBgn0000810	Head	JUT-011	1	NA	1	NA
FBtr0346608	FBgn0003464	Head	SLA-001	5	NA	1	NA
FBtr0346608	FBgn0003464	Head	SLA-001	20	NA	1	NA
FBtr0346608	FBgn0003464	Head	SLA-001	20	NA	1	NA
FBtr0089678	FBgn0003464	Head	SLA-001	5	NA	1	NA
FBtr0089678	FBgn0003464	Head	SLA-001	20	NA	1	NA
FBtr0089678	FBgn0003464	Head	SLA-001	20	NA	1	NA
FBtr0085720	FBgn0011739	Gut	JUT-011	1	NA	1	NA
FBtr0085720	FBgn0011739	Gut	JUT-011	20	10	1	2
FBtr0079139	FBgn0031740	Gut	MUN-016	1	NA	1	NA
FBtr0079139	FBgn0031740	Gut	MUN-016	1	NA	1	NA
FBtr0088487	FBgn0033448	Ovary	TOM-007	20	2	1	4
FBtr0073387	FBgn0030251	Head	AKA-017	18	14	2	1
FBtr0073387	FBgn0030251	Head	AKA-017	7	NA	2	1
FBtr0073387	FBgn0030251	Head	AKA-017	20	NA	2	1
FBtr0073387	FBgn0030251	Head	AKA-017	18	14	2	1
FBtr0073387	FBgn0030251	Head	AKA-017	7	NA	2	1
FBtr0073387	FBgn0030251	Head	AKA-017	20	NA	2	1
FBtr0082396	FBgn0037906	Head	MUN-016	2	NA	1	NA
FBtr0072285	FBgn0034976	Ovary	TOM-007	1	NA	1	NA
FBtr0336617	FBgn0262160	Ovary	JUT-011	1	NA	1	NA
FBtr0336617	FBgn0262160	Ovary	JUT-011	1	NA	1	NA
FBtr0336617	FBgn0262160	Ovary	JUT-011	1	NA	1	NA
FBtr0310277	FBgn0262160	Ovary	JUT-011	1	NA	1	NA
FBtr0085355	FBgn0039601	Ovary	TOM-007	2	NA	1	NA
FBtr0333070	FBgn0033636	Head	MUN-016	20	7	1	NA
FBtr0113066	FBgn0033636	Head	MUN-016	20	7	1	NA
FBtr0088091	FBgn0033636	Head	MUN-016	20	7	1	NA
FBtr0331183	FBgn0003651	Head	MUN-016	1	NA	1	NA
FBtr0331183	FBgn0003651	Head	MUN-016	1	NA	1	NA
FBtr0075330	FBgn0036668	Ovary	JUT-011	1	NA	1	NA
FBtr0075330	FBgn0036668	Ovary	JUT-011	1	NA	1	NA
FBtr0075330	FBgn0036668	Ovary	JUT-011	11	NA	1	NA
FBtr0075330	FBgn0036668	Ovary	JUT-011	4	NA	1	NA
FBtr0070396	FBgn0000810	Gut	SLA-001	1	NA	1	NA
FBtr0344714	FBgn0260386	Ovary	TOM-007	2	NA	1	NA
FBtr0330045	FBgn0038233	Gut	MUN-016	20	NA	1	4
FBtr0331983	FBgn0053988	Head	TOM-007	20	14	1	4
FBtr0074174	FBgn0026076	Gut	MUN-016	1	NA	1	NA
FBtr0334498	FBgn0004882	Gut	JUT-011	1	NA	1	NA
FBtr0334498	FBgn0004882	Gut	JUT-011	20	NA	1	4
FBtr0084479	FBgn0051145	Ovary	SLA-001	20	NA	1	2
FBtr0070204	FBgn0040357	Ovary	AKA-017	1	NA	1	NA
FBtr0339612	FBgn0039419	Ovary	AKA-017	20	5	1	NA
FBtr0075708	FBgn0013263	Ovary	SLA-001	7	NA	1	NA
FBtr0100444	FBgn0013263	Ovary	SLA-001	7	NA	1	NA
FBtr0339121	FBgn0050377	Ovary	SLA-001	19	11	1	8
FBtr0290034	FBgn0000289	Ovary	SLA-001	20	NA	1	20
FBtr0085718	FBgn0039807	Head	MUN-016	2	NA	1	NA
FBtr0070988	FBgn0029893	Head	AKA-017	6	NA	1	NA
FBtr0070988	FBgn0029893	Head	AKA-017	20	NA	1	14
FBtr0070988	FBgn0029893	Head	AKA-017	20	NA	1	NA
FBtr0070988	FBgn0029893	Head	AKA-017	12	10	1	NA
FBtr0070988	FBgn0029893	Head	AKA-017	1	NA	1	NA
FBtr0070988	FBgn0029893	Head	AKA-017	6	NA	1	NA
FBtr0070988	FBgn0029893	Head	AKA-017	7	NA	1	NA
FBtr0304887	FBgn0000286	Gut	TOM-007	20	3	1	NA
FBtr0304887	FBgn0000286	Gut	TOM-007	20	3	1	NA
FBtr0072578	FBgn0000575	Head	AKA-017	1	NA	1	NA
FBtr0343357	FBgn0259734	Head	MUN-016	13	NA	1	NA
FBtr0343357	FBgn0259734	Head	MUN-016	1	NA	1	NA
FBtr0302907	FBgn0259734	Head	MUN-016	13	NA	1	NA
FBtr0302907	FBgn0259734	Head	MUN-016	1	NA	1	NA
FBtr0300001	FBgn0259734	Head	MUN-016	13	NA	1	NA
FBtr0300001	FBgn0259734	Head	MUN-016	1	NA	1	NA
FBtr0302905	FBgn0259734	Head	MUN-016	13	NA	1	NA
FBtr0302905	FBgn0259734	Head	MUN-016	1	NA	1	NA
FBtr0088100	FBgn0003396	Head	AKA-017	2	NA	1	NA
FBtr0088100	FBgn0003396	Head	AKA-017	2	NA	1	NA
FBtr0088100	FBgn0003396	Head	AKA-017	1	NA	1	NA
FBtr0088100	FBgn0003396	Head	AKA-017	1	NA	1	NA
FBtr0344752	FBgn0266579	Gut	AKA-017	6	NA	1	NA
FBtr0113428	FBgn0260943	Head	TOM-007	1	NA	1	NA
FBtr0113428	FBgn0260943	Head	TOM-007	19	NA	1	3
FBtr0310448	FBgn0033313	Head	TOM-007	20	12	1	3
FBtr0310448	FBgn0033313	Head	TOM-007	20	NA	1	5
FBtr0310448	FBgn0033313	Head	TOM-007	20	12	1	3
FBtr0310448	FBgn0033313	Head	TOM-007	20	NA	1	5
FBtr0310448	FBgn0033313	Head	TOM-007	20	12	1	3
FBtr0310448	FBgn0033313	Head	TOM-007	20	NA	1	5
FBtr0310448	FBgn0033313	Head	TOM-007	20	12	1	3
FBtr0310448	FBgn0033313	Head	TOM-007	20	NA	1	5
FBtr0087346	FBgn0023441	Ovary	TOM-007	1	NA	1	NA
FBtr0088114	FBgn0033602	Head	SLA-001	20	11	1	7
FBtr0346357	FBgn0267199	Head	SLA-001	5	NA	2	1
FBtr0085236	FBgn0039543	Gut	MUN-016	20	4	1	3
FBtr0085239	FBgn0039543	Gut	MUN-016	20	4	1	3
FBtr0452077	FBgn0039543	Gut	MUN-016	20	4	1	3
FBtr0080187	FBgn0032305	Ovary	MUN-016	20	NA	1	NA
FBtr0309697	FBgn0263560	Ovary	MUN-016	20	NA	1	NA
FBtr0345085	FBgn0266696	Ovary	JUT-011	1	NA	1	NA
FBtr0345085	FBgn0266696	Ovary	JUT-011	1	NA	1	NA
FBtr0075171	FBgn0052190	Head	SLA-001	2	NA	1	NA
FBtr0075171	FBgn0052190	Head	SLA-001	2	NA	1	NA
FBtr0331920	FBgn0261456	Ovary	AKA-017	2	NA	1	NA
FBtr0333134	FBgn0035477	Head	TOM-007	3	NA	1	NA
FBtr0333134	FBgn0035477	Head	TOM-007	10	NA	1	9
FBtr0333134	FBgn0035477	Head	TOM-007	3	NA	1	NA
FBtr0080252	FBgn0015400	Head	AKA-017	20	12	1	5
FBtr0072578	FBgn0000575	Gut	JUT-011	1	NA	1	NA
FBtr0070950	FBgn0028360	Head	JUT-011	20	NA	1	NA
FBtr0070950	FBgn0028360	Head	JUT-011	20	NA	1	NA
FBtr0083735	FBgn0051475	Head	AKA-017	2	NA	1	NA
FBtr0332539	FBgn0051475	Head	AKA-017	2	NA	1	NA
FBtr0113067	FBgn0033639	Gut	MUN-016	2	NA	1	NA
FBtr0113067	FBgn0033639	Gut	MUN-016	1	NA	1	NA
FBtr0087315	FBgn0265991	Head	SLA-001	1	NA	1	NA
FBtr0111048	FBgn0265991	Head	SLA-001	1	NA	1	NA
FBtr0087315	FBgn0265991	Head	SLA-001	1	NA	1	NA
FBtr0340488	FBgn0265630	Gut	JUT-011	2	NA	1	NA
FBtr0309202	FBgn0013995	Ovary	MUN-016	1	NA	1	NA
FBtr0303080	FBgn0261698	Ovary	TOM-007	20	2	1	7
FBtr0334862	FBgn0264894	Ovary	TOM-007	1	NA	1	NA
FBtr0334862	FBgn0264894	Ovary	TOM-007	20	NA	1	7
FBtr0334862	FBgn0264894	Ovary	TOM-007	20	NA	1	NA
FBtr0334862	FBgn0264894	Ovary	TOM-007	20	NA	1	NA
FBtr0334862	FBgn0264894	Ovary	TOM-007	20	NA	1	NA
FBtr0334862	FBgn0264894	Ovary	TOM-007	20	3	1	13
FBtr0082396	FBgn0037906	Gut	TOM-007	2	NA	1	NA
FBtr0086566	FBgn0034408	Ovary	AKA-017	3	NA	1	NA
FBtr0330045	FBgn0038233	Head	AKA-017	20	NA	1	4
FBtr0301313	FBgn0265991	Ovary	JUT-011	1	NA	1	NA
FBtr0087315	FBgn0265991	Ovary	JUT-011	1	NA	1	NA
FBtr0332232	FBgn0262475	Gut	TOM-007	9	NA	1	NA
FBtr0332232	FBgn0262475	Gut	TOM-007	20	7	1	NA
FBtr0332232	FBgn0262475	Gut	TOM-007	1	NA	1	NA
FBtr0332233	FBgn0262475	Gut	TOM-007	9	NA	1	NA
FBtr0332233	FBgn0262475	Gut	TOM-007	20	7	1	NA
FBtr0332233	FBgn0262475	Gut	TOM-007	1	NA	1	NA
FBtr0080161	FBgn0032330	Head	TOM-007	3	NA	1	NA
FBtr0080161	FBgn0032330	Head	TOM-007	20	4	1	16
FBtr0087601	FBgn0040752	Gut	JUT-011	20	15	1	NA
FBtr0087601	FBgn0040752	Gut	JUT-011	20	5	1	10
FBtr0087601	FBgn0040752	Gut	JUT-011	20	8	1	10
FBtr0087601	FBgn0040752	Gut	JUT-011	20	8	1	13
FBtr0075705	FBgn0013263	Head	SLA-001	20	NA	1	2
FBtr0075705	FBgn0013263	Head	SLA-001	1	NA	1	NA
FBtr0333046	FBgn0013263	Head	SLA-001	20	NA	1	2
FBtr0333046	FBgn0013263	Head	SLA-001	1	NA	1	NA
FBtr0089052	FBgn0002930	Head	JUT-011	8	NA	1	8
FBtr0073841	FBgn0001612	Ovary	SLA-001	20	NA	1	17
FBtr0346278	FBgn0263705	Head	AKA-017	20	NA	1	NA
FBtr0340540	FBgn0004394	Gut	AKA-017	20	11	1	NA
FBtr0309251	FBgn0030087	Ovary	AKA-017	1	NA	1	NA
FBtr0309250	FBgn0030087	Ovary	AKA-017	1	NA	1	NA
FBtr0072129	FBgn0011236	Gut	MUN-016	11	NA	1	3
FBtr0343314	FBgn0004101	Gut	MUN-016	20	3	1	14
FBtr0331920	FBgn0261456	Gut	MUN-016	2	NA	1	NA
FBtr0343556	FBgn0266101	Head	TOM-007	1	NA	1	NA
FBtr0343556	FBgn0266101	Head	TOM-007	20	6	1	7
FBtr0343556	FBgn0266101	Head	TOM-007	20	4	1	9
FBtr0343556	FBgn0266101	Head	TOM-007	20	3	1	8
FBtr0310443	FBgn0026878	Ovary	TOM-007	1	NA	1	NA
FBtr0310443	FBgn0026878	Ovary	TOM-007	14	NA	1	9
FBtr0075330	FBgn0036668	Ovary	AKA-017	1	NA	1	NA
FBtr0075330	FBgn0036668	Ovary	AKA-017	1	NA	1	NA
FBtr0075330	FBgn0036668	Ovary	AKA-017	11	NA	1	NA
FBtr0075330	FBgn0036668	Ovary	AKA-017	4	NA	1	NA
FBtr0088487	FBgn0033448	Head	JUT-011	20	2	1	4
FBtr0299789	FBgn0259227	Gut	JUT-011	1	NA	1	NA
FBtr0303454	FBgn0004369	Gut	JUT-011	20	NA	1	NA
FBtr0303454	FBgn0004369	Gut	JUT-011	1	NA	1	NA
FBtr0075855	FBgn0036360	Head	SLA-001	1	NA	1	NA
FBtr0345638	FBgn0051908	Gut	JUT-011	11	NA	1	NA
FBtr0305134	FBgn0004198	Head	SLA-001	1	NA	1	NA
FBtr0077633	FBgn0041111	Ovary	MUN-016	1	NA	1	NA
FBtr0301040	FBgn0052982	Gut	TOM-007	20	2	1	NA
FBtr0301040	FBgn0052982	Gut	TOM-007	20	2	1	NA
FBtr0301040	FBgn0052982	Gut	TOM-007	20	2	1	NA
FBtr0305354	FBgn0262617	Gut	TOM-007	1	NA	1	NA
FBtr0306240	FBgn0016081	Gut	SLA-001	20	2	1	6
FBtr0333858	FBgn0016081	Gut	SLA-001	20	2	1	6
FBtr0301435	FBgn0016081	Gut	SLA-001	20	2	1	6
FBtr0073454	FBgn0000499	Head	JUT-011	20	NA	1	NA
FBtr0073454	FBgn0000499	Head	JUT-011	10	NA	1	NA
FBtr0344714	FBgn0260386	Head	JUT-011	1	NA	1	NA
FBtr0344714	FBgn0260386	Head	JUT-011	1	NA	1	NA
FBtr0332652	FBgn0036134	Gut	JUT-011	20	17	1	16
FBtr0344555	FBgn0029761	Head	SLA-001	1	NA	1	NA
FBtr0331602	FBgn0029761	Head	SLA-001	1	NA	1	NA
FBtr0089052	FBgn0002930	Gut	JUT-011	8	NA	1	8
FBtr0089052	FBgn0002930	Ovary	JUT-011	8	NA	1	8
FBtr0306252	FBgn0265298	Gut	MUN-016	2	NA	1	NA
FBtr0306252	FBgn0265298	Gut	MUN-016	1	NA	1	NA
FBtr0302910	FBgn0265298	Gut	MUN-016	2	NA	1	NA
FBtr0302910	FBgn0265298	Gut	MUN-016	1	NA	1	NA
FBtr0306241	FBgn0016081	Ovary	AKA-017	20	2	1	9
FBtr0306241	FBgn0016081	Ovary	AKA-017	19	2	1	4
FBtr0343353	FBgn0030034	Head	TOM-007	20	NA	1	17
FBtr0343353	FBgn0030034	Head	TOM-007	20	NA	1	NA
FBtr0343353	FBgn0030034	Head	TOM-007	1	NA	1	NA
FBtr0299789	FBgn0259227	Gut	AKA-017	1	NA	1	NA
FBtr0330085	FBgn0045862	Gut	JUT-011	1	NA	1	NA
FBtr0330085	FBgn0045862	Gut	JUT-011	20	4	1	3
FBtr0085221	FBgn0045862	Gut	JUT-011	1	NA	1	NA
FBtr0085221	FBgn0045862	Gut	JUT-011	20	4	1	3
FBtr0083218	FBgn0038391	Gut	JUT-011	1	NA	1	NA
FBtr0083218	FBgn0038391	Gut	JUT-011	20	4	1	2
FBtr0083218	FBgn0038391	Gut	JUT-011	18	NA	1	NA
FBtr0087315	FBgn0265991	Ovary	MUN-016	1	NA	1	NA
FBtr0340489	FBgn0265630	Head	JUT-011	2	NA	1	NA
FBtr0340488	FBgn0265630	Head	JUT-011	2	NA	1	NA
FBtr0083993	FBgn0038829	Head	AKA-017	20	9	1	2
FBtr0075580	FBgn0041160	Gut	TOM-007	20	6	1	16
FBtr0088487	FBgn0033448	Head	SLA-001	20	2	1	4
FBtr0344714	FBgn0260386	Head	AKA-017	1	NA	1	NA
FBtr0344714	FBgn0260386	Head	AKA-017	1	NA	1	NA
FBtr0342952	FBgn0052772	Gut	MUN-016	2	NA	1	NA
FBtr0304887	FBgn0000286	Gut	JUT-011	20	3	1	NA
FBtr0304887	FBgn0000286	Gut	JUT-011	20	3	1	NA
FBtr0300277	FBgn0034187	Ovary	TOM-007	1	NA	1	NA
FBtr0300277	FBgn0034187	Ovary	TOM-007	1	NA	1	NA
FBtr0300277	FBgn0034187	Ovary	TOM-007	1	NA	1	NA
FBtr0300277	FBgn0034187	Ovary	TOM-007	20	NA	1	5
FBtr0300277	FBgn0034187	Ovary	TOM-007	7	4	1	NA
FBtr0300276	FBgn0034187	Ovary	TOM-007	1	NA	1	NA
FBtr0300276	FBgn0034187	Ovary	TOM-007	1	NA	1	NA
FBtr0300276	FBgn0034187	Ovary	TOM-007	1	NA	1	NA
FBtr0300276	FBgn0034187	Ovary	TOM-007	20	NA	1	5
FBtr0300276	FBgn0034187	Ovary	TOM-007	7	4	1	NA
FBtr0070396	FBgn0000810	Gut	TOM-007	1	NA	1	NA
FBtr0334742	FBgn0037326	Head	SLA-001	1	NA	1	NA
FBtr0302964	FBgn0030121	Head	SLA-001	3	3	1	NA
FBtr0302964	FBgn0030121	Head	SLA-001	3	3	1	NA
FBtr0302964	FBgn0030121	Head	SLA-001	3	NA	1	NA
FBtr0302964	FBgn0030121	Head	SLA-001	20	20	1	11
FBtr0302964	FBgn0030121	Head	SLA-001	9	NA	1	NA
FBtr0302964	FBgn0030121	Head	SLA-001	3	NA	1	NA
FBtr0330085	FBgn0045862	Head	JUT-011	1	NA	1	NA
FBtr0330085	FBgn0045862	Head	JUT-011	20	4	1	3
FBtr0086567	FBgn0034408	Head	JUT-011	20	3	3	1
FBtr0080200	FBgn0032348	Ovary	MUN-016	4	NA	1	NA
FBtr0080200	FBgn0032348	Ovary	MUN-016	20	7	1	NA
FBtr0073163	FBgn0035477	Head	AKA-017	3	NA	1	NA
FBtr0073163	FBgn0035477	Head	AKA-017	10	NA	1	9
FBtr0073163	FBgn0035477	Head	AKA-017	3	NA	1	NA
FBtr0333134	FBgn0035477	Head	AKA-017	3	NA	1	NA
FBtr0333134	FBgn0035477	Head	AKA-017	10	NA	1	9
FBtr0333134	FBgn0035477	Head	AKA-017	3	NA	1	NA
FBtr0305946	FBgn0261698	Gut	TOM-007	20	2	1	7
FBtr0331920	FBgn0261456	Ovary	SLA-001	2	NA	1	NA
FBtr0302964	FBgn0030121	Ovary	SLA-001	3	3	1	NA
FBtr0302964	FBgn0030121	Ovary	SLA-001	3	3	1	NA
FBtr0302964	FBgn0030121	Ovary	SLA-001	3	NA	1	NA
FBtr0302964	FBgn0030121	Ovary	SLA-001	20	20	1	11
FBtr0302964	FBgn0030121	Ovary	SLA-001	9	NA	1	NA
FBtr0302964	FBgn0030121	Ovary	SLA-001	3	NA	1	NA
FBtr0290300	FBgn0034408	Ovary	MUN-016	3	NA	1	NA
FBtr0307898	FBgn0030412	Gut	TOM-007	3	NA	1	NA
FBtr0307898	FBgn0030412	Gut	TOM-007	19	NA	1	NA
FBtr0082116	FBgn0037705	Head	TOM-007	1	NA	1	NA
FBtr0082116	FBgn0037705	Head	TOM-007	2	NA	1	NA
FBtr0082116	FBgn0037705	Head	TOM-007	2	NA	1	NA
FBtr0081614	FBgn0261238	Gut	MUN-016	2	NA	1	NA
FBtr0081614	FBgn0261238	Gut	MUN-016	1	NA	1	NA
FBtr0081614	FBgn0261238	Gut	MUN-016	4	NA	1	NA
FBtr0304685	FBgn0261262	Head	TOM-007	6	NA	1	NA
FBtr0304685	FBgn0261262	Head	TOM-007	6	NA	1	NA
FBtr0083553	FBgn0042693	Gut	AKA-017	1	NA	1	NA
FBtr0083553	FBgn0042693	Gut	AKA-017	1	NA	1	NA
FBtr0083553	FBgn0042693	Gut	AKA-017	1	NA	1	NA
FBtr0336467	FBgn0042693	Gut	AKA-017	1	NA	1	NA
FBtr0336467	FBgn0042693	Gut	AKA-017	1	NA	1	NA
FBtr0336467	FBgn0042693	Gut	AKA-017	1	NA	1	NA
FBtr0336467	FBgn0042693	Gut	AKA-017	1	NA	1	NA
FBtr0336467	FBgn0042693	Gut	AKA-017	1	NA	1	NA
FBtr0336467	FBgn0042693	Gut	AKA-017	1	NA	1	NA
FBtr0299789	FBgn0259227	Ovary	TOM-007	1	NA	1	NA
FBtr0073387	FBgn0030251	Head	SLA-001	18	14	2	1
FBtr0073387	FBgn0030251	Head	SLA-001	7	NA	2	1
FBtr0073387	FBgn0030251	Head	SLA-001	20	NA	2	1
FBtr0073387	FBgn0030251	Head	SLA-001	18	14	2	1
FBtr0073387	FBgn0030251	Head	SLA-001	7	NA	2	1
FBtr0073387	FBgn0030251	Head	SLA-001	20	NA	2	1
FBtr0306151	FBgn0063485	Head	JUT-011	3	NA	1	NA
FBtr0306151	FBgn0063485	Head	JUT-011	20	16	1	NA
FBtr0306151	FBgn0063485	Head	JUT-011	1	NA	1	NA
FBtr0346281	FBgn0052642	Ovary	MUN-016	20	NA	1	NA
FBtr0346281	FBgn0052642	Ovary	MUN-016	20	NA	1	NA
FBtr0346281	FBgn0052642	Ovary	MUN-016	20	NA	1	NA
FBtr0332398	FBgn0029798	Ovary	TOM-007	20	NA	1	19
FBtr0332398	FBgn0029798	Ovary	TOM-007	20	NA	1	NA
FBtr0332398	FBgn0029798	Ovary	TOM-007	20	NA	1	NA
FBtr0302330	FBgn0023441	Head	AKA-017	1	NA	1	NA
FBtr0302330	FBgn0023441	Head	AKA-017	1	NA	1	NA
FBtr0302651	FBgn0261547	Ovary	SLA-001	1	NA	1	NA
FBtr0100460	FBgn0262114	Gut	TOM-007	1	NA	1	NA
FBtr0100460	FBgn0262114	Gut	TOM-007	1	NA	1	NA
FBtr0302964	FBgn0030121	Gut	TOM-007	2	NA	1	NA
FBtr0302964	FBgn0030121	Gut	TOM-007	2	NA	1	NA
FBtr0302964	FBgn0030121	Gut	TOM-007	1	NA	1	NA
FBtr0302964	FBgn0030121	Gut	TOM-007	4	NA	1	NA
FBtr0302964	FBgn0030121	Gut	TOM-007	20	NA	1	NA
FBtr0302964	FBgn0030121	Gut	TOM-007	20	NA	1	NA
FBtr0302964	FBgn0030121	Gut	TOM-007	10	NA	1	NA
FBtr0302964	FBgn0030121	Gut	TOM-007	2	NA	1	NA
FBtr0089052	FBgn0002930	Gut	MUN-016	8	NA	1	8
FBtr0070266	FBgn0283451	Ovary	JUT-011	2	NA	1	NA
FBtr0070266	FBgn0283451	Ovary	JUT-011	20	5	1	NA
FBtr0078061	FBgn0031257	Head	MUN-016	20	6	1	16
FBtr0331230	FBgn0031257	Head	MUN-016	20	6	1	16
FBtr0089261	FBgn0278608	Gut	TOM-007	20	NA	1	13
FBtr0089263	FBgn0278608	Gut	TOM-007	20	NA	1	13
FBtr0089261	FBgn0278608	Gut	TOM-007	20	NA	1	13
FBtr0089261	FBgn0278608	Gut	TOM-007	20	NA	1	13
FBtr0113106	FBgn0034720	Head	SLA-001	1	NA	1	NA
FBtr0342990	FBgn0034720	Head	SLA-001	1	NA	1	NA
FBtr0113106	FBgn0034720	Head	SLA-001	1	NA	1	NA
FBtr0346819	FBgn0037098	Gut	AKA-017	1	NA	1	NA
FBtr0346819	FBgn0037098	Gut	AKA-017	1	NA	1	NA
FBtr0088487	FBgn0033448	Ovary	AKA-017	20	2	1	4
FBtr0333927	FBgn0083963	Head	TOM-007	20	9	1	3
FBtr0346281	FBgn0052642	Gut	SLA-001	20	NA	1	NA
FBtr0346281	FBgn0052642	Gut	SLA-001	20	NA	1	NA
FBtr0346281	FBgn0052642	Gut	SLA-001	20	NA	1	NA
FBtr0346281	FBgn0052642	Gut	SLA-001	20	NA	1	NA
FBtr0346281	FBgn0052642	Gut	SLA-001	20	NA	1	NA
FBtr0346281	FBgn0052642	Gut	SLA-001	20	NA	1	NA
FBtr0346281	FBgn0052642	Gut	SLA-001	20	NA	1	NA
FBtr0346281	FBgn0052642	Gut	SLA-001	20	NA	1	NA
FBtr0346281	FBgn0052642	Gut	SLA-001	20	NA	1	NA
FBtr0089361	FBgn0283521	Ovary	TOM-007	20	5	1	10
FBtr0300123	FBgn0014135	Head	AKA-017	2	NA	1	NA
FBtr0300123	FBgn0014135	Head	AKA-017	9	NA	1	9
FBtr0085355	FBgn0039601	Ovary	MUN-016	2	NA	1	NA
FBtr0346278	FBgn0263705	Head	MUN-016	20	NA	1	NA
FBtr0071792	FBgn0243516	Ovary	JUT-011	4	NA	1	NA
FBtr0346608	FBgn0003464	Head	AKA-017	5	NA	1	NA
FBtr0346608	FBgn0003464	Head	AKA-017	20	NA	1	NA
FBtr0346608	FBgn0003464	Head	AKA-017	20	NA	2	1
FBtr0089678	FBgn0003464	Head	AKA-017	5	NA	1	NA
FBtr0089678	FBgn0003464	Head	AKA-017	20	NA	1	NA
FBtr0089678	FBgn0003464	Head	AKA-017	20	NA	2	1
FBtr0071556	FBgn0008636	Head	AKA-017	1	NA	1	NA
FBtr0085718	FBgn0039807	Head	SLA-001	2	NA	1	NA
FBtr0334676	FBgn0261238	Gut	SLA-001	2	NA	1	NA
FBtr0334676	FBgn0261238	Gut	SLA-001	1	NA	1	NA
FBtr0334676	FBgn0261238	Gut	SLA-001	4	NA	1	NA
FBtr0339612	FBgn0039419	Ovary	TOM-007	20	5	1	NA
FBtr0299617	FBgn0259167	Head	MUN-016	20	NA	2	1
FBtr0299616	FBgn0259167	Head	MUN-016	20	NA	2	1
FBtr0072601	FBgn0035160	Ovary	JUT-011	9	2	1	7
FBtr0072601	FBgn0035160	Ovary	JUT-011	20	5	1	NA
FBtr0072601	FBgn0035160	Ovary	JUT-011	1	NA	1	NA
FBtr0452132	FBgn0284232	Gut	JUT-011	1	NA	1	NA
FBtr0452132	FBgn0284232	Gut	JUT-011	1	NA	1	NA
FBtr0452132	FBgn0284232	Gut	JUT-011	1	NA	1	NA
FBtr0452132	FBgn0284232	Gut	JUT-011	5	NA	1	NA
FBtr0073163	FBgn0035477	Head	MUN-016	3	NA	1	NA
FBtr0073163	FBgn0035477	Head	MUN-016	10	NA	1	9
FBtr0073163	FBgn0035477	Head	MUN-016	3	NA	1	NA
FBtr0083795	FBgn0014135	Gut	TOM-007	20	5	1	2
FBtr0083795	FBgn0014135	Gut	TOM-007	2	NA	1	NA
FBtr0083795	FBgn0014135	Gut	TOM-007	9	NA	1	9
FBtr0300123	FBgn0014135	Gut	TOM-007	20	5	1	2
FBtr0300123	FBgn0014135	Gut	TOM-007	2	NA	1	NA
FBtr0300123	FBgn0014135	Gut	TOM-007	9	NA	1	9
FBtr0309250	FBgn0030087	Ovary	SLA-001	1	NA	1	NA
FBtr0309251	FBgn0030087	Ovary	SLA-001	1	NA	1	NA
FBtr0331941	FBgn0003175	Head	AKA-017	1	NA	1	NA
FBtr0080200	FBgn0032348	Gut	TOM-007	4	NA	1	NA
FBtr0080200	FBgn0032348	Gut	TOM-007	20	7	1	NA
FBtr0334498	FBgn0004882	Ovary	JUT-011	1	NA	1	NA
FBtr0334498	FBgn0004882	Ovary	JUT-011	20	NA	1	4
FBtr0075171	FBgn0052190	Gut	SLA-001	2	NA	1	NA
FBtr0075171	FBgn0052190	Gut	SLA-001	2	NA	1	NA
FBtr0339815	FBgn0029939	Ovary	JUT-011	1	NA	1	NA
FBtr0335473	FBgn0020309	Ovary	TOM-007	1	NA	1	NA
FBtr0335473	FBgn0020309	Ovary	TOM-007	1	NA	1	NA
FBtr0335473	FBgn0020309	Ovary	TOM-007	20	8	1	NA
FBtr0335473	FBgn0020309	Ovary	TOM-007	3	NA	1	NA
FBtr0343560	FBgn0266101	Head	MUN-016	1	NA	1	NA
FBtr0343560	FBgn0266101	Head	MUN-016	20	6	1	7
FBtr0343560	FBgn0266101	Head	MUN-016	20	4	1	9
FBtr0343560	FBgn0266101	Head	MUN-016	20	3	1	8
FBtr0085718	FBgn0039807	Head	AKA-017	2	NA	1	NA
FBtr0344316	FBgn0013995	Head	TOM-007	1	NA	1	NA
FBtr0344316	FBgn0013995	Head	TOM-007	1	NA	1	NA
FBtr0309205	FBgn0013995	Head	TOM-007	1	NA	1	NA
FBtr0309205	FBgn0013995	Head	TOM-007	1	NA	1	NA
FBtr0340082	FBgn0003575	Gut	SLA-001	20	NA	1	NA
FBtr0081283	FBgn0032796	Ovary	JUT-011	3	NA	1	NA
FBtr0329963	FBgn0032796	Ovary	JUT-011	3	NA	1	NA
FBtr0081282	FBgn0032796	Ovary	JUT-011	3	NA	1	NA
FBtr0072578	FBgn0000575	Ovary	JUT-011	1	NA	1	NA
FBtr0299789	FBgn0259227	Gut	MUN-016	1	NA	1	NA
FBtr0080188	FBgn0011676	Head	AKA-017	1	NA	1	NA
FBtr0085355	FBgn0039601	Gut	TOM-007	2	NA	1	NA
FBtr0330241	FBgn0259145	Head	TOM-007	1	NA	1	NA
FBtr0305946	FBgn0261698	Gut	JUT-011	20	4	1	2
FBtr0330267	FBgn0263993	Ovary	TOM-007	1	NA	1	NA
FBtr0330267	FBgn0263993	Ovary	TOM-007	1	NA	1	NA
FBtr0335473	FBgn0020309	Ovary	SLA-001	1	NA	1	NA
FBtr0335473	FBgn0020309	Ovary	SLA-001	1	NA	1	NA
FBtr0335473	FBgn0020309	Ovary	SLA-001	20	8	1	NA
FBtr0335473	FBgn0020309	Ovary	SLA-001	3	NA	1	NA
FBtr0080260	FBgn0020309	Ovary	SLA-001	1	NA	1	NA
FBtr0080260	FBgn0020309	Ovary	SLA-001	1	NA	1	NA
FBtr0080260	FBgn0020309	Ovary	SLA-001	20	8	1	NA
FBtr0080260	FBgn0020309	Ovary	SLA-001	3	NA	1	NA
FBtr0080263	FBgn0020309	Ovary	SLA-001	1	NA	1	NA
FBtr0080263	FBgn0020309	Ovary	SLA-001	1	NA	1	NA
FBtr0080263	FBgn0020309	Ovary	SLA-001	20	8	1	NA
FBtr0080263	FBgn0020309	Ovary	SLA-001	3	NA	1	NA
FBtr0080260	FBgn0020309	Ovary	SLA-001	1	NA	1	NA
FBtr0080260	FBgn0020309	Ovary	SLA-001	1	NA	1	NA
FBtr0080260	FBgn0020309	Ovary	SLA-001	20	8	1	NA
FBtr0080260	FBgn0020309	Ovary	SLA-001	3	NA	1	NA
FBtr0082116	FBgn0037705	Ovary	AKA-017	1	NA	1	NA
FBtr0082116	FBgn0037705	Ovary	AKA-017	2	NA	1	NA
FBtr0082116	FBgn0037705	Ovary	AKA-017	2	NA	1	NA
FBtr0082117	FBgn0037705	Ovary	AKA-017	1	NA	1	NA
FBtr0082117	FBgn0037705	Ovary	AKA-017	2	NA	1	NA
FBtr0082117	FBgn0037705	Ovary	AKA-017	2	NA	1	NA
FBtr0074634	FBgn0283473	Ovary	MUN-016	5	2	1	NA
FBtr0332398	FBgn0029798	Ovary	AKA-017	20	NA	1	NA
FBtr0332398	FBgn0029798	Ovary	AKA-017	20	NA	1	NA
FBtr0332398	FBgn0029798	Ovary	AKA-017	20	NA	1	NA
FBtr0303434	FBgn0261854	Gut	JUT-011	2	NA	1	NA
FBtr0303434	FBgn0261854	Gut	JUT-011	1	NA	1	NA
FBtr0303434	FBgn0261854	Gut	JUT-011	2	NA	1	NA
FBtr0303434	FBgn0261854	Gut	JUT-011	2	NA	1	NA
FBtr0303434	FBgn0261854	Gut	JUT-011	1	NA	1	NA
FBtr0303434	FBgn0261854	Gut	JUT-011	2	NA	1	NA
FBtr0303434	FBgn0261854	Gut	JUT-011	2	NA	1	NA
FBtr0303434	FBgn0261854	Gut	JUT-011	1	NA	1	NA
FBtr0303434	FBgn0261854	Gut	JUT-011	2	NA	1	NA
FBtr0303434	FBgn0261854	Gut	JUT-011	2	NA	1	NA
FBtr0303434	FBgn0261854	Gut	JUT-011	1	NA	1	NA
FBtr0303434	FBgn0261854	Gut	JUT-011	2	NA	1	NA
FBtr0345644	FBgn0085415	Gut	JUT-011	20	NA	1	NA
FBtr0308652	FBgn0025639	Ovary	MUN-016	1	NA	1	NA
FBtr0070151	FBgn0025639	Ovary	MUN-016	1	NA	1	NA
FBtr0088243	FBgn0050015	Ovary	MUN-016	20	12	1	9
FBtr0340489	FBgn0265630	Head	TOM-007	2	NA	1	NA
FBtr0071846	FBgn0034720	Ovary	JUT-011	2	NA	1	NA
FBtr0071846	FBgn0034720	Ovary	JUT-011	40	NA	1	2
FBtr0342990	FBgn0034720	Ovary	JUT-011	1	NA	1	NA
FBtr0342990	FBgn0034720	Ovary	JUT-011	20	NA	1	2
FBtr0085718	FBgn0039807	Head	JUT-011	2	NA	1	NA
FBtr0085355	FBgn0039601	Head	JUT-011	1	NA	1	NA
FBtr0077557	FBgn0002985	Head	MUN-016	7	NA	1	NA
FBtr0084000	FBgn0013995	Head	SLA-001	1	NA	1	NA
FBtr0344316	FBgn0013995	Head	SLA-001	1	NA	1	NA
FBtr0114589	FBgn0010280	Head	JUT-011	20	13	1	9
FBtr0080315	FBgn0042127	Gut	JUT-011	2	NA	1	NA
FBtr0080315	FBgn0042127	Gut	JUT-011	4	4	1	NA
FBtr0080315	FBgn0042127	Gut	JUT-011	4	NA	1	NA
FBtr0080315	FBgn0042127	Gut	JUT-011	1	NA	1	NA
FBtr0346819	FBgn0037098	Gut	SLA-001	1	NA	1	NA
FBtr0346819	FBgn0037098	Gut	SLA-001	1	NA	1	NA
FBtr0346818	FBgn0037098	Gut	SLA-001	1	NA	1	NA
FBtr0346818	FBgn0037098	Gut	SLA-001	1	NA	1	NA
FBtr0080189	FBgn0051869	Head	TOM-007	1	NA	1	NA
FBtr0333134	FBgn0035477	Head	JUT-011	3	NA	1	NA
FBtr0333134	FBgn0035477	Head	JUT-011	10	NA	1	9
FBtr0333134	FBgn0035477	Head	JUT-011	3	NA	1	NA
FBtr0333266	FBgn0052479	Gut	MUN-016	1	NA	1	NA
FBtr0074634	FBgn0283473	Ovary	AKA-017	5	2	1	NA
FBtr0345028	FBgn0035388	Head	JUT-011	1	NA	1	NA
FBtr0345028	FBgn0035388	Head	JUT-011	1	NA	1	NA
FBtr0308254	FBgn0266557	Head	JUT-011	1	NA	1	NA
FBtr0303781	FBgn0036923	Ovary	AKA-017	1	NA	1	NA
FBtr0074920	FBgn0014037	Head	TOM-007	2	NA	1	NA
FBtr0074920	FBgn0014037	Head	TOM-007	18	8	1	5
FBtr0331744	FBgn0024251	Ovary	MUN-016	3	NA	1	NA
FBtr0303781	FBgn0036923	Ovary	JUT-011	1	NA	1	NA
FBtr0073187	FBgn0052264	Head	MUN-016	4	NA	1	NA
FBtr0347540	FBgn0037098	Gut	TOM-007	1	NA	1	NA
FBtr0347540	FBgn0037098	Gut	TOM-007	1	NA	1	NA
FBtr0346819	FBgn0037098	Gut	TOM-007	1	NA	1	NA
FBtr0346819	FBgn0037098	Gut	TOM-007	1	NA	1	NA
FBtr0075171	FBgn0052190	Ovary	TOM-007	2	NA	1	NA
FBtr0075171	FBgn0052190	Ovary	TOM-007	2	NA	1	NA
FBtr0082117	FBgn0037705	Head	JUT-011	2	NA	1	NA
FBtr0305134	FBgn0004198	Head	AKA-017	1	NA	1	NA
FBtr0301347	FBgn0014859	Head	TOM-007	20	2	1	NA
FBtr0301347	FBgn0014859	Head	TOM-007	20	NA	1	NA
FBtr0307306	FBgn0263108	Gut	MUN-016	20	NA	1	NA
FBtr0307306	FBgn0263108	Gut	MUN-016	20	5	1	NA
FBtr0074634	FBgn0283473	Head	AKA-017	5	2	1	NA
FBtr0073454	FBgn0000499	Gut	AKA-017	20	NA	1	NA
FBtr0073454	FBgn0000499	Gut	AKA-017	10	NA	1	NA
FBtr0303434	FBgn0261854	Head	JUT-011	2	NA	1	NA
FBtr0303434	FBgn0261854	Head	JUT-011	1	NA	1	NA
FBtr0303434	FBgn0261854	Head	JUT-011	2	NA	1	NA
FBtr0306742	FBgn0024321	Head	SLA-001	20	9	1	5
FBtr0076369	FBgn0015618	Ovary	JUT-011	20	8	1	6
FBtr0076369	FBgn0015618	Ovary	JUT-011	20	6	1	NA
FBtr0343556	FBgn0266101	Ovary	AKA-017	1	NA	1	NA
FBtr0343556	FBgn0266101	Ovary	AKA-017	20	6	1	7
FBtr0302651	FBgn0261547	Gut	JUT-011	1	NA	1	NA
FBtr0071068	FBgn0004198	Ovary	AKA-017	1	NA	1	NA
FBtr0071068	FBgn0004198	Ovary	AKA-017	2	NA	1	NA
FBtr0071068	FBgn0004198	Ovary	AKA-017	1	NA	1	NA
FBtr0113106	FBgn0034720	Head	MUN-016	1	NA	1	NA
FBtr0113106	FBgn0034720	Head	MUN-016	1	NA	1	NA
FBtr0113106	FBgn0034720	Head	MUN-016	1	NA	1	NA
FBtr0083914	FBgn0001169	Gut	AKA-017	1	NA	1	NA
FBtr0083914	FBgn0001169	Gut	AKA-017	2	NA	1	NA
FBtr0083914	FBgn0001169	Gut	AKA-017	1	NA	1	NA
FBtr0083917	FBgn0001169	Gut	AKA-017	1	NA	1	NA
FBtr0083917	FBgn0001169	Gut	AKA-017	2	NA	1	NA
FBtr0083917	FBgn0001169	Gut	AKA-017	1	NA	1	NA
FBtr0083915	FBgn0001169	Gut	AKA-017	1	NA	1	NA
FBtr0083915	FBgn0001169	Gut	AKA-017	2	NA	1	NA
FBtr0083915	FBgn0001169	Gut	AKA-017	1	NA	1	NA
FBtr0070204	FBgn0040357	Ovary	JUT-011	1	NA	1	NA
FBtr0333331	FBgn0041210	Gut	JUT-011	20	NA	1	17
FBtr0339549	FBgn0020445	Ovary	SLA-001	1	NA	1	NA
FBtr0343825	FBgn0032688	Ovary	AKA-017	20	5	1	NA
FBtr0083917	FBgn0001169	Gut	MUN-016	1	NA	1	NA
FBtr0083917	FBgn0001169	Gut	MUN-016	1	NA	1	NA
FBtr0310443	FBgn0026878	Ovary	AKA-017	11	NA	1	8
FBtr0345092	FBgn0266696	Gut	TOM-007	1	NA	1	NA
FBtr0345092	FBgn0266696	Gut	TOM-007	1	NA	1	NA
FBtr0083913	FBgn0038815	Ovary	AKA-017	20	NA	1	20
FBtr0083913	FBgn0038815	Ovary	AKA-017	20	NA	1	14
FBtr0085355	FBgn0039601	Head	SLA-001	2	NA	1	NA
FBtr0074167	FBgn0260938	Head	SLA-001	1	NA	1	NA
FBtr0346819	FBgn0037098	Ovary	MUN-016	1	NA	1	NA
FBtr0346819	FBgn0037098	Ovary	MUN-016	1	NA	1	NA
FBtr0347540	FBgn0037098	Ovary	MUN-016	1	NA	1	NA
FBtr0347540	FBgn0037098	Ovary	MUN-016	1	NA	1	NA
FBtr0082206	FBgn0053208	Ovary	MUN-016	12	10	1	NA
FBtr0299789	FBgn0259227	Ovary	MUN-016	1	NA	1	NA
FBtr0299789	FBgn0259227	Ovary	MUN-016	1	NA	1	NA
FBtr0301544	FBgn0003345	Head	MUN-016	5	NA	1	5
FBtr0308131	FBgn0003345	Head	MUN-016	5	NA	1	5
FBtr0302964	FBgn0030121	Head	AKA-017	2	NA	1	NA
FBtr0302964	FBgn0030121	Head	AKA-017	2	NA	1	NA
FBtr0302964	FBgn0030121	Head	AKA-017	5	NA	1	NA
FBtr0302964	FBgn0030121	Head	AKA-017	20	NA	1	NA
FBtr0302964	FBgn0030121	Head	AKA-017	12	NA	1	NA
FBtr0302964	FBgn0030121	Head	AKA-017	14	NA	1	NA
FBtr0302964	FBgn0030121	Head	AKA-017	3	NA	1	NA
FBtr0299710	FBgn0259212	Head	AKA-017	20	4	1	14
FBtr0299710	FBgn0259212	Head	AKA-017	1	NA	1	NA
FBtr0333858	FBgn0016081	Gut	MUN-016	20	2	1	6
FBtr0083218	FBgn0038391	Gut	SLA-001	18	NA	1	NA
FBtr0083218	FBgn0038391	Gut	SLA-001	1	NA	1	NA
FBtr0083218	FBgn0038391	Gut	SLA-001	20	4	1	2
FBtr0076368	FBgn0004390	Head	JUT-011	20	NA	1	17
FBtr0076368	FBgn0004390	Head	JUT-011	20	NA	1	NA
FBtr0076368	FBgn0004390	Head	JUT-011	20	5	1	NA
FBtr0072285	FBgn0034976	Ovary	AKA-017	1	NA	1	NA
FBtr0333266	FBgn0052479	Head	AKA-017	1	NA	1	NA
FBtr0071792	FBgn0243516	Ovary	AKA-017	4	NA	1	NA
FBtr0344752	FBgn0266579	Gut	SLA-001	15	6	1	NA
FBtr0339718	FBgn0039688	Head	AKA-017	1	NA	1	NA
FBtr0339718	FBgn0039688	Head	AKA-017	20	NA	1	7
FBtr0113430	FBgn0052264	Ovary	MUN-016	4	NA	1	NA
FBtr0087315	FBgn0265991	Gut	JUT-011	1	NA	1	NA
FBtr0073798	FBgn0041210	Ovary	TOM-007	20	NA	1	13
FBtr0308576	FBgn0041210	Ovary	TOM-007	20	NA	1	13
FBtr0331744	FBgn0024251	Head	SLA-001	3	NA	1	NA
FBtr0100599	FBgn0024251	Head	SLA-001	3	NA	1	NA
FBtr0308576	FBgn0041210	Ovary	TOM-007	20	NA	1	13
FBtr0075054	FBgn0036811	Ovary	AKA-017	20	4	1	9
FBtr0080700	FBgn0004837	Ovary	JUT-011	20	2	1	11
FBtr0080700	FBgn0004837	Ovary	JUT-011	20	2	1	11
FBtr0077765	FBgn0031420	Gut	AKA-017	7	7	1	NA
FBtr0345644	FBgn0085415	Gut	MUN-016	20	14	1	12
FBtr0303562	FBgn0283451	Ovary	AKA-017	6	NA	1	NA
FBtr0080200	FBgn0032348	Head	TOM-007	4	NA	1	NA
FBtr0080200	FBgn0032348	Head	TOM-007	20	7	1	NA
FBtr0330001	FBgn0034301	Gut	AKA-017	3	NA	1	NA
FBtr0299789	FBgn0259227	Gut	TOM-007	1	NA	1	NA
FBtr0344383	FBgn0262127	Ovary	SLA-001	20	5	1	13
FBtr0344383	FBgn0262127	Ovary	SLA-001	20	NA	1	6
FBtr0075580	FBgn0041160	Ovary	JUT-011	20	NA	1	14
FBtr0089052	FBgn0002930	Head	SLA-001	8	NA	1	8
FBtr0343556	FBgn0266101	Ovary	SLA-001	1	NA	1	NA
FBtr0343556	FBgn0266101	Ovary	SLA-001	20	6	1	7
FBtr0088095	FBgn0000577	Gut	AKA-017	20	5	1	3
FBtr0301071	FBgn0036274	Head	JUT-011	5	NA	1	3
FBtr0301071	FBgn0036274	Head	JUT-011	1	NA	1	NA
FBtr0343314	FBgn0004101	Ovary	TOM-007	20	3	1	NA
FBtr0347540	FBgn0037098	Head	AKA-017	1	NA	1	NA
FBtr0347540	FBgn0037098	Head	AKA-017	1	NA	1	NA
FBtr0346819	FBgn0037098	Head	AKA-017	1	NA	1	NA
FBtr0346819	FBgn0037098	Head	AKA-017	1	NA	1	NA
FBtr0070528	FBgn0029662	Ovary	AKA-017	12	6	1	9
FBtr0070528	FBgn0029662	Ovary	AKA-017	1	NA	1	NA
FBtr0310443	FBgn0026878	Gut	TOM-007	1	NA	1	NA
FBtr0310443	FBgn0026878	Gut	TOM-007	14	NA	1	9
FBtr0330382	FBgn0039169	Gut	TOM-007	20	17	1	18
FBtr0075171	FBgn0052190	Ovary	JUT-011	2	NA	1	NA
FBtr0075171	FBgn0052190	Ovary	JUT-011	2	NA	1	NA
FBtr0300997	FBgn0052772	Gut	AKA-017	1	NA	1	NA
FBtr0299789	FBgn0259227	Head	JUT-011	1	NA	1	NA
FBtr0074884	FBgn0001324	Ovary	MUN-016	10	2	1	3
FBtr0074884	FBgn0001324	Ovary	MUN-016	2	NA	1	NA
FBtr0334498	FBgn0004882	Head	SLA-001	4	NA	1	NA
FBtr0334498	FBgn0004882	Head	SLA-001	20	NA	1	5
FBtr0081070	FBgn0032688	Ovary	SLA-001	20	5	1	NA
FBtr0343825	FBgn0032688	Ovary	SLA-001	20	5	1	NA
FBtr0301519	FBgn0261526	Gut	JUT-011	1	NA	NA	1
FBtr0301520	FBgn0261526	Gut	JUT-011	1	NA	NA	1
FBtr0087601	FBgn0040752	Ovary	MUN-016	20	10	1	NA
FBtr0087601	FBgn0040752	Ovary	MUN-016	20	5	1	10
FBtr0087601	FBgn0040752	Ovary	MUN-016	20	8	1	10
FBtr0087601	FBgn0040752	Ovary	MUN-016	20	8	1	13
FBtr0346819	FBgn0037098	Head	MUN-016	1	NA	1	NA
FBtr0346819	FBgn0037098	Head	MUN-016	1	NA	1	NA
FBtr0347540	FBgn0037098	Head	MUN-016	1	NA	1	NA
FBtr0347540	FBgn0037098	Head	MUN-016	1	NA	1	NA
FBtr0346818	FBgn0037098	Head	MUN-016	1	NA	1	NA
FBtr0346818	FBgn0037098	Head	MUN-016	1	NA	1	NA
FBtr0340631	FBgn0261570	Ovary	MUN-016	20	NA	1	NA
FBtr0340631	FBgn0261570	Ovary	MUN-016	20	NA	1	NA
FBtr0110795	FBgn0039209	Ovary	MUN-016	9	3	1	NA
FBtr0302171	FBgn0039282	Head	MUN-016	20	NA	1	NA
FBtr0345299	FBgn0039282	Head	MUN-016	20	NA	1	NA
FBtr0110916	FBgn0260003	Gut	AKA-017	1	NA	1	NA
FBtr0110916	FBgn0260003	Gut	AKA-017	1	NA	1	NA
FBtr0306615	FBgn0053558	Ovary	JUT-011	20	7	1	12
FBtr0306615	FBgn0053558	Ovary	JUT-011	1	NA	1	NA
FBtr0332942	FBgn0053558	Ovary	JUT-011	20	7	1	12
FBtr0080161	FBgn0032330	Ovary	JUT-011	20	4	1	16
FBtr0080161	FBgn0032330	Ovary	JUT-011	20	18	1	NA
FBtr0345418	FBgn0028953	Gut	MUN-016	20	20	1	NA
FBtr0331197	FBgn0032330	Ovary	JUT-011	20	4	1	16
FBtr0331197	FBgn0032330	Ovary	JUT-011	20	18	1	NA
FBtr0080200	FBgn0032348	Head	MUN-016	4	NA	1	NA
FBtr0080200	FBgn0032348	Head	MUN-016	20	7	1	NA
FBtr0310277	FBgn0262160	Gut	JUT-011	1	NA	1	NA
FBtr0336617	FBgn0262160	Gut	JUT-011	1	NA	1	NA
FBtr0074884	FBgn0001324	Head	TOM-007	10	2	1	3
FBtr0339897	FBgn0052365	Ovary	JUT-011	20	6	1	8
FBtr0085355	FBgn0039601	Gut	MUN-016	2	NA	1	NA
FBtr0080252	FBgn0015400	Head	JUT-011	20	6	1	3
FBtr0078144	FBgn0266557	Ovary	MUN-016	1	NA	1	NA
FBtr0299837	FBgn0266557	Ovary	MUN-016	1	NA	1	NA
FBtr0308253	FBgn0266557	Ovary	MUN-016	1	NA	1	NA
FBtr0344383	FBgn0262127	Gut	SLA-001	20	5	1	13
FBtr0344383	FBgn0262127	Gut	SLA-001	20	NA	1	6
FBtr0070950	FBgn0028360	Head	SLA-001	20	NA	1	NA
FBtr0070950	FBgn0028360	Head	SLA-001	20	NA	1	NA
FBtr0070680	FBgn0003053	Gut	TOM-007	20	NA	1	NA
FBtr0070680	FBgn0003053	Gut	TOM-007	1	NA	1	NA
FBtr0085355	FBgn0039601	Ovary	JUT-011	1	NA	1	NA
FBtr0077850	FBgn0000097	Head	MUN-016	5	NA	1	NA
FBtr0310443	FBgn0026878	Ovary	JUT-011	11	NA	1	8
FBtr0073153	FBgn0004875	Ovary	AKA-017	1	NA	1	NA
FBtr0073153	FBgn0004875	Ovary	AKA-017	3	NA	1	NA
FBtr0073152	FBgn0004875	Ovary	AKA-017	1	NA	1	NA
FBtr0073152	FBgn0004875	Ovary	AKA-017	3	NA	1	NA
FBtr0309697	FBgn0263560	Ovary	AKA-017	1	NA	1	NA
FBtr0088487	FBgn0033448	Gut	SLA-001	20	2	1	4
FBtr0345028	FBgn0035388	Ovary	JUT-011	1	NA	1	NA
FBtr0345028	FBgn0035388	Ovary	JUT-011	1	NA	1	NA
FBtr0339154	FBgn0027575	Ovary	JUT-011	20	14	1	NA
FBtr0084167	FBgn0027575	Ovary	JUT-011	20	14	1	NA
FBtr0072578	FBgn0000575	Head	JUT-011	1	NA	1	NA
FBtr0073573	FBgn0260780	Ovary	JUT-011	20	4	1	NA
FBtr0073573	FBgn0260780	Ovary	JUT-011	20	NA	1	NA
FBtr0073573	FBgn0260780	Ovary	JUT-011	1	NA	1	NA
FBtr0073573	FBgn0260780	Ovary	JUT-011	1	NA	1	NA
FBtr0073573	FBgn0260780	Ovary	JUT-011	1	NA	1	NA
FBtr0070969	FBgn0086693	Head	MUN-016	20	NA	1	NA
FBtr0070969	FBgn0086693	Head	MUN-016	20	NA	1	9
FBtr0310443	FBgn0026878	Head	MUN-016	11	NA	1	8
FBtr0339611	FBgn0265379	Head	AKA-017	20	2	2	1
FBtr0339611	FBgn0265379	Head	AKA-017	20	5	1	NA
FBtr0302905	FBgn0259734	Gut	MUN-016	13	NA	1	NA
FBtr0302905	FBgn0259734	Gut	MUN-016	1	NA	1	NA
FBtr0343357	FBgn0259734	Gut	MUN-016	13	NA	1	NA
FBtr0343357	FBgn0259734	Gut	MUN-016	1	NA	1	NA
FBtr0300000	FBgn0259734	Gut	MUN-016	13	NA	1	NA
FBtr0300000	FBgn0259734	Gut	MUN-016	1	NA	1	NA
FBtr0085718	FBgn0039807	Ovary	JUT-011	2	NA	1	NA
FBtr0345418	FBgn0028953	Gut	TOM-007	20	20	1	NA
FBtr0345418	FBgn0028953	Gut	TOM-007	20	20	1	NA
FBtr0080252	FBgn0015400	Head	SLA-001	20	6	1	3
FBtr0085718	FBgn0039807	Gut	TOM-007	2	NA	1	NA
FBtr0073841	FBgn0001612	Gut	TOM-007	3	NA	1	NA
FBtr0080188	FBgn0011676	Head	SLA-001	4	NA	1	NA
FBtr0302651	FBgn0261547	Gut	SLA-001	1	NA	1	NA
FBtr0075580	FBgn0041160	Head	AKA-017	20	6	1	16
FBtr0071838	FBgn0003175	Ovary	TOM-007	1	NA	1	NA
FBtr0332016	FBgn0045852	Gut	MUN-016	20	9	1	8
FBtr0305620	FBgn0045852	Gut	MUN-016	20	9	1	8
FBtr0336616	FBgn0262160	Head	MUN-016	1	NA	1	NA
FBtr0083917	FBgn0001169	Head	MUN-016	1	NA	1	NA
FBtr0083917	FBgn0001169	Head	MUN-016	1	NA	1	NA
FBtr0081282	FBgn0032796	Ovary	AKA-017	3	NA	1	NA
FBtr0329963	FBgn0032796	Ovary	AKA-017	3	NA	1	NA
FBtr0334847	FBgn0264895	Ovary	TOM-007	1	NA	1	NA
FBtr0334847	FBgn0264895	Ovary	TOM-007	1	NA	1	NA
FBtr0334847	FBgn0264895	Ovary	TOM-007	1	NA	1	NA
FBtr0334847	FBgn0264895	Ovary	TOM-007	1	NA	1	NA
FBtr0070914	FBgn0000524	Head	TOM-007	20	NA	1	10
FBtr0070914	FBgn0000524	Head	TOM-007	20	20	1	15
FBtr0070914	FBgn0000524	Head	TOM-007	18	NA	1	11
FBtr0070914	FBgn0000524	Head	TOM-007	20	NA	1	NA
FBtr0070914	FBgn0000524	Head	TOM-007	20	NA	1	NA
FBtr0344171	FBgn0283680	Head	MUN-016	20	NA	1	4
FBtr0306172	FBgn0039214	Gut	JUT-011	20	2	1	NA
FBtr0306172	FBgn0039214	Gut	JUT-011	1	NA	1	NA
FBtr0306172	FBgn0039214	Gut	JUT-011	1	NA	1	NA
FBtr0306172	FBgn0039214	Gut	JUT-011	1	NA	1	NA
FBtr0305029	FBgn0262582	Head	JUT-011	2	NA	1	NA
FBtr0306172	FBgn0039214	Head	SLA-001	20	3	1	13
FBtr0306172	FBgn0039214	Head	SLA-001	1	NA	1	NA
FBtr0306172	FBgn0039214	Head	SLA-001	1	NA	1	NA
FBtr0339135	FBgn0039214	Head	SLA-001	20	3	1	13
FBtr0339135	FBgn0039214	Head	SLA-001	1	NA	1	NA
FBtr0339135	FBgn0039214	Head	SLA-001	1	NA	1	NA
FBtr0113428	FBgn0260943	Head	MUN-016	1	NA	1	NA
FBtr0113428	FBgn0260943	Head	MUN-016	19	NA	1	3
FBtr0303434	FBgn0261854	Gut	TOM-007	2	NA	1	NA
FBtr0303434	FBgn0261854	Gut	TOM-007	1	NA	1	NA
FBtr0303434	FBgn0261854	Gut	TOM-007	2	NA	1	NA
FBtr0345028	FBgn0035388	Gut	SLA-001	1	NA	1	NA
FBtr0345028	FBgn0035388	Gut	SLA-001	1	NA	1	NA
FBtr0087601	FBgn0040752	Ovary	TOM-007	20	15	1	NA
FBtr0087601	FBgn0040752	Ovary	TOM-007	20	5	1	10
FBtr0087601	FBgn0040752	Ovary	TOM-007	20	8	1	10
FBtr0087601	FBgn0040752	Ovary	TOM-007	20	8	1	13
FBtr0299789	FBgn0259227	Head	MUN-016	1	NA	1	NA
FBtr0339154	FBgn0027575	Ovary	TOM-007	20	15	1	NA
FBtr0305333	FBgn0086358	Gut	JUT-011	20	4	1	2
FBtr0331925	FBgn0086358	Gut	JUT-011	20	4	1	2
FBtr0086516	FBgn0086358	Gut	JUT-011	20	4	1	2
FBtr0086516	FBgn0086358	Ovary	MUN-016	20	4	1	2
FBtr0300997	FBgn0052772	Gut	SLA-001	2	NA	1	NA
FBtr0290246	FBgn0051869	Ovary	JUT-011	1	NA	1	NA
FBtr0080189	FBgn0051869	Ovary	JUT-011	1	NA	1	NA
FBtr0345028	FBgn0035388	Head	MUN-016	1	NA	1	NA
FBtr0345028	FBgn0035388	Head	MUN-016	1	NA	1	NA
FBtr0299789	FBgn0259227	Ovary	SLA-001	1	NA	1	NA
FBtr0299789	FBgn0259227	Ovary	SLA-001	1	NA	1	NA
FBtr0342952	FBgn0052772	Ovary	MUN-016	2	NA	1	NA
FBtr0081324	FBgn0032817	Ovary	JUT-011	1	NA	1	NA
FBtr0073187	FBgn0052264	Gut	MUN-016	4	NA	1	NA
FBtr0113430	FBgn0052264	Gut	MUN-016	4	NA	1	NA
FBtr0343825	FBgn0032688	Ovary	TOM-007	20	5	1	NA
FBtr0081070	FBgn0032688	Ovary	TOM-007	20	5	1	NA
FBtr0113358	FBgn0050044	Head	SLA-001	20	8	1	5
FBtr0113294	FBgn0039411	Gut	MUN-016	20	4	1	5
FBtr0113294	FBgn0039411	Gut	MUN-016	1	NA	1	NA
FBtr0303781	FBgn0036923	Ovary	SLA-001	1	NA	1	NA
FBtr0071792	FBgn0243516	Gut	AKA-017	4	NA	1	NA
FBtr0302297	FBgn0243516	Gut	AKA-017	4	NA	1	NA
FBtr0334559	FBgn0051158	Gut	JUT-011	20	7	1	6
FBtr0334559	FBgn0051158	Gut	JUT-011	20	7	1	NA
FBtr0082117	FBgn0037705	Ovary	TOM-007	2	NA	1	NA
FBtr0082116	FBgn0037705	Ovary	TOM-007	2	NA	1	NA
FBtr0304697	FBgn0000662	Ovary	JUT-011	20	NA	1	NA
FBtr0304697	FBgn0000662	Ovary	JUT-011	20	NA	1	NA
FBtr0304697	FBgn0000662	Ovary	JUT-011	1	NA	1	NA
FBtr0082396	FBgn0037906	Head	AKA-017	2	NA	1	NA
FBtr0304697	FBgn0000662	Ovary	JUT-011	20	NA	1	NA
FBtr0304697	FBgn0000662	Ovary	JUT-011	20	NA	1	NA
FBtr0304697	FBgn0000662	Ovary	JUT-011	1	NA	1	NA
FBtr0333291	FBgn0010280	Gut	AKA-017	20	13	1	9
FBtr0333218	FBgn0020386	Ovary	JUT-011	20	NA	1	NA
FBtr0333218	FBgn0020386	Ovary	JUT-011	20	3	1	2
FBtr0070507	FBgn0004647	Ovary	AKA-017	20	18	1	NA
FBtr0329963	FBgn0032796	Ovary	MUN-016	3	NA	1	NA
FBtr0304110	FBgn0052218	Head	AKA-017	1	NA	1	NA
FBtr0075054	FBgn0036811	Head	TOM-007	20	4	1	9
FBtr0079139	FBgn0031740	Ovary	SLA-001	1	NA	1	NA
FBtr0079139	FBgn0031740	Ovary	SLA-001	1	NA	1	NA
FBtr0079139	FBgn0031740	Ovary	SLA-001	1	NA	1	NA
FBtr0112632	FBgn0285955	Head	TOM-007	1	NA	1	NA
FBtr0112632	FBgn0285955	Head	TOM-007	1	NA	1	NA
FBtr0112632	FBgn0285955	Head	TOM-007	1	NA	1	NA
FBtr0075285	FBgn0260943	Gut	JUT-011	1	NA	1	NA
FBtr0075285	FBgn0260943	Gut	JUT-011	19	NA	1	3
FBtr0070396	FBgn0000810	Ovary	TOM-007	1	NA	1	NA
FBtr0301670	FBgn0039282	Head	AKA-017	20	NA	1	NA
FBtr0075330	FBgn0036668	Ovary	MUN-016	1	NA	1	NA
FBtr0075330	FBgn0036668	Ovary	MUN-016	1	NA	1	NA
FBtr0075330	FBgn0036668	Ovary	MUN-016	11	NA	1	NA
FBtr0075330	FBgn0036668	Ovary	MUN-016	4	NA	1	NA
FBtr0110795	FBgn0039209	Ovary	AKA-017	20	NA	1	6
FBtr0290319	FBgn0042693	Head	AKA-017	1	NA	1	NA
FBtr0332738	FBgn0035574	Head	JUT-011	8	NA	1	NA
FBtr0332738	FBgn0035574	Head	JUT-011	20	5	1	17
FBtr0072589	FBgn0052479	Head	JUT-011	1	NA	1	NA
FBtr0072589	FBgn0052479	Head	JUT-011	20	4	1	5
FBtr0072589	FBgn0052479	Head	JUT-011	1	NA	1	NA
FBtr0342783	FBgn0020617	Head	JUT-011	7	NA	1	NA
FBtr0300123	FBgn0014135	Gut	JUT-011	20	5	1	2
FBtr0300123	FBgn0014135	Gut	JUT-011	2	NA	1	NA
FBtr0300123	FBgn0014135	Gut	JUT-011	20	5	2	1
FBtr0301040	FBgn0052982	Ovary	SLA-001	20	2	1	NA
FBtr0301040	FBgn0052982	Ovary	SLA-001	20	2	1	NA
FBtr0088487	FBgn0033448	Gut	JUT-011	20	2	1	4
FBtr0339154	FBgn0027575	Head	MUN-016	20	15	1	NA
FBtr0084167	FBgn0027575	Head	MUN-016	20	15	1	NA
FBtr0339154	FBgn0027575	Head	MUN-016	20	15	1	NA
FBtr0344146	FBgn0261509	Head	TOM-007	1	NA	1	NA
FBtr0344146	FBgn0261509	Head	TOM-007	1	NA	1	NA
FBtr0344146	FBgn0261509	Head	TOM-007	1	NA	1	NA
FBtr0344752	FBgn0266579	Head	SLA-001	15	6	1	NA
FBtr0273261	FBgn0035290	Ovary	AKA-017	20	NA	1	14
FBtr0302650	FBgn0261547	Gut	MUN-016	1	NA	1	NA
FBtr0302651	FBgn0261547	Gut	MUN-016	1	NA	1	NA
FBtr0339381	FBgn0259234	Ovary	JUT-011	1	NA	1	NA
FBtr0339381	FBgn0259234	Ovary	JUT-011	1	NA	1	NA
FBtr0075855	FBgn0036360	Head	AKA-017	1	NA	1	NA
FBtr0081283	FBgn0032796	Ovary	TOM-007	3	NA	1	NA
FBtr0329963	FBgn0032796	Ovary	TOM-007	3	NA	1	NA
FBtr0074175	FBgn0026076	Gut	SLA-001	1	NA	1	NA
FBtr0305620	FBgn0045852	Gut	SLA-001	20	9	1	8
FBtr0073145	FBgn0014388	Ovary	TOM-007	20	NA	1	NA
FBtr0073145	FBgn0014388	Ovary	TOM-007	1	NA	1	NA
FBtr0329963	FBgn0032796	Gut	TOM-007	3	NA	1	NA
FBtr0302651	FBgn0261547	Gut	TOM-007	1	NA	1	NA
FBtr0303434	FBgn0261854	Ovary	AKA-017	2	NA	1	NA
FBtr0303434	FBgn0261854	Ovary	AKA-017	1	NA	1	NA
FBtr0303434	FBgn0261854	Ovary	AKA-017	2	NA	1	NA
FBtr0303434	FBgn0261854	Ovary	AKA-017	2	NA	1	NA
FBtr0303434	FBgn0261854	Ovary	AKA-017	1	NA	1	NA
FBtr0303434	FBgn0261854	Ovary	AKA-017	2	NA	1	NA
FBtr0333829	FBgn0037525	Ovary	AKA-017	20	4	1	NA
FBtr0333829	FBgn0037525	Ovary	AKA-017	20	NA	1	NA
FBtr0303434	FBgn0261854	Head	SLA-001	2	NA	1	NA
FBtr0303434	FBgn0261854	Head	SLA-001	1	NA	1	NA
FBtr0303434	FBgn0261854	Head	SLA-001	2	NA	1	NA
FBtr0303434	FBgn0261854	Head	SLA-001	2	NA	1	NA
FBtr0303434	FBgn0261854	Head	SLA-001	1	NA	1	NA
FBtr0303434	FBgn0261854	Head	SLA-001	2	NA	1	NA
FBtr0088487	FBgn0033448	Ovary	MUN-016	20	2	1	4
FBtr0088281	FBgn0263102	Ovary	JUT-011	1	NA	1	NA
FBtr0071775	FBgn0020307	Gut	AKA-017	2	NA	1	NA
FBtr0071775	FBgn0020307	Gut	AKA-017	20	4	1	11
FBtr0310443	FBgn0026878	Gut	AKA-017	11	NA	1	8
FBtr0088030	FBgn0033652	Head	SLA-001	1	NA	1	NA
FBtr0332738	FBgn0035574	Ovary	JUT-011	8	NA	1	NA
FBtr0332738	FBgn0035574	Ovary	JUT-011	20	5	1	17
FBtr0273305	FBgn0036180	Head	AKA-017	1	NA	1	NA
FBtr0273305	FBgn0036180	Head	AKA-017	19	NA	1	4
FBtr0273306	FBgn0036180	Head	AKA-017	1	NA	1	NA
FBtr0273306	FBgn0036180	Head	AKA-017	19	NA	1	4
FBtr0113067	FBgn0033639	Head	AKA-017	1	NA	1	NA
FBtr0113067	FBgn0033639	Head	AKA-017	2	NA	1	NA
FBtr0113067	FBgn0033639	Head	AKA-017	4	NA	1	NA
FBtr0076368	FBgn0004390	Gut	AKA-017	1	NA	1	NA
FBtr0078144	FBgn0266557	Ovary	AKA-017	1	NA	1	NA
FBtr0308253	FBgn0266557	Ovary	AKA-017	1	NA	1	NA
FBtr0299837	FBgn0266557	Ovary	AKA-017	1	NA	1	NA
FBtr0308255	FBgn0266557	Ovary	AKA-017	1	NA	1	NA
FBtr0074920	FBgn0014037	Ovary	AKA-017	1	NA	1	NA
FBtr0074920	FBgn0014037	Ovary	AKA-017	18	15	1	12
FBtr0074920	FBgn0014037	Ovary	AKA-017	1	NA	1	NA
FBtr0074920	FBgn0014037	Ovary	AKA-017	1	NA	1	NA
FBtr0333218	FBgn0020386	Ovary	AKA-017	20	NA	1	NA
FBtr0333218	FBgn0020386	Ovary	AKA-017	20	3	1	2
FBtr0079335	FBgn0000320	Ovary	AKA-017	20	2	1	11
FBtr0079334	FBgn0000320	Ovary	AKA-017	20	2	1	11
FBtr0081612	FBgn0261238	Head	SLA-001	2	NA	1	NA
FBtr0081612	FBgn0261238	Head	SLA-001	1	NA	1	NA
FBtr0073387	FBgn0030251	Head	JUT-011	18	14	2	1
FBtr0073387	FBgn0030251	Head	JUT-011	7	NA	2	1
FBtr0073387	FBgn0030251	Head	JUT-011	20	NA	2	1
FBtr0080200	FBgn0032348	Head	AKA-017	4	NA	1	NA
FBtr0080200	FBgn0032348	Head	AKA-017	20	3	1	8
FBtr0340488	FBgn0265630	Gut	MUN-016	2	NA	1	NA
FBtr0302709	FBgn0261555	Head	JUT-011	1	NA	1	NA
FBtr0302710	FBgn0261555	Head	JUT-011	1	NA	1	NA
FBtr0070528	FBgn0029662	Ovary	JUT-011	12	6	1	9
FBtr0070528	FBgn0029662	Ovary	JUT-011	1	NA	1	NA
FBtr0082396	FBgn0037906	Ovary	TOM-007	2	NA	1	NA
FBtr0347540	FBgn0037098	Gut	JUT-011	1	NA	1	NA
FBtr0347540	FBgn0037098	Gut	JUT-011	1	NA	1	NA
FBtr0333080	FBgn0035719	Head	MUN-016	2	NA	1	NA
FBtr0333080	FBgn0035719	Head	MUN-016	20	8	1	NA
FBtr0333077	FBgn0035719	Head	MUN-016	2	NA	1	NA
FBtr0333077	FBgn0035719	Head	MUN-016	20	8	1	NA
FBtr0113150	FBgn0035719	Head	MUN-016	2	NA	1	NA
FBtr0113150	FBgn0035719	Head	MUN-016	20	8	1	NA
FBtr0333078	FBgn0035719	Head	MUN-016	2	NA	1	NA
FBtr0333078	FBgn0035719	Head	MUN-016	20	8	1	NA
FBtr0075171	FBgn0052190	Head	JUT-011	2	NA	1	NA
FBtr0075171	FBgn0052190	Head	JUT-011	2	NA	1	NA
FBtr0344383	FBgn0262127	Head	SLA-001	20	5	1	13
FBtr0344383	FBgn0262127	Head	SLA-001	20	NA	1	6
FBtr0081324	FBgn0032817	Ovary	MUN-016	1	NA	1	NA
FBtr0081324	FBgn0032817	Ovary	MUN-016	20	NA	1	6
FBtr0299789	FBgn0259227	Head	SLA-001	1	NA	1	NA
FBtr0299789	FBgn0259227	Head	SLA-001	1	NA	1	NA
FBtr0072272	FBgn0005638	Ovary	TOM-007	20	6	1	8
FBtr0072272	FBgn0005638	Ovary	TOM-007	2	NA	1	NA
FBtr0100174	FBgn0000578	Gut	JUT-011	20	6	1	16
FBtr0086582	FBgn0000578	Gut	JUT-011	20	6	1	16
FBtr0086583	FBgn0000578	Gut	JUT-011	20	6	1	16
FBtr0086584	FBgn0000578	Gut	JUT-011	20	6	1	16
FBtr0302709	FBgn0261555	Ovary	TOM-007	1	NA	1	NA
FBtr0290246	FBgn0051869	Gut	JUT-011	1	NA	1	NA
FBtr0305356	FBgn0262617	Ovary	JUT-011	1	NA	1	NA
FBtr0305354	FBgn0262617	Ovary	JUT-011	1	NA	1	NA
FBtr0080189	FBgn0051869	Gut	JUT-011	1	NA	1	NA
FBtr0337049	FBgn0262617	Ovary	JUT-011	1	NA	1	NA
FBtr0072272	FBgn0005638	Gut	JUT-011	20	7	1	8
FBtr0072272	FBgn0005638	Gut	JUT-011	2	NA	1	NA
FBtr0074174	FBgn0026076	Head	AKA-017	1	NA	1	NA
FBtr0331920	FBgn0261456	Ovary	JUT-011	2	NA	1	NA
FBtr0075330	FBgn0036668	Ovary	SLA-001	1	NA	1	NA
FBtr0075330	FBgn0036668	Ovary	SLA-001	1	NA	1	NA
FBtr0075330	FBgn0036668	Ovary	SLA-001	11	NA	1	NA
FBtr0075330	FBgn0036668	Ovary	SLA-001	4	NA	1	NA
FBtr0336876	FBgn0011217	Ovary	AKA-017	20	NA	1	NA
FBtr0336876	FBgn0011217	Ovary	AKA-017	2	NA	1	NA
FBtr0083917	FBgn0001169	Gut	TOM-007	1	NA	1	NA
FBtr0083917	FBgn0001169	Gut	TOM-007	1	NA	1	NA
FBtr0083914	FBgn0001169	Gut	TOM-007	1	NA	1	NA
FBtr0083914	FBgn0001169	Gut	TOM-007	1	NA	1	NA
FBtr0112642	FBgn0085424	Gut	TOM-007	1	NA	1	NA
FBtr0112642	FBgn0085424	Gut	TOM-007	20	NA	1	2
FBtr0112642	FBgn0085424	Gut	TOM-007	7	NA	1	NA
FBtr0334747	FBgn0004179	Head	AKA-017	1	NA	1	NA
FBtr0334747	FBgn0004179	Head	AKA-017	20	2	1	16
FBtr0078495	FBgn0004179	Head	AKA-017	1	NA	1	NA
FBtr0078495	FBgn0004179	Head	AKA-017	20	2	1	16
FBtr0304697	FBgn0000662	Gut	MUN-016	20	NA	1	NA
FBtr0304697	FBgn0000662	Gut	MUN-016	8	NA	1	NA
FBtr0304697	FBgn0000662	Gut	MUN-016	1	NA	1	NA
FBtr0340631	FBgn0261570	Ovary	JUT-011	20	NA	1	NA
FBtr0340631	FBgn0261570	Ovary	JUT-011	20	NA	1	NA
FBtr0340632	FBgn0261570	Ovary	JUT-011	20	NA	1	NA
FBtr0340632	FBgn0261570	Ovary	JUT-011	20	NA	1	NA
FBtr0302964	FBgn0030121	Ovary	JUT-011	2	NA	1	NA
FBtr0302964	FBgn0030121	Ovary	JUT-011	2	NA	1	NA
FBtr0302964	FBgn0030121	Ovary	JUT-011	1	NA	1	NA
FBtr0302964	FBgn0030121	Ovary	JUT-011	4	NA	1	NA
FBtr0302964	FBgn0030121	Ovary	JUT-011	20	NA	1	NA
FBtr0302964	FBgn0030121	Ovary	JUT-011	20	NA	1	NA
FBtr0302964	FBgn0030121	Ovary	JUT-011	10	NA	1	NA
FBtr0302964	FBgn0030121	Ovary	JUT-011	2	NA	1	NA
FBtr0302964	FBgn0030121	Ovary	JUT-011	1	NA	1	NA
FBtr0302964	FBgn0030121	Ovary	JUT-011	2	NA	1	NA
FBtr0302964	FBgn0030121	Ovary	JUT-011	1	NA	1	NA
FBtr0083917	FBgn0001169	Head	TOM-007	1	NA	1	NA
FBtr0083917	FBgn0001169	Head	TOM-007	1	NA	1	NA
FBtr0343556	FBgn0266101	Head	SLA-001	1	NA	1	NA
FBtr0343556	FBgn0266101	Head	SLA-001	20	6	1	7
FBtr0333266	FBgn0052479	Head	SLA-001	1	NA	1	NA
FBtr0333266	FBgn0052479	Head	SLA-001	20	3	1	8
FBtr0333266	FBgn0052479	Head	SLA-001	1	NA	1	NA
FBtr0332233	FBgn0262475	Gut	AKA-017	1	NA	1	NA
FBtr0332233	FBgn0262475	Gut	AKA-017	20	6	1	NA
FBtr0332233	FBgn0262475	Gut	AKA-017	1	NA	1	NA
FBtr0332233	FBgn0262475	Gut	AKA-017	1	NA	1	NA
FBtr0332233	FBgn0262475	Gut	AKA-017	3	NA	1	NA
FBtr0332234	FBgn0262475	Gut	AKA-017	1	NA	1	NA
FBtr0332234	FBgn0262475	Gut	AKA-017	20	6	1	NA
FBtr0332234	FBgn0262475	Gut	AKA-017	1	NA	1	NA
FBtr0332234	FBgn0262475	Gut	AKA-017	1	NA	1	NA
FBtr0332234	FBgn0262475	Gut	AKA-017	3	NA	1	NA
FBtr0333156	FBgn0264542	Head	SLA-001	1	NA	1	NA
FBtr0333156	FBgn0264542	Head	SLA-001	20	NA	1	NA
FBtr0333156	FBgn0264542	Head	SLA-001	1	NA	1	NA
FBtr0333156	FBgn0264542	Head	SLA-001	20	NA	1	NA
FBtr0084898	FBgn0261986	Gut	AKA-017	10	NA	1	NA
FBtr0084898	FBgn0261986	Gut	AKA-017	1	NA	1	NA
FBtr0084898	FBgn0261986	Gut	AKA-017	1	NA	1	NA
FBtr0075054	FBgn0036811	Head	MUN-016	20	4	1	9
FBtr0072578	FBgn0000575	Ovary	MUN-016	1	NA	1	NA
FBtr0301501	FBgn0011754	Ovary	AKA-017	20	NA	1	10
FBtr0073685	FBgn0030417	Head	SLA-001	1	NA	1	NA
FBtr0073685	FBgn0030417	Head	SLA-001	20	NA	1	3
FBtr0073685	FBgn0030417	Head	SLA-001	1	NA	1	NA
FBtr0080113	FBgn0032295	Head	SLA-001	20	NA	1	NA
FBtr0080113	FBgn0032295	Head	SLA-001	11	NA	1	NA
FBtr0074920	FBgn0014037	Head	SLA-001	1	NA	1	NA
FBtr0074920	FBgn0014037	Head	SLA-001	18	15	1	12
FBtr0074920	FBgn0014037	Head	SLA-001	1	NA	1	NA
FBtr0074920	FBgn0014037	Head	SLA-001	1	NA	1	NA
FBtr0299837	FBgn0266557	Head	SLA-001	1	NA	1	NA
FBtr0308253	FBgn0266557	Head	SLA-001	1	NA	1	NA
FBtr0078144	FBgn0266557	Head	SLA-001	1	NA	1	NA
FBtr0308254	FBgn0266557	Head	SLA-001	1	NA	1	NA
FBtr0086566	FBgn0034408	Ovary	JUT-011	20	3	3	1
FBtr0344983	FBgn0004179	Head	MUN-016	1	NA	1	NA
FBtr0344983	FBgn0004179	Head	MUN-016	20	2	1	16
FBtr0082396	FBgn0037906	Ovary	MUN-016	2	NA	1	NA
FBtr0078493	FBgn0004179	Head	MUN-016	1	NA	1	NA
FBtr0078493	FBgn0004179	Head	MUN-016	20	2	1	16
FBtr0070914	FBgn0000524	Ovary	TOM-007	20	NA	1	10
FBtr0070914	FBgn0000524	Ovary	TOM-007	20	20	1	15
FBtr0070914	FBgn0000524	Ovary	TOM-007	18	NA	1	11
FBtr0070914	FBgn0000524	Ovary	TOM-007	20	NA	1	NA
FBtr0070914	FBgn0000524	Ovary	TOM-007	20	NA	1	NA
FBtr0306331	FBgn0052296	Gut	JUT-011	2	NA	1	NA
FBtr0306331	FBgn0052296	Gut	JUT-011	1	NA	1	NA
FBtr0306331	FBgn0052296	Gut	JUT-011	11	NA	1	11
FBtr0113067	FBgn0033639	Gut	JUT-011	1	NA	1	NA
FBtr0113067	FBgn0033639	Gut	JUT-011	1	NA	1	NA
FBtr0113067	FBgn0033639	Gut	JUT-011	1	NA	1	NA
FBtr0078350	FBgn0005694	Head	TOM-007	20	11	1	NA
FBtr0075580	FBgn0041160	Head	TOM-007	20	6	1	16
FBtr0347540	FBgn0037098	Ovary	SLA-001	1	NA	1	NA
FBtr0347540	FBgn0037098	Ovary	SLA-001	1	NA	1	NA
FBtr0346819	FBgn0037098	Ovary	SLA-001	1	NA	1	NA
FBtr0346819	FBgn0037098	Ovary	SLA-001	1	NA	1	NA
FBtr0100153	FBgn0001168	Head	MUN-016	20	NA	1	NA
FBtr0100153	FBgn0001168	Head	MUN-016	20	NA	1	NA
FBtr0305356	FBgn0262617	Ovary	TOM-007	1	NA	1	NA
FBtr0337049	FBgn0262617	Ovary	TOM-007	1	NA	1	NA
FBtr0082396	FBgn0037906	Ovary	SLA-001	2	NA	1	NA
FBtr0345028	FBgn0035388	Head	AKA-017	1	NA	1	NA
FBtr0345028	FBgn0035388	Head	AKA-017	1	NA	1	NA
FBtr0305011	FBgn0262562	Head	JUT-011	20	19	1	17
FBtr0305011	FBgn0262562	Head	JUT-011	7	NA	1	NA
FBtr0087315	FBgn0265991	Ovary	SLA-001	1	NA	1	NA
FBtr0086516	FBgn0086358	Gut	SLA-001	20	3	1	2
FBtr0331925	FBgn0086358	Gut	SLA-001	20	3	1	2
FBtr0076369	FBgn0015618	Ovary	AKA-017	20	8	1	6
FBtr0076369	FBgn0015618	Ovary	AKA-017	20	6	1	NA
FBtr0305033	FBgn0042693	Ovary	MUN-016	1	NA	1	NA
FBtr0305033	FBgn0042693	Ovary	MUN-016	1	NA	1	NA
FBtr0305033	FBgn0042693	Ovary	MUN-016	1	NA	1	NA
FBtr0083553	FBgn0042693	Ovary	MUN-016	1	NA	1	NA
FBtr0083553	FBgn0042693	Ovary	MUN-016	1	NA	1	NA
FBtr0083553	FBgn0042693	Ovary	MUN-016	1	NA	1	NA
FBtr0083552	FBgn0042693	Ovary	MUN-016	1	NA	1	NA
FBtr0083552	FBgn0042693	Ovary	MUN-016	1	NA	1	NA
FBtr0083552	FBgn0042693	Ovary	MUN-016	1	NA	1	NA
FBtr0078348	FBgn0005694	Head	JUT-011	20	11	1	NA
FBtr0304697	FBgn0000662	Head	SLA-001	20	NA	1	NA
FBtr0304697	FBgn0000662	Head	SLA-001	20	NA	1	NA
FBtr0304697	FBgn0000662	Head	SLA-001	1	NA	1	NA
FBtr0304697	FBgn0000662	Head	SLA-001	20	NA	1	NA
FBtr0304697	FBgn0000662	Head	SLA-001	20	NA	1	NA
FBtr0304697	FBgn0000662	Head	SLA-001	1	NA	1	NA
FBtr0075806	FBgn0086708	Ovary	JUT-011	20	4	1	NA
FBtr0113425	FBgn0086708	Ovary	JUT-011	20	4	1	NA
FBtr0330261	FBgn0263993	Gut	JUT-011	1	NA	1	NA
FBtr0330261	FBgn0263993	Gut	JUT-011	20	19	1	NA
FBtr0072578	FBgn0000575	Gut	SLA-001	1	NA	1	NA
FBtr0076396	FBgn0036032	Head	SLA-001	20	5	1	NA
FBtr0076396	FBgn0036032	Head	SLA-001	20	4	1	15
FBtr0076396	FBgn0036032	Head	SLA-001	20	13	1	NA
FBtr0076396	FBgn0036032	Head	SLA-001	19	NA	1	NA
FBtr0076396	FBgn0036032	Head	SLA-001	3	NA	1	NA
FBtr0070969	FBgn0086693	Head	JUT-011	20	NA	1	NA
FBtr0070969	FBgn0086693	Head	JUT-011	20	NA	1	9
FBtr0084167	FBgn0027575	Head	JUT-011	20	14	1	NA
FBtr0339154	FBgn0027575	Head	JUT-011	20	14	1	NA
FBtr0303163	FBgn0085370	Head	JUT-011	2	NA	1	NA
FBtr0083913	FBgn0038815	Ovary	JUT-011	20	NA	1	20
FBtr0083913	FBgn0038815	Ovary	JUT-011	20	NA	1	14
FBtr0339717	FBgn0039688	Gut	JUT-011	3	NA	1	NA
FBtr0089716	FBgn0003118	Head	MUN-016	1	NA	1	NA
FBtr0345911	FBgn0086680	Head	JUT-011	20	14	1	NA
FBtr0345911	FBgn0086680	Head	JUT-011	20	NA	1	17
FBtr0345911	FBgn0086680	Head	JUT-011	16	NA	1	NA
FBtr0100153	FBgn0001168	Ovary	MUN-016	20	NA	1	NA
FBtr0302834	FBgn0261570	Ovary	AKA-017	20	NA	1	NA
FBtr0340629	FBgn0261570	Ovary	AKA-017	20	NA	1	NA
FBtr0076369	FBgn0015618	Ovary	TOM-007	20	3	1	5
FBtr0074276	FBgn0026575	Ovary	MUN-016	20	NA	1	19
FBtr0290112	FBgn0033313	Gut	MUN-016	40	12	1	3
FBtr0290112	FBgn0033313	Gut	MUN-016	40	NA	1	5
FBtr0310448	FBgn0033313	Gut	MUN-016	20	12	1	3
FBtr0310448	FBgn0033313	Gut	MUN-016	20	NA	1	5
FBtr0305082	FBgn0033313	Gut	MUN-016	20	12	1	3
FBtr0305082	FBgn0033313	Gut	MUN-016	20	NA	1	5
FBtr0310448	FBgn0033313	Gut	MUN-016	20	12	1	3
FBtr0310448	FBgn0033313	Gut	MUN-016	20	NA	1	5
FBtr0305081	FBgn0033313	Gut	MUN-016	20	12	1	3
FBtr0305081	FBgn0033313	Gut	MUN-016	20	NA	1	5
FBtr0346819	FBgn0037098	Head	TOM-007	1	NA	1	NA
FBtr0346819	FBgn0037098	Head	TOM-007	1	NA	1	NA
FBtr0344983	FBgn0004179	Gut	MUN-016	2	NA	1	NA
FBtr0344983	FBgn0004179	Gut	MUN-016	40	2	1	16
FBtr0334747	FBgn0004179	Gut	MUN-016	1	NA	1	NA
FBtr0334747	FBgn0004179	Gut	MUN-016	20	2	1	16
FBtr0329963	FBgn0032796	Head	AKA-017	3	NA	1	NA
FBtr0112843	FBgn0004860	Gut	SLA-001	1	NA	1	NA
FBtr0112843	FBgn0004860	Gut	SLA-001	2	NA	1	NA
FBtr0070432	FBgn0004861	Gut	SLA-001	2	NA	1	NA
FBtr0301515	FBgn0004861	Gut	SLA-001	2	NA	1	NA
FBtr0342743	FBgn0260780	Gut	SLA-001	20	4	1	NA
FBtr0342743	FBgn0260780	Gut	SLA-001	20	NA	1	NA
FBtr0342743	FBgn0260780	Gut	SLA-001	1	NA	1	NA
FBtr0342743	FBgn0260780	Gut	SLA-001	1	NA	1	NA
FBtr0342743	FBgn0260780	Gut	SLA-001	1	NA	1	NA
FBtr0339961	FBgn0000289	Gut	SLA-001	20	NA	1	20
FBtr0339961	FBgn0000289	Gut	SLA-001	20	NA	1	NA
FBtr0339961	FBgn0000289	Gut	SLA-001	1	NA	1	NA
FBtr0087526	FBgn0000289	Gut	SLA-001	20	NA	1	20
FBtr0087526	FBgn0000289	Gut	SLA-001	20	NA	1	NA
FBtr0087526	FBgn0000289	Gut	SLA-001	1	NA	1	NA
FBtr0343825	FBgn0032688	Head	TOM-007	20	5	1	NA
FBtr0081070	FBgn0032688	Head	TOM-007	20	5	1	NA
FBtr0080189	FBgn0051869	Ovary	TOM-007	1	NA	1	NA
FBtr0080113	FBgn0032295	Head	AKA-017	20	NA	1	3
FBtr0080113	FBgn0032295	Head	AKA-017	9	9	1	NA
FBtr0345028	FBgn0035388	Ovary	AKA-017	1	NA	1	NA
FBtr0345028	FBgn0035388	Ovary	AKA-017	1	NA	1	NA
FBtr0343825	FBgn0032688	Gut	TOM-007	20	5	1	NA
FBtr0081070	FBgn0032688	Gut	TOM-007	20	5	1	NA
FBtr0083795	FBgn0014135	Head	JUT-011	20	5	1	2
FBtr0083795	FBgn0014135	Head	JUT-011	2	NA	1	NA
FBtr0083795	FBgn0014135	Head	JUT-011	20	5	2	1
FBtr0300123	FBgn0014135	Head	JUT-011	20	5	1	2
FBtr0300123	FBgn0014135	Head	JUT-011	2	NA	1	NA
FBtr0300123	FBgn0014135	Head	JUT-011	20	5	2	1
FBtr0334339	FBgn0039663	Ovary	MUN-016	20	NA	1	NA
FBtr0080187	FBgn0032305	Gut	TOM-007	1	NA	1	NA
FBtr0301040	FBgn0052982	Ovary	JUT-011	20	2	1	NA
FBtr0075330	FBgn0036668	Gut	AKA-017	1	NA	1	NA
FBtr0075330	FBgn0036668	Gut	AKA-017	1	NA	1	NA
FBtr0075330	FBgn0036668	Gut	AKA-017	11	NA	1	NA
FBtr0075330	FBgn0036668	Gut	AKA-017	4	NA	1	NA
FBtr0071838	FBgn0003175	Ovary	SLA-001	1	NA	1	NA
FBtr0330085	FBgn0045862	Head	MUN-016	1	NA	1	NA
FBtr0330085	FBgn0045862	Head	MUN-016	20	4	1	3
FBtr0332944	FBgn0053558	Head	MUN-016	20	7	1	12
FBtr0078144	FBgn0266557	Ovary	TOM-007	1	NA	1	NA
FBtr0299837	FBgn0266557	Ovary	TOM-007	1	NA	1	NA
FBtr0301402	FBgn0264491	Ovary	TOM-007	1	NA	1	NA
FBtr0305011	FBgn0262562	Head	AKA-017	20	19	1	17
FBtr0305011	FBgn0262562	Head	AKA-017	2	NA	1	NA
FBtr0305011	FBgn0262562	Head	AKA-017	16	NA	1	NA
FBtr0082396	FBgn0037906	Gut	SLA-001	2	NA	1	NA
FBtr0305011	FBgn0262562	Head	AKA-017	20	NA	1	3
FBtr0345598	FBgn0004861	Gut	AKA-017	2	NA	1	NA
FBtr0112843	FBgn0004860	Gut	AKA-017	1	NA	1	NA
FBtr0112843	FBgn0004860	Gut	AKA-017	2	NA	1	NA
FBtr0345638	FBgn0051908	Gut	AKA-017	9	NA	1	8
FBtr0075330	FBgn0036668	Head	AKA-017	1	NA	1	NA
FBtr0075330	FBgn0036668	Head	AKA-017	1	NA	1	NA
FBtr0075330	FBgn0036668	Head	AKA-017	11	NA	1	NA
FBtr0075330	FBgn0036668	Head	AKA-017	4	NA	1	NA
FBtr0332738	FBgn0035574	Head	AKA-017	8	NA	1	NA
FBtr0332738	FBgn0035574	Head	AKA-017	20	5	1	17
FBtr0078380	FBgn0037099	Gut	SLA-001	1	NA	1	NA
FBtr0078380	FBgn0037099	Gut	SLA-001	1	NA	1	NA
FBtr0070396	FBgn0000810	Ovary	JUT-011	1	NA	1	NA
FBtr0100609	FBgn0031159	Head	AKA-017	6	NA	1	3
FBtr0332738	FBgn0035574	Ovary	TOM-007	8	NA	1	NA
FBtr0332738	FBgn0035574	Ovary	TOM-007	20	5	1	17
FBtr0074276	FBgn0026575	Ovary	JUT-011	20	NA	1	NA
FBtr0075171	FBgn0052190	Ovary	SLA-001	2	NA	1	NA
FBtr0075171	FBgn0052190	Ovary	SLA-001	2	NA	1	NA
FBtr0331398	FBgn0037206	Head	JUT-011	2	NA	1	NA
FBtr0083917	FBgn0001169	Gut	SLA-001	1	NA	1	NA
FBtr0083917	FBgn0001169	Gut	SLA-001	2	NA	1	NA
FBtr0083917	FBgn0001169	Gut	SLA-001	1	NA	1	NA
FBtr0330085	FBgn0045862	Gut	SLA-001	1	NA	1	NA
FBtr0330085	FBgn0045862	Gut	SLA-001	20	4	1	3
FBtr0329963	FBgn0032796	Ovary	SLA-001	3	NA	1	NA
FBtr0081282	FBgn0032796	Ovary	SLA-001	3	NA	1	NA
FBtr0300123	FBgn0014135	Head	SLA-001	20	5	1	2
FBtr0300123	FBgn0014135	Head	SLA-001	2	NA	1	NA
FBtr0300123	FBgn0014135	Head	SLA-001	9	NA	1	9
FBtr0300123	FBgn0014135	Head	SLA-001	20	17	1	10
FBtr0073573	FBgn0260780	Gut	TOM-007	20	4	1	NA
FBtr0073573	FBgn0260780	Gut	TOM-007	20	NA	1	NA
FBtr0073573	FBgn0260780	Gut	TOM-007	1	NA	1	NA
FBtr0073573	FBgn0260780	Gut	TOM-007	1	NA	1	NA
FBtr0073573	FBgn0260780	Gut	TOM-007	1	NA	1	NA
FBtr0339717	FBgn0039688	Head	MUN-016	2	NA	1	NA
FBtr0339717	FBgn0039688	Head	MUN-016	20	NA	1	7
FBtr0070396	FBgn0000810	Ovary	SLA-001	1	NA	1	NA
FBtr0089678	FBgn0003464	Head	JUT-011	5	NA	1	NA
FBtr0089678	FBgn0003464	Head	JUT-011	20	NA	1	NA
FBtr0089678	FBgn0003464	Head	JUT-011	20	NA	2	1
FBtr0346819	FBgn0037098	Ovary	TOM-007	1	NA	1	NA
FBtr0346819	FBgn0037098	Ovary	TOM-007	1	NA	1	NA
FBtr0347540	FBgn0037098	Ovary	TOM-007	1	NA	1	NA
FBtr0347540	FBgn0037098	Ovary	TOM-007	1	NA	1	NA
FBtr0071604	FBgn0020306	Gut	TOM-007	1	NA	1	NA
FBtr0083552	FBgn0042693	Ovary	TOM-007	1	NA	1	NA
FBtr0083552	FBgn0042693	Ovary	TOM-007	1	NA	1	NA
FBtr0083552	FBgn0042693	Ovary	TOM-007	1	NA	1	NA
FBtr0083553	FBgn0042693	Ovary	TOM-007	4	NA	1	NA
FBtr0083553	FBgn0042693	Ovary	TOM-007	4	NA	1	NA
FBtr0083553	FBgn0042693	Ovary	TOM-007	4	NA	1	NA
FBtr0305033	FBgn0042693	Ovary	TOM-007	1	NA	1	NA
FBtr0305033	FBgn0042693	Ovary	TOM-007	1	NA	1	NA
FBtr0305033	FBgn0042693	Ovary	TOM-007	1	NA	1	NA
FBtr0336467	FBgn0042693	Ovary	TOM-007	1	NA	1	NA
FBtr0336467	FBgn0042693	Ovary	TOM-007	1	NA	1	NA
FBtr0336467	FBgn0042693	Ovary	TOM-007	1	NA	1	NA
FBtr0305034	FBgn0042693	Ovary	TOM-007	1	NA	1	NA
FBtr0305034	FBgn0042693	Ovary	TOM-007	1	NA	1	NA
FBtr0305034	FBgn0042693	Ovary	TOM-007	1	NA	1	NA
FBtr0075538	FBgn0036534	Head	AKA-017	20	16	1	7
FBtr0072589	FBgn0052479	Gut	TOM-007	1	NA	1	NA
FBtr0072589	FBgn0052479	Gut	TOM-007	14	3	1	11
FBtr0072589	FBgn0052479	Gut	TOM-007	1	NA	1	NA
FBtr0334498	FBgn0004882	Head	AKA-017	1	NA	1	NA
FBtr0334498	FBgn0004882	Head	AKA-017	20	NA	1	4
FBtr0300997	FBgn0052772	Ovary	AKA-017	1	NA	1	NA
FBtr0342952	FBgn0052772	Ovary	AKA-017	1	NA	1	NA
FBtr0082117	FBgn0037705	Head	AKA-017	2	NA	1	NA
FBtr0072272	FBgn0005638	Gut	AKA-017	20	6	1	8
FBtr0072272	FBgn0005638	Gut	AKA-017	2	NA	1	NA
FBtr0082116	FBgn0037705	Head	AKA-017	2	NA	1	NA
FBtr0089717	FBgn0003118	Head	JUT-011	1	NA	1	NA
FBtr0343825	FBgn0032688	Ovary	JUT-011	20	5	1	NA
FBtr0081070	FBgn0032688	Ovary	JUT-011	20	5	1	NA
FBtr0089052	FBgn0002930	Ovary	TOM-007	8	NA	1	8
FBtr0333774	FBgn0264678	Ovary	AKA-017	8	NA	1	NA
FBtr0333774	FBgn0264678	Ovary	AKA-017	1	NA	1	NA
FBtr0333774	FBgn0264678	Ovary	AKA-017	13	NA	1	NA
FBtr0333774	FBgn0264678	Ovary	AKA-017	1	NA	1	NA
FBtr0333774	FBgn0264678	Ovary	AKA-017	20	NA	1	NA
FBtr0333774	FBgn0264678	Ovary	AKA-017	1	NA	1	NA
FBtr0076368	FBgn0004390	Ovary	AKA-017	1	NA	1	NA
FBtr0085355	FBgn0039601	Gut	SLA-001	2	NA	1	NA
FBtr0076369	FBgn0015618	Head	MUN-016	20	8	1	6
FBtr0076369	FBgn0015618	Head	MUN-016	20	6	1	NA
FBtr0076369	FBgn0015618	Head	MUN-016	5	NA	1	NA
FBtr0075171	FBgn0052190	Head	AKA-017	2	NA	1	NA
FBtr0075171	FBgn0052190	Head	AKA-017	2	NA	1	NA
FBtr0075171	FBgn0052190	Head	AKA-017	4	NA	1	NA
FBtr0344676	FBgn0266566	Head	AKA-017	1	NA	1	NA
FBtr0089648	FBgn0000286	Ovary	JUT-011	20	3	1	NA
FBtr0304887	FBgn0000286	Ovary	JUT-011	20	3	1	NA
FBtr0074099	FBgn0003345	Gut	AKA-017	5	NA	1	5
FBtr0290246	FBgn0051869	Gut	TOM-007	1	NA	1	NA
FBtr0080189	FBgn0051869	Gut	TOM-007	1	NA	1	NA
FBtr0299837	FBgn0266557	Ovary	JUT-011	1	NA	1	NA
FBtr0308253	FBgn0266557	Ovary	JUT-011	1	NA	1	NA
FBtr0079139	FBgn0031740	Ovary	JUT-011	1	NA	1	NA
FBtr0075708	FBgn0013263	Ovary	JUT-011	7	NA	1	NA
FBtr0342990	FBgn0034720	Gut	MUN-016	1	NA	1	NA
FBtr0301151	FBgn0020880	Gut	MUN-016	1	NA	1	NA
FBtr0303434	FBgn0261854	Gut	MUN-016	2	NA	1	NA
FBtr0303434	FBgn0261854	Gut	MUN-016	1	NA	1	NA
FBtr0303434	FBgn0261854	Gut	MUN-016	2	NA	1	NA
FBtr0331925	FBgn0086358	Gut	MUN-016	20	4	1	2
FBtr0081283	FBgn0032796	Head	MUN-016	3	NA	1	NA
FBtr0329963	FBgn0032796	Head	MUN-016	3	NA	1	NA
FBtr0075580	FBgn0041160	Ovary	MUN-016	20	6	1	16
FBtr0340488	FBgn0265630	Ovary	SLA-001	2	NA	1	NA
FBtr0310443	FBgn0026878	Ovary	MUN-016	11	NA	1	8
FBtr0083917	FBgn0001169	Gut	JUT-011	1	NA	1	NA
FBtr0083917	FBgn0001169	Gut	JUT-011	1	NA	1	NA
FBtr0083915	FBgn0001169	Gut	JUT-011	1	NA	1	NA
FBtr0083915	FBgn0001169	Gut	JUT-011	1	NA	1	NA
FBtr0083914	FBgn0001169	Gut	JUT-011	1	NA	1	NA
FBtr0083914	FBgn0001169	Gut	JUT-011	1	NA	1	NA
FBtr0080700	FBgn0004837	Head	JUT-011	20	2	1	11
FBtr0080700	FBgn0004837	Head	JUT-011	20	2	1	11
FBtr0075171	FBgn0052190	Gut	AKA-017	2	NA	1	NA
FBtr0075171	FBgn0052190	Gut	AKA-017	2	NA	1	NA
FBtr0075171	FBgn0052190	Gut	AKA-017	4	NA	1	NA
FBtr0330045	FBgn0038233	Head	MUN-016	20	NA	1	4
FBtr0079139	FBgn0031740	Head	JUT-011	1	NA	1	NA
FBtr0100154	FBgn0261823	Head	AKA-017	1	NA	1	NA
FBtr0100154	FBgn0261823	Head	AKA-017	3	NA	1	NA
FBtr0089678	FBgn0003464	Ovary	TOM-007	5	NA	1	NA
FBtr0089678	FBgn0003464	Ovary	TOM-007	20	NA	1	NA
FBtr0089678	FBgn0003464	Ovary	TOM-007	20	NA	2	1
FBtr0083735	FBgn0051475	Head	TOM-007	1	NA	1	NA
FBtr0335427	FBgn0003117	Gut	TOM-007	1	NA	1	NA
FBtr0083221	FBgn0003117	Gut	TOM-007	1	NA	1	NA
FBtr0321267	FBgn0042125	Gut	MUN-016	3	NA	1	NA
FBtr0321267	FBgn0042125	Gut	MUN-016	20	12	1	6
FBtr0321267	FBgn0042125	Gut	MUN-016	7	NA	1	NA
FBtr0083914	FBgn0001169	Ovary	TOM-007	1	NA	1	NA
FBtr0083914	FBgn0001169	Ovary	TOM-007	1	NA	1	NA
FBtr0083917	FBgn0001169	Ovary	TOM-007	1	NA	1	NA
FBtr0083917	FBgn0001169	Ovary	TOM-007	1	NA	1	NA
FBtr0083915	FBgn0001169	Ovary	TOM-007	1	NA	1	NA
FBtr0083915	FBgn0001169	Ovary	TOM-007	1	NA	1	NA
FBtr0302651	FBgn0261547	Head	MUN-016	1	NA	1	NA
FBtr0302651	FBgn0261547	Head	MUN-016	1	NA	1	NA
FBtr0100609	FBgn0031159	Head	TOM-007	1	NA	1	NA
FBtr0343825	FBgn0032688	Head	SLA-001	40	5	1	NA
FBtr0081070	FBgn0032688	Head	SLA-001	20	5	1	NA
FBtr0113324	FBgn0040305	Head	MUN-016	1	NA	1	NA
FBtr0078493	FBgn0004179	Head	SLA-001	1	NA	1	NA
FBtr0078493	FBgn0004179	Head	SLA-001	20	2	1	16
FBtr0334747	FBgn0004179	Head	SLA-001	1	NA	1	NA
FBtr0334747	FBgn0004179	Head	SLA-001	20	2	1	16
FBtr0343315	FBgn0266048	Head	JUT-011	2	NA	2	1
FBtr0085355	FBgn0039601	Gut	JUT-011	1	NA	1	NA
FBtr0070950	FBgn0028360	Gut	AKA-017	20	NA	1	NA
FBtr0345028	FBgn0035388	Head	SLA-001	1	NA	1	NA
FBtr0345028	FBgn0035388	Head	SLA-001	1	NA	1	NA
FBtr0336617	FBgn0262160	Ovary	MUN-016	1	NA	1	NA
FBtr0347211	FBgn0053208	Head	TOM-007	12	10	1	NA
FBtr0347211	FBgn0053208	Head	TOM-007	12	10	1	NA
FBtr0080188	FBgn0011676	Head	JUT-011	4	NA	1	NA
FBtr0273348	FBgn0035921	Head	TOM-007	1	NA	1	NA
FBtr0273348	FBgn0035921	Head	TOM-007	20	NA	1	NA
FBtr0076417	FBgn0016081	Ovary	JUT-011	20	2	1	9
FBtr0076417	FBgn0016081	Ovary	JUT-011	19	2	1	4
FBtr0306241	FBgn0016081	Ovary	JUT-011	20	2	1	9
FBtr0306241	FBgn0016081	Ovary	JUT-011	19	2	1	4
[truncated: 11,610 more rows]
[truncated: 82 more columns]
