# Supplementary material for: Transposons contribute to the functional diversification of the head, gut, and ovary transcriptomes across Drosophila natural strains
Source: HighWire-hosted journal article supplement (doi:10.1101/gr.277565.122), 2023-09-01
Supplement: Supplemental_Tables.zip [file Supplemental_Table_6.xlsx]

## Sheet: Sheet1
Table S6. Expression analyses. A. Level of expression (TPM) of each chimeric gene-TE transcript detected in each body part and strain. B. Level of expression (TPM) of chimeric genes by strain and body part. Genes are classified on: genes producing chimeric and non-chimeric isoforms (variable), genes that always produce chimeric transcripts and genes producing isoforms without a TE. Only transcrip…
A. Expression level of each chimeric gene-TE transcript.
Body part	Strain	Transcript	Trinity ID	Stringtie ID	Gene	TE family	Exon position	Expression (TPM)	Coding capacity
Gut	AKA-017	FBtr0070351	TRINITY_DN802_c0_g1_i4	FBtr0070351	FBgn0023512	LARD	Last exon	14.407	0.999999
Gut	AKA-017	FBtr0070528	TRINITY_DN3517_c6_g1_i1	FBtr0070528	FBgn0029662	roo	Middle exon	6.31308	0.999977
Gut	AKA-017	FBtr0070829	TRINITY_DN2574_c0_g1_i6	FBtr0070829	FBgn0014340	G5A	Unique	22.0556	1
Gut	AKA-017	FBtr0070950	TRINITY_DN3448_c0_g3_i1	FBtr0070950	FBgn0028360	roo	Last exon	63.7418	0.999999
Gut	AKA-017	FBtr0071342	TRINITY_DN3688_c4_g1_i1	FBtr0071342	FBgn0030096	INE-1	Last exon	85.7505	0.999951
Gut	AKA-017	FBtr0071624	TRINITY_DN2550_c0_g1_i6	FBtr0071624	FBgn0034605	INE-1	Last exon	28.6287	0.999963
Gut	AKA-017	FBtr0071775	TRINITY_DN2770_c1_g7_i1	FBtr0071775	FBgn0020307	roo	Middle exon	45.393	1
Gut	AKA-017	FBtr0071792	TRINITY_DN257_c1_g1_i1	FBtr0071792	FBgn0243516	roo	Middle exon	29.8182	0.999868
Gut	AKA-017	FBtr0071838	TRINITY_DN746_c0_g1_i1	FBtr0071838	FBgn0003175	roo	Middle exon	8.34989	1
Gut	AKA-017	FBtr0072272	TRINITY_DN32_c1_g1_i2	FBtr0339359	FBgn0005638	roo	Unique	3.66359	0.999857
Gut	AKA-017	FBtr0072285	TRINITY_DN7362_c0_g1_i2	FBtr0072285	FBgn0034976	roo	Middle exon	9.87721	1
Gut	AKA-017	FBtr0072451	TRINITY_DN1135_c0_g1_i19	FBtr0072451	FBgn0050428	INE-1	Middle exon	5.57982	0.554233
Gut	AKA-017	FBtr0072711	TRINITY_DN995_c0_g1_i1	FBtr0072711	FBgn0043458	1360	Last exon	24.722	1
Gut	AKA-017	FBtr0073152	TRINITY_DN762_c1_g1_i3	FBtr0073152	FBgn0004875	roo	Middle exon	20.0758	1
Gut	AKA-017	FBtr0073153	TRINITY_DN762_c1_g1_i1	FBtr0073153	FBgn0004875	roo	Middle exon	10.0382	1
Gut	AKA-017	FBtr0073454	TRINITY_DN2030_c1_g2_i1	MSTRG.12107.1	FBgn0000499	roo	Unique	58.7014	0.999997
Gut	AKA-017	FBtr0073518	TRINITY_DN675_c0_g2_i2	FBtr0073519	FBgn0030318	Tom1	Last exon	85.5571	0.999587
Gut	AKA-017	FBtr0073573	TRINITY_DN4097_c0_g1_i2	MSTRG.12186.2	FBgn0260780	roo	Middle exon	65.6848	1
Gut	AKA-017	FBtr0073841	TRINITY_DN1220_c0_g1_i9	FBtr0073841	FBgn0001612	roo	Middle exon	31.5195	1
Gut	AKA-017	FBtr0074099	TRINITY_DN3342_c0_g2_i4	MSTRG.12526.1	FBgn0003345	roo	Last exon	4.83055	0.86153
Gut	AKA-017	FBtr0074174	TRINITY_DN443_c4_g1_i1	MSTRG.12534.2	FBgn0026076	roo	First exon	70.1612	0.970072
Gut	AKA-017	FBtr0074634	TRINITY_DN495_c0_g1_i1	FBtr0074634	FBgn0283473	roo	First exon	45.6602	0.999876
Gut	AKA-017	FBtr0074696	TRINITY_DN5030_c0_g1_i1	FBtr0074696	FBgn0030995	INE-1	Unique	25.0437	0.99797
Gut	AKA-017	FBtr0074747	TRINITY_DN2574_c0_g1_i5	FBtr0344152	FBgn0031054	G5A	Last exon	56.0284	0.786609
Gut	AKA-017	FBtr0074796	TRINITY_DN6872_c1_g1_i6	FBtr0074796	FBgn0026174	gypsy12	Unique	6.45791	0.901092
Gut	AKA-017	FBtr0075054	TRINITY_DN420_c8_g1_i1	FBtr0075054	FBgn0036811	roo	Last exon	108.195	0.905885
Gut	AKA-017	FBtr0075163	TRINITY_DN5030_c0_g2_i8	FBtr0075163	FBgn0052189	INE-1	Unique	10.0201	0.388999
Gut	AKA-017	FBtr0075171	TRINITY_DN3380_c0_g1_i2	FBtr0075171	FBgn0052190	roo	Last exon	88.1442	0.999995
Gut	AKA-017	FBtr0075285	TRINITY_DN3822_c1_g1_i7	FBtr0075285	FBgn0260943	roo	Last exon	4.01967	0.993577
Gut	AKA-017	FBtr0075330	TRINITY_DN3175_c0_g1_i1	FBtr0075330	FBgn0036668	roo	Last exon	32.5346	1
Gut	AKA-017	FBtr0075580	TRINITY_DN1278_c0_g1_i4	FBtr0075580	FBgn0041160	roo	Last exon	53.2587	0.996109
Gut	AKA-017	FBtr0075693	TRINITY_DN433_c0_g1_i1	FBtr0075693	FBgn0036451	roo	Middle exon	29.9473	1
Gut	AKA-017	FBtr0076368	TRINITY_DN2796_c1_g1_i1	FBtr0076368	FBgn0004390	roo	Last exon	14.1758	1
Gut	AKA-017	FBtr0076369	TRINITY_DN4632_c0_g4_i1	FBtr0076369	FBgn0015618	roo	Last exon	32.9071	0.999874
Gut	AKA-017	FBtr0076504	TRINITY_DN987_c0_g3_i2	FBtr0076504	FBgn0035993	INE-1	Last exon	45.5655	0.999204
Gut	AKA-017	FBtr0077267	TRINITY_DN2712_c0_g1_i3	MSTRG.13048.4	FBgn0031144	Tc3	Last exon	26.3793	0.999704
Gut	AKA-017	FBtr0077765	TRINITY_DN2212_c0_g1_i2	FBtr0331438	FBgn0031420	roo	Last exon	36.4327	1
Gut	AKA-017	FBtr0078061	TRINITY_DN6309_c0_g1_i1	FBtr0078061	FBgn0031257	roo	Last exon	4.96359	0.999997
Gut	AKA-017	FBtr0078144	TRINITY_DN47_c4_g1_i2	FBtr0078144	FBgn0266557	roo	First exon	10.0933	1
Gut	AKA-017	FBtr0078153	TRINITY_DN7723_c0_g1_i7	MSTRG.20.13	FBgn0025683	Quasimodo2	Middle exon	15.0951	0.999998
Gut	AKA-017	FBtr0078317	TRINITY_DN1611_c0_g1_i23	FBtr0078317	FBgn0053054	INE-1	First exon	3.93859	0.0429748
Gut	AKA-017	FBtr0078394	TRINITY_DN3454_c1_g2_i1	FBtr0078394	FBgn0037085	Cr1a	Last exon	6.39481	0.986079
Gut	AKA-017	FBtr0078486	TRINITY_DN791_c1_g1_i3	FBtr0078486	FBgn0027532	INE-1	First exon	37.9148	1
Gut	AKA-017	FBtr0078541	TRINITY_DN763_c0_g1_i3	FBtr0078541	FBgn0037178	INE-1	Unique	67.0041	0.509038
Gut	AKA-017	FBtr0078548	TRINITY_DN19606_c0_g1_i1	FBtr0078548	FBgn0037197	INE-1	Unique	18.7217	0.829045
Gut	AKA-017	FBtr0079139	TRINITY_DN425_c0_g1_i1	FBtr0079139	FBgn0031740	roo	Last exon	38.6838	0.999922
Gut	AKA-017	FBtr0079176	TRINITY_DN119_c0_g1_i7	FBtr0079176	FBgn0001942	blood	Middle exon	39.057	0.999739
Gut	AKA-017	FBtr0079177	TRINITY_DN119_c0_g1_i3	FBtr0079177	FBgn0001942	blood	Last exon	35.7952	0.999668
Gut	AKA-017	FBtr0079178	TRINITY_DN119_c0_g1_i4	FBtr0079178	FBgn0001942	blood	Middle exon	17.0716	0.999717
Gut	AKA-017	FBtr0079334	TRINITY_DN5114_c0_g1_i1	FBtr0079334	FBgn0000320	roo	Middle exon	3.48073	1
Gut	AKA-017	FBtr0079335	TRINITY_DN5114_c0_g1_i2	FBtr0079335	FBgn0000320	roo	Middle exon	4.01891	1
Gut	AKA-017	FBtr0079356	TRINITY_DN1654_c0_g1_i1	FBtr0346716	FBgn0264922	mdg1	First exon	109.137	0.877709
Gut	AKA-017	FBtr0079504	TRINITY_DN4073_c0_g1_i1	FBtr0079504	FBgn0031939	roo	First exon	16.7591	0.999951
Gut	AKA-017	FBtr0080200	TRINITY_DN5463_c1_g1_i1	FBtr0080200	FBgn0032348	roo	Last exon	22.8773	1
Gut	AKA-017	FBtr0081070	TRINITY_DN3896_c0_g1_i2	FBtr0081070	FBgn0032688	roo	Last exon	27.5773	1
Gut	AKA-017	FBtr0081283	TRINITY_DN9100_c0_g2_i4	FBtr0081283	FBgn0032796	roo	First exon	6.37164	1
Gut	AKA-017	FBtr0081461	TRINITY_DN726_c0_g1_i3	FBtr0346711	FBgn0010395	INE-1	Middle exon	8.81617	0.999753
Gut	AKA-017	FBtr0082116	TRINITY_DN3860_c0_g4_i2	FBtr0082116	FBgn0037705	roo	First exon	25.8524	0.999941
Gut	AKA-017	FBtr0083218	TRINITY_DN0_c3_g1_i5	FBtr0083218	FBgn0038391	roo	Middle exon	75.3902	1
Gut	AKA-017	FBtr0083553	TRINITY_DN175_c1_g1_i4	FBtr0083553	FBgn0042693	roo	Middle exon	18.791	0.999964
Gut	AKA-017	FBtr0083731	TRINITY_DN11_c0_g1_i15	FBtr0083731	FBgn0038681	Bari1	Last exon	73.6943	0.999971
Gut	AKA-017	FBtr0083795	TRINITY_DN5771_c0_g1_i1	FBtr0083795	FBgn0014135	roo	Middle exon	1.92361	0.999999
Gut	AKA-017	FBtr0083825	TRINITY_DN3860_c0_g3_i2	FBtr0083825	FBgn0038760	roo	Unique	31.0633	1
Gut	AKA-017	FBtr0083914	TRINITY_DN2063_c0_g1_i1	FBtr0083916	FBgn0001169	roo	Middle exon	10.6121	1
Gut	AKA-017	FBtr0083915	TRINITY_DN2063_c0_g1_i3	FBtr0083915	FBgn0001169	roo	Middle exon	11.5525	1
Gut	AKA-017	FBtr0083917	TRINITY_DN2063_c0_g1_i2	FBtr0083917	FBgn0001169	roo	First exon	5.44044	1
Gut	AKA-017	FBtr0083993	TRINITY_DN677_c0_g1_i7	MSTRG.9758.1	FBgn0038829	roo	Last exon	55.5723	0.996122
Gut	AKA-017	FBtr0084479	TRINITY_DN389_c3_g1_i1	FBtr0084479	FBgn0051145	roo	Middle exon	54.9193	0.999964
Gut	AKA-017	FBtr0084898	TRINITY_DN290_c2_g1_i1	FBtr0084898	FBgn0261986	roo	Middle exon	41.9343	0.999979
Gut	AKA-017	FBtr0085221	TRINITY_DN129_c1_g1_i2	FBtr0085221	FBgn0045862	roo	Unique	3.80084	1
Gut	AKA-017	FBtr0085298	TRINITY_DN34_c0_g1_i7	MSTRG.10647.1	FBgn0001215	jockey	First exon	10.8495	0.990415
Gut	AKA-017	FBtr0085355	TRINITY_DN3308_c0_g1_i1	FBtr0085355	FBgn0039601	roo	Last exon	79.6821	0.999994
Gut	AKA-017	FBtr0085718	TRINITY_DN3563_c0_g1_i1	FBtr0085718	FBgn0039807	roo	Unique	13.4468	0.998606
Gut	AKA-017	FBtr0085992	TRINITY_DN7137_c0_g1_i3	FBtr0085992	FBgn0263144	INE-1	Last exon	25.4917	1
Gut	AKA-017	FBtr0086081	TRINITY_DN695_c0_g2_i2	FBtr0086081	FBgn0033010	INE-1	Last exon	18.7814	0.999974
Gut	AKA-017	FBtr0086516	TRINITY_DN924_c0_g2_i8	FBtr0086516	FBgn0086358	roo	Last exon	80.5537	1
Gut	AKA-017	FBtr0087242	TRINITY_DN197_c1_g1_i1	FBtr0087242	FBgn0034087	INE-1	Last exon	59.114	1
Gut	AKA-017	FBtr0087369	TRINITY_DN6215_c0_g1_i4	FBtr0087369	FBgn0286785	INE-1	Last exon	3.51787	1
Gut	AKA-017	FBtr0087526	TRINITY_DN787_c0_g1_i17	FBtr0087526	FBgn0000289	roo	Middle exon	9.75585	0.999946
Gut	AKA-017	FBtr0087526	TRINITY_DN787_c0_g1_i17	FBtr0087526	FBgn0000289	roo	Last exon	9.75585	0.999946
Gut	AKA-017	FBtr0088074	TRINITY_DN820_c0_g1_i1	FBtr0088074	FBgn0050035	INE-1	First exon	5.72367	0.999564
Gut	AKA-017	FBtr0088095	TRINITY_DN2269_c0_g1_i1	FBtr0088095	FBgn0000577	roo	First exon	7.53387	0.99998
Gut	AKA-017	FBtr0088487	TRINITY_DN615_c1_g1_i3	FBtr0088487	FBgn0033448	roo	First exon	29.6486	0.999929
Gut	AKA-017	FBtr0088970	TRINITY_DN3669_c0_g1_i1	FBtr0088970	FBgn0003460	roo	Last exon	7.60573	0.998394
Gut	AKA-017	FBtr0089052	TRINITY_DN493_c7_g7_i1	FBtr0089052	FBgn0002930	roo	Middle exon	99.8648	0.99998
Gut	AKA-017	FBtr0089361	TRINITY_DN996_c0_g1_i14	FBtr0089361	FBgn0283521	roo	Last exon	27.5074	0.999991
Gut	AKA-017	FBtr0089479	TRINITY_DN4070_c0_g1_i5	FBtr0089479	FBgn0036640	TART-A	Middle exon	32.6859	1
Gut	AKA-017	FBtr0089479	TRINITY_DN4070_c0_g1_i5	FBtr0089479	FBgn0036640	TART-A	Last exon	32.6859	1
Gut	AKA-017	FBtr0100599	TRINITY_DN1013_c0_g1_i3	FBtr0100599	FBgn0024251	roo	Middle exon	24.3115	0.999999
Gut	AKA-017	FBtr0110916	TRINITY_DN2353_c0_g1_i70	FBtr0110916	FBgn0260003	roo	Middle exon	15.6383	1
Gut	AKA-017	FBtr0111111	TRINITY_DN4274_c0_g1_i1	MSTRG.2585.1	FBgn0046692	Gypsy-1_Dsim	Last exon	3.52256	0.115382
Gut	AKA-017	FBtr0111111	TRINITY_DN4274_c0_g1_i1	MSTRG.2585.1	FBgn0046692	Gypsy-6_Dse	Last exon	3.52256	0.115382
Gut	AKA-017	FBtr0111111	TRINITY_DN4274_c0_g1_i7	FBtr0308810	FBgn0046692	Gypsy-1_Dsim	Last exon	45.2934	0.823408
Gut	AKA-017	FBtr0111111	TRINITY_DN4274_c0_g1_i7	FBtr0308810	FBgn0046692	Gypsy-6_Dse	Last exon	45.2934	0.823408
Gut	AKA-017	FBtr0111144	TRINITY_DN3975_c0_g1_i2	FBtr0111144	FBgn0287187	INE-1	First exon	35.1659	0.00887216
Gut	AKA-017	FBtr0111144	TRINITY_DN3975_c0_g1_i2	FBtr0111144	FBgn0287187	INE-1	Last exon	35.1659	0.00887216
Gut	AKA-017	FBtr0111298	TRINITY_DN820_c1_g1_i1	FBtr0111298	FBgn0262115	INE-1	Last exon	37.886	0.997023
Gut	AKA-017	FBtr0111298	TRINITY_DN820_c1_g1_i1	FBtr0111298	FBgn0262115	gypsy2	Last exon	37.886	0.997023
Gut	AKA-017	FBtr0111300	TRINITY_DN820_c1_g1_i2	FBtr0111300	FBgn0262115	INE-1	Last exon	8.69791	0.987411
Gut	AKA-017	FBtr0111300	TRINITY_DN820_c1_g1_i2	FBtr0111300	FBgn0262115	gypsy2	Last exon	8.69791	0.987411
Gut	AKA-017	FBtr0112795	TRINITY_DN787_c0_g1_i23	MSTRG.3746.7	FBgn0000289	roo	Middle exon	9.23454	0.999976
Gut	AKA-017	FBtr0112795	TRINITY_DN787_c0_g1_i23	MSTRG.3746.7	FBgn0000289	roo	Last exon	9.23454	0.999976
Gut	AKA-017	FBtr0112820	TRINITY_DN746_c0_g1_i3	FBtr0112820	FBgn0003175	roo	Middle exon	53.0706	1
Gut	AKA-017	FBtr0112843	TRINITY_DN320_c0_g1_i5	MSTRG.11241.1	FBgn0004860	roo	First exon	21.3501	1
Gut	AKA-017	FBtr0112843	TRINITY_DN320_c0_g1_i5	MSTRG.11241.1	FBgn0004860	roo	Middle exon	21.3501	1
Gut	AKA-017	FBtr0112845	TRINITY_DN762_c1_g1_i2	FBtr0112845	FBgn0004875	roo	Middle exon	4.77554	1
Gut	AKA-017	FBtr0112868	TRINITY_DN1312_c0_g1_i2	MSTRG.12600.4	FBgn0011742	INE-1	Last exon	1.31987	0.991477
Gut	AKA-017	FBtr0112868	TRINITY_DN1312_c0_g1_i3	MSTRG.12600.3	FBgn0011742	INE-1	Last exon	8.9497	0.998065
Gut	AKA-017	FBtr0113430	TRINITY_DN670_c1_g1_i6	FBtr0113430	FBgn0052264	roo	Middle exon	9.32905	1
Gut	AKA-017	FBtr0113990	TRINITY_DN1504_c0_g1_i2	FBtr0113990	FBgn0039955	INE-1	Last exon	1.88745	1
Gut	AKA-017	FBtr0273261	TRINITY_DN3920_c0_g1_i1	FBtr0273261	FBgn0035290	roo	Middle exon	7.76045	0.999992
Gut	AKA-017	FBtr0273307	TRINITY_DN5481_c0_g1_i2	FBtr0273307	FBgn0034022	roo	Middle exon	16.0497	1
Gut	AKA-017	FBtr0290035	TRINITY_DN787_c0_g1_i40	FBtr0290035	FBgn0000289	roo	Middle exon	20.0105	1
Gut	AKA-017	FBtr0290035	TRINITY_DN787_c0_g1_i40	FBtr0290035	FBgn0000289	roo	Last exon	20.0105	1
Gut	AKA-017	FBtr0299564	TRINITY_DN3275_c0_g3_i1	FBtr0299564	FBgn0039479	jockey	Last exon	45.7195	0.999942
Gut	AKA-017	FBtr0299564	TRINITY_DN3275_c0_g3_i2	MSTRG.10526.1	FBgn0039479	jockey	Last exon	7.52157	0.749171
Gut	AKA-017	FBtr0299789	TRINITY_DN1663_c0_g1_i4	FBtr0299789	FBgn0259227	roo	Middle exon	34.3505	1
Gut	AKA-017	FBtr0300502	TRINITY_DN1372_c1_g1_i2	FBtr0300502	FBgn0259978	INE-1	Last exon	4.19368	0.999949
Gut	AKA-017	FBtr0300997	TRINITY_DN2290_c0_g2_i1	FBtr0300997	FBgn0052772	INE-1	Last exon	14.3839	0.999952
Gut	AKA-017	FBtr0300997	TRINITY_DN2290_c0_g2_i1	FBtr0300997	FBgn0052772	roo	Middle exon	14.3839	0.999952
Gut	AKA-017	FBtr0301313	TRINITY_DN46_c0_g2_i3	FBtr0301313	FBgn0265991	roo	Middle exon	27.0703	1
Gut	AKA-017	FBtr0301449	TRINITY_DN878_c5_g1_i1	FBtr0301449	FBgn0030505	roo	First exon	37.2312	1
Gut	AKA-017	FBtr0301449	TRINITY_DN878_c5_g1_i1	FBtr0301449	FBgn0030505	roo	Middle exon	37.2312	1
Gut	AKA-017	FBtr0301780	TRINITY_DN3454_c0_g2_i1	FBtr0301780	FBgn0058263	Cr1a	Last exon	4.1136	0.968823
Gut	AKA-017	FBtr0301783	TRINITY_DN543_c0_g1_i7	FBtr0301783	FBgn0260008	FB4	Last exon	39.357	0.0645804
Gut	AKA-017	FBtr0301783	TRINITY_DN543_c0_g1_i7	FBtr0301783	FBgn0260008	Tc1-2	Last exon	39.357	0.0645804
Gut	AKA-017	FBtr0301785	TRINITY_DN543_c0_g1_i5	FBtr0301785	FBgn0260008	FB4	Last exon	2.04376	0.0587272
Gut	AKA-017	FBtr0301785	TRINITY_DN543_c0_g1_i5	FBtr0301785	FBgn0260008	Tc1-2	Last exon	2.04376	0.0587272
Gut	AKA-017	FBtr0302023	TRINITY_DN5529_c0_g1_i1	FBtr0302023	FBgn0039054	roo	Middle exon	5.85177	0.999976
Gut	AKA-017	FBtr0302297	TRINITY_DN257_c1_g1_i3	FBtr0302297	FBgn0243516	roo	Middle exon	7.64959	0.999998
Gut	AKA-017	FBtr0302651	TRINITY_DN6354_c0_g1_i5	FBtr0302651	FBgn0261547	roo	Middle exon	20.6757	1
Gut	AKA-017	FBtr0302910	TRINITY_DN865_c0_g1_i2	FBtr0302910	FBgn0265298	roo	Last exon	31.2153	0.836981
Gut	AKA-017	FBtr0303272	TRINITY_DN964_c0_g1_i6	FBtr0303272	FBgn0261802	INE-1	Last exon	20.1683	1
Gut	AKA-017	FBtr0303273	TRINITY_DN964_c0_g1_i7	FBtr0303273	FBgn0261802	INE-1	Last exon	9.02473	1
Gut	AKA-017	FBtr0303434	TRINITY_DN635_c2_g1_i2	MSTRG.3854.2	FBgn0261854	roo	Middle exon	8.98709	0.99995
Gut	AKA-017	FBtr0303434	TRINITY_DN635_c2_g1_i5	MSTRG.3854.1	FBgn0261854	roo	Middle exon	11.8362	0.999941
Gut	AKA-017	FBtr0303434	TRINITY_DN635_c2_g1_i6	MSTRG.3854.4	FBgn0261854	roo	Middle exon	7.61186	0.99965
Gut	AKA-017	FBtr0303751	TRINITY_DN1176_c1_g1_i2	FBtr0303751	FBgn0261934	roo	Middle exon	6.59452	0.978833
Gut	AKA-017	FBtr0303751	TRINITY_DN1176_c1_g1_i2	FBtr0303751	FBgn0261934	roo	Last exon	6.59452	0.978833
Gut	AKA-017	FBtr0303861	TRINITY_DN635_c3_g1_i26	FBtr0303861	FBgn0262028	G5	Last exon	1.22184	0.000763453
Gut	AKA-017	FBtr0304582	TRINITY_DN6043_c2_g2_i6	FBtr0304582	FBgn0010015	roo	Last exon	3.75051	0.999996
Gut	AKA-017	FBtr0304978	TRINITY_DN4254_c0_g1_i4	FBtr0304978	FBgn0262532	INE-1	Middle exon	4.73201	0.633768
Gut	AKA-017	FBtr0304978	TRINITY_DN4254_c0_g1_i4	FBtr0304978	FBgn0262532	hopper2	First exon	4.73201	0.633768
Gut	AKA-017	FBtr0304978	TRINITY_DN4254_c0_g1_i4	FBtr0304978	FBgn0262532	hopper2	Middle exon	4.73201	0.633768
Gut	AKA-017	FBtr0304978	TRINITY_DN4254_c0_g1_i4	FBtr0304978	FBgn0262532	hopper2	Last exon	4.73201	0.633768
Gut	AKA-017	FBtr0305333	TRINITY_DN924_c0_g2_i6	FBtr0305333	FBgn0086358	roo	Last exon	2.26911	1
Gut	AKA-017	FBtr0305620	TRINITY_DN4986_c0_g1_i4	FBtr0305620	FBgn0045852	roo	Last exon	9.60292	1
Gut	AKA-017	FBtr0305621	TRINITY_DN4986_c0_g1_i2	FBtr0305621	FBgn0045852	roo	Last exon	10.6326	1
Gut	AKA-017	FBtr0306031	TRINITY_DN2180_c0_g2_i1	FBtr0306031	FBgn0032908	INE-1	Last exon	26.8768	1
Gut	AKA-017	FBtr0306252	TRINITY_DN865_c0_g1_i1	FBtr0306252	FBgn0265298	roo	Last exon	72.3611	0.739488
Gut	AKA-017	FBtr0306295	TRINITY_DN637_c1_g1_i4	FBtr0306295	FBgn0262886	INE-1	Last exon	19.5688	0.0431644
Gut	AKA-017	FBtr0306297	TRINITY_DN637_c1_g1_i3	FBtr0306297	FBgn0262886	INE-1	Last exon	32.1837	0.0436112
Gut	AKA-017	FBtr0306591	TRINITY_DN904_c0_g1_i8	FBtr0306591	FBgn0002121	INE-1	Last exon	39.8327	1
Gut	AKA-017	FBtr0306591	TRINITY_DN904_c0_g1_i8	FBtr0306591	FBgn0002121	Idefix	Last exon	39.8327	1
Gut	AKA-017	FBtr0306592	TRINITY_DN904_c0_g1_i4	MSTRG.2.1	FBgn0002121	INE-1	Last exon	37.168	1
Gut	AKA-017	FBtr0306592	TRINITY_DN904_c0_g1_i4	MSTRG.2.1	FBgn0002121	Idefix	Last exon	37.168	1
Gut	AKA-017	FBtr0307068	TRINITY_DN119_c0_g1_i2	FBtr0079175	FBgn0001942	blood	Last exon	1.68708	0.999694
Gut	AKA-017	FBtr0308254	TRINITY_DN47_c4_g1_i6	FBtr0308254	FBgn0266557	roo	First exon	10.4433	1
Gut	AKA-017	FBtr0309250	TRINITY_DN557_c1_g1_i17	FBtr0309250	FBgn0030087	roo	Middle exon	13.4827	1
Gut	AKA-017	FBtr0309857	TRINITY_DN7090_c0_g5_i1	FBtr0309857	FBgn0086408	INE-1	Last exon	18.895	1
Gut	AKA-017	FBtr0310277	TRINITY_DN5343_c0_g1_i2	FBtr0310277	FBgn0262160	roo	Middle exon	12.5133	1
Gut	AKA-017	FBtr0310443	TRINITY_DN2778_c0_g1_i2	FBtr0310443	FBgn0026878	roo	Last exon	18.9807	0.692872
Gut	AKA-017	FBtr0329829	TRINITY_DN4688_c0_g1_i1	FBtr0329829	FBgn0250830	1360	Last exon	73.5145	0.999991
Gut	AKA-017	FBtr0330001	TRINITY_DN224_c2_g3_i1	FBtr0330001	FBgn0034301	roo	Last exon	12.9237	1
Gut	AKA-017	FBtr0330044	TRINITY_DN3219_c1_g2_i1	FBtr0330044	FBgn0261285	Bari1	Last exon	49.5915	0.900874
Gut	AKA-017	FBtr0330085	TRINITY_DN129_c1_g1_i1	FBtr0085220	FBgn0045862	roo	Last exon	76.3243	1
Gut	AKA-017	FBtr0330714	TRINITY_DN2_c0_g1_i22	FBtr0330714	FBgn0015000	INE-1	Last exon	5.72354	0.985105
Gut	AKA-017	FBtr0331378	TRINITY_DN726_c0_g1_i7	FBtr0081507	FBgn0032910	INE-1	Last exon	68.7742	0.998907
Gut	AKA-017	FBtr0331397	TRINITY_DN3808_c0_g1_i4	FBtr0331397	FBgn0037206	roo	Last exon	3.15449	0.999351
Gut	AKA-017	FBtr0331398	TRINITY_DN3808_c0_g1_i1	FBtr0331398	FBgn0037206	roo	Middle exon	1.1198	0.999505
Gut	AKA-017	FBtr0331616	TRINITY_DN1344_c1_g1_i1	FBtr0331616	FBgn0032850	INE-1	Middle exon	1.53783	0.978997
Gut	AKA-017	FBtr0331657	TRINITY_DN3128_c0_g1_i1	FBtr0331656	FBgn0032974	INE-1	Last exon	12.4331	0.999994
Gut	AKA-017	FBtr0331744	TRINITY_DN1013_c0_g1_i5	FBtr0331744	FBgn0024251	roo	First exon	45.0741	1
Gut	AKA-017	FBtr0331780	TRINITY_DN3689_c0_g1_i7	FBtr0331780	FBgn0024804	gypsy10	Last exon	5.43143	0.91736
Gut	AKA-017	FBtr0331925	TRINITY_DN924_c0_g2_i5	FBtr0331925	FBgn0086358	roo	Middle exon	3.82365	1
Gut	AKA-017	FBtr0332017	TRINITY_DN4986_c0_g1_i1	FBtr0332017	FBgn0045852	roo	Last exon	3.27494	1
Gut	AKA-017	FBtr0332087	TRINITY_DN1299_c3_g1_i1	FBtr0332087	FBgn0036285	roo	First exon	3.35338	0.999956
Gut	AKA-017	FBtr0332105	TRINITY_DN2547_c0_g1_i3	MSTRG.7811.8	FBgn0052451	INE-1	Last exon	8.92155	1
Gut	AKA-017	FBtr0332105	TRINITY_DN2547_c0_g1_i6	MSTRG.7811.2	FBgn0052451	INE-1	Last exon	3.09364	1
Gut	AKA-017	FBtr0332105	TRINITY_DN2547_c0_g1_i9	MSTRG.7811.7	FBgn0052451	INE-1	Last exon	7.67947	1
Gut	AKA-017	FBtr0332233	TRINITY_DN290_c0_g1_i13	FBtr0332233	FBgn0262475	roo	Middle exon	16.756	1
Gut	AKA-017	FBtr0332234	TRINITY_DN290_c0_g1_i6	FBtr0332234	FBgn0262475	roo	Middle exon	10.7678	0.99996
Gut	AKA-017	FBtr0332656	TRINITY_DN995_c0_g1_i2	FBtr0332656	FBgn0043458	1360	Last exon	49.6176	1
Gut	AKA-017	FBtr0332851	TRINITY_DN205_c2_g1_i2	FBtr0332851	FBgn0017418	1360	Last exon	51.3692	0.999821
Gut	AKA-017	FBtr0333042	TRINITY_DN2106_c1_g1_i3	FBtr0333042	FBgn0003459	Stalker4	Last exon	5.34823	1
Gut	AKA-017	FBtr0333189	TRINITY_DN3866_c0_g1_i1	FBtr0333189	FBgn0058198	INE-1	Last exon	37.708	0.435021
Gut	AKA-017	FBtr0333218	TRINITY_DN47_c9_g1_i1	FBtr0072464	FBgn0020386	roo	Middle exon	82.4164	1
Gut	AKA-017	FBtr0333244	TRINITY_DN4642_c0_g1_i1	FBtr0333244	FBgn0264548	INE-1	First exon	9.20173	0.031945
Gut	AKA-017	FBtr0333266	TRINITY_DN796_c0_g1_i2	FBtr0333266	FBgn0052479	pogo	Last exon	37.7106	0.999993
Gut	AKA-017	FBtr0333266	TRINITY_DN796_c0_g1_i2	FBtr0333266	FBgn0052479	roo	First exon	37.7106	0.999993
Gut	AKA-017	FBtr0333291	TRINITY_DN2585_c0_g1_i2	FBtr0333291	FBgn0010280	roo	Middle exon	3.90731	1
Gut	AKA-017	FBtr0333745	TRINITY_DN964_c0_g1_i9	FBtr0333745	FBgn0261802	INE-1	Last exon	4.00743	1
Gut	AKA-017	FBtr0333873	TRINITY_DN543_c0_g1_i3	FBtr0333873	FBgn0260008	FB4	Last exon	5.44436	0.0328971
Gut	AKA-017	FBtr0333873	TRINITY_DN543_c0_g1_i3	FBtr0333873	FBgn0260008	Tc1-2	Last exon	5.44436	0.0328971
Gut	AKA-017	FBtr0334112	TRINITY_DN2102_c0_g1_i2	FBtr0334112	FBgn0264727	INE-1	Unique	40.0909	0.00131655
Gut	AKA-017	FBtr0334934	TRINITY_DN4926_c1_g1_i3	FBtr0334934	FBgn0287182	jockey2	Last exon	16.5325	0.0196347
Gut	AKA-017	FBtr0335138	TRINITY_DN695_c2_g2_i1	FBtr0080883	FBgn0001185	INE-1	Last exon	70.6521	0.999851
Gut	AKA-017	FBtr0335266	TRINITY_DN1054_c0_g1_i21	FBtr0335266	FBgn0033047	INE-1	Last exon	5.48114	0.967279
Gut	AKA-017	FBtr0335285	TRINITY_DN1911_c0_g1_i3	FBtr0085972	FBgn0033050	INE-1	Middle exon	1.62688	0.999575
Gut	AKA-017	FBtr0335427	TRINITY_DN5481_c4_g1_i1	FBtr0083220	FBgn0003117	roo	Last exon	8.42833	0.99941
Gut	AKA-017	FBtr0336467	TRINITY_DN175_c1_g1_i7	MSTRG.9499.3	FBgn0042693	roo	Middle exon	3.41589	0.999992
Gut	AKA-017	FBtr0336467	TRINITY_DN175_c1_g1_i9	MSTRG.9499.1	FBgn0042693	roo	Middle exon	40.0085	0.999995
Gut	AKA-017	FBtr0336616	TRINITY_DN5343_c0_g1_i11	FBtr0336616	FBgn0262160	roo	Middle exon	3.34727	1
Gut	AKA-017	FBtr0336617	TRINITY_DN5343_c0_g1_i1	MSTRG.1539.2	FBgn0262160	roo	Middle exon	6.29348	1
Gut	AKA-017	FBtr0336876	TRINITY_DN444_c0_g1_i1	FBtr0336876	FBgn0011217	roo	Middle exon	82.6167	0.311489
Gut	AKA-017	FBtr0336876	TRINITY_DN444_c0_g1_i1	FBtr0336876	FBgn0011217	roo	Last exon	82.6167	0.311489
Gut	AKA-017	FBtr0336925	TRINITY_DN3073_c0_g1_i2	FBtr0336925	FBgn0033185	1360	Last exon	17.2426	0.999982
Gut	AKA-017	FBtr0339121	TRINITY_DN1264_c0_g2_i3	FBtr0339121	FBgn0050377	roo	Middle exon	22.6644	1
Gut	AKA-017	FBtr0339549	TRINITY_DN38_c2_g1_i9	MSTRG.412.1	FBgn0020445	roo	First exon	12.6274	1
Gut	AKA-017	FBtr0339576	TRINITY_DN466_c0_g1_i18	FBtr0339576	FBgn0026872	LARD	First exon	11.8619	0.901058
Gut	AKA-017	FBtr0339612	TRINITY_DN1193_c0_g1_i1	FBtr0084990	FBgn0039419	roo	Unique	36.4822	0.999999
Gut	AKA-017	FBtr0339962	TRINITY_DN787_c0_g1_i12	FBtr0339962	FBgn0000289	roo	Middle exon	14.6325	0.999995
Gut	AKA-017	FBtr0339962	TRINITY_DN787_c0_g1_i12	FBtr0339962	FBgn0000289	roo	Last exon	14.6325	0.999995
Gut	AKA-017	FBtr0340000	TRINITY_DN407_c0_g1_i3	FBtr0340000	FBgn0034010	INE-1	Last exon	17.7796	0.822132
Gut	AKA-017	FBtr0340020	TRINITY_DN1337_c0_g1_i2	FBtr0340020	FBgn0034071	roo	Middle exon	10.9664	1
Gut	AKA-017	FBtr0340488	TRINITY_DN5710_c2_g1_i1	FBtr0340488	FBgn0265630	roo	Middle exon	28.9138	1
Gut	AKA-017	FBtr0340540	TRINITY_DN1598_c1_g1_i3	FBtr0080392	FBgn0004394	roo	First exon	21.2775	1
Gut	AKA-017	FBtr0342796	TRINITY_DN1067_c1_g1_i5	FBtr0342796	FBgn0015524	roo	Middle exon	15.1043	0.954488
Gut	AKA-017	FBtr0343030	TRINITY_DN4305_c0_g1_i1	FBtr0343030	FBgn0026415	INE-1	Last exon	87.1894	0.999934
Gut	AKA-017	FBtr0343305	TRINITY_DN4274_c1_g1_i3	FBtr0343305	FBgn0266044	Gypsy-1_Dsim	Unique	2.71154	0.0341118
Gut	AKA-017	FBtr0343564	TRINITY_DN443_c0_g1_i4	FBtr0070122	FBgn0025638	roo	Last exon	43.0505	0.812116
Gut	AKA-017	FBtr0343825	TRINITY_DN3896_c0_g1_i1	FBtr0343825	FBgn0032688	roo	Last exon	3.29805	1
Gut	AKA-017	FBtr0344027	TRINITY_DN4642_c0_g1_i2	FBtr0344027	FBgn0264548	INE-1	Unique	2.78021	0.00941935
Gut	AKA-017	FBtr0344093	TRINITY_DN3982_c0_g1_i2	FBtr0344093	FBgn0260987	INE-1	Last exon	4.32668	0.999962
Gut	AKA-017	FBtr0344456	TRINITY_DN965_c0_g2_i1	FBtr0344456	FBgn0266456	INE-1	Unique	10.708	0.409783
Gut	AKA-017	FBtr0344752	TRINITY_DN148_c1_g1_i3	FBtr0344752	FBgn0266579	roo	First exon	13.6735	0.996525
Gut	AKA-017	FBtr0345028	TRINITY_DN4618_c0_g1_i2	MSTRG.5619.2	FBgn0035388	roo	Middle exon	89.2853	0.999877
Gut	AKA-017	FBtr0345054	TRINITY_DN4147_c0_g1_i3	FBtr0345054	FBgn0266687	Cr1a	Last exon	1.73287	0.0978852
Gut	AKA-017	FBtr0345054	TRINITY_DN4147_c0_g1_i3	FBtr0345054	FBgn0266687	gypsy8	First exon	1.73287	0.0978852
Gut	AKA-017	FBtr0345085	TRINITY_DN495_c1_g1_i4	FBtr0345085	FBgn0266696	roo	First exon	11.2171	1
Gut	AKA-017	FBtr0345153	TRINITY_DN791_c3_g1_i1	FBtr0345153	FBgn0266697	INE-1	Middle exon	11.3205	0.0301473
Gut	AKA-017	FBtr0345153	TRINITY_DN791_c3_g1_i1	FBtr0345153	FBgn0266697	INE-1	Last exon	11.3205	0.0301473
Gut	AKA-017	FBtr0345227	TRINITY_DN662_c5_g1_i1	FBtr0345227	FBgn0000659	roo	Unique	60.0239	0.99925
Gut	AKA-017	FBtr0345418	TRINITY_DN750_c1_g1_i1	FBtr0086921	FBgn0028953	roo	Last exon	90.3533	0.999176
Gut	AKA-017	FBtr0345598	TRINITY_DN320_c0_g1_i3	FBtr0345598	FBgn0004861	gypsy11	First exon	15.8236	1
Gut	AKA-017	FBtr0345598	TRINITY_DN320_c0_g1_i3	FBtr0345598	FBgn0004861	roo	Middle exon	15.8236	1
Gut	AKA-017	FBtr0345638	TRINITY_DN320_c1_g1_i2	FBtr0079429	FBgn0051908	roo	Last exon	92.0757	0.999123
Gut	AKA-017	FBtr0345806	TRINITY_DN56_c1_g1_i1	FBtr0075098	FBgn0042134	roo	Last exon	92.2069	1
Gut	AKA-017	FBtr0346819	TRINITY_DN1800_c0_g1_i2	FBtr0346819	FBgn0037098	roo	Middle exon	1.73057	1
Gut	AKA-017	FBtr0347015	TRINITY_DN7149_c0_g2_i3	FBtr0347015	FBgn0267585	Stalker	Unique	3.41149	0.0256688
Gut	AKA-017	FBtr0347016	TRINITY_DN7149_c0_g2_i4	FBtr0347016	FBgn0267585	Stalker	First exon	2.83014	0.0277015
Gut	AKA-017	FBtr0415455	TRINITY_DN1281_c0_g1_i6	FBtr0415455	FBgn0278598	INE-1	Last exon	3.12326	0.0145614
Gut	AKA-017	FBtr0415458	TRINITY_DN1281_c0_g1_i4	FBtr0415458	FBgn0278598	INE-1	Last exon	21.0994	0.977304
Gut	AKA-017	FBtr0433504	TRINITY_DN575_c1_g3_i1	FBtr0433504	FBgn0030311	pogo	Last exon	92.815	0.958492
Gut	AKA-017	FBtr0452132	TRINITY_DN6983_c2_g1_i1	FBtr0452132	FBgn0284232	roo	Middle exon	14.325	1
Gut	AKA-017	FBtr0473619	TRINITY_DN5063_c0_g1_i3	FBtr0473619	FBgn0036220	INE-1	Last exon	4.81494	0.987546
Gut	AKA-017	FBtr0475062	TRINITY_DN6043_c3_g2_i1	FBtr0475062	FBgn0286884	INE-1	Last exon	3.66436	0.0367264
Gut	JUT-011	FBtr0070042	TRINITY_DN1894_c0_g1_i14	FBtr0070042	FBgn0264492	1360	Last exon	40.4392	0.938308
Gut	JUT-011	FBtr0070042	TRINITY_DN1894_c0_g1_i14	FBtr0070042	FBgn0264492	hopper2	Last exon	40.4392	0.938308
Gut	JUT-011	FBtr0070043	TRINITY_DN1894_c0_g1_i11	FBtr0070043	FBgn0264492	1360	Last exon	9.77287	0.936325
Gut	JUT-011	FBtr0070043	TRINITY_DN1894_c0_g1_i11	FBtr0070043	FBgn0264492	hopper2	Last exon	9.77287	0.936325
Gut	JUT-011	FBtr0070044	TRINITY_DN1894_c0_g1_i6	FBtr0070044	FBgn0264492	1360	Last exon	8.30532	0.94657
Gut	JUT-011	FBtr0070044	TRINITY_DN1894_c0_g1_i6	FBtr0070044	FBgn0264492	hopper2	Last exon	8.30532	0.94657
Gut	JUT-011	FBtr0070046	TRINITY_DN687_c0_g1_i4	FBtr0070046	FBgn0052350	1360	Unique	20.8268	0.999997
Gut	JUT-011	FBtr0070528	TRINITY_DN5436_c0_g1_i2	FBtr0070528	FBgn0029662	roo	Middle exon	2.98772	0.999978
Gut	JUT-011	FBtr0070669	TRINITY_DN2687_c1_g1_i1	FBtr0070669	FBgn0026079	hopper2	Last exon	88.5426	1
Gut	JUT-011	FBtr0070680	TRINITY_DN132_c2_g2_i1	FBtr0070680	FBgn0003053	roo	Last exon	57.316	1
Gut	JUT-011	FBtr0070829	TRINITY_DN2232_c0_g1_i1	FBtr0070829	FBgn0014340	G5A	Unique	24.2932	1
Gut	JUT-011	FBtr0071342	TRINITY_DN1520_c0_g1_i1	FBtr0071342	FBgn0030096	INE-1	Last exon	81.8241	0.999981
Gut	JUT-011	FBtr0071379	TRINITY_DN5002_c0_g1_i1	FBtr0071379	FBgn0000233	roo	First exon	9.70586	0.999995
Gut	JUT-011	FBtr0071464	TRINITY_DN3496_c0_g2_i1	FBtr0071464	FBgn0030202	Gypsy-2_Dsim	Unique	7.60325	0.646692
Gut	JUT-011	FBtr0071792	TRINITY_DN87_c4_g1_i3	FBtr0071792	FBgn0243516	roo	Middle exon	30.6535	0.99998
Gut	JUT-011	FBtr0071811	TRINITY_DN2565_c0_g1_i1	MSTRG.4805.2	FBgn0034717	LARD	Last exon	26.3497	1
Gut	JUT-011	FBtr0071811	TRINITY_DN2565_c0_g1_i3	MSTRG.4805.3	FBgn0034717	LARD	Last exon	45.2132	1
Gut	JUT-011	FBtr0072261	TRINITY_DN1737_c1_g2_i2	FBtr0072261	FBgn0034988	INE-1	Unique	73.391	0.996654
Gut	JUT-011	FBtr0072272	TRINITY_DN2854_c0_g1_i1	FBtr0339359	FBgn0005638	roo	Unique	14.6355	0.999847
Gut	JUT-011	FBtr0072451	TRINITY_DN1055_c0_g1_i15	FBtr0072451	FBgn0050428	INE-1	Last exon	32.6064	0.701697
Gut	JUT-011	FBtr0072578	TRINITY_DN151_c10_g1_i1	FBtr0072578	FBgn0000575	roo	First exon	86.8366	0.931203
Gut	JUT-011	FBtr0072601	TRINITY_DN1205_c0_g3_i1	FBtr0072601	FBgn0035160	roo	Last exon	62.0038	0.998164
Gut	JUT-011	FBtr0072711	TRINITY_DN687_c1_g3_i1	FBtr0072711	FBgn0043458	1360	Last exon	21.5143	1
Gut	JUT-011	FBtr0073152	TRINITY_DN562_c1_g1_i1	FBtr0073152	FBgn0004875	roo	Middle exon	16.901	1
Gut	JUT-011	FBtr0073153	TRINITY_DN562_c1_g1_i4	FBtr0073153	FBgn0004875	roo	Middle exon	3.82312	1
Gut	JUT-011	FBtr0073573	TRINITY_DN71_c2_g1_i1	MSTRG.12186.2	FBgn0260780	roo	Middle exon	70.5404	1
Gut	JUT-011	FBtr0073841	TRINITY_DN8649_c0_g1_i3	FBtr0073841	FBgn0001612	roo	Middle exon	14.1059	1
Gut	JUT-011	FBtr0073975	TRINITY_DN11366_c0_g1_i1	FBtr0073975	FBgn0030597	LARD	Unique	43.2044	0.999992
Gut	JUT-011	FBtr0074634	TRINITY_DN600_c0_g1_i7	FBtr0074634	FBgn0283473	roo	First exon	48.6469	0.999879
Gut	JUT-011	FBtr0074696	TRINITY_DN6317_c2_g1_i1	FBtr0074696	FBgn0030995	INE-1	Unique	29.2267	0.998178
Gut	JUT-011	FBtr0074747	TRINITY_DN1945_c0_g1_i3	FBtr0344152	FBgn0031054	G5A	Last exon	22.8181	0.92895
Gut	JUT-011	FBtr0075171	TRINITY_DN1189_c0_g1_i3	FBtr0075171	FBgn0052190	roo	Last exon	89.6844	0.999995
Gut	JUT-011	FBtr0075285	TRINITY_DN2607_c4_g1_i2	FBtr0075285	FBgn0260943	roo	Last exon	0.99366	0.992925
Gut	JUT-011	FBtr0075330	TRINITY_DN3832_c0_g1_i1	FBtr0075330	FBgn0036668	roo	Last exon	60.2019	1
Gut	JUT-011	FBtr0075580	TRINITY_DN528_c3_g2_i1	FBtr0075580	FBgn0041160	roo	Last exon	70.4341	0.995448
Gut	JUT-011	FBtr0075708	TRINITY_DN411_c2_g1_i1	FBtr0075708	FBgn0013263	roo	Last exon	38.6148	0.999832
Gut	JUT-011	FBtr0076369	TRINITY_DN949_c2_g2_i1	FBtr0076369	FBgn0015618	roo	Last exon	33.3677	0.999766
Gut	JUT-011	FBtr0077267	TRINITY_DN2089_c0_g1_i2	MSTRG.13048.1	FBgn0031144	Tc3	Last exon	30.6411	0.999726
Gut	JUT-011	FBtr0077557	TRINITY_DN701_c1_g4_i1	FBtr0077557	FBgn0002985	roo	Last exon	79.7394	0.998787
Gut	JUT-011	FBtr0077570	TRINITY_DN2929_c0_g1_i4	FBtr0077570	FBgn0005616	INE-1	Last exon	11.2421	1
Gut	JUT-011	FBtr0077571	TRINITY_DN2929_c0_g1_i3	FBtr0077571	FBgn0005616	INE-1	Last exon	6.7604	1
Gut	JUT-011	FBtr0078154	TRINITY_DN2541_c0_g1_i3	FBtr0078154	FBgn0025683	Quasimodo2	Middle exon	17.3409	0.999998
Gut	JUT-011	FBtr0078307	TRINITY_DN4001_c0_g1_i1	FBtr0078307	FBgn0004865	roo	Middle exon	9.31456	0.989636
Gut	JUT-011	FBtr0078354	TRINITY_DN3513_c0_g1_i2	FBtr0078354	FBgn0037090	INE-1	First exon	82.9404	0.999947
Gut	JUT-011	FBtr0078394	TRINITY_DN14131_c0_g1_i1	FBtr0078394	FBgn0037085	Cr1a	Last exon	10.48	0.989218
Gut	JUT-011	FBtr0078396	TRINITY_DN8228_c0_g1_i1	FBtr0078396	FBgn0283479	Tc1	Last exon	7.95517	0.999955
Gut	JUT-011	FBtr0078454	TRINITY_DN3888_c7_g1_i1	FBtr0078454	FBgn0037126	INE-1	Unique	51.933	0.629818
Gut	JUT-011	FBtr0078495	TRINITY_DN758_c0_g1_i10	FBtr0078495	FBgn0004179	roo	Middle exon	12.0448	0.808202
Gut	JUT-011	FBtr0078787	TRINITY_DN23229_c0_g1_i1	FBtr0078787	FBgn0003275	roo	Last exon	113.644	0.943036
Gut	JUT-011	FBtr0078907	TRINITY_DN382_c0_g1_i2	FBtr0078907	FBgn0037234	INE-1	First exon	3.38118	0.997023
Gut	JUT-011	FBtr0079057	TRINITY_DN1030_c0_g1_i10	FBtr0079057	FBgn0031652	INE-1	Last exon	12.9098	0.97667
Gut	JUT-011	FBtr0079176	TRINITY_DN1440_c0_g1_i2	FBtr0079176	FBgn0001942	blood	Middle exon	19.7273	0.999764
Gut	JUT-011	FBtr0079178	TRINITY_DN1440_c0_g1_i4	FBtr0079178	FBgn0001942	blood	Middle exon	39.9099	0.999737
Gut	JUT-011	FBtr0079472	TRINITY_DN7655_c0_g1_i1	FBtr0079472	FBgn0031926	blood	Last exon	3.5732	1
Gut	JUT-011	FBtr0080189	TRINITY_DN2853_c0_g1_i2	FBtr0080189	FBgn0051869	roo	Last exon	22.1191	0.999999
Gut	JUT-011	FBtr0080200	TRINITY_DN647_c5_g1_i2	FBtr0080200	FBgn0032348	roo	Last exon	29.4569	1
Gut	JUT-011	FBtr0080315	TRINITY_DN1978_c0_g2_i1	FBtr0080315	FBgn0042127	roo	Last exon	95.8848	0.9968
Gut	JUT-011	FBtr0081005	TRINITY_DN513_c0_g2_i53	FBtr0081005	FBgn0260632	roo	Middle exon	59.6238	0.999999
Gut	JUT-011	FBtr0081070	TRINITY_DN4765_c0_g1_i2	FBtr0081070	FBgn0032688	roo	Last exon	30.4513	1
Gut	JUT-011	FBtr0081145	TRINITY_DN2123_c0_g1_i3	FBtr0081145	FBgn0263198	blood	Last exon	8.5367	0.999999
Gut	JUT-011	FBtr0081156	TRINITY_DN705_c1_g1_i1	FBtr0081156	FBgn0086445	gypsy8	Last exon	26.0307	0.99983
Gut	JUT-011	FBtr0081488	TRINITY_DN7617_c0_g1_i1	FBtr0081488	FBgn0032934	INE-1	Unique	15.326	0.999998
Gut	JUT-011	FBtr0083165	TRINITY_DN1834_c0_g1_i1	FBtr0083165	FBgn0038354	roo	Last exon	63.9154	0.999987
Gut	JUT-011	FBtr0083218	TRINITY_DN166_c5_g1_i4	FBtr0083218	FBgn0038391	roo	Middle exon	81.8244	0.999999
Gut	JUT-011	FBtr0083353	TRINITY_DN4727_c0_g1_i1	FBtr0083353	FBgn0051217	INE-1	First exon	27.4878	0.999985
Gut	JUT-011	FBtr0083553	TRINITY_DN995_c1_g1_i4	FBtr0083553	FBgn0042693	roo	Middle exon	24.8681	0.999995
Gut	JUT-011	FBtr0083661	TRINITY_DN1523_c0_g1_i1	FBtr0083661	FBgn0044871	roo	Last exon	91.8386	0.983212
Gut	JUT-011	FBtr0083913	TRINITY_DN6010_c0_g1_i1	FBtr0083913	FBgn0038815	roo	Middle exon	7.68585	0.999986
Gut	JUT-011	FBtr0083914	TRINITY_DN3373_c0_g1_i3	FBtr0083916	FBgn0001169	roo	Middle exon	13.4657	1
Gut	JUT-011	FBtr0083915	TRINITY_DN3373_c0_g1_i2	FBtr0083915	FBgn0001169	roo	Middle exon	13.368	1
Gut	JUT-011	FBtr0083917	TRINITY_DN3373_c0_g1_i1	FBtr0083917	FBgn0001169	roo	First exon	3.52816	1
Gut	JUT-011	FBtr0083978	TRINITY_DN5142_c0_g1_i4	FBtr0083978	FBgn0038840	INE-1	Last exon	0.829957	1
Gut	JUT-011	FBtr0084674	TRINITY_DN1205_c2_g2_i2	FBtr0084674	FBgn0039209	roo	Middle exon	1.01051	0.999999
Gut	JUT-011	FBtr0084898	TRINITY_DN34_c0_g1_i5	FBtr0084898	FBgn0261986	roo	Middle exon	45.6636	0.999977
Gut	JUT-011	FBtr0085221	TRINITY_DN166_c4_g2_i2	FBtr0085221	FBgn0045862	roo	Unique	4.60237	1
Gut	JUT-011	FBtr0085355	TRINITY_DN3447_c1_g1_i1	FBtr0085355	FBgn0039601	roo	Last exon	88.9924	0.999994
Gut	JUT-011	FBtr0085720	TRINITY_DN140_c0_g1_i1	FBtr0085720	FBgn0011739	roo	Middle exon	50.0008	1
Gut	JUT-011	FBtr0085877	TRINITY_DN2225_c0_g1_i1	FBtr0085877	FBgn0040206	INE-1	Last exon	48.4358	0.982515
Gut	JUT-011	FBtr0085957	TRINITY_DN4016_c0_g1_i2	FBtr0085957	FBgn0039972	297	First exon	5.21349	1
Gut	JUT-011	FBtr0086079	TRINITY_DN515_c0_g3_i1	MSTRG.2608.1	FBgn0033010	INE-1	Last exon	6.06909	0.965001
Gut	JUT-011	FBtr0086081	TRINITY_DN515_c0_g3_i4	FBtr0086081	FBgn0033010	INE-1	Last exon	49.1361	0.999982
Gut	JUT-011	FBtr0086516	TRINITY_DN2538_c0_g1_i3	FBtr0086516	FBgn0086358	roo	Middle exon	67.5199	1
Gut	JUT-011	FBtr0086582	TRINITY_DN2848_c0_g1_i2	FBtr0086582	FBgn0000578	roo	Middle exon	14.7021	0.999984
Gut	JUT-011	FBtr0086583	TRINITY_DN2848_c0_g1_i3	FBtr0086583	FBgn0000578	roo	Middle exon	9.46752	0.999991
Gut	JUT-011	FBtr0086584	TRINITY_DN2848_c0_g1_i5	FBtr0086584	FBgn0000578	roo	Middle exon	2.82417	1
Gut	JUT-011	FBtr0087115	TRINITY_DN1137_c0_g2_i1	FBtr0087115	FBgn0024315	S-element	First exon	9.33741	0.999943
Gut	JUT-011	FBtr0087242	TRINITY_DN455_c1_g1_i1	FBtr0087242	FBgn0034087	INE-1	Last exon	70.8516	1
Gut	JUT-011	FBtr0087257	TRINITY_DN117_c2_g2_i1	FBtr0087257	FBgn0034072	roo	Last exon	59.2822	1
Gut	JUT-011	FBtr0087315	TRINITY_DN219_c0_g1_i4	MSTRG.3937.5	FBgn0265991	roo	Middle exon	48.4639	1
Gut	JUT-011	FBtr0087369	TRINITY_DN663_c0_g1_i3	FBtr0087369	FBgn0286785	INE-1	Last exon	5.17843	1
Gut	JUT-011	FBtr0087370	TRINITY_DN663_c0_g1_i1	FBtr0087370	FBgn0286785	INE-1	Last exon	91.3725	1
Gut	JUT-011	FBtr0087601	TRINITY_DN1578_c0_g2_i1	FBtr0087601	FBgn0040752	roo	Last exon	2.53297	1
Gut	JUT-011	FBtr0088487	TRINITY_DN266_c0_g2_i1	FBtr0088487	FBgn0033448	roo	First exon	28.2043	0.999926
Gut	JUT-011	FBtr0088748	TRINITY_DN3689_c1_g1_i10	FBtr0088748	FBgn0033294	S-element	Middle exon	16.6214	0.999988
Gut	JUT-011	FBtr0088748	TRINITY_DN3689_c1_g1_i10	FBtr0088748	FBgn0033294	S-element	Last exon	16.6214	0.999988
Gut	JUT-011	FBtr0089052	TRINITY_DN16516_c0_g1_i1	FBtr0089052	FBgn0002930	roo	Middle exon	99.7568	0.999979
Gut	JUT-011	FBtr0089261	TRINITY_DN3694_c0_g1_i2	MSTRG.12590.4	FBgn0278608	roo	Middle exon	7.56392	0.948331
Gut	JUT-011	FBtr0089261	TRINITY_DN3694_c0_g1_i4	MSTRG.12590.2	FBgn0278608	roo	Middle exon	12.4122	0.954514
Gut	JUT-011	FBtr0089479	TRINITY_DN1355_c1_g1_i26	FBtr0089479	FBgn0036640	TART-A	Middle exon	31.1708	1
Gut	JUT-011	FBtr0089479	TRINITY_DN1355_c1_g1_i26	FBtr0089479	FBgn0036640	TART-A	Last exon	31.1708	1
Gut	JUT-011	FBtr0100174	TRINITY_DN2848_c0_g1_i1	FBtr0100174	FBgn0000578	roo	Middle exon	19.7011	0.999991
Gut	JUT-011	FBtr0100375	TRINITY_DN884_c1_g1_i1	FBtr0100375	FBgn0261873	roo	Middle exon	11.2096	1
Gut	JUT-011	FBtr0100407	TRINITY_DN1944_c0_g1_i5	FBtr0100407	FBgn0032979	INE-1	Last exon	10.6172	0.998086
Gut	JUT-011	FBtr0100444	TRINITY_DN411_c2_g1_i4	FBtr0100444	FBgn0013263	roo	Last exon	6.35812	0.999846
Gut	JUT-011	FBtr0110772	TRINITY_DN935_c2_g2_i1	FBtr0110772	FBgn0015524	roo	Middle exon	27.0046	0.97284
Gut	JUT-011	FBtr0110795	TRINITY_DN1205_c2_g2_i3	FBtr0110795	FBgn0039209	roo	Middle exon	45.8903	1
Gut	JUT-011	FBtr0111111	TRINITY_DN4578_c0_g1_i1	MSTRG.2585.1	FBgn0046692	Gypsy-1_Dsim	Last exon	7.74849	0.116767
Gut	JUT-011	FBtr0111111	TRINITY_DN4578_c0_g1_i2	FBtr0308810	FBgn0046692	Gypsy-1_Dsim	Last exon	80.9044	0.84131
Gut	JUT-011	FBtr0111123	TRINITY_DN2299_c0_g1_i11	FBtr0111123	FBgn0002566	Gypsy-1_Dsim	Last exon	3.12445	0.973916
Gut	JUT-011	FBtr0111123	TRINITY_DN2299_c0_g1_i11	FBtr0111123	FBgn0002566	Gypsy-26_Dya	Last exon	3.12445	0.973916
Gut	JUT-011	FBtr0111123	TRINITY_DN2299_c0_g1_i11	FBtr0111123	FBgn0002566	INE-1	First exon	3.12445	0.973916
Gut	JUT-011	FBtr0111123	TRINITY_DN2299_c0_g1_i11	FBtr0111123	FBgn0002566	INE-1	Last exon	3.12445	0.973916
Gut	JUT-011	FBtr0111123	TRINITY_DN2299_c0_g1_i11	FBtr0111123	FBgn0002566	S-element	First exon	3.12445	0.973916
Gut	JUT-011	FBtr0111123	TRINITY_DN2299_c0_g1_i11	FBtr0111123	FBgn0002566	gypsy8	Last exon	3.12445	0.973916
Gut	JUT-011	FBtr0111298	TRINITY_DN555_c0_g1_i1	FBtr0111298	FBgn0262115	INE-1	Last exon	37.8858	0.997551
Gut	JUT-011	FBtr0111298	TRINITY_DN555_c0_g1_i1	FBtr0111298	FBgn0262115	gypsy2	Last exon	37.8858	0.997551
Gut	JUT-011	FBtr0111299	TRINITY_DN555_c0_g1_i6	MSTRG.2577.1	FBgn0262115	INE-1	Last exon	8.27114	0.65728
Gut	JUT-011	FBtr0111299	TRINITY_DN555_c0_g1_i6	MSTRG.2577.1	FBgn0262115	gypsy2	Last exon	8.27114	0.65728
Gut	JUT-011	FBtr0111300	TRINITY_DN555_c0_g1_i3	FBtr0111300	FBgn0262115	INE-1	Last exon	14.9253	0.989626
Gut	JUT-011	FBtr0111300	TRINITY_DN555_c0_g1_i3	FBtr0111300	FBgn0262115	gypsy2	Last exon	14.9253	0.989626
Gut	JUT-011	FBtr0112639	TRINITY_DN1440_c1_g1_i11	FBtr0112639	FBgn0085423	412	Last exon	19.8126	1
Gut	JUT-011	FBtr0112827	TRINITY_DN111_c0_g1_i6	FBtr0112827	FBgn0003345	roo	Last exon	1.8982	0.970412
Gut	JUT-011	FBtr0112845	TRINITY_DN562_c1_g1_i6	FBtr0112845	FBgn0004875	roo	Middle exon	0.998996	1
Gut	JUT-011	FBtr0112868	TRINITY_DN2977_c0_g1_i4	MSTRG.12600.3	FBgn0011742	INE-1	Last exon	10.4344	0.99797
Gut	JUT-011	FBtr0113067	TRINITY_DN295_c0_g1_i6	FBtr0113067	FBgn0033639	roo	First exon	4.19846	0.997272
Gut	JUT-011	FBtr0113134	TRINITY_DN4176_c0_g1_i2	FBtr0113134	FBgn0263239	roo	Middle exon	5.85904	0.999999
Gut	JUT-011	FBtr0113197	TRINITY_DN1499_c0_g2_i11	FBtr0113197	FBgn0037386	INE-1	Last exon	1.57963	0.995525
Gut	JUT-011	FBtr0113257	TRINITY_DN195_c0_g1_i2	MSTRG.9787.1	FBgn0038842	INE-1	Middle exon	22.3476	0.987867
Gut	JUT-011	FBtr0113352	TRINITY_DN2899_c2_g1_i58	MSTRG.10340.1	FBgn0045761	Doc	Middle exon	74.4126	0.999989
Gut	JUT-011	FBtr0113701	TRINITY_DN3465_c1_g1_i20	FBtr0113701	FBgn0003256	diver2	Last exon	7.47213	0.214777
Gut	JUT-011	FBtr0113761	TRINITY_DN515_c0_g1_i10	MSTRG.2540.3	FBgn0039993	INE-1	Middle exon	14.8732	0.00553933
Gut	JUT-011	FBtr0113830	TRINITY_DN5005_c0_g1_i10	MSTRG.2539.5	FBgn0267861	INE-1	Last exon	6.11558	0.285144
Gut	JUT-011	FBtr0113895	TRINITY_DN4798_c0_g1_i1	FBtr0113895	FBgn0263977	INE-1	Last exon	102.333	0.611167
Gut	JUT-011	FBtr0290076	TRINITY_DN670_c1_g1_i2	FBtr0290076	FBgn0001297	roo	First exon	16.2541	0.999999
Gut	JUT-011	FBtr0290246	TRINITY_DN2853_c0_g1_i1	FBtr0290246	FBgn0051869	roo	Last exon	14.5386	1
Gut	JUT-011	FBtr0299743	TRINITY_DN1180_c0_g1_i11	FBtr0299743	FBgn0265998	roo	First exon	4.1558	0.999997
Gut	JUT-011	FBtr0299789	TRINITY_DN1616_c1_g3_i2	FBtr0299789	FBgn0259227	roo	Middle exon	47.9576	1
Gut	JUT-011	FBtr0299879	TRINITY_DN1267_c0_g3_i2	FBtr0299879	FBgn0032981	Gypsy-2_Dsim	Last exon	8.56482	0.998791
Gut	JUT-011	FBtr0300123	TRINITY_DN2653_c0_g1_i3	FBtr0300123	FBgn0014135	roo	Middle exon	12.0008	0.999995
Gut	JUT-011	FBtr0301151	TRINITY_DN3652_c0_g1_i1	FBtr0301151	FBgn0020880	roo	Unique	6.05314	0.999999
Gut	JUT-011	FBtr0301519	TRINITY_DN2333_c2_g1_i1	FBtr0301519	FBgn0261526	roo	First exon	3.24437	1
Gut	JUT-011	FBtr0301520	TRINITY_DN2333_c2_g1_i2	FBtr0301520	FBgn0261526	roo	First exon	2.13891	0.999636
Gut	JUT-011	FBtr0301783	TRINITY_DN674_c0_g1_i31	FBtr0301783	FBgn0260008	FB4	Last exon	34.6616	0.0547032
Gut	JUT-011	FBtr0301783	TRINITY_DN674_c0_g1_i31	FBtr0301783	FBgn0260008	Tc1-2	Last exon	34.6616	0.0547032
Gut	JUT-011	FBtr0301785	TRINITY_DN674_c0_g1_i19	FBtr0301785	FBgn0260008	Tc1-2	Last exon	5.65791	0.987166
Gut	JUT-011	FBtr0302500	TRINITY_DN1582_c0_g1_i3	FBtr0302500	FBgn0030040	HB	First exon	11.672	0.897677
Gut	JUT-011	FBtr0302651	TRINITY_DN2052_c0_g1_i5	FBtr0302651	FBgn0261547	roo	Middle exon	44.3906	1
Gut	JUT-011	FBtr0302910	TRINITY_DN1312_c0_g1_i2	FBtr0302910	FBgn0265298	roo	Last exon	33.6439	0.860345
Gut	JUT-011	FBtr0303271	TRINITY_DN4969_c0_g1_i7	FBtr0303271	FBgn0261802	INE-1	Last exon	16.0458	1
Gut	JUT-011	FBtr0303272	TRINITY_DN4969_c0_g1_i12	FBtr0303272	FBgn0261802	INE-1	Last exon	31.9411	1
Gut	JUT-011	FBtr0303272	TRINITY_DN4969_c0_g1_i12	FBtr0303272	FBgn0261802	INE-1	First exon	31.9411	1
Gut	JUT-011	FBtr0303273	TRINITY_DN4969_c0_g1_i2	FBtr0303273	FBgn0261802	INE-1	Last exon	10.6146	1
Gut	JUT-011	FBtr0303273	TRINITY_DN4969_c0_g1_i2	FBtr0303273	FBgn0261802	INE-1	First exon	10.6146	1
Gut	JUT-011	FBtr0303434	TRINITY_DN194_c0_g1_i2	MSTRG.3854.4	FBgn0261854	roo	Middle exon	22.4082	0.999755
Gut	JUT-011	FBtr0303434	TRINITY_DN194_c0_g1_i4	MSTRG.3854.3	FBgn0261854	roo	Middle exon	15.4564	0.999962
Gut	JUT-011	FBtr0303434	TRINITY_DN194_c0_g1_i5	MSTRG.3854.1	FBgn0261854	roo	Middle exon	14.3882	0.99995
Gut	JUT-011	FBtr0303434	TRINITY_DN194_c0_g1_i6	MSTRG.3854.2	FBgn0261854	roo	Middle exon	13.7429	0.999958
Gut	JUT-011	FBtr0303454	TRINITY_DN1616_c1_g8_i1	FBtr0303454	FBgn0004369	roo	Last exon	66.3922	1
Gut	JUT-011	FBtr0303882	TRINITY_DN2333_c1_g1_i3	MSTRG.1216.3	FBgn0051755	Bari1	Last exon	4.14318	0.539909
Gut	JUT-011	FBtr0304739	TRINITY_DN1267_c0_g3_i1	FBtr0304739	FBgn0032981	Gypsy-2_Dsim	Last exon	3.44001	0.950187
Gut	JUT-011	FBtr0304887	TRINITY_DN169_c0_g1_i7	MSTRG.571.1	FBgn0000286	roo	Middle exon	4.05814	0.999288
Gut	JUT-011	FBtr0304887	TRINITY_DN169_c0_g1_i9	FBtr0304887	FBgn0000286	roo	First exon	5.08791	0.998148
Gut	JUT-011	FBtr0304975	TRINITY_DN1077_c0_g1_i2	FBtr0304975	FBgn0036534	roo	Last exon	69.9277	0.999985
Gut	JUT-011	FBtr0305011	TRINITY_DN4329_c0_g1_i9	FBtr0305011	FBgn0262562	roo	First exon	1.59495	1
Gut	JUT-011	FBtr0305082	TRINITY_DN411_c4_g1_i3	FBtr0305082	FBgn0033313	roo	Middle exon	44.2667	1
Gut	JUT-011	FBtr0305183	TRINITY_DN1462_c1_g1_i11	FBtr0305183	FBgn0026083	INE-1	Last exon	2.36491	1
Gut	JUT-011	FBtr0305333	TRINITY_DN2538_c0_g1_i1	FBtr0305333	FBgn0086358	roo	Middle exon	3.63335	1
Gut	JUT-011	FBtr0305620	TRINITY_DN1205_c1_g2_i1	FBtr0305620	FBgn0045852	roo	Last exon	19.3474	1
Gut	JUT-011	FBtr0305946	TRINITY_DN1926_c1_g1_i33	FBtr0305946	FBgn0261698	roo	First exon	10.3578	1
Gut	JUT-011	FBtr0306031	TRINITY_DN2058_c0_g1_i2	FBtr0306031	FBgn0032908	INE-1	Last exon	10.9476	1
Gut	JUT-011	FBtr0306172	TRINITY_DN250_c2_g1_i1	FBtr0306172	FBgn0039214	roo	Middle exon	3.35493	1
Gut	JUT-011	FBtr0306235	TRINITY_DN4016_c0_g1_i1	MSTRG.2486.2	FBgn0039972	297	First exon	74.9435	1
Gut	JUT-011	FBtr0306252	TRINITY_DN1312_c0_g1_i3	FBtr0306252	FBgn0265298	roo	Last exon	72.5102	0.773037
Gut	JUT-011	FBtr0306295	TRINITY_DN3001_c0_g2_i1	FBtr0306295	FBgn0262886	INE-1	Last exon	15.4436	0.0240409
Gut	JUT-011	FBtr0306297	TRINITY_DN3001_c0_g2_i4	FBtr0306297	FBgn0262886	INE-1	Last exon	13.3488	0.0332277
Gut	JUT-011	FBtr0306314	TRINITY_DN4278_c0_g1_i6	FBtr0306314	FBgn0262901	INE-1	First exon	4.78388	0.031468
Gut	JUT-011	FBtr0306314	TRINITY_DN4278_c0_g1_i6	FBtr0306314	FBgn0262901	INE-1	Middle exon	4.78388	0.031468
Gut	JUT-011	FBtr0306315	TRINITY_DN4278_c0_g1_i1	FBtr0306315	FBgn0262901	INE-1	First exon	1.5307	0.0115113
Gut	JUT-011	FBtr0306331	TRINITY_DN2952_c1_g1_i3	MSTRG.5603.2	FBgn0052296	roo	Middle exon	8.01745	1
Gut	JUT-011	FBtr0306331	TRINITY_DN2952_c1_g1_i3	MSTRG.5603.2	FBgn0052296	roo	Last exon	8.01745	1
Gut	JUT-011	FBtr0306592	TRINITY_DN657_c0_g2_i6	MSTRG.2.2	FBgn0002121	INE-1	Last exon	82.4179	1
Gut	JUT-011	FBtr0306742	TRINITY_DN5372_c0_g1_i36	FBtr0306742	FBgn0024321	roo	Middle exon	6.50514	0.999997
Gut	JUT-011	FBtr0307068	TRINITY_DN1440_c0_g1_i5	FBtr0079175	FBgn0001942	blood	Last exon	44.4916	0.999723
Gut	JUT-011	FBtr0308255	TRINITY_DN1234_c1_g1_i2	FBtr0308255	FBgn0266557	roo	First exon	2.6253	1
Gut	JUT-011	FBtr0309217	TRINITY_DN606_c4_g1_i1	FBtr0309217	FBgn0031060	INE-1	Last exon	51.2541	0.999701
Gut	JUT-011	FBtr0310277	TRINITY_DN235_c9_g2_i1	FBtr0310277	FBgn0262160	roo	Middle exon	27.6425	1
Gut	JUT-011	FBtr0310423	TRINITY_DN1024_c2_g1_i16	FBtr0310423	FBgn0050389	roo	Last exon	2.23709	1
Gut	JUT-011	FBtr0310423	TRINITY_DN1024_c2_g1_i16	FBtr0310423	FBgn0050389	roo	Middle exon	2.23709	1
Gut	JUT-011	FBtr0310448	TRINITY_DN411_c4_g1_i4	MSTRG.2996.3	FBgn0033313	roo	Middle exon	22.1809	1
Gut	JUT-011	FBtr0329829	TRINITY_DN2343_c0_g1_i12	FBtr0329829	FBgn0250830	1360	Last exon	88.0158	0.999992
Gut	JUT-011	FBtr0330085	TRINITY_DN166_c4_g2_i1	FBtr0085220	FBgn0045862	roo	Last exon	77.2205	1
Gut	JUT-011	FBtr0330261	TRINITY_DN3030_c0_g1_i3	FBtr0330261	FBgn0263993	roo	Last exon	9.30664	0.999989
Gut	JUT-011	FBtr0331378	TRINITY_DN2221_c0_g1_i16	FBtr0081507	FBgn0032910	INE-1	Middle exon	22.0169	0.946528
Gut	JUT-011	FBtr0331464	TRINITY_DN4078_c0_g1_i1	FBtr0306248	FBgn0022987	roo	Last exon	44.7987	0.995753
Gut	JUT-011	FBtr0331515	TRINITY_DN1024_c3_g1_i4	FBtr0474158	FBgn0264307	roo	Last exon	2.3988	0.999994
Gut	JUT-011	FBtr0331657	TRINITY_DN3001_c0_g1_i2	FBtr0331656	FBgn0032974	INE-1	Last exon	19.0535	0.999992
Gut	JUT-011	FBtr0331925	TRINITY_DN2538_c0_g1_i2	FBtr0331925	FBgn0086358	roo	Middle exon	13.0905	1
Gut	JUT-011	FBtr0331970	TRINITY_DN1641_c0_g2_i4	FBtr0331970	FBgn0033029	INE-1	Last exon	80.112	0.999999
Gut	JUT-011	FBtr0332232	TRINITY_DN683_c0_g1_i12	FBtr0332232	FBgn0262475	roo	Middle exon	16.9428	0.999996
Gut	JUT-011	FBtr0332652	TRINITY_DN163_c0_g1_i28	FBtr0332652	FBgn0036134	roo	Middle exon	59.9426	0.999998
Gut	JUT-011	FBtr0332656	TRINITY_DN687_c1_g3_i2	FBtr0332656	FBgn0043458	1360	Last exon	56.5111	1
Gut	JUT-011	FBtr0332738	TRINITY_DN4209_c0_g1_i1	FBtr0332738	FBgn0035574	roo	First exon	13.7962	1
Gut	JUT-011	FBtr0332851	TRINITY_DN1197_c2_g1_i11	FBtr0332851	FBgn0017418	1360	Last exon	14.351	0.999784
Gut	JUT-011	FBtr0333218	TRINITY_DN763_c0_g1_i12	FBtr0072464	FBgn0020386	roo	Middle exon	46.2313	1
Gut	JUT-011	FBtr0333328	TRINITY_DN977_c0_g1_i1	FBtr0333328	FBgn0039858	roo	First exon	3.27567	0.998353
Gut	JUT-011	FBtr0333331	TRINITY_DN2067_c1_g1_i2	FBtr0333331	FBgn0041210	roo	First exon	32.9764	1
Gut	JUT-011	FBtr0333745	TRINITY_DN4969_c0_g1_i3	FBtr0333745	FBgn0261802	INE-1	Last exon	6.3997	1
Gut	JUT-011	FBtr0333745	TRINITY_DN4969_c0_g1_i3	FBtr0333745	FBgn0261802	INE-1	First exon	6.3997	1
Gut	JUT-011	FBtr0333873	TRINITY_DN674_c0_g1_i42	FBtr0333873	FBgn0260008	FB4	Last exon	27.6796	0.035389
Gut	JUT-011	FBtr0333873	TRINITY_DN674_c0_g1_i42	FBtr0333873	FBgn0260008	Tc1-2	Last exon	27.6796	0.035389
Gut	JUT-011	FBtr0334112	TRINITY_DN680_c2_g4_i1	FBtr0334112	FBgn0264727	INE-1	Unique	30.4908	0.00249514
Gut	JUT-011	FBtr0334498	TRINITY_DN1463_c0_g1_i1	MSTRG.10034.2	FBgn0004882	roo	Middle exon	56.2877	1
Gut	JUT-011	FBtr0334559	TRINITY_DN2580_c0_g1_i3	MSTRG.9955.2	FBgn0051158	roo	Middle exon	2.55965	1
Gut	JUT-011	FBtr0334747	TRINITY_DN758_c0_g1_i1	FBtr0334747	FBgn0004179	roo	Middle exon	23.6538	0.702694
Gut	JUT-011	FBtr0334934	TRINITY_DN1745_c0_g1_i3	FBtr0334934	FBgn0287182	jockey2	Last exon	11.996	0.013867
Gut	JUT-011	FBtr0335016	TRINITY_DN5142_c0_g1_i1	FBtr0335016	FBgn0038840	INE-1	Last exon	7.30033	1
Gut	JUT-011	FBtr0335023	TRINITY_DN437_c12_g1_i1	FBtr0335023	FBgn0031059	Tc1	First exon	67.1384	0.466577
Gut	JUT-011	FBtr0335138	TRINITY_DN130_c0_g4_i1	FBtr0080883	FBgn0001185	INE-1	Last exon	74.1106	0.999847
Gut	JUT-011	FBtr0335266	TRINITY_DN817_c0_g1_i8	FBtr0335266	FBgn0033047	INE-1	First exon	6.42081	0.95505
Gut	JUT-011	FBtr0335266	TRINITY_DN817_c0_g1_i8	FBtr0335266	FBgn0033047	INE-1	Last exon	6.42081	0.95505
Gut	JUT-011	FBtr0335289	TRINITY_DN4405_c0_g1_i1	FBtr0335289	FBgn0033051	INE-1	Last exon	70.3653	0.999859
Gut	JUT-011	FBtr0336459	TRINITY_DN993_c1_g1_i4	FBtr0336459	FBgn0051145	roo	Middle exon	10.8902	0.99983
Gut	JUT-011	FBtr0336461	TRINITY_DN1180_c0_g1_i3	FBtr0336461	FBgn0265998	roo	First exon	3.23831	0.947513
Gut	JUT-011	FBtr0336467	TRINITY_DN995_c1_g1_i2	MSTRG.9499.1	FBgn0042693	roo	Middle exon	29.9297	0.999995
Gut	JUT-011	FBtr0336467	TRINITY_DN995_c1_g1_i3	MSTRG.9499.2	FBgn0042693	roo	Middle exon	17.6252	0.999993
Gut	JUT-011	FBtr0336480	TRINITY_DN2672_c1_g1_i2	FBtr0336480	FBgn0037228	INE-1	Last exon	43.9155	0.999081
Gut	JUT-011	FBtr0336617	TRINITY_DN235_c9_g2_i4	MSTRG.1539.2	FBgn0262160	roo	Middle exon	11.6572	1
Gut	JUT-011	FBtr0336842	TRINITY_DN2123_c0_g1_i1	FBtr0081144	FBgn0263198	blood	Last exon	76.3894	0.999999
Gut	JUT-011	FBtr0336925	TRINITY_DN6964_c0_g1_i1	FBtr0336925	FBgn0033185	1360	Last exon	31.0372	0.999979
Gut	JUT-011	FBtr0336925	TRINITY_DN6964_c0_g1_i1	FBtr0336925	FBgn0033185	Stalker4	Last exon	31.0372	0.999979
Gut	JUT-011	FBtr0339573	TRINITY_DN5328_c2_g2_i1	FBtr0339573	FBgn0265370	Gypsy-2_Dsim	Unique	7.94848	0.00579977
Gut	JUT-011	FBtr0339717	TRINITY_DN3092_c0_g1_i10	FBtr0339717	FBgn0039688	roo	Middle exon	2.34762	1
Gut	JUT-011	FBtr0339732	TRINITY_DN14502_c0_g1_i1	FBtr0339732	FBgn0265422	INE-1	Unique	3.84979	0.14199
Gut	JUT-011	FBtr0339894	TRINITY_DN3814_c0_g1_i3	FBtr0339894	FBgn0010215	INE-1	Middle exon	6.0083	0.998807
Gut	JUT-011	FBtr0340313	TRINITY_DN1775_c0_g3_i3	FBtr0340313	FBgn0004227	INE-1	Last exon	20.9224	0.824743
Gut	JUT-011	FBtr0340488	TRINITY_DN1533_c1_g2_i3	FBtr0340488	FBgn0265630	roo	Middle exon	13.233	1
Gut	JUT-011	FBtr0340613	TRINITY_DN6190_c0_g1_i9	FBtr0340613	FBgn0265705	G5A	Unique	18.4804	0.0898738
Gut	JUT-011	FBtr0342799	TRINITY_DN935_c2_g2_i2	FBtr0342799	FBgn0015524	roo	Middle exon	13.4529	0.994267
Gut	JUT-011	FBtr0343030	TRINITY_DN3855_c0_g1_i4	FBtr0343030	FBgn0026415	INE-1	Last exon	81.8421	0.99993
Gut	JUT-011	FBtr0343276	TRINITY_DN1316_c0_g1_i2	FBtr0343276	FBgn0025335	roo	Last exon	8.4053	0.999467
Gut	JUT-011	FBtr0343314	TRINITY_DN1091_c2_g5_i1	FBtr0343314	FBgn0004101	roo	First exon	44.8537	0.999816
Gut	JUT-011	FBtr0343533	TRINITY_DN2575_c0_g2_i4	FBtr0342951	FBgn0052772	INE-1	Last exon	34.0776	0.999185
Gut	JUT-011	FBtr0343556	TRINITY_DN744_c0_g4_i1	FBtr0343556	FBgn0266101	roo	Last exon	27.8974	0.999993
Gut	JUT-011	FBtr0343813	TRINITY_DN22531_c0_g1_i1	FBtr0343813	FBgn0266204	INE-1	Unique	4.15796	0.0720168
Gut	JUT-011	FBtr0343825	TRINITY_DN4765_c0_g1_i1	FBtr0343825	FBgn0032688	roo	Last exon	4.68928	1
Gut	JUT-011	FBtr0343830	TRINITY_DN588_c0_g1_i5	FBtr0343830	FBgn0085370	roo	Middle exon	27.2625	1
Gut	JUT-011	FBtr0344082	TRINITY_DN2299_c0_g1_i2	FBtr0111125	FBgn0002566	Gypsy-1_Dsim	Last exon	19.5457	0.999993
Gut	JUT-011	FBtr0344082	TRINITY_DN2299_c0_g1_i2	FBtr0111125	FBgn0002566	Gypsy-26_Dya	Last exon	19.5457	0.999993
Gut	JUT-011	FBtr0344082	TRINITY_DN2299_c0_g1_i2	FBtr0111125	FBgn0002566	INE-1	First exon	19.5457	0.999993
Gut	JUT-011	FBtr0344082	TRINITY_DN2299_c0_g1_i2	FBtr0111125	FBgn0002566	INE-1	Last exon	19.5457	0.999993
Gut	JUT-011	FBtr0344082	TRINITY_DN2299_c0_g1_i2	FBtr0111125	FBgn0002566	S-element	First exon	19.5457	0.999993
Gut	JUT-011	FBtr0344082	TRINITY_DN2299_c0_g1_i2	FBtr0111125	FBgn0002566	gypsy8	Last exon	19.5457	0.999993
Gut	JUT-011	FBtr0344456	TRINITY_DN14526_c0_g1_i1	FBtr0344456	FBgn0266456	INE-1	Unique	12.1339	0.463186
Gut	JUT-011	FBtr0344983	TRINITY_DN758_c0_g1_i9	FBtr0344983	FBgn0004179	roo	Middle exon	40.7275	0.870556
Gut	JUT-011	FBtr0345009	TRINITY_DN3725_c0_g1_i1	MSTRG.2604.1	FBgn0033005	INE-1	First exon	5.20746	1
Gut	JUT-011	FBtr0345028	TRINITY_DN3749_c0_g1_i7	MSTRG.5619.2	FBgn0035388	diver	Last exon	79.3583	0.999848
Gut	JUT-011	FBtr0345028	TRINITY_DN3749_c0_g1_i7	MSTRG.5619.2	FBgn0035388	roo	Middle exon	79.3583	0.999848
Gut	JUT-011	FBtr0345054	TRINITY_DN7996_c0_g1_i11	FBtr0345054	FBgn0266687	Cr1a	First exon	3.50951	0.0911857
Gut	JUT-011	FBtr0345054	TRINITY_DN7996_c0_g1_i11	FBtr0345054	FBgn0266687	Cr1a	Last exon	3.50951	0.0911857
Gut	JUT-011	FBtr0345138	TRINITY_DN1894_c0_g1_i12	FBtr0345138	FBgn0264492	1360	Last exon	2.32397	0.8955
Gut	JUT-011	FBtr0345138	TRINITY_DN1894_c0_g1_i12	FBtr0345138	FBgn0264492	hopper2	Last exon	2.32397	0.8955
Gut	JUT-011	FBtr0345153	TRINITY_DN3311_c0_g3_i1	FBtr0345153	FBgn0266697	INE-1	Last exon	8.75295	0.0418625
Gut	JUT-011	FBtr0345227	TRINITY_DN437_c9_g1_i2	FBtr0345227	FBgn0000659	roo	Unique	76.1884	0.999588
Gut	JUT-011	FBtr0345261	TRINITY_DN884_c0_g1_i1	FBtr0345261	FBgn0043884	roo	First exon	53.6052	1
Gut	JUT-011	FBtr0345417	TRINITY_DN869_c0_g1_i1	FBtr0345417	FBgn0028953	roo	Last exon	3.33521	0.997467
Gut	JUT-011	FBtr0345418	TRINITY_DN869_c0_g1_i2	FBtr0086921	FBgn0028953	roo	Last exon	87.7032	0.999089
Gut	JUT-011	FBtr0345517	TRINITY_DN1240_c0_g1_i1	FBtr0086985	FBgn0034198	Copia	Unique	69.7865	0.844125
Gut	JUT-011	FBtr0345638	TRINITY_DN1616_c5_g1_i1	FBtr0079429	FBgn0051908	roo	Last exon	100.172	0.999261
Gut	JUT-011	FBtr0345644	TRINITY_DN194_c12_g1_i1	FBtr0345644	FBgn0085415	roo	Middle exon	97.3073	0.999842
Gut	JUT-011	FBtr0345799	TRINITY_DN4975_c0_g1_i1	FBtr0345799	FBgn0033177	INE-1	Last exon	55.2924	0.999999
Gut	JUT-011	FBtr0346031	TRINITY_DN4752_c0_g3_i1	FBtr0346031	FBgn0267046	Stalker4	Middle exon	13.8836	0.144395
Gut	JUT-011	FBtr0346031	TRINITY_DN4752_c0_g3_i1	FBtr0346031	FBgn0267046	Stalker4	Last exon	13.8836	0.144395
Gut	JUT-011	FBtr0347293	TRINITY_DN331_c0_g2_i1	FBtr0347293	FBgn0267733	1360	Unique	22.324	0.0107006
Gut	JUT-011	FBtr0347293	TRINITY_DN331_c0_g2_i1	FBtr0347293	FBgn0267733	INE-1	Unique	22.324	0.0107006
Gut	JUT-011	FBtr0347293	TRINITY_DN331_c0_g2_i1	FBtr0347293	FBgn0267733	diver2	Unique	22.324	0.0107006
Gut	JUT-011	FBtr0347540	TRINITY_DN2827_c0_g1_i1	FBtr0346817	FBgn0037098	roo	Middle exon	16.695	1
Gut	JUT-011	FBtr0433504	TRINITY_DN2616_c0_g1_i10	FBtr0433504	FBgn0030311	pogo	Last exon	66.6086	0.958813
Gut	JUT-011	FBtr0452132	TRINITY_DN186_c2_g1_i1	FBtr0452132	FBgn0284232	roo	Last exon	3.52227	0.999997
Gut	JUT-011	FBtr0475316	TRINITY_DN4381_c0_g1_i1	FBtr0475316	FBgn0260721	INE-1	Unique	11.6032	0.140547
Gut	MUN-016	FBtr0070042	TRINITY_DN6980_c0_g1_i10	FBtr0070042	FBgn0264492	1360	Last exon	24.2282	0.923514
Gut	MUN-016	FBtr0070042	TRINITY_DN6980_c0_g1_i10	FBtr0070042	FBgn0264492	hopper2	Last exon	24.2282	0.923514
Gut	MUN-016	FBtr0070043	TRINITY_DN6980_c0_g1_i2	FBtr0070043	FBgn0264492	1360	Last exon	11.106	0.921096
Gut	MUN-016	FBtr0070043	TRINITY_DN6980_c0_g1_i2	FBtr0070043	FBgn0264492	hopper2	Last exon	11.106	0.921096
Gut	MUN-016	FBtr0070044	TRINITY_DN6980_c0_g1_i9	FBtr0070044	FBgn0264492	1360	Last exon	6.77161	0.933617
Gut	MUN-016	FBtr0070044	TRINITY_DN6980_c0_g1_i9	FBtr0070044	FBgn0264492	hopper2	Last exon	6.77161	0.933617
Gut	MUN-016	FBtr0070046	TRINITY_DN1693_c0_g1_i4	FBtr0070046	FBgn0052350	1360	Unique	41.7477	0.999997
Gut	MUN-016	FBtr0070351	TRINITY_DN782_c1_g1_i1	FBtr0070351	FBgn0023512	LARD	Last exon	59.5577	0.999999
Gut	MUN-016	FBtr0070396	TRINITY_DN804_c1_g1_i2	FBtr0070396	FBgn0000810	roo	First exon	36.6807	0.999506
Gut	MUN-016	FBtr0070669	TRINITY_DN2913_c1_g2_i1	FBtr0070669	FBgn0026079	hopper2	Last exon	66.328	1
Gut	MUN-016	FBtr0070680	TRINITY_DN463_c0_g2_i1	FBtr0070680	FBgn0003053	roo	Last exon	45.3951	1
Gut	MUN-016	FBtr0070829	TRINITY_DN2626_c0_g1_i1	FBtr0070829	FBgn0014340	G5A	Unique	21.3365	1
Gut	MUN-016	FBtr0071009	TRINITY_DN2438_c1_g1_i1	FBtr0343331	FBgn0029929	INE-1	Unique	72.9843	0.987785
Gut	MUN-016	FBtr0071068	TRINITY_DN4357_c0_g1_i3	FBtr0071068	FBgn0004198	roo	Middle exon	2.71603	1
Gut	MUN-016	FBtr0071068	TRINITY_DN4357_c0_g1_i3	FBtr0071068	FBgn0004198	roo	Last exon	2.71603	1
Gut	MUN-016	FBtr0071342	TRINITY_DN6403_c1_g1_i2	FBtr0071342	FBgn0030096	INE-1	Last exon	60.8296	0.999947
Gut	MUN-016	FBtr0071811	TRINITY_DN953_c0_g1_i10	MSTRG.4805.2	FBgn0034717	LARD	Last exon	21.9239	1
Gut	MUN-016	FBtr0071838	TRINITY_DN1096_c2_g2_i18	FBtr0071838	FBgn0003175	roo	Middle exon	12.2566	1
Gut	MUN-016	FBtr0072095	TRINITY_DN3952_c1_g1_i2	FBtr0072095	FBgn0011297	LARD	First exon	33.5646	0.999978
Gut	MUN-016	FBtr0072129	TRINITY_DN1601_c0_g1_i1	FBtr0072129	FBgn0011236	roo	Last exon	51.2566	0.99999
Gut	MUN-016	FBtr0072272	TRINITY_DN8296_c1_g1_i2	FBtr0339359	FBgn0005638	roo	Unique	18.2314	0.999865
Gut	MUN-016	FBtr0072328	TRINITY_DN207_c0_g2_i3	FBtr0072328	FBgn0035047	P-element	First exon	17.7457	0.999918
Gut	MUN-016	FBtr0072451	TRINITY_DN5822_c0_g1_i28	FBtr0072451	FBgn0050428	INE-1	Last exon	20.1386	0.720734
Gut	MUN-016	FBtr0072711	TRINITY_DN1067_c0_g1_i2	FBtr0072711	FBgn0043458	1360	Last exon	18.1899	1
Gut	MUN-016	FBtr0073145	TRINITY_DN5996_c0_g1_i1	MSTRG.5699.1	FBgn0014388	roo	Last exon	32.7974	0.999425
Gut	MUN-016	FBtr0073187	TRINITY_DN2565_c0_g1_i14	FBtr0073187	FBgn0052264	roo	Middle exon	10.8727	1
Gut	MUN-016	FBtr0073454	TRINITY_DN1359_c0_g3_i1	MSTRG.12107.1	FBgn0000499	roo	Unique	55.8786	0.999998
Gut	MUN-016	FBtr0073518	TRINITY_DN951_c0_g1_i13	FBtr0073519	FBgn0030318	Tom1	Last exon	58.8538	0.999129
Gut	MUN-016	FBtr0073591	TRINITY_DN699_c2_g1_i10	FBtr0073591	FBgn0030357	LARD	Middle exon	3.26876	0.678728
Gut	MUN-016	FBtr0073841	TRINITY_DN7973_c0_g1_i35	FBtr0073841	FBgn0001612	roo	Middle exon	6.34341	1
Gut	MUN-016	FBtr0073961	TRINITY_DN615_c0_g1_i13	FBtr0073961	FBgn0030607	pogo	Last exon	49.8506	0.999808
Gut	MUN-016	FBtr0074174	TRINITY_DN1462_c2_g2_i3	MSTRG.12534.2	FBgn0026076	roo	First exon	45.9189	0.974566
Gut	MUN-016	FBtr0074276	TRINITY_DN931_c4_g1_i4	MSTRG.12607.5	FBgn0026575	roo	First exon	13.291	1
Gut	MUN-016	FBtr0074359	TRINITY_DN9546_c0_g1_i14	FBtr0074359	FBgn0027528	jockey2	Last exon	10.7024	1
Gut	MUN-016	FBtr0074675	TRINITY_DN1251_c2_g1_i2	FBtr0074675	FBgn0031003	INE-1	First exon	7.77588	0.994054
Gut	MUN-016	FBtr0074690	TRINITY_DN1251_c2_g1_i3	FBtr0074690	FBgn0031004	INE-1	Last exon	3.5602	0.999672
Gut	MUN-016	FBtr0074696	TRINITY_DN6643_c2_g4_i1	FBtr0074696	FBgn0030995	INE-1	Unique	20.0213	0.998021
Gut	MUN-016	FBtr0074721	TRINITY_DN6149_c0_g1_i13	FBtr0074721	FBgn0031023	roo	Middle exon	10.9912	1
Gut	MUN-016	FBtr0074721	TRINITY_DN6149_c0_g1_i8	MSTRG.12908.1	FBgn0031023	roo	Middle exon	4.80095	1
Gut	MUN-016	FBtr0074747	TRINITY_DN2821_c0_g1_i36	FBtr0344152	FBgn0031054	G5A	Last exon	2.86711	0.219768
Gut	MUN-016	FBtr0075171	TRINITY_DN3995_c0_g1_i1	FBtr0075171	FBgn0052190	roo	Last exon	74.6265	0.999995
Gut	MUN-016	FBtr0075290	TRINITY_DN13404_c0_g1_i1	FBtr0075290	FBgn0011293	Gypsy-24_Dya	First exon	6.91234	0.933252
Gut	MUN-016	FBtr0075330	TRINITY_DN6115_c0_g1_i1	FBtr0075330	FBgn0036668	roo	Last exon	51.0055	1
Gut	MUN-016	FBtr0076001	TRINITY_DN1049_c0_g1_i19	FBtr0076001	FBgn0027843	INE-1	Last exon	9.3576	0.403081
Gut	MUN-016	FBtr0076368	TRINITY_DN4035_c0_g1_i2	FBtr0076368	FBgn0004390	roo	Last exon	24.1207	1
Gut	MUN-016	FBtr0076368	TRINITY_DN4035_c0_g1_i5	FBtr0330168	FBgn0004390	roo	Last exon	1.05154	1
Gut	MUN-016	FBtr0076413	TRINITY_DN385_c1_g2_i2	FBtr0076413	FBgn0040475	roo	Last exon	54.0083	0.999937
Gut	MUN-016	FBtr0076529	TRINITY_DN505_c3_g1_i10	FBtr0076529	FBgn0043806	jockey	Last exon	10.0354	0.999995
Gut	MUN-016	FBtr0076878	TRINITY_DN670_c0_g1_i3	FBtr0076878	FBgn0035769	Quasimodo	First exon	34.1856	1
Gut	MUN-016	FBtr0077267	TRINITY_DN5746_c0_g1_i3	MSTRG.13048.1	FBgn0031144	Tc3	Last exon	25.2281	0.999738
Gut	MUN-016	FBtr0077671	TRINITY_DN6382_c0_g1_i22	MSTRG.373.1	FBgn0031489	roo	Last exon	19.0525	0.966941
Gut	MUN-016	FBtr0077850	TRINITY_DN1019_c1_g1_i1	FBtr0077850	FBgn0000097	roo	Middle exon	41.6659	0.999986
Gut	MUN-016	FBtr0078088	TRINITY_DN723_c2_g1_i1	FBtr0078088	FBgn0015924	INE-1	First exon	1.174	0.999521
Gut	MUN-016	FBtr0078153	TRINITY_DN3180_c0_g1_i3	MSTRG.20.13	FBgn0025683	Quasimodo2	Middle exon	12.929	0.999998
Gut	MUN-016	FBtr0078160	TRINITY_DN9274_c2_g1_i1	FBtr0336838	FBgn0031219	INE-1	Unique	5.23101	0.555288
Gut	MUN-016	FBtr0078170	TRINITY_DN509_c0_g1_i6	FBtr0078170	FBgn0002121	INE-1	Last exon	16.8392	1
Gut	MUN-016	FBtr0078307	TRINITY_DN5108_c0_g1_i1	FBtr0078307	FBgn0004865	roo	Middle exon	5.93091	0.979381
Gut	MUN-016	FBtr0078350	TRINITY_DN37_c2_g1_i1	FBtr0078350	FBgn0005694	roo	First exon	10.1273	0.971081
Gut	MUN-016	FBtr0078354	TRINITY_DN2062_c0_g1_i2	FBtr0078354	FBgn0037090	1360	First exon	60.4573	0.999952
Gut	MUN-016	FBtr0078380	TRINITY_DN6615_c0_g1_i2	FBtr0078380	FBgn0037099	roo	First exon	16.408	0.999979
Gut	MUN-016	FBtr0078396	TRINITY_DN24977_c0_g1_i1	FBtr0078396	FBgn0283479	Tc1	Last exon	10.8416	0.999952
Gut	MUN-016	FBtr0078454	TRINITY_DN2049_c4_g1_i1	FBtr0078454	FBgn0037126	INE-1	Unique	41.8374	0.615381
Gut	MUN-016	FBtr0078538	TRINITY_DN8287_c0_g1_i1	FBtr0078538	FBgn0037183	1360	Unique	1.6244	0.956508
Gut	MUN-016	FBtr0078556	TRINITY_DN1074_c2_g1_i4	FBtr0078556	FBgn0037203	INE-1	First exon	25.0918	0.999994
Gut	MUN-016	FBtr0078961	TRINITY_DN1594_c0_g2_i1	MSTRG.7940.3	FBgn0037213	INE-1	Last exon	12.2756	0.999517
Gut	MUN-016	FBtr0078961	TRINITY_DN1594_c0_g2_i3	FBtr0078961	FBgn0037213	INE-1	Last exon	2.71955	0.999559
Gut	MUN-016	FBtr0078962	TRINITY_DN1594_c0_g1_i1	FBtr0078962	FBgn0037213	INE-1	Last exon	20.6649	0.999913
Gut	MUN-016	FBtr0079139	TRINITY_DN1415_c2_g1_i1	FBtr0079139	FBgn0031740	roo	Last exon	55.7764	0.999919
Gut	MUN-016	FBtr0079176	TRINITY_DN413_c2_g1_i4	FBtr0079176	FBgn0001942	blood	Middle exon	43.1119	0.99983
Gut	MUN-016	FBtr0079177	TRINITY_DN413_c2_g1_i1	FBtr0079177	FBgn0001942	blood	Last exon	17.3137	0.999274
Gut	MUN-016	FBtr0079356	TRINITY_DN6444_c1_g1_i1	FBtr0346716	FBgn0264922	mdg1	First exon	85.9484	0.878287
Gut	MUN-016	FBtr0080187	TRINITY_DN1212_c0_g2_i1	FBtr0080187	FBgn0032305	roo	First exon	76.4896	0.999983
Gut	MUN-016	FBtr0080624	TRINITY_DN1632_c0_g1_i2	FBtr0080624	FBgn0028916	INE-1	Last exon	52.9743	1
Gut	MUN-016	FBtr0080700	TRINITY_DN5380_c0_g1_i1	FBtr0346621	FBgn0004837	roo	First exon	18.7585	0.999979
Gut	MUN-016	FBtr0081070	TRINITY_DN5100_c0_g1_i3	FBtr0081070	FBgn0032688	roo	Last exon	28.4649	1
Gut	MUN-016	FBtr0081156	TRINITY_DN7985_c1_g1_i1	FBtr0081156	FBgn0086445	gypsy8	Last exon	27.975	0.999631
Gut	MUN-016	FBtr0081283	TRINITY_DN5378_c0_g1_i1	FBtr0081283	FBgn0032796	roo	First exon	3.00359	1
Gut	MUN-016	FBtr0081422	TRINITY_DN243_c0_g1_i42	FBtr0081422	FBgn0051673	INE-1	First exon	10.9987	0.933502
Gut	MUN-016	FBtr0081478	TRINITY_DN1663_c0_g2_i14	FBtr0081478	FBgn0261239	INE-1	Last exon	5.63348	0.999992
Gut	MUN-016	FBtr0081479	TRINITY_DN1663_c0_g2_i9	FBtr0081479	FBgn0261239	INE-1	Last exon	26.7001	0.999993
Gut	MUN-016	FBtr0081481	TRINITY_DN1663_c0_g2_i15	FBtr0081481	FBgn0261239	INE-1	Last exon	4.82667	0.999984
Gut	MUN-016	FBtr0081517	TRINITY_DN903_c0_g2_i9	FBtr0081517	FBgn0032945	INE-1	Last exon	11.9121	1
Gut	MUN-016	FBtr0081614	TRINITY_DN1759_c1_g1_i3	FBtr0081614	FBgn0261238	roo	Middle exon	10.8954	0.999999
Gut	MUN-016	FBtr0081614	TRINITY_DN1759_c1_g1_i3	FBtr0081614	FBgn0261238	roo	Last exon	10.8954	0.999999
Gut	MUN-016	FBtr0083218	TRINITY_DN98_c7_g1_i6	FBtr0083218	FBgn0038391	roo	First exon	64.9771	1
Gut	MUN-016	FBtr0083218	TRINITY_DN98_c7_g1_i6	FBtr0083218	FBgn0038391	roo	Middle exon	64.9771	1
Gut	MUN-016	FBtr0083552	TRINITY_DN935_c0_g1_i6	FBtr0083552	FBgn0042693	roo	Middle exon	7.88504	0.999996
Gut	MUN-016	FBtr0083553	TRINITY_DN935_c0_g1_i7	FBtr0083553	FBgn0042693	roo	Middle exon	24.5169	0.999995
Gut	MUN-016	FBtr0083917	TRINITY_DN2080_c0_g1_i1	FBtr0083917	FBgn0001169	roo	First exon	2.42076	0.999999
Gut	MUN-016	FBtr0084547	TRINITY_DN2000_c0_g1_i6	MSTRG.10138.1	FBgn0266673	INE-1	Last exon	23.3061	0.99997
Gut	MUN-016	FBtr0084687	TRINITY_DN6101_c2_g1_i1	FBtr0084687	FBgn0039217	roo	Middle exon	8.95629	0.999992
Gut	MUN-016	FBtr0085236	TRINITY_DN1502_c0_g1_i1	FBtr0085236	FBgn0039543	roo	Last exon	36.3635	0.999968
Gut	MUN-016	FBtr0085239	TRINITY_DN1502_c0_g1_i3	FBtr0085239	FBgn0039543	roo	Last exon	3.0294	0.999949
Gut	MUN-016	FBtr0085298	TRINITY_DN299_c0_g1_i38	MSTRG.10647.8	FBgn0001215	jockey	First exon	15.1147	0.984536
Gut	MUN-016	FBtr0085355	TRINITY_DN2362_c0_g1_i1	FBtr0085355	FBgn0039601	roo	Last exon	70.6747	0.999993
Gut	MUN-016	FBtr0085441	TRINITY_DN6305_c1_g1_i1	FBtr0085441	FBgn0000492	roo	First exon	20.0467	0.999971
Gut	MUN-016	FBtr0085718	TRINITY_DN3747_c1_g1_i1	FBtr0085718	FBgn0039807	roo	Unique	26.6821	0.998306
Gut	MUN-016	FBtr0085877	TRINITY_DN2120_c0_g2_i3	FBtr0085877	FBgn0040206	INE-1	Last exon	51.9087	0.980457
Gut	MUN-016	FBtr0085957	TRINITY_DN999_c0_g1_i2	FBtr0085957	FBgn0039972	297	First exon	23.0477	1
Gut	MUN-016	FBtr0086079	TRINITY_DN475_c1_g1_i4	MSTRG.2608.2	FBgn0033010	INE-1	Last exon	8.49755	0.970095
Gut	MUN-016	FBtr0086079	TRINITY_DN475_c1_g1_i6	MSTRG.2608.1	FBgn0033010	INE-1	Last exon	3.79821	0.971194
Gut	MUN-016	FBtr0086081	TRINITY_DN475_c1_g1_i1	FBtr0086081	FBgn0033010	INE-1	Last exon	54.4548	0.999983
Gut	MUN-016	FBtr0086089	TRINITY_DN5874_c0_g1_i2	FBtr0086089	FBgn0033020	NOF	First exon	1.75995	0.595371
Gut	MUN-016	FBtr0086133	TRINITY_DN3515_c0_g1_i1	FBtr0086133	FBgn0000473	INE-1	Last exon	48.3454	0.999878
Gut	MUN-016	FBtr0087236	TRINITY_DN564_c1_g1_i10	FBtr0087236	FBgn0015754	17-6	Last exon	10.2312	0.994666
Gut	MUN-016	FBtr0087242	TRINITY_DN564_c2_g1_i5	FBtr0087242	FBgn0034087	INE-1	Last exon	40.0189	1
Gut	MUN-016	FBtr0087257	TRINITY_DN602_c3_g1_i3	FBtr0087257	FBgn0034072	roo	Last exon	32.8373	1
Gut	MUN-016	FBtr0087279	TRINITY_DN700_c0_g1_i5	FBtr0087279	FBgn0050090	INE-1	First exon	25.5968	0.982834
Gut	MUN-016	FBtr0087315	TRINITY_DN505_c1_g1_i12	MSTRG.3937.5	FBgn0265991	roo	Middle exon	28.394	1
Gut	MUN-016	FBtr0087369	TRINITY_DN7045_c0_g1_i4	FBtr0087369	FBgn0286785	INE-1	Last exon	15.1033	1
Gut	MUN-016	FBtr0087370	TRINITY_DN7045_c0_g1_i2	FBtr0087370	FBgn0286785	INE-1	Last exon	54.3225	1
Gut	MUN-016	FBtr0087392	TRINITY_DN4643_c0_g1_i1	FBtr0087392	FBgn0034008	hopper2	Unique	51.9056	0.97218
Gut	MUN-016	FBtr0088094	TRINITY_DN928_c0_g2_i6	FBtr0088094	FBgn0033636	roo	First exon	8.41848	0.978762
Gut	MUN-016	FBtr0088242	TRINITY_DN551_c0_g1_i3	FBtr0088242	FBgn0050015	roo	Last exon	3.98478	1
Gut	MUN-016	FBtr0088487	TRINITY_DN1206_c1_g1_i6	FBtr0088487	FBgn0033448	roo	First exon	52.8346	0.999956
Gut	MUN-016	FBtr0089052	TRINITY_DN1784_c5_g1_i1	FBtr0089052	FBgn0002930	roo	Middle exon	76.2823	0.999976
Gut	MUN-016	FBtr0089678	TRINITY_DN134_c1_g1_i11	FBtr0089678	FBgn0003464	roo	Middle exon	7.8928	1
Gut	MUN-016	FBtr0091605	TRINITY_DN5390_c0_g1_i1	FBtr0091605	FBgn0065047	G5A	Unique	3.18046	0.119112
Gut	MUN-016	FBtr0100153	TRINITY_DN47_c2_g1_i3	FBtr0076569	FBgn0001168	roo	Last exon	12.3247	0.989968
Gut	MUN-016	FBtr0100375	TRINITY_DN6138_c0_g2_i6	FBtr0100375	FBgn0261873	roo	Middle exon	9.56073	1
Gut	MUN-016	FBtr0100407	TRINITY_DN3749_c0_g1_i7	FBtr0100407	FBgn0032979	INE-1	Last exon	12.8656	0.99765
Gut	MUN-016	FBtr0100511	TRINITY_DN5960_c0_g1_i28	FBtr0100511	FBgn0032955	INE-1	Last exon	4.25478	0.692296
Gut	MUN-016	FBtr0100586	TRINITY_DN1560_c0_g1_i3	FBtr0100586	FBgn0004227	INE-1	Last exon	7.75382	0.884714
Gut	MUN-016	FBtr0100599	TRINITY_DN7559_c0_g2_i1	FBtr0100599	FBgn0024251	roo	Middle exon	37.0256	0.999999
Gut	MUN-016	FBtr0100651	TRINITY_DN5733_c0_g1_i2	FBtr0100651	FBgn0031191	INE-1	Last exon	4.83597	0.999997
Gut	MUN-016	FBtr0110796	TRINITY_DN4674_c0_g1_i2	MSTRG.10203.2	FBgn0039209	roo	Middle exon	12.294	0.999993
Gut	MUN-016	FBtr0110796	TRINITY_DN4674_c0_g1_i5	MSTRG.10203.1	FBgn0039209	roo	Middle exon	6.30597	0.999992
Gut	MUN-016	FBtr0111111	TRINITY_DN7533_c0_g2_i1	MSTRG.2585.1	FBgn0046692	Gypsy-1_Dsim	Last exon	6.17402	0.111313
Gut	MUN-016	FBtr0111111	TRINITY_DN7533_c0_g2_i4	FBtr0308810	FBgn0046692	Gypsy-1_Dsim	Last exon	63.821	0.817442
Gut	MUN-016	FBtr0111123	TRINITY_DN413_c0_g1_i5	FBtr0111123	FBgn0002566	Gypsy-1_Dsim	Last exon	25.0961	0.97453
Gut	MUN-016	FBtr0111123	TRINITY_DN413_c0_g1_i5	FBtr0111123	FBgn0002566	Gypsy-26_Dya	Last exon	25.0961	0.97453
Gut	MUN-016	FBtr0111123	TRINITY_DN413_c0_g1_i5	FBtr0111123	FBgn0002566	INE-1	First exon	25.0961	0.97453
Gut	MUN-016	FBtr0111123	TRINITY_DN413_c0_g1_i5	FBtr0111123	FBgn0002566	INE-1	Last exon	25.0961	0.97453
Gut	MUN-016	FBtr0111123	TRINITY_DN413_c0_g1_i5	FBtr0111123	FBgn0002566	S-element	First exon	25.0961	0.97453
Gut	MUN-016	FBtr0111123	TRINITY_DN413_c0_g1_i5	FBtr0111123	FBgn0002566	gypsy8	Last exon	25.0961	0.97453
Gut	MUN-016	FBtr0111291	TRINITY_DN433_c0_g1_i1	FBtr0111291	FBgn0040005	Quasimodo	Last exon	27.5922	0.977328
Gut	MUN-016	FBtr0111292	TRINITY_DN433_c0_g1_i5	FBtr0111292	FBgn0040005	Quasimodo	Last exon	28.0201	0.706934
Gut	MUN-016	FBtr0111298	TRINITY_DN6363_c0_g1_i3	FBtr0111298	FBgn0262115	INE-1	Last exon	25.9864	0.997027
Gut	MUN-016	FBtr0111298	TRINITY_DN6363_c0_g1_i3	FBtr0111298	FBgn0262115	gypsy2	Last exon	25.9864	0.997027
Gut	MUN-016	FBtr0111299	TRINITY_DN6363_c0_g1_i5	MSTRG.2577.1	FBgn0262115	INE-1	Last exon	8.17893	0.612256
Gut	MUN-016	FBtr0111299	TRINITY_DN6363_c0_g1_i5	MSTRG.2577.1	FBgn0262115	gypsy2	Last exon	8.17893	0.612256
Gut	MUN-016	FBtr0111300	TRINITY_DN6363_c0_g1_i1	FBtr0111300	FBgn0262115	INE-1	Last exon	7.09585	0.987428
Gut	MUN-016	FBtr0111300	TRINITY_DN6363_c0_g1_i1	FBtr0111300	FBgn0262115	gypsy2	Last exon	7.09585	0.987428
Gut	MUN-016	FBtr0112820	TRINITY_DN1096_c2_g2_i1	FBtr0112820	FBgn0003175	roo	Middle exon	22.0653	1
Gut	MUN-016	FBtr0112824	TRINITY_DN4869_c0_g1_i22	FBtr0112824	FBgn0003345	roo	Last exon	3.20776	0.893366
Gut	MUN-016	FBtr0112868	TRINITY_DN4221_c0_g2_i3	MSTRG.12600.3	FBgn0011742	INE-1	Last exon	9.60732	0.998908
Gut	MUN-016	FBtr0113067	TRINITY_DN1525_c0_g1_i69	FBtr0113067	FBgn0033639	roo	First exon	2.58639	0.996886
Gut	MUN-016	FBtr0113150	TRINITY_DN3862_c2_g2_i1	FBtr0113150	FBgn0035719	roo	First exon	5.02017	0.213682
Gut	MUN-016	FBtr0113257	TRINITY_DN103_c0_g1_i2	MSTRG.9787.1	FBgn0038842	INE-1	Middle exon	40.454	0.99485
Gut	MUN-016	FBtr0113294	TRINITY_DN256_c0_g3_i2	FBtr0113294	FBgn0039411	roo	First exon	4.35933	1
Gut	MUN-016	FBtr0113378	TRINITY_DN3676_c0_g1_i5	MSTRG.4124.8	FBgn0050460	roo	Last exon	34.5052	1
Gut	MUN-016	FBtr0113430	TRINITY_DN2565_c0_g1_i17	FBtr0113430	FBgn0052264	roo	Middle exon	7.79687	1
Gut	MUN-016	FBtr0113680	TRINITY_DN383_c0_g1_i6	FBtr0113680	FBgn0020660	Invader2	Last exon	21.3337	0.998362
Gut	MUN-016	FBtr0113748	TRINITY_DN4296_c0_g1_i5	MSTRG.7894.1	FBgn0287182	Cr1a	Last exon	54.755	1
Gut	MUN-016	FBtr0113784	TRINITY_DN5733_c2_g1_i1	MSTRG.2574.1	FBgn0046706	INE-1	Last exon	1.01604	0.725729
Gut	MUN-016	FBtr0113784	TRINITY_DN5733_c2_g1_i1	MSTRG.2574.1	FBgn0046706	INE-1	First exon	1.01604	0.725729
Gut	MUN-016	FBtr0113784	TRINITY_DN5733_c2_g1_i4	FBtr0113784	FBgn0046706	INE-1	Last exon	39.5583	0.997479
Gut	MUN-016	FBtr0113784	TRINITY_DN5733_c2_g1_i4	FBtr0113784	FBgn0046706	INE-1	First exon	39.5583	0.997479
Gut	MUN-016	FBtr0113895	TRINITY_DN95_c2_g1_i1	FBtr0113895	FBgn0263977	INE-1	Last exon	72.234	0.585872
Gut	MUN-016	FBtr0113989	TRINITY_DN1418_c0_g1_i12	FBtr0113989	FBgn0039955	INE-1	Last exon	30.0228	1
Gut	MUN-016	FBtr0113990	TRINITY_DN1418_c0_g1_i16	FBtr0113990	FBgn0039955	INE-1	Last exon	1.93816	1
Gut	MUN-016	FBtr0273261	TRINITY_DN4368_c0_g1_i4	FBtr0273261	FBgn0035290	roo	Middle exon	19.2373	0.999993
Gut	MUN-016	FBtr0290112	TRINITY_DN3101_c0_g1_i1	FBtr0290112	FBgn0033313	roo	Middle exon	19.2216	1
Gut	MUN-016	FBtr0299789	TRINITY_DN1914_c0_g1_i2	FBtr0299789	FBgn0259227	roo	Middle exon	44.5328	1
Gut	MUN-016	FBtr0299879	TRINITY_DN284_c0_g1_i28	FBtr0299879	FBgn0032981	Blastopia	Last exon	10.0022	0.970575
Gut	MUN-016	FBtr0299879	TRINITY_DN284_c0_g1_i28	FBtr0299879	FBgn0032981	Copia-3_Dbp	Last exon	10.0022	0.970575
Gut	MUN-016	FBtr0299903	TRINITY_DN4434_c0_g1_i2	FBtr0299903	FBgn0039966	INE-1	Last exon	4.38504	0.958307
Gut	MUN-016	FBtr0300000	TRINITY_DN2447_c0_g1_i6	FBtr0300000	FBgn0259734	roo	Last exon	13.5642	1
Gut	MUN-016	FBtr0300118	TRINITY_DN4407_c0_g1_i18	FBtr0300118	FBgn0266347	Gypsy-1_Dsim	Last exon	4.6485	0.982073
Gut	MUN-016	FBtr0300118	TRINITY_DN4407_c0_g1_i18	FBtr0300118	FBgn0266347	INE-1	Last exon	4.6485	0.982073
Gut	MUN-016	FBtr0300248	TRINITY_DN5765_c0_g1_i1	FBtr0300248	FBgn0259935	roo	Middle exon	12.9997	0.999997
Gut	MUN-016	FBtr0300815	TRINITY_DN6382_c0_g1_i15	FBtr0300815	FBgn0031489	roo	Last exon	9.3364	0.969315
Gut	MUN-016	FBtr0301040	TRINITY_DN1223_c2_g1_i5	MSTRG.1113.6	FBgn0052982	roo	Middle exon	6.48171	0.999999
Gut	MUN-016	FBtr0301040	TRINITY_DN1223_c2_g1_i6	MSTRG.1113.8	FBgn0052982	roo	Middle exon	52.1407	0.999998
Gut	MUN-016	FBtr0301151	TRINITY_DN3359_c1_g1_i1	FBtr0301151	FBgn0020880	roo	Unique	11.0481	0.999999
Gut	MUN-016	FBtr0301313	TRINITY_DN505_c1_g1_i15	FBtr0301313	FBgn0265991	roo	Middle exon	13.4988	1
Gut	MUN-016	FBtr0301783	TRINITY_DN4519_c0_g1_i7	FBtr0301783	FBgn0260008	FB4	Last exon	24.4863	0.0472843
Gut	MUN-016	FBtr0301783	TRINITY_DN4519_c0_g1_i7	FBtr0301783	FBgn0260008	Tc1-2	Last exon	24.4863	0.0472843
Gut	MUN-016	FBtr0301784	TRINITY_DN4519_c0_g1_i1	FBtr0301784	FBgn0260008	FB4	Last exon	6.16077	0.0486403
Gut	MUN-016	FBtr0301784	TRINITY_DN4519_c0_g1_i1	FBtr0301784	FBgn0260008	Tc1-2	Last exon	6.16077	0.0486403
Gut	MUN-016	FBtr0301785	TRINITY_DN4519_c0_g1_i5	FBtr0301785	FBgn0260008	FB4	Last exon	3.06874	0.0429268
Gut	MUN-016	FBtr0301785	TRINITY_DN4519_c0_g1_i5	FBtr0301785	FBgn0260008	Tc1-2	Last exon	3.06874	0.0429268
Gut	MUN-016	FBtr0301792	TRINITY_DN4899_c0_g1_i1	FBtr0301792	FBgn0085638	1360	First exon	3.61027	0.437335
Gut	MUN-016	FBtr0301810	TRINITY_DN536_c1_g1_i23	FBtr0301810	FBgn0086378	1360	Last exon	42.7675	0.128426
Gut	MUN-016	FBtr0302227	TRINITY_DN1241_c0_g2_i2	MSTRG.2571.1	FBgn0262124	INE-1	First exon	44.9981	0.999999
Gut	MUN-016	FBtr0302410	TRINITY_DN2126_c0_g1_i11	FBtr0302410	FBgn0039993	1360	Last exon	49.5475	0.0512692
Gut	MUN-016	FBtr0302650	TRINITY_DN2686_c0_g1_i3	FBtr0302650	FBgn0261547	roo	Middle exon	10.5486	1
Gut	MUN-016	FBtr0302651	TRINITY_DN2686_c0_g1_i6	FBtr0302651	FBgn0261547	roo	Middle exon	11.5463	1
Gut	MUN-016	FBtr0302709	TRINITY_DN1140_c1_g1_i4	FBtr0302709	FBgn0261555	roo	Last exon	7.16785	0.999998
Gut	MUN-016	FBtr0302710	TRINITY_DN1140_c1_g1_i12	FBtr0302710	FBgn0261555	roo	Last exon	13.6749	1
Gut	MUN-016	FBtr0302905	TRINITY_DN2447_c0_g1_i11	FBtr0302905	FBgn0259734	roo	Last exon	30.0098	0.999999
Gut	MUN-016	FBtr0302910	TRINITY_DN1661_c0_g1_i4	FBtr0302910	FBgn0265298	roo	Last exon	16.687	0.821306
Gut	MUN-016	FBtr0302964	TRINITY_DN1087_c0_g1_i4	FBtr0302964	FBgn0030121	roo	Last exon	35.0951	0.999996
Gut	MUN-016	FBtr0303015	TRINITY_DN973_c0_g3_i4	FBtr0303015	FBgn0261641	INE-1	Last exon	4.14138	0.999994
Gut	MUN-016	FBtr0303015	TRINITY_DN973_c0_g3_i4	FBtr0303015	FBgn0261641	R1A1-element	Last exon	4.14138	0.999994
Gut	MUN-016	FBtr0303271	TRINITY_DN9939_c0_g1_i10	FBtr0303271	FBgn0261802	INE-1	Last exon	18.8827	1
Gut	MUN-016	FBtr0303272	TRINITY_DN9939_c0_g1_i12	FBtr0303272	FBgn0261802	INE-1	Last exon	17.521	1
Gut	MUN-016	FBtr0303293	TRINITY_DN4508_c0_g1_i4	MSTRG.2609.3	FBgn0053554	hopper	Middle exon	5.35553	1
Gut	MUN-016	FBtr0303434	TRINITY_DN335_c4_g1_i3	MSTRG.3854.2	FBgn0261854	roo	Middle exon	32.6753	0.99998
Gut	MUN-016	FBtr0303861	TRINITY_DN505_c2_g1_i17	FBtr0303861	FBgn0262028	G5	Last exon	9.96436	0.784449
Gut	MUN-016	FBtr0303882	TRINITY_DN3161_c0_g1_i1	MSTRG.1216.3	FBgn0051755	Bari1	Last exon	10.9616	0.853025
Gut	MUN-016	FBtr0303994	TRINITY_DN252_c1_g1_i27	FBtr0303994	FBgn0260462	INE-1	First exon	4.1662	0.9069
Gut	MUN-016	FBtr0304019	TRINITY_DN7348_c0_g1_i1	FBtr0304019	FBgn0262100	INE-1	First exon	2.73876	0.929957
Gut	MUN-016	FBtr0304582	TRINITY_DN3726_c0_g1_i1	FBtr0304582	FBgn0010015	roo	Last exon	9.602	0.999996
Gut	MUN-016	FBtr0304697	TRINITY_DN2891_c0_g1_i5	MSTRG.3701.2	FBgn0000662	roo	First exon	24.3057	0.999466
Gut	MUN-016	FBtr0304748	TRINITY_DN564_c1_g1_i15	FBtr0304748	FBgn0034086	17-6	Last exon	33.4349	0.917993
Gut	MUN-016	FBtr0304913	TRINITY_DN4923_c0_g1_i12	FBtr0304913	FBgn0263490	roo	Middle exon	4.0423	1
Gut	MUN-016	FBtr0304915	TRINITY_DN4923_c0_g1_i11	FBtr0304915	FBgn0263490	roo	Middle exon	1.4566	1
Gut	MUN-016	FBtr0304975	TRINITY_DN100_c8_g3_i2	FBtr0304975	FBgn0036534	roo	Last exon	64.4986	0.999989
Gut	MUN-016	FBtr0305081	TRINITY_DN3101_c0_g1_i9	FBtr0305081	FBgn0033313	roo	Middle exon	3.27314	1
Gut	MUN-016	FBtr0305082	TRINITY_DN3101_c0_g1_i4	FBtr0305082	FBgn0033313	roo	Middle exon	8.48781	1
Gut	MUN-016	FBtr0305317	TRINITY_DN880_c0_g1_i26	MSTRG.3080.1	FBgn0050345	INE-1	Middle exon	4.6698	0.882915
Gut	MUN-016	FBtr0305620	TRINITY_DN249_c3_g1_i2	FBtr0305620	FBgn0045852	roo	Last exon	8.06692	1
Gut	MUN-016	FBtr0306031	TRINITY_DN2100_c0_g1_i1	FBtr0306031	FBgn0032908	INE-1	Last exon	50.4317	1
Gut	MUN-016	FBtr0306235	TRINITY_DN999_c0_g1_i1	MSTRG.2486.2	FBgn0039972	297	First exon	45.0803	1
Gut	MUN-016	FBtr0306252	TRINITY_DN1661_c0_g1_i3	FBtr0306252	FBgn0265298	roo	Last exon	45.1644	0.717603
Gut	MUN-016	FBtr0306295	TRINITY_DN903_c0_g3_i6	FBtr0306295	FBgn0262886	INE-1	Last exon	29.9825	0.0338607
Gut	MUN-016	FBtr0306296	TRINITY_DN903_c0_g3_i1	FBtr0306296	FBgn0262886	INE-1	Last exon	6.44303	0.0442565
Gut	MUN-016	FBtr0306297	TRINITY_DN903_c0_g3_i2	FBtr0306297	FBgn0262886	INE-1	Last exon	7.53194	0.0342146
Gut	MUN-016	FBtr0306315	TRINITY_DN7636_c2_g1_i14	FBtr0306315	FBgn0262901	INE-1	First exon	1.22692	0.00430914
Gut	MUN-016	FBtr0306591	TRINITY_DN509_c0_g1_i8	FBtr0306591	FBgn0002121	INE-1	Last exon	26.3504	1
Gut	MUN-016	FBtr0306592	TRINITY_DN509_c0_g1_i17	MSTRG.2.1	FBgn0002121	INE-1	Last exon	1.13597	1
Gut	MUN-016	FBtr0306592	TRINITY_DN509_c0_g1_i21	MSTRG.2.2	FBgn0002121	INE-1	Last exon	7.18414	1
Gut	MUN-016	FBtr0306742	TRINITY_DN3561_c1_g1_i2	FBtr0306742	FBgn0024321	roo	First exon	3.28712	0.999976
Gut	MUN-016	FBtr0307068	TRINITY_DN413_c2_g1_i3	FBtr0079175	FBgn0001942	blood	Last exon	24.0735	0.999801
Gut	MUN-016	FBtr0307172	TRINITY_DN3122_c0_g1_i1	FBtr0307172	FBgn0039970	INE-1	Last exon	33.9839	0.289345
Gut	MUN-016	FBtr0307306	TRINITY_DN202_c1_g1_i1	MSTRG.5641.1	FBgn0263108	roo	First exon	1.91461	0.819935
Gut	MUN-016	FBtr0307521	TRINITY_DN630_c0_g2_i1	FBtr0307521	FBgn0036576	roo	Middle exon	39.9347	0.960039
Gut	MUN-016	FBtr0308133	TRINITY_DN4869_c0_g1_i11	FBtr0308133	FBgn0003345	roo	Last exon	2.44039	0.894645
Gut	MUN-016	FBtr0308354	TRINITY_DN9274_c0_g2_i5	FBtr0308354	FBgn0266568	INE-1	Middle exon	4.14093	0.0167345
Gut	MUN-016	FBtr0308359	TRINITY_DN9274_c0_g2_i2	FBtr0308359	FBgn0266568	INE-1	Middle exon	0.69301	0.0109286
Gut	MUN-016	FBtr0308946	TRINITY_DN6610_c0_g1_i1	FBtr0308946	FBgn0053294	INE-1	First exon	1.97117	0.410955
Gut	MUN-016	FBtr0309039	TRINITY_DN4356_c1_g1_i1	FBtr0305496	FBgn0262631	INE-1	Unique	19.5555	0.00550538
Gut	MUN-016	FBtr0309217	TRINITY_DN202_c5_g1_i1	FBtr0309217	FBgn0031060	INE-1	Last exon	38.5639	0.999687
Gut	MUN-016	FBtr0309245	TRINITY_DN6485_c0_g1_i46	FBtr0309245	FBgn0052626	LARD	First exon	10.1094	0.997505
Gut	MUN-016	FBtr0309527	TRINITY_DN878_c0_g1_i2	FBtr0309527	FBgn0263507	1360	Unique	40.4405	0.0298393
Gut	MUN-016	FBtr0309528	TRINITY_DN878_c0_g1_i1	FBtr0309528	FBgn0263507	1360	Last exon	12.4376	0.0414068
Gut	MUN-016	FBtr0310443	TRINITY_DN396_c2_g1_i2	FBtr0310443	FBgn0026878	roo	Last exon	27.6083	0.654627
Gut	MUN-016	FBtr0310448	TRINITY_DN3101_c0_g1_i11	MSTRG.2996.4	FBgn0033313	roo	Middle exon	6.71481	1
Gut	MUN-016	FBtr0310448	TRINITY_DN3101_c0_g1_i8	MSTRG.2996.3	FBgn0033313	roo	Middle exon	21.3441	1
Gut	MUN-016	FBtr0321267	TRINITY_DN3402_c0_g1_i1	FBtr0321267	FBgn0042125	roo	Last exon	62.5049	0.994117
Gut	MUN-016	FBtr0329829	TRINITY_DN536_c1_g1_i20	FBtr0329829	FBgn0250830	1360	Last exon	10.2391	0.99999
Gut	MUN-016	FBtr0329963	TRINITY_DN5378_c0_g1_i5	FBtr0329963	FBgn0032796	roo	First exon	19.9296	1
Gut	MUN-016	FBtr0330044	TRINITY_DN749_c1_g1_i1	FBtr0330044	FBgn0261285	Bari1	Last exon	12.9289	0.470603
Gut	MUN-016	FBtr0330045	TRINITY_DN1456_c0_g1_i1	FBtr0330045	FBgn0038233	roo	Last exon	39.7096	0.99858
Gut	MUN-016	FBtr0330596	TRINITY_DN385_c0_g1_i9	FBtr0330596	FBgn0030812	Gypsy-2_Dsim	Last exon	50.063	1
Gut	MUN-016	FBtr0330714	TRINITY_DN6852_c0_g1_i1	FBtr0330714	FBgn0015000	INE-1	Last exon	7.36226	0.987756
Gut	MUN-016	FBtr0331155	TRINITY_DN5654_c0_g1_i4	FBtr0331155	FBgn0030992	roo	Last exon	2.87441	0.99954
Gut	MUN-016	FBtr0331291	TRINITY_DN4555_c0_g1_i1	FBtr0331291	FBgn0264268	jockey2	Unique	3.1346	0.0756082
Gut	MUN-016	FBtr0331378	TRINITY_DN1293_c0_g2_i2	FBtr0081507	FBgn0032910	INE-1	Last exon	10.6515	0.998819
Gut	MUN-016	FBtr0331519	TRINITY_DN1654_c3_g1_i20	FBtr0331519	FBgn0264305	Quasimodo	Last exon	7.36117	1
Gut	MUN-016	FBtr0331616	TRINITY_DN923_c0_g1_i20	FBtr0331616	FBgn0032850	INE-1	First exon	28.7805	0.98109
Gut	MUN-016	FBtr0331657	TRINITY_DN10779_c0_g1_i4	FBtr0331656	FBgn0032974	INE-1	Last exon	17.2381	0.999995
Gut	MUN-016	FBtr0331733	TRINITY_DN4357_c0_g1_i8	FBtr0331733	FBgn0004198	roo	Middle exon	5.29468	1
Gut	MUN-016	FBtr0331733	TRINITY_DN4357_c0_g1_i8	FBtr0331733	FBgn0004198	roo	Last exon	5.29468	1
Gut	MUN-016	FBtr0331744	TRINITY_DN7559_c0_g2_i3	FBtr0331744	FBgn0024251	roo	First exon	6.4237	0.999998
Gut	MUN-016	FBtr0331920	TRINITY_DN1602_c0_g1_i3	FBtr0331920	FBgn0261456	roo	Last exon	66.9349	0.999999
Gut	MUN-016	FBtr0331925	TRINITY_DN335_c7_g1_i2	FBtr0331925	FBgn0086358	roo	Middle exon	14.1744	1
Gut	MUN-016	FBtr0331967	TRINITY_DN1385_c0_g1_i34	MSTRG.2629.1	FBgn0027507	INE-1	Middle exon	2.19606	0.999856
Gut	MUN-016	FBtr0331967	TRINITY_DN1385_c0_g1_i39	FBtr0331967	FBgn0027507	INE-1	Middle exon	2.17656	0.997315
Gut	MUN-016	FBtr0332016	TRINITY_DN249_c3_g1_i1	FBtr0332016	FBgn0045852	roo	Last exon	15.2793	0.999985
Gut	MUN-016	FBtr0332233	TRINITY_DN468_c0_g1_i15	FBtr0332233	FBgn0262475	roo	First exon	9.49208	1
Gut	MUN-016	FBtr0332578	TRINITY_DN4581_c0_g1_i11	FBtr0332578	FBgn0086443	gypsy8	Last exon	53.8158	0.999973
Gut	MUN-016	FBtr0332656	TRINITY_DN1067_c0_g1_i3	FBtr0332656	FBgn0043458	1360	Last exon	45.9145	1
Gut	MUN-016	FBtr0332738	TRINITY_DN3865_c0_g2_i2	FBtr0332738	FBgn0035574	roo	Middle exon	8.40873	1
Gut	MUN-016	FBtr0333042	TRINITY_DN3484_c1_g1_i2	FBtr0333042	FBgn0003459	Stalker4	Last exon	21.2977	1
Gut	MUN-016	FBtr0333078	TRINITY_DN3862_c2_g2_i2	FBtr0333078	FBgn0035719	roo	Middle exon	2.98598	0.999778
Gut	MUN-016	FBtr0333189	TRINITY_DN6363_c1_g1_i1	FBtr0333189	FBgn0058198	INE-1	Last exon	35.2385	0.409341
Gut	MUN-016	FBtr0333218	TRINITY_DN636_c0_g1_i1	FBtr0072464	FBgn0020386	roo	Middle exon	44.1362	1
Gut	MUN-016	FBtr0333266	TRINITY_DN1995_c2_g1_i2	FBtr0333266	FBgn0052479	pogo	Last exon	49.9275	0.999993
Gut	MUN-016	FBtr0333266	TRINITY_DN1995_c2_g1_i2	FBtr0333266	FBgn0052479	roo	First exon	49.9275	0.999993
Gut	MUN-016	FBtr0333667	TRINITY_DN859_c0_g1_i4	MSTRG.8488.1	FBgn0003165	roo	Middle exon	3.91242	1
Gut	MUN-016	FBtr0333668	TRINITY_DN859_c0_g1_i8	FBtr0333668	FBgn0003165	roo	Middle exon	3.20374	1
Gut	MUN-016	FBtr0333774	TRINITY_DN10828_c0_g1_i2	FBtr0333774	FBgn0264678	roo	Unique	7.15465	0.540071
Gut	MUN-016	FBtr0333858	TRINITY_DN2146_c0_g1_i88	FBtr0333858	FBgn0016081	roo	Middle exon	1.61967	1
Gut	MUN-016	FBtr0333873	TRINITY_DN4519_c0_g1_i3	FBtr0333873	FBgn0260008	FB4	Last exon	8.25748	0.026122
Gut	MUN-016	FBtr0333873	TRINITY_DN4519_c0_g1_i3	FBtr0333873	FBgn0260008	Tc1-2	Last exon	8.25748	0.026122
Gut	MUN-016	FBtr0333907	TRINITY_DN1253_c3_g2_i1	FBtr0076519	FBgn0035951	rover	Last exon	9.61875	0.999572
Gut	MUN-016	FBtr0333914	TRINITY_DN6749_c0_g2_i17	MSTRG.7849.1	FBgn0040056	INE-1	Middle exon	2.82253	0.773202
Gut	MUN-016	FBtr0334747	TRINITY_DN312_c0_g1_i52	FBtr0334747	FBgn0004179	roo	Middle exon	14.3517	0.697593
Gut	MUN-016	FBtr0334934	TRINITY_DN4296_c0_g1_i7	FBtr0334934	FBgn0287182	jockey2	Last exon	13.6322	0.0294504
Gut	MUN-016	FBtr0334937	TRINITY_DN4899_c0_g1_i2	MSTRG.2557.5	FBgn0085638	Tc1-2	First exon	4.00718	0.509782
Gut	MUN-016	FBtr0334985	TRINITY_DN475_c1_g2_i1	FBtr0334985	FBgn0040007	INE-1	Last exon	40.8029	0.0223344
Gut	MUN-016	FBtr0334986	TRINITY_DN6217_c0_g1_i11	MSTRG.2579.1	FBgn0262116	Tc1-2	Last exon	4.90213	0.0433949
Gut	MUN-016	FBtr0335016	TRINITY_DN1898_c1_g1_i6	FBtr0335016	FBgn0038840	INE-1	Last exon	1.41604	1
Gut	MUN-016	FBtr0335138	TRINITY_DN1293_c0_g1_i13	FBtr0080883	FBgn0001185	INE-1	Last exon	56.8999	0.999854
Gut	MUN-016	FBtr0335266	TRINITY_DN7365_c0_g2_i5	FBtr0335266	FBgn0033047	INE-1	First exon	11.3688	0.997481
Gut	MUN-016	FBtr0335266	TRINITY_DN7365_c0_g2_i5	FBtr0335266	FBgn0033047	INE-1	Last exon	11.3688	0.997481
Gut	MUN-016	FBtr0335266	TRINITY_DN7365_c0_g2_i6	FBtr0085966	FBgn0033047	INE-1	First exon	8.05699	0.999376
Gut	MUN-016	FBtr0335266	TRINITY_DN7365_c0_g2_i6	FBtr0085966	FBgn0033047	INE-1	Last exon	8.05699	0.999376
Gut	MUN-016	FBtr0335285	TRINITY_DN1299_c0_g1_i4	FBtr0085972	FBgn0033050	INE-1	Middle exon	2.67953	0.999495
Gut	MUN-016	FBtr0335512	TRINITY_DN284_c0_g1_i4	FBtr0335512	FBgn0265003	Gypsy-1_Dsim	Last exon	31.2027	1
Gut	MUN-016	FBtr0336467	TRINITY_DN935_c0_g1_i10	MSTRG.9499.3	FBgn0042693	roo	Middle exon	7.24075	0.999991
Gut	MUN-016	FBtr0336467	TRINITY_DN935_c0_g1_i16	MSTRG.9499.1	FBgn0042693	roo	Middle exon	12.2109	0.999994
Gut	MUN-016	FBtr0336480	TRINITY_DN2576_c0_g4_i1	FBtr0336481	FBgn0037228	INE-1	Last exon	50.4236	0.999071
Gut	MUN-016	FBtr0336617	TRINITY_DN1343_c0_g1_i5	MSTRG.1539.1	FBgn0262160	roo	Middle exon	8.87039	1
Gut	MUN-016	FBtr0336925	TRINITY_DN413_c0_g3_i3	FBtr0336925	FBgn0033185	1360	Last exon	8.62081	0.999981
Gut	MUN-016	FBtr0339717	TRINITY_DN781_c3_g1_i9	FBtr0339717	FBgn0039688	roo	First exon	2.25894	1
Gut	MUN-016	FBtr0339894	TRINITY_DN4288_c3_g3_i3	FBtr0339894	FBgn0010215	INE-1	Middle exon	6.3884	0.998794
Gut	MUN-016	FBtr0340313	TRINITY_DN1560_c0_g1_i6	FBtr0340313	FBgn0004227	INE-1	Last exon	25.2541	0.970663
Gut	MUN-016	FBtr0340488	TRINITY_DN2809_c1_g2_i1	FBtr0340488	FBgn0265630	roo	Middle exon	12.7059	1
Gut	MUN-016	FBtr0342743	TRINITY_DN4311_c0_g1_i1	FBtr0342743	FBgn0260780	roo	Middle exon	62.2598	1
Gut	MUN-016	FBtr0342952	TRINITY_DN1699_c0_g2_i2	MSTRG.11477.4	FBgn0052772	roo	Middle exon	15.86	0.999935
Gut	MUN-016	FBtr0342990	TRINITY_DN3359_c0_g1_i22	FBtr0342990	FBgn0034720	roo	Middle exon	1.9142	1
Gut	MUN-016	FBtr0343030	TRINITY_DN3174_c0_g1_i1	FBtr0343030	FBgn0026415	INE-1	Last exon	48.8949	0.999935
Gut	MUN-016	FBtr0343305	TRINITY_DN3749_c1_g1_i15	FBtr0343305	FBgn0266044	Gypsy-1_Dsim	Unique	21.4377	0.0326742
Gut	MUN-016	FBtr0343314	TRINITY_DN1602_c0_g1_i1	FBtr0343314	FBgn0004101	roo	First exon	31.0412	0.999618
Gut	MUN-016	FBtr0343357	TRINITY_DN2447_c0_g1_i4	FBtr0343357	FBgn0259734	roo	Last exon	4.031	1
Gut	MUN-016	FBtr0343363	TRINITY_DN9546_c0_g1_i2	FBtr0343363	FBgn0027528	jockey2	Last exon	50.0303	1
Gut	MUN-016	FBtr0343410	TRINITY_DN138_c0_g1_i2	FBtr0100081	FBgn0054026	LARD	Middle exon	3.20964	0.126181
Gut	MUN-016	FBtr0343410	TRINITY_DN138_c0_g1_i2	FBtr0100081	FBgn0054026	LARD	Last exon	3.20964	0.126181
Gut	MUN-016	FBtr0343556	TRINITY_DN1038_c10_g1_i1	FBtr0343556	FBgn0266101	roo	Last exon	43.5023	0.999993
Gut	MUN-016	FBtr0343825	TRINITY_DN5100_c0_g1_i2	FBtr0343825	FBgn0032688	roo	Last exon	4.12222	1
Gut	MUN-016	FBtr0344027	TRINITY_DN13360_c0_g1_i1	FBtr0344027	FBgn0264548	INE-1	Unique	4.75369	0.00988378
Gut	MUN-016	FBtr0344082	TRINITY_DN413_c0_g1_i9	FBtr0111125	FBgn0002566	Gypsy-1_Dsim	Last exon	7.36991	0.999991
Gut	MUN-016	FBtr0344082	TRINITY_DN413_c0_g1_i9	FBtr0111125	FBgn0002566	Gypsy-26_Dya	Last exon	7.36991	0.999991
Gut	MUN-016	FBtr0344082	TRINITY_DN413_c0_g1_i9	FBtr0111125	FBgn0002566	INE-1	First exon	7.36991	0.999991
Gut	MUN-016	FBtr0344082	TRINITY_DN413_c0_g1_i9	FBtr0111125	FBgn0002566	INE-1	Last exon	7.36991	0.999991
Gut	MUN-016	FBtr0344082	TRINITY_DN413_c0_g1_i9	FBtr0111125	FBgn0002566	S-element	First exon	7.36991	0.999991
Gut	MUN-016	FBtr0344082	TRINITY_DN413_c0_g1_i9	FBtr0111125	FBgn0002566	gypsy8	Last exon	7.36991	0.999991
Gut	MUN-016	FBtr0344983	TRINITY_DN312_c0_g1_i5	FBtr0344983	FBgn0004179	roo	Middle exon	18.7528	0.867793
Gut	MUN-016	FBtr0345008	TRINITY_DN890_c0_g1_i24	FBtr0345008	FBgn0039994	INE-1	First exon	7.73357	0.998773
Gut	MUN-016	FBtr0345008	TRINITY_DN890_c0_g1_i24	FBtr0345008	FBgn0039994	Rt1c	First exon	7.73357	0.998773
Gut	MUN-016	FBtr0345009	TRINITY_DN2831_c0_g1_i3	MSTRG.2604.1	FBgn0033005	INE-1	First exon	6.12858	1
Gut	MUN-016	FBtr0345028	TRINITY_DN5101_c0_g1_i2	MSTRG.5619.2	FBgn0035388	roo	Middle exon	63.7995	0.999877
Gut	MUN-016	FBtr0345054	TRINITY_DN7972_c0_g3_i2	FBtr0345054	FBgn0266687	Cr1a	Last exon	8.54045	0.129385
Gut	MUN-016	FBtr0345126	TRINITY_DN8231_c1_g1_i1	FBtr0345126	FBgn0266690	297	First exon	2.44622	0.0292083
Gut	MUN-016	FBtr0345227	TRINITY_DN100_c1_g1_i5	FBtr0345227	FBgn0000659	roo	Unique	45.0562	0.99956
Gut	MUN-016	FBtr0345418	TRINITY_DN235_c2_g1_i3	FBtr0086921	FBgn0028953	roo	Last exon	3.14159	0.999177
Gut	MUN-016	FBtr0345517	TRINITY_DN426_c0_g1_i1	FBtr0086985	FBgn0034198	Copia	Unique	71.269	0.825332
Gut	MUN-016	FBtr0345598	TRINITY_DN409_c1_g1_i2	FBtr0345598	FBgn0004861	gypsy11	First exon	21.4303	1
Gut	MUN-016	FBtr0345598	TRINITY_DN409_c1_g1_i2	FBtr0345598	FBgn0004861	roo	Middle exon	21.4303	1
Gut	MUN-016	FBtr0345638	TRINITY_DN409_c5_g1_i2	FBtr0079429	FBgn0051908	roo	Last exon	76.1539	0.999266
Gut	MUN-016	FBtr0345644	TRINITY_DN2217_c0_g1_i1	FBtr0345644	FBgn0085415	roo	Middle exon	72.3153	0.999817
Gut	MUN-016	FBtr0345687	TRINITY_DN243_c0_g1_i57	MSTRG.2264.1	FBgn0032889	INE-1	Last exon	0.742854	0.741053
Gut	MUN-016	FBtr0345714	TRINITY_DN2570_c1_g1_i1	FBtr0345714	FBgn0019661	BS2	First exon	45.0844	0.00341186
Gut	MUN-016	FBtr0345714	TRINITY_DN2570_c1_g1_i1	FBtr0345714	FBgn0019661	LARD	First exon	45.0844	0.00341186
Gut	MUN-016	FBtr0345714	TRINITY_DN2570_c1_g1_i1	FBtr0345714	FBgn0019661	LARD	Last exon	45.0844	0.00341186
Gut	MUN-016	FBtr0345806	TRINITY_DN734_c0_g1_i1	FBtr0075098	FBgn0042134	roo	Last exon	71.6847	1
Gut	MUN-016	FBtr0346087	TRINITY_DN2072_c0_g1_i1	MSTRG.12433.2	FBgn0030600	HB	First exon	35.8497	1
Gut	MUN-016	FBtr0346554	TRINITY_DN21317_c0_g1_i1	FBtr0346554	FBgn0267299	diver2	Unique	2.84752	0.0238998
Gut	MUN-016	FBtr0346555	TRINITY_DN7732_c1_g2_i11	FBtr0346555	FBgn0267300	Rt1b	Last exon	1.84252	0.0161943
Gut	MUN-016	FBtr0346819	TRINITY_DN739_c2_g1_i4	FBtr0346819	FBgn0037098	roo	Middle exon	4.55171	1
Gut	MUN-016	FBtr0347015	TRINITY_DN8587_c0_g1_i5	FBtr0347015	FBgn0267585	Stalker	Unique	6.02541	0.0235633
Gut	MUN-016	FBtr0347016	TRINITY_DN8587_c0_g1_i2	FBtr0347016	FBgn0267585	Stalker	First exon	3.06427	0.0254336
Gut	MUN-016	FBtr0347195	TRINITY_DN1814_c0_g1_i22	MSTRG.3523.1	FBgn0267691	INE-1	Last exon	24.3154	0.999963
Gut	MUN-016	FBtr0347211	TRINITY_DN592_c1_g1_i8	MSTRG.8622.2	FBgn0053208	roo	First exon	7.62599	1
Gut	MUN-016	FBtr0347540	TRINITY_DN739_c2_g1_i1	FBtr0346817	FBgn0037098	roo	Middle exon	41.3314	1
Gut	MUN-016	FBtr0415458	TRINITY_DN1898_c0_g1_i1	MSTRG.2490.3	FBgn0278598	1360	Last exon	10.9978	0.916998
Gut	MUN-016	FBtr0452077	TRINITY_DN1502_c0_g1_i7	FBtr0452077	FBgn0039543	roo	Last exon	19.5812	0.999952
Gut	MUN-016	FBtr0452129	TRINITY_DN195_c0_g1_i1	FBtr0081513	FBgn0284230	INE-1	First exon	9.38303	0.201228
Gut	MUN-016	FBtr0475062	TRINITY_DN5656_c0_g1_i8	FBtr0475062	FBgn0286884	INE-1	Unique	1.96651	0.0713541
Gut	MUN-016	FBtr0475316	TRINITY_DN1293_c12_g1_i1	FBtr0475316	FBgn0260721	INE-1	Unique	18.9235	0.174666
Gut	SLA-001	FBtr0070042	TRINITY_DN5321_c1_g1_i5	FBtr0070042	FBgn0264492	1360	Last exon	15.1687	0.929398
Gut	SLA-001	FBtr0070043	TRINITY_DN5321_c1_g1_i6	FBtr0070043	FBgn0264492	1360	Last exon	8.07145	0.927515
Gut	SLA-001	FBtr0070044	TRINITY_DN5321_c1_g1_i2	FBtr0070044	FBgn0264492	1360	Last exon	6.17993	0.939085
Gut	SLA-001	FBtr0070151	TRINITY_DN460_c2_g1_i6	FBtr0070151	FBgn0025639	roo	Last exon	1.85518	1
Gut	SLA-001	FBtr0070396	TRINITY_DN1451_c0_g1_i2	FBtr0070396	FBgn0000810	roo	First exon	40.692	0.999505
Gut	SLA-001	FBtr0070432	TRINITY_DN3138_c0_g1_i5	FBtr0070432	FBgn0004861	gypsy11	Middle exon	3.06908	1
Gut	SLA-001	FBtr0070432	TRINITY_DN3138_c0_g1_i5	FBtr0070432	FBgn0004861	roo	Middle exon	3.06908	1
Gut	SLA-001	FBtr0070669	TRINITY_DN6506_c0_g1_i1	FBtr0070669	FBgn0026079	hopper2	Last exon	5.05168	0.999959
Gut	SLA-001	FBtr0070817	TRINITY_DN6467_c0_g1_i4	FBtr0070817	FBgn0029814	roo	Last exon	4.75398	1
Gut	SLA-001	FBtr0070974	TRINITY_DN886_c1_g1_i1	FBtr0070974	FBgn0029905	roo	Last exon	46.3169	0.999996
Gut	SLA-001	FBtr0071009	TRINITY_DN1921_c9_g1_i1	FBtr0343331	FBgn0029929	INE-1	Unique	82.9616	0.989523
Gut	SLA-001	FBtr0071158	TRINITY_DN1654_c0_g1_i1	FBtr0071158	FBgn0030012	LARD	Unique	29.6594	0.999835
Gut	SLA-001	FBtr0071342	TRINITY_DN1777_c0_g1_i1	FBtr0071342	FBgn0030096	INE-1	Last exon	72.5001	0.999947
Gut	SLA-001	FBtr0071379	TRINITY_DN1242_c0_g5_i1	FBtr0071379	FBgn0000233	roo	First exon	10.9502	0.999996
Gut	SLA-001	FBtr0071556	TRINITY_DN6200_c0_g1_i2	FBtr0071556	FBgn0008636	roo	Middle exon	2.94042	0.999612
Gut	SLA-001	FBtr0071792	TRINITY_DN373_c2_g2_i4	FBtr0071792	FBgn0243516	roo	Middle exon	38.9942	0.999983
Gut	SLA-001	FBtr0071811	TRINITY_DN485_c3_g1_i2	MSTRG.4805.3	FBgn0034717	LARD	Middle exon	32.3453	1
Gut	SLA-001	FBtr0071811	TRINITY_DN485_c3_g1_i2	MSTRG.4805.3	FBgn0034717	LARD	Last exon	32.3453	1
Gut	SLA-001	FBtr0072578	TRINITY_DN3038_c0_g1_i1	FBtr0072578	FBgn0000575	roo	First exon	75.3437	0.934529
Gut	SLA-001	FBtr0072711	TRINITY_DN665_c0_g1_i2	FBtr0072711	FBgn0043458	1360	Last exon	24.2821	1
Gut	SLA-001	FBtr0073306	TRINITY_DN807_c0_g1_i1	FBtr0073306	FBgn0035551	NewFam16	Middle exon	18.6683	0.999154
Gut	SLA-001	FBtr0073306	TRINITY_DN807_c0_g1_i1	FBtr0073306	FBgn0035551	NewFam16	Last exon	18.6683	0.999154
Gut	SLA-001	FBtr0073518	TRINITY_DN3812_c0_g2_i1	FBtr0073519	FBgn0030318	Tom1	Last exon	77.4545	0.999625
Gut	SLA-001	FBtr0073975	TRINITY_DN4222_c0_g1_i1	FBtr0073975	FBgn0030597	LARD	Unique	32.6586	0.999991
Gut	SLA-001	FBtr0074175	TRINITY_DN270_c1_g2_i1	FBtr0074175	FBgn0026076	roo	Middle exon	78.5373	0.98248
Gut	SLA-001	FBtr0074276	TRINITY_DN417_c1_g3_i3	MSTRG.12607.5	FBgn0026575	roo	First exon	13.0493	1
Gut	SLA-001	FBtr0074359	TRINITY_DN3373_c0_g1_i3	FBtr0074359	FBgn0027528	jockey2	Last exon	11.9379	1
Gut	SLA-001	FBtr0074568	TRINITY_DN560_c2_g2_i4	FBtr0074568	FBgn0052548	roo	Last exon	15.4238	0.999781
Gut	SLA-001	FBtr0074634	TRINITY_DN401_c0_g1_i4	FBtr0074634	FBgn0283473	roo	First exon	45.9217	0.999864
Gut	SLA-001	FBtr0075054	TRINITY_DN738_c3_g2_i2	FBtr0075054	FBgn0036811	roo	Last exon	61.9142	0.90344
Gut	SLA-001	FBtr0075159	TRINITY_DN5321_c0_g1_i1	FBtr0075159	FBgn0036764	hopper2	First exon	52.7047	0.999995
Gut	SLA-001	FBtr0075171	TRINITY_DN1890_c0_g1_i1	FBtr0075171	FBgn0052190	roo	Middle exon	76.0529	0.999993
Gut	SLA-001	FBtr0075714	TRINITY_DN266_c3_g1_i6	FBtr0075714	FBgn0027375	INE-1	Middle exon	1.14654	0.998179
Gut	SLA-001	FBtr0075953	TRINITY_DN7084_c0_g1_i2	FBtr0075953	FBgn0052105	roo	First exon	6.4	0.995703
Gut	SLA-001	FBtr0076369	TRINITY_DN4415_c1_g1_i1	FBtr0076369	FBgn0015618	roo	Middle exon	42.1801	0.999858
Gut	SLA-001	FBtr0076369	TRINITY_DN4415_c1_g1_i1	FBtr0076369	FBgn0015618	roo	Last exon	42.1801	0.999858
Gut	SLA-001	FBtr0076504	TRINITY_DN2037_c0_g3_i3	FBtr0076504	FBgn0035993	INE-1	Last exon	16.244	0.99867
Gut	SLA-001	FBtr0077267	TRINITY_DN11447_c0_g1_i2	MSTRG.13048.1	FBgn0031144	Tc3	Middle exon	18.2588	0.999728
Gut	SLA-001	FBtr0077267	TRINITY_DN11447_c0_g1_i6	MSTRG.13048.4	FBgn0031144	Tc3	Last exon	9.04395	0.999707
Gut	SLA-001	FBtr0078153	TRINITY_DN3056_c0_g1_i21	MSTRG.20.13	FBgn0025683	Quasimodo2	Middle exon	13.2342	0.999997
Gut	SLA-001	FBtr0078307	TRINITY_DN818_c1_g3_i2	FBtr0078307	FBgn0004865	roo	Middle exon	16.6721	0.97982
Gut	SLA-001	FBtr0078348	TRINITY_DN6723_c0_g1_i9	FBtr0330156	FBgn0005694	roo	Middle exon	18.0121	0.774055
Gut	SLA-001	FBtr0078349	TRINITY_DN6723_c0_g1_i13	FBtr0078349	FBgn0005694	roo	Middle exon	7.82855	0.688255
Gut	SLA-001	FBtr0078350	TRINITY_DN6723_c0_g1_i1	FBtr0078350	FBgn0005694	roo	Middle exon	2.22716	0.550676
Gut	SLA-001	FBtr0078380	TRINITY_DN3214_c0_g1_i2	FBtr0078380	FBgn0037099	roo	First exon	47.9555	0.99996
Gut	SLA-001	FBtr0078394	TRINITY_DN20808_c0_g1_i2	FBtr0078394	FBgn0037085	Cr1a	Last exon	3.85611	0.987959
Gut	SLA-001	FBtr0078396	TRINITY_DN15635_c0_g1_i1	FBtr0078396	FBgn0283479	Tc1	Last exon	11.3162	0.999955
Gut	SLA-001	FBtr0078454	TRINITY_DN2740_c0_g1_i2	FBtr0078454	FBgn0037126	INE-1	Unique	8.93525	0.500642
Gut	SLA-001	FBtr0078538	TRINITY_DN7531_c2_g1_i1	FBtr0078538	FBgn0037183	1360	Unique	21.7654	0.931342
Gut	SLA-001	FBtr0078548	TRINITY_DN2475_c0_g2_i1	FBtr0078548	FBgn0037197	INE-1	Unique	95.3565	0.844168
Gut	SLA-001	FBtr0078961	TRINITY_DN327_c1_g1_i10	FBtr0078961	FBgn0037213	INE-1	Last exon	9.48871	0.999929
Gut	SLA-001	FBtr0078961	TRINITY_DN327_c1_g1_i12	MSTRG.7940.3	FBgn0037213	INE-1	Last exon	29.0838	0.999922
Gut	SLA-001	FBtr0079139	TRINITY_DN136_c3_g3_i1	FBtr0079139	FBgn0031740	roo	Last exon	57.7738	0.99992
Gut	SLA-001	FBtr0079176	TRINITY_DN2370_c0_g1_i5	FBtr0079176	FBgn0001942	blood	Middle exon	47.6132	0.999825
Gut	SLA-001	FBtr0079177	TRINITY_DN2370_c0_g1_i3	FBtr0079177	FBgn0001942	blood	Last exon	12.1138	0.999222
Gut	SLA-001	FBtr0079356	TRINITY_DN5025_c0_g1_i2	FBtr0346716	FBgn0264922	mdg1	First exon	67.4637	0.876545
Gut	SLA-001	FBtr0080072	TRINITY_DN2991_c0_g1_i10	FBtr0080072	FBgn0032210	INE-1	First exon	37.2513	0.999485
Gut	SLA-001	FBtr0080113	TRINITY_DN4532_c0_g1_i1	FBtr0080113	FBgn0032295	roo	Last exon	34.9009	1
Gut	SLA-001	FBtr0080200	TRINITY_DN3759_c1_g1_i1	FBtr0080200	FBgn0032348	roo	Last exon	25.7627	1
Gut	SLA-001	FBtr0081070	TRINITY_DN4217_c0_g1_i1	FBtr0081070	FBgn0032688	roo	Last exon	29.742	1
Gut	SLA-001	FBtr0081283	TRINITY_DN5353_c0_g1_i5	FBtr0081283	FBgn0032796	roo	First exon	1.64872	1
Gut	SLA-001	FBtr0081517	TRINITY_DN841_c5_g1_i1	FBtr0081517	FBgn0032945	INE-1	Last exon	73.1091	1
Gut	SLA-001	FBtr0081638	TRINITY_DN1512_c1_g1_i4	FBtr0081638	FBgn0037469	G4	First exon	70.5653	0.989923
Gut	SLA-001	FBtr0082116	TRINITY_DN1031_c10_g1_i1	FBtr0082116	FBgn0037705	roo	First exon	42.2787	0.999857
Gut	SLA-001	FBtr0082396	TRINITY_DN3201_c0_g1_i3	FBtr0082396	FBgn0037906	roo	First exon	28.1973	0.981235
Gut	SLA-001	FBtr0083218	TRINITY_DN214_c0_g6_i1	FBtr0083218	FBgn0038391	roo	Middle exon	77.5607	0.999981
Gut	SLA-001	FBtr0083218	TRINITY_DN214_c0_g6_i1	FBtr0083218	FBgn0038391	roo	First exon	77.5607	0.999981
Gut	SLA-001	FBtr0083221	TRINITY_DN4832_c0_g1_i5	FBtr0083221	FBgn0003117	roo	Last exon	3.50176	0.999913
Gut	SLA-001	FBtr0083553	TRINITY_DN747_c0_g2_i4	FBtr0083553	FBgn0042693	roo	Middle exon	18.9698	0.999959
Gut	SLA-001	FBtr0083703	TRINITY_DN2926_c0_g1_i3	FBtr0083703	FBgn0261113	1360	First exon	1.43102	0.985977
Gut	SLA-001	FBtr0083917	TRINITY_DN323_c2_g1_i5	FBtr0083917	FBgn0001169	roo	First exon	2.07099	0.999999
Gut	SLA-001	FBtr0085355	TRINITY_DN3324_c0_g1_i1	FBtr0085355	FBgn0039601	roo	Last exon	78.2493	0.999994
Gut	SLA-001	FBtr0085441	TRINITY_DN4619_c0_g1_i1	FBtr0085441	FBgn0000492	roo	First exon	13.3162	0.999969
Gut	SLA-001	FBtr0085718	TRINITY_DN692_c2_g1_i2	FBtr0085718	FBgn0039807	roo	Unique	59.8595	0.998211
Gut	SLA-001	FBtr0085877	TRINITY_DN3597_c0_g1_i1	FBtr0085877	FBgn0040206	INE-1	Last exon	13.8504	0.982469
Gut	SLA-001	FBtr0086054	TRINITY_DN1921_c1_g1_i8	FBtr0086054	FBgn0025693	INE-1	Last exon	26.6809	0.998543
Gut	SLA-001	FBtr0086079	TRINITY_DN8360_c1_g1_i1	MSTRG.2608.2	FBgn0033010	INE-1	Last exon	14.6118	0.980271
Gut	SLA-001	FBtr0086080	TRINITY_DN8360_c1_g1_i9	FBtr0086080	FBgn0033010	BS3	First exon	4.73592	0.999873
Gut	SLA-001	FBtr0086080	TRINITY_DN8360_c1_g1_i9	FBtr0086080	FBgn0033010	INE-1	First exon	4.73592	0.999873
Gut	SLA-001	FBtr0086080	TRINITY_DN8360_c1_g1_i9	FBtr0086080	FBgn0033010	INE-1	Last exon	4.73592	0.999873
Gut	SLA-001	FBtr0086081	TRINITY_DN8360_c1_g1_i8	FBtr0086081	FBgn0033010	INE-1	Last exon	47.8455	0.999989
Gut	SLA-001	FBtr0086092	TRINITY_DN1710_c0_g1_i1	FBtr0086092	FBgn0033021	INE-1	Last exon	12.9717	0.999982
Gut	SLA-001	FBtr0086516	TRINITY_DN29_c1_g1_i1	FBtr0086516	FBgn0086358	roo	Middle exon	46.8904	1
Gut	SLA-001	FBtr0086763	TRINITY_DN5925_c1_g2_i1	FBtr0086763	FBgn0040737	roo	Unique	8.86283	0.503082
Gut	SLA-001	FBtr0087242	TRINITY_DN464_c1_g1_i3	FBtr0087242	FBgn0034087	INE-1	Last exon	14.4334	1
Gut	SLA-001	FBtr0087526	TRINITY_DN313_c0_g2_i8	FBtr0087526	FBgn0000289	roo	Middle exon	5.93811	0.999936
Gut	SLA-001	FBtr0087526	TRINITY_DN313_c0_g2_i8	FBtr0087526	FBgn0000289	roo	Last exon	5.93811	0.999936
Gut	SLA-001	FBtr0087647	TRINITY_DN692_c0_g1_i3	FBtr0087647	FBgn0000662	roo	First exon	40.687	0.999973
Gut	SLA-001	FBtr0088053	TRINITY_DN622_c1_g2_i3	FBtr0088053	FBgn0033669	roo	Last exon	3.36409	0.881184
Gut	SLA-001	FBtr0088487	TRINITY_DN2424_c1_g1_i4	FBtr0088487	FBgn0033448	roo	First exon	29.8314	0.999965
Gut	SLA-001	FBtr0089052	TRINITY_DN886_c2_g1_i1	FBtr0089052	FBgn0002930	roo	Middle exon	81.0664	0.999979
Gut	SLA-001	FBtr0089508	TRINITY_DN761_c1_g1_i2	FBtr0089508	FBgn0017418	1360	Last exon	0.880024	0.999742
Gut	SLA-001	FBtr0100362	TRINITY_DN266_c3_g1_i3	FBtr0100362	FBgn0027375	INE-1	Middle exon	3.62467	0.998351
Gut	SLA-001	FBtr0100407	TRINITY_DN5473_c0_g3_i5	FBtr0100407	FBgn0032979	INE-1	Last exon	10.2197	0.996399
Gut	SLA-001	FBtr0100599	TRINITY_DN924_c0_g1_i4	FBtr0100599	FBgn0024251	roo	Middle exon	43.8199	0.999999
Gut	SLA-001	FBtr0111111	TRINITY_DN6550_c0_g1_i4	FBtr0308810	FBgn0046692	Gypsy-1_Dsim	Last exon	58.4106	0.83599
Gut	SLA-001	FBtr0111111	TRINITY_DN6550_c0_g1_i4	FBtr0308810	FBgn0046692	Gypsy-6_Dse	Last exon	58.4106	0.83599
Gut	SLA-001	FBtr0111111	TRINITY_DN6550_c0_g1_i8	MSTRG.2585.1	FBgn0046692	Gypsy-1_Dsim	Last exon	7.28312	0.111909
Gut	SLA-001	FBtr0111111	TRINITY_DN6550_c0_g1_i8	MSTRG.2585.1	FBgn0046692	Gypsy-6_Dse	Last exon	7.28312	0.111909
Gut	SLA-001	FBtr0111144	TRINITY_DN761_c0_g1_i54	FBtr0111144	FBgn0287187	1360	Middle exon	2.20999	0.00435793
Gut	SLA-001	FBtr0111144	TRINITY_DN761_c0_g1_i54	FBtr0111144	FBgn0287187	1360	Last exon	2.20999	0.00435793
Gut	SLA-001	FBtr0111144	TRINITY_DN761_c0_g1_i54	FBtr0111144	FBgn0287187	INE-1	First exon	2.20999	0.00435793
Gut	SLA-001	FBtr0111144	TRINITY_DN761_c0_g1_i54	FBtr0111144	FBgn0287187	INE-1	Middle exon	2.20999	0.00435793
Gut	SLA-001	FBtr0111144	TRINITY_DN761_c0_g1_i54	FBtr0111144	FBgn0287187	looper1	Middle exon	2.20999	0.00435793
Gut	SLA-001	FBtr0111252	TRINITY_DN6503_c0_g1_i1	MSTRG.2492.5	FBgn0040011	1360	Last exon	55.6868	1
Gut	SLA-001	FBtr0111300	TRINITY_DN6150_c0_g1_i1	FBtr0111300	FBgn0262115	INE-1	Last exon	8.8183	0.987174
Gut	SLA-001	FBtr0111300	TRINITY_DN6150_c0_g1_i1	FBtr0111300	FBgn0262115	gypsy2	Last exon	8.8183	0.987174
Gut	SLA-001	FBtr0112620	TRINITY_DN5817_c0_g1_i1	FBtr0112620	FBgn0085411	roo	Last exon	2.99793	1
Gut	SLA-001	FBtr0112642	TRINITY_DN3889_c0_g1_i4	FBtr0112642	FBgn0085424	roo	Middle exon	12.1263	1
Gut	SLA-001	FBtr0112843	TRINITY_DN3138_c0_g1_i4	MSTRG.11241.1	FBgn0004860	roo	First exon	20.9266	1
Gut	SLA-001	FBtr0112843	TRINITY_DN3138_c0_g1_i4	MSTRG.11241.1	FBgn0004860	roo	Middle exon	20.9266	1
Gut	SLA-001	FBtr0112868	TRINITY_DN6682_c0_g1_i2	MSTRG.12600.3	FBgn0011742	INE-1	Last exon	8.72062	0.9979
Gut	SLA-001	FBtr0113190	TRINITY_DN621_c0_g1_i3	FBtr0113190	FBgn0037223	INE-1	Last exon	17.6809	0.107908
Gut	SLA-001	FBtr0113197	TRINITY_DN459_c0_g2_i14	FBtr0113197	FBgn0037386	INE-1	Last exon	2.65239	0.996913
Gut	SLA-001	FBtr0113257	TRINITY_DN736_c0_g1_i12	MSTRG.9787.1	FBgn0038842	INE-1	Middle exon	22.535	0.450074
Gut	SLA-001	FBtr0113776	TRINITY_DN5968_c0_g1_i8	FBtr0113776	FBgn0063368	gypsy8	Unique	5.49475	0.112297
Gut	SLA-001	FBtr0113784	TRINITY_DN4065_c1_g1_i1	FBtr0113784	FBgn0046706	INE-1	First exon	41.6938	0.99764
Gut	SLA-001	FBtr0113784	TRINITY_DN4065_c1_g1_i2	MSTRG.2574.1	FBgn0046706	INE-1	First exon	1.62663	0.738697
Gut	SLA-001	FBtr0113895	TRINITY_DN345_c17_g1_i1	FBtr0113895	FBgn0263977	INE-1	Last exon	79.4984	0.597612
Gut	SLA-001	FBtr0273348	TRINITY_DN5523_c0_g1_i2	FBtr0273348	FBgn0035921	roo	First exon	6.62369	0.997272
Gut	SLA-001	FBtr0299617	TRINITY_DN4741_c0_g1_i2	FBtr0299617	FBgn0259167	roo	First exon	10.2909	0.935024
Gut	SLA-001	FBtr0299743	TRINITY_DN4457_c0_g1_i2	FBtr0299743	FBgn0265998	roo	First exon	7.47699	0.999997
Gut	SLA-001	FBtr0300997	TRINITY_DN254_c0_g3_i1	FBtr0300997	FBgn0052772	roo	Middle exon	13.069	0.999922
Gut	SLA-001	FBtr0301435	TRINITY_DN1626_c0_g1_i23	FBtr0301435	FBgn0016081	roo	Middle exon	8.94889	1
Gut	SLA-001	FBtr0301515	TRINITY_DN3138_c0_g1_i6	FBtr0301515	FBgn0004861	gypsy11	Middle exon	7.51894	1
Gut	SLA-001	FBtr0301515	TRINITY_DN3138_c0_g1_i6	FBtr0301515	FBgn0004861	roo	Middle exon	7.51894	1
Gut	SLA-001	FBtr0301785	TRINITY_DN383_c0_g2_i3	FBtr0301785	FBgn0260008	Tc1-2	Last exon	6.28185	0.0786295
Gut	SLA-001	FBtr0301792	TRINITY_DN4311_c0_g1_i1	FBtr0301792	FBgn0085638	INE-1	Middle exon	2.85684	0.385953
Gut	SLA-001	FBtr0302023	TRINITY_DN4973_c0_g1_i9	FBtr0302023	FBgn0039054	roo	Middle exon	10.2399	0.999974
Gut	SLA-001	FBtr0302346	TRINITY_DN7537_c0_g1_i18	FBtr0302346	FBgn0058354	Gypsy-4_Dsim	Unique	2.63845	0.685905
Gut	SLA-001	FBtr0302346	TRINITY_DN7537_c0_g1_i18	FBtr0302346	FBgn0058354	Quasimodo	Unique	2.63845	0.685905
Gut	SLA-001	FBtr0302387	TRINITY_DN6503_c0_g1_i2	FBtr0302387	FBgn0040011	1360	Last exon	5.25083	1
Gut	SLA-001	FBtr0302651	TRINITY_DN2488_c0_g1_i5	FBtr0302651	FBgn0261547	roo	Middle exon	28.1696	1
Gut	SLA-001	FBtr0302910	TRINITY_DN1363_c0_g1_i4	FBtr0302910	FBgn0265298	roo	Last exon	17.4804	0.839723
Gut	SLA-001	FBtr0303272	TRINITY_DN131_c0_g1_i14	FBtr0303272	FBgn0261802	INE-1	Last exon	17.5154	1
Gut	SLA-001	FBtr0303273	TRINITY_DN131_c0_g1_i15	FBtr0303273	FBgn0261802	INE-1	Last exon	9.24368	1
Gut	SLA-001	FBtr0303434	TRINITY_DN823_c2_g1_i1	MSTRG.3854.2	FBgn0261854	roo	Middle exon	9.39489	0.999957
Gut	SLA-001	FBtr0303434	TRINITY_DN823_c2_g1_i2	MSTRG.3854.3	FBgn0261854	roo	Middle exon	5.43666	0.999961
Gut	SLA-001	FBtr0303434	TRINITY_DN823_c2_g1_i5	MSTRG.3854.4	FBgn0261854	roo	Middle exon	18.5756	0.999726
Gut	SLA-001	FBtr0303434	TRINITY_DN823_c2_g1_i7	MSTRG.3854.1	FBgn0261854	roo	Middle exon	12.4053	0.999949
Gut	SLA-001	FBtr0303454	TRINITY_DN799_c1_g1_i12	FBtr0303454	FBgn0004369	roo	Last exon	34.1247	1
Gut	SLA-001	FBtr0303751	TRINITY_DN4512_c0_g2_i9	FBtr0303751	FBgn0261934	roo	Middle exon	6.1067	0.97635
Gut	SLA-001	FBtr0303751	TRINITY_DN4512_c0_g2_i9	FBtr0303751	FBgn0261934	roo	Last exon	6.1067	0.97635
Gut	SLA-001	FBtr0304110	TRINITY_DN4737_c2_g1_i1	FBtr0304110	FBgn0052218	roo	Unique	9.375	0.782856
Gut	SLA-001	FBtr0304697	TRINITY_DN692_c0_g1_i1	MSTRG.3701.2	FBgn0000662	roo	First exon	13.0141	0.998797
Gut	SLA-001	FBtr0304697	TRINITY_DN692_c0_g1_i8	MSTRG.3701.1	FBgn0000662	roo	First exon	7.26003	0.988731
Gut	SLA-001	FBtr0304978	TRINITY_DN6241_c0_g1_i16	FBtr0304978	FBgn0262532	INE-1	Middle exon	1.02675	0.938392
Gut	SLA-001	FBtr0304978	TRINITY_DN6241_c0_g1_i16	FBtr0304978	FBgn0262532	hopper2	First exon	1.02675	0.938392
Gut	SLA-001	FBtr0304978	TRINITY_DN6241_c0_g1_i16	FBtr0304978	FBgn0262532	hopper2	Last exon	1.02675	0.938392
Gut	SLA-001	FBtr0305081	TRINITY_DN782_c0_g3_i4	FBtr0305081	FBgn0033313	roo	Middle exon	9.74617	1
Gut	SLA-001	FBtr0305082	TRINITY_DN782_c0_g3_i3	FBtr0305082	FBgn0033313	roo	Middle exon	24.9737	1
Gut	SLA-001	FBtr0305281	TRINITY_DN10711_c0_g1_i1	FBtr0305281	FBgn0262607	INE-1	Last exon	8.05511	0.298887
Gut	SLA-001	FBtr0305317	TRINITY_DN1361_c0_g1_i54	MSTRG.3080.1	FBgn0050345	INE-1	Middle exon	3.3621	0.996775
Gut	SLA-001	FBtr0305503	TRINITY_DN1110_c0_g1_i7	FBtr0305503	FBgn0032955	INE-1	First exon	6.32725	0.99948
Gut	SLA-001	FBtr0305620	TRINITY_DN270_c1_g7_i1	FBtr0305620	FBgn0045852	roo	Last exon	24.112	1
Gut	SLA-001	FBtr0306031	TRINITY_DN4558_c0_g1_i3	FBtr0306031	FBgn0032908	INE-1	Last exon	16.1548	1
Gut	SLA-001	FBtr0306111	TRINITY_DN1227_c0_g1_i2	FBtr0306111	FBgn0016078	INE-1	Last exon	2.39099	0.988536
Gut	SLA-001	FBtr0306240	TRINITY_DN1626_c0_g1_i13	MSTRG.6402.11	FBgn0016081	roo	Middle exon	4.77352	1
Gut	SLA-001	FBtr0306252	TRINITY_DN1363_c0_g1_i2	FBtr0306252	FBgn0265298	roo	Last exon	47.2397	0.743367
Gut	SLA-001	FBtr0306295	TRINITY_DN55_c0_g1_i6	FBtr0306295	FBgn0262886	INE-1	Last exon	12.8659	0.00908273
Gut	SLA-001	FBtr0306295	TRINITY_DN55_c0_g1_i6	FBtr0306295	FBgn0262886	S-element	Last exon	12.8659	0.00908273
Gut	SLA-001	FBtr0306296	TRINITY_DN55_c0_g1_i11	FBtr0306296	FBgn0262886	INE-1	Last exon	7.71313	0.0131101
Gut	SLA-001	FBtr0306296	TRINITY_DN55_c0_g1_i11	FBtr0306296	FBgn0262886	S-element	Last exon	7.71313	0.0131101
Gut	SLA-001	FBtr0306297	TRINITY_DN55_c0_g1_i8	FBtr0306297	FBgn0262886	INE-1	Last exon	10.5543	0.0323898
Gut	SLA-001	FBtr0306299	TRINITY_DN65_c0_g1_i6	MSTRG.2505.1	FBgn0262887	gypsy8	Middle exon	23.184	0.0354163
Gut	SLA-001	FBtr0306591	TRINITY_DN4899_c0_g1_i30	FBtr0306591	FBgn0002121	INE-1	Last exon	27.481	1
Gut	SLA-001	FBtr0306591	TRINITY_DN4899_c0_g1_i30	FBtr0306591	FBgn0002121	Idefix	Last exon	27.481	1
Gut	SLA-001	FBtr0306592	TRINITY_DN4899_c0_g1_i16	MSTRG.2.1	FBgn0002121	INE-1	Last exon	27.421	1
Gut	SLA-001	FBtr0306592	TRINITY_DN4899_c0_g1_i16	MSTRG.2.1	FBgn0002121	Idefix	Last exon	27.421	1
Gut	SLA-001	FBtr0306592	TRINITY_DN4899_c0_g1_i18	MSTRG.2.2	FBgn0002121	INE-1	Last exon	9.58128	1
Gut	SLA-001	FBtr0306592	TRINITY_DN4899_c0_g1_i18	MSTRG.2.2	FBgn0002121	Idefix	Last exon	9.58128	1
Gut	SLA-001	FBtr0307068	TRINITY_DN2370_c0_g1_i2	FBtr0079175	FBgn0001942	blood	Last exon	24.835	0.999795
Gut	SLA-001	FBtr0308354	TRINITY_DN4476_c0_g1_i2	FBtr0308354	FBgn0266568	INE-1	Middle exon	4.42011	0.0148819
Gut	SLA-001	FBtr0308892	TRINITY_DN6026_c0_g1_i11	MSTRG.2527.5	FBgn0069969	INE-1	Last exon	5.56901	0.860511
Gut	SLA-001	FBtr0309039	TRINITY_DN7167_c0_g1_i4	FBtr0305496	FBgn0262631	INE-1	Unique	9.79007	0.00666984
Gut	SLA-001	FBtr0309217	TRINITY_DN2681_c2_g1_i2	FBtr0309217	FBgn0031060	INE-1	Last exon	51.7555	0.999076
Gut	SLA-001	FBtr0310065	TRINITY_DN4515_c0_g1_i6	FBtr0310065	FBgn0260938	roo	Middle exon	3.41479	1
Gut	SLA-001	FBtr0310080	TRINITY_DN1043_c0_g2_i1	FBtr0310080	FBgn0260386	roo	Middle exon	55.4072	0.999975
Gut	SLA-001	FBtr0310081	TRINITY_DN1043_c0_g2_i2	FBtr0310081	FBgn0260386	roo	Middle exon	11.0801	0.999955
Gut	SLA-001	FBtr0310448	TRINITY_DN782_c0_g3_i5	MSTRG.2996.4	FBgn0033313	roo	Middle exon	26.7297	1
Gut	SLA-001	FBtr0321267	TRINITY_DN738_c1_g1_i2	FBtr0321267	FBgn0042125	roo	Last exon	84.8126	0.994156
Gut	SLA-001	FBtr0329829	TRINITY_DN761_c0_g1_i21	FBtr0329829	FBgn0250830	1360	Last exon	62.1041	0.999992
Gut	SLA-001	FBtr0329963	TRINITY_DN5353_c0_g1_i1	FBtr0329963	FBgn0032796	roo	First exon	7.27566	1
Gut	SLA-001	FBtr0330085	TRINITY_DN323_c6_g1_i2	FBtr0085220	FBgn0045862	roo	Last exon	64.4815	1
Gut	SLA-001	FBtr0330261	TRINITY_DN655_c0_g1_i5	FBtr0330261	FBgn0263993	roo	Last exon	9.90058	0.999986
Gut	SLA-001	FBtr0331230	TRINITY_DN4691_c3_g1_i3	FBtr0331230	FBgn0031257	roo	Last exon	6.52449	0.999995
Gut	SLA-001	FBtr0331231	TRINITY_DN4691_c3_g1_i1	FBtr0331231	FBgn0031257	roo	Last exon	1.49893	0.99987
Gut	SLA-001	FBtr0331378	TRINITY_DN65_c2_g1_i4	FBtr0081507	FBgn0032910	INE-1	Middle exon	2.8721	0.951403
Gut	SLA-001	FBtr0331643	TRINITY_DN5663_c0_g1_i1	FBtr0331643	FBgn0067622	INE-1	Last exon	74.66	0.520902
Gut	SLA-001	FBtr0331744	TRINITY_DN924_c0_g1_i3	FBtr0331744	FBgn0024251	roo	First exon	3.39973	0.999999
Gut	SLA-001	FBtr0331745	TRINITY_DN924_c0_g1_i2	FBtr0331745	FBgn0024251	roo	Middle exon	6.44641	1
Gut	SLA-001	FBtr0331821	TRINITY_DN15635_c0_g1_i2	FBtr0331821	FBgn0283479	Tc1	Last exon	1.23077	0.999961
Gut	SLA-001	FBtr0331920	TRINITY_DN397_c5_g1_i1	FBtr0331920	FBgn0261456	roo	Last exon	69.0221	0.999999
Gut	SLA-001	FBtr0331925	TRINITY_DN29_c1_g1_i9	FBtr0331925	FBgn0086358	roo	Middle exon	16.8254	1
Gut	SLA-001	FBtr0331967	TRINITY_DN1537_c0_g1_i3	FBtr0331967	FBgn0027507	INE-1	Middle exon	1.79962	0.997629
Gut	SLA-001	FBtr0332105	TRINITY_DN1869_c0_g1_i17	MSTRG.7811.7	FBgn0052451	INE-1	Last exon	1.0648	1
Gut	SLA-001	FBtr0332105	TRINITY_DN1869_c0_g1_i20	MSTRG.7811.2	FBgn0052451	INE-1	Last exon	2.70076	1
Gut	SLA-001	FBtr0332232	TRINITY_DN397_c1_g1_i10	FBtr0332232	FBgn0262475	roo	Middle exon	17.897	0.999996
Gut	SLA-001	FBtr0332233	TRINITY_DN397_c1_g1_i3	FBtr0332233	FBgn0262475	roo	Middle exon	11.1991	1
Gut	SLA-001	FBtr0332234	TRINITY_DN397_c1_g1_i15	FBtr0332234	FBgn0262475	roo	Middle exon	4.63903	0.999938
Gut	SLA-001	FBtr0332656	TRINITY_DN665_c0_g1_i3	FBtr0332656	FBgn0043458	1360	Last exon	43.158	1
Gut	SLA-001	FBtr0332686	TRINITY_DN5817_c0_g1_i3	FBtr0332686	FBgn0085411	roo	Last exon	5.4836	1
Gut	SLA-001	FBtr0332775	TRINITY_DN3491_c0_g1_i2	FBtr0332775	FBgn0036967	INE-1	First exon	2.5587	0.62131
Gut	SLA-001	FBtr0332851	TRINITY_DN761_c1_g1_i1	FBtr0332851	FBgn0017418	1360	Last exon	0.922105	0.999722
Gut	SLA-001	FBtr0332935	TRINITY_DN6467_c0_g1_i2	FBtr0332935	FBgn0029814	roo	Last exon	1.1338	0.999989
Gut	SLA-001	FBtr0332975	TRINITY_DN5968_c0_g1_i7	FBtr0332975	FBgn0063368	gypsy8	First exon	1.71566	0.281608
Gut	SLA-001	FBtr0333189	TRINITY_DN2462_c0_g2_i2	FBtr0333189	FBgn0058198	INE-1	Last exon	37.0638	0.396998
Gut	SLA-001	FBtr0333218	TRINITY_DN821_c0_g1_i6	FBtr0072464	FBgn0020386	roo	Middle exon	43.2407	1
Gut	SLA-001	FBtr0333244	TRINITY_DN5866_c0_g1_i2	FBtr0333244	FBgn0264548	INE-1	First exon	15.9285	0.0344571
Gut	SLA-001	FBtr0333266	TRINITY_DN597_c2_g1_i5	FBtr0333266	FBgn0052479	pogo	Last exon	6.05086	0.999989
Gut	SLA-001	FBtr0333266	TRINITY_DN597_c2_g1_i5	FBtr0333266	FBgn0052479	roo	First exon	6.05086	0.999989
Gut	SLA-001	FBtr0333331	TRINITY_DN4174_c0_g4_i2	FBtr0333331	FBgn0041210	roo	First exon	19.2017	1
Gut	SLA-001	FBtr0333745	TRINITY_DN131_c0_g1_i20	FBtr0333745	FBgn0261802	INE-1	Last exon	6.17916	1
Gut	SLA-001	FBtr0333763	TRINITY_DN9241_c2_g2_i3	FBtr0333763	FBgn0264674	LARD	Last exon	4.17693	0.298316
Gut	SLA-001	FBtr0333858	TRINITY_DN1626_c0_g1_i14	FBtr0333858	FBgn0016081	roo	Middle exon	2.86789	1
Gut	SLA-001	FBtr0334112	TRINITY_DN345_c18_g1_i1	FBtr0334112	FBgn0264727	INE-1	Unique	108.431	NA
Gut	SLA-001	FBtr0334546	TRINITY_DN791_c0_g1_i15	FBtr0334546	FBgn0010015	roo	Last exon	8.82923	0.999994
Gut	SLA-001	FBtr0334676	TRINITY_DN1845_c0_g2_i28	FBtr0334676	FBgn0261238	roo	Middle exon	4.83552	1
Gut	SLA-001	FBtr0334747	TRINITY_DN41_c0_g1_i3	FBtr0334747	FBgn0004179	roo	Middle exon	9.8708	0.702976
Gut	SLA-001	FBtr0334934	TRINITY_DN12863_c0_g1_i7	FBtr0334934	FBgn0287182	jockey2	Last exon	24.177	0.0174491
Gut	SLA-001	FBtr0335016	TRINITY_DN236_c4_g1_i8	FBtr0335016	FBgn0038840	INE-1	Last exon	8.3303	1
Gut	SLA-001	FBtr0335266	TRINITY_DN1020_c0_g2_i11	FBtr0085966	FBgn0033047	INE-1	First exon	9.50432	0.999563
Gut	SLA-001	FBtr0335266	TRINITY_DN1020_c0_g2_i11	FBtr0085966	FBgn0033047	INE-1	Last exon	9.50432	0.999563
Gut	SLA-001	FBtr0335266	TRINITY_DN1020_c0_g2_i5	FBtr0335266	FBgn0033047	INE-1	First exon	19.3538	0.998238
Gut	SLA-001	FBtr0335266	TRINITY_DN1020_c0_g2_i5	FBtr0335266	FBgn0033047	INE-1	Last exon	19.3538	0.998238
Gut	SLA-001	FBtr0336467	TRINITY_DN747_c0_g2_i7	MSTRG.9499.1	FBgn0042693	roo	Middle exon	31.4366	0.999995
Gut	SLA-001	FBtr0336467	TRINITY_DN747_c0_g2_i8	MSTRG.9499.3	FBgn0042693	roo	Middle exon	5.58237	0.999992
Gut	SLA-001	FBtr0336480	TRINITY_DN4065_c2_g1_i5	FBtr0336481	FBgn0037228	INE-1	Middle exon	16.7252	0.99784
Gut	SLA-001	FBtr0336480	TRINITY_DN4065_c2_g1_i5	FBtr0336481	FBgn0037228	INE-1	Last exon	16.7252	0.99784
Gut	SLA-001	FBtr0339732	TRINITY_DN18304_c0_g1_i1	FBtr0339732	FBgn0265422	INE-1	Unique	6.71589	0.143433
Gut	SLA-001	FBtr0339961	TRINITY_DN313_c0_g2_i1	FBtr0339961	FBgn0000289	roo	Middle exon	14.0658	1
Gut	SLA-001	FBtr0339961	TRINITY_DN313_c0_g2_i1	FBtr0339961	FBgn0000289	roo	Last exon	14.0658	1
Gut	SLA-001	FBtr0340082	TRINITY_DN1905_c1_g1_i1	FBtr0340082	FBgn0003575	roo	Middle exon	5.45903	1
Gut	SLA-001	FBtr0340412	TRINITY_DN4646_c0_g1_i3	FBtr0340412	FBgn0052647	roo	First exon	7.03633	0.0928646
Gut	SLA-001	FBtr0340412	TRINITY_DN4646_c0_g1_i3	FBtr0340412	FBgn0052647	roo	Middle exon	7.03633	0.0928646
Gut	SLA-001	FBtr0340488	TRINITY_DN3715_c0_g2_i2	FBtr0340488	FBgn0265630	roo	Middle exon	10.0897	1
Gut	SLA-001	FBtr0340579	TRINITY_DN5965_c1_g1_i2	FBtr0340579	FBgn0265669	Tc1	First exon	15.1966	0.0728067
Gut	SLA-001	FBtr0340579	TRINITY_DN5965_c1_g1_i2	FBtr0340579	FBgn0265669	Tc1	Middle exon	15.1966	0.0728067
Gut	SLA-001	FBtr0342743	TRINITY_DN3138_c1_g1_i3	FBtr0342743	FBgn0260780	roo	Middle exon	28.6042	1
Gut	SLA-001	FBtr0343305	TRINITY_DN5473_c0_g1_i2	FBtr0343305	FBgn0266044	Gypsy-1_Dsim	Unique	24.0069	0.0376097
Gut	SLA-001	FBtr0343363	TRINITY_DN3373_c0_g1_i2	FBtr0343363	FBgn0027528	jockey2	Last exon	56.6843	1
Gut	SLA-001	FBtr0343410	TRINITY_DN9241_c0_g1_i1	FBtr0100081	FBgn0054026	LARD	Last exon	77.5051	0.292237
Gut	SLA-001	FBtr0343556	TRINITY_DN1039_c1_g3_i2	FBtr0343556	FBgn0266101	roo	Last exon	22.4119	0.999994
Gut	SLA-001	FBtr0343604	TRINITY_DN3166_c0_g1_i5	FBtr0343604	FBgn0030964	INE-1	Last exon	5.46039	0.976894
Gut	SLA-001	FBtr0343825	TRINITY_DN4217_c0_g1_i3	FBtr0343825	FBgn0032688	roo	Last exon	6.23232	1
Gut	SLA-001	FBtr0343891	TRINITY_DN996_c1_g1_i1	FBtr0343891	FBgn0266228	gypsy	Unique	4.531	0.0778665
Gut	SLA-001	FBtr0343891	TRINITY_DN996_c1_g1_i1	FBtr0343891	FBgn0266228	gypsy12	Unique	4.531	0.0778665
Gut	SLA-001	FBtr0344027	TRINITY_DN5866_c0_g1_i1	FBtr0344027	FBgn0264548	INE-1	Unique	3.45664	0.0101787
Gut	SLA-001	FBtr0344082	TRINITY_DN665_c1_g1_i2	FBtr0111125	FBgn0002566	Gypsy-26_Dya	Last exon	9.23129	0.959642
Gut	SLA-001	FBtr0344082	TRINITY_DN665_c1_g1_i2	FBtr0111125	FBgn0002566	INE-1	Last exon	9.23129	0.959642
Gut	SLA-001	FBtr0344082	TRINITY_DN665_c1_g1_i2	FBtr0111125	FBgn0002566	gypsy8	Last exon	9.23129	0.959642
Gut	SLA-001	FBtr0344093	TRINITY_DN6405_c0_g1_i1	FBtr0344093	FBgn0260987	INE-1	Last exon	4.708	0.99996
Gut	SLA-001	FBtr0344187	TRINITY_DN6026_c0_g1_i1	FBtr0344187	FBgn0069969	INE-1	Last exon	5.69095	0.847735
Gut	SLA-001	FBtr0344383	TRINITY_DN2381_c0_g1_i3	FBtr0344383	FBgn0262127	roo	Last exon	19.1619	1
Gut	SLA-001	FBtr0344383	TRINITY_DN2381_c0_g1_i3	FBtr0344383	FBgn0262127	roo	First exon	19.1619	1
Gut	SLA-001	FBtr0344752	TRINITY_DN216_c2_g2_i3	FBtr0344752	FBgn0266579	roo	First exon	19.2072	0.996918
Gut	SLA-001	FBtr0344983	TRINITY_DN41_c0_g1_i1	FBtr0344983	FBgn0004179	roo	Middle exon	33.6684	0.870708
Gut	SLA-001	FBtr0345028	TRINITY_DN2526_c0_g1_i13	MSTRG.5619.2	FBgn0035388	roo	Middle exon	77.7909	0.999868
Gut	SLA-001	FBtr0345054	TRINITY_DN5418_c1_g1_i12	FBtr0345054	FBgn0266687	Cr1a	First exon	4.24286	0.0806991
Gut	SLA-001	FBtr0345054	TRINITY_DN5418_c1_g1_i12	FBtr0345054	FBgn0266687	Cr1a	Last exon	4.24286	0.0806991
Gut	SLA-001	FBtr0345227	TRINITY_DN475_c0_g1_i1	FBtr0345227	FBgn0000659	roo	Unique	62.0251	0.999284
Gut	SLA-001	FBtr0345299	TRINITY_DN8703_c0_g1_i1	MSTRG.10300.1	FBgn0039282	roo	Middle exon	3.2385	1
Gut	SLA-001	FBtr0345584	TRINITY_DN3110_c0_g3_i1	MSTRG.3326.2	FBgn0033574	INE-1	Last exon	51.9033	0.998049
Gut	SLA-001	FBtr0345638	TRINITY_DN402_c13_g1_i1	FBtr0079429	FBgn0051908	roo	Last exon	79.7617	0.999248
Gut	SLA-001	FBtr0345806	TRINITY_DN805_c1_g1_i1	FBtr0075098	FBgn0042134	roo	Last exon	75.5004	1
Gut	SLA-001	FBtr0345859	TRINITY_DN6241_c0_g1_i3	FBtr0304979	FBgn0262533	INE-1	First exon	1.42729	0.941344
Gut	SLA-001	FBtr0345920	TRINITY_DN1829_c0_g1_i5	FBtr0345920	FBgn0040028	INE-1	Last exon	4.63471	0.998576
Gut	SLA-001	FBtr0346281	TRINITY_DN1811_c0_g1_i1	MSTRG.12268.4	FBgn0052642	roo	Middle exon	21.5111	0.996331
Gut	SLA-001	FBtr0346281	TRINITY_DN1811_c0_g1_i4	MSTRG.12268.6	FBgn0052642	roo	Middle exon	38.6078	0.997941
Gut	SLA-001	FBtr0346281	TRINITY_DN1811_c0_g1_i5	MSTRG.12268.3	FBgn0052642	roo	Middle exon	2.29917	0.998121
Gut	SLA-001	FBtr0346555	TRINITY_DN5758_c0_g1_i6	FBtr0346555	FBgn0267300	Rt1b	Last exon	6.29576	0.00592444
Gut	SLA-001	FBtr0346818	TRINITY_DN1982_c0_g1_i2	FBtr0346818	FBgn0037098	roo	Middle exon	3.35248	1
Gut	SLA-001	FBtr0346819	TRINITY_DN1982_c0_g1_i15	FBtr0346819	FBgn0037098	roo	Middle exon	3.44976	1
Gut	SLA-001	FBtr0347015	TRINITY_DN4356_c0_g1_i12	FBtr0347015	FBgn0267585	Stalker	Unique	2.34323	1
Gut	SLA-001	FBtr0347016	TRINITY_DN4356_c0_g1_i43	FBtr0347016	FBgn0267585	Stalker	First exon	2.37844	0.999999
Gut	SLA-001	FBtr0415455	TRINITY_DN4130_c0_g1_i1	FBtr0415455	FBgn0278598	INE-1	Last exon	3.49125	0.0269086
Gut	SLA-001	FBtr0415458	TRINITY_DN4130_c0_g1_i6	FBtr0415458	FBgn0278598	INE-1	Last exon	23.3212	0.97923
Gut	SLA-001	FBtr0472956	TRINITY_DN65_c5_g1_i6	FBtr0472956	FBgn0052582	INE-1	First exon	5.07655	0.195125
Gut	SLA-001	FBtr0472957	TRINITY_DN65_c5_g1_i5	FBtr0472957	FBgn0052582	INE-1	First exon	1.50434	0.0833101
Gut	SLA-001	FBtr0473377	TRINITY_DN4604_c0_g1_i2	FBtr0473377	FBgn0286030	Rt1a	Unique	35.6309	0.0421223
Gut	SLA-001	FBtr0473619	TRINITY_DN5555_c0_g1_i2	FBtr0473619	FBgn0036220	INE-1	Last exon	5.30512	0.986371
Gut	SLA-001	FBtr0475062	TRINITY_DN5426_c0_g1_i6	FBtr0475062	FBgn0286884	INE-1	Unique	1.53565	0.109737
Gut	SLA-001	FBtr0475316	TRINITY_DN65_c7_g1_i2	FBtr0475316	FBgn0260721	INE-1	Unique	15.4596	0.210249
Gut	TOM-007	FBtr0070042	TRINITY_DN1917_c0_g2_i5	FBtr0070042	FBgn0264492	1360	Last exon	37.4586	0.936245
Gut	TOM-007	FBtr0070042	TRINITY_DN1917_c0_g2_i5	FBtr0070042	FBgn0264492	hopper2	Last exon	37.4586	0.936245
Gut	TOM-007	FBtr0070043	TRINITY_DN1917_c0_g2_i3	FBtr0070043	FBgn0264492	1360	Last exon	9.18405	0.9342
Gut	TOM-007	FBtr0070043	TRINITY_DN1917_c0_g2_i3	FBtr0070043	FBgn0264492	hopper2	Last exon	9.18405	0.9342
Gut	TOM-007	FBtr0070044	TRINITY_DN1917_c0_g2_i2	FBtr0070044	FBgn0264492	1360	Last exon	8.23522	0.944766
Gut	TOM-007	FBtr0070044	TRINITY_DN1917_c0_g2_i2	FBtr0070044	FBgn0264492	hopper2	Last exon	8.23522	0.944766
Gut	TOM-007	FBtr0070046	TRINITY_DN1436_c0_g1_i3	FBtr0070046	FBgn0052350	1360	Unique	30.0941	0.999997
Gut	TOM-007	FBtr0070351	TRINITY_DN672_c2_g1_i1	FBtr0070351	FBgn0023512	LARD	Last exon	65.2734	1
Gut	TOM-007	FBtr0070396	TRINITY_DN1712_c2_g3_i9	FBtr0070396	FBgn0000810	roo	First exon	29.3692	0.999457
Gut	TOM-007	FBtr0070669	TRINITY_DN761_c8_g1_i1	FBtr0070669	FBgn0026079	hopper2	Last exon	75.97	1
Gut	TOM-007	FBtr0070680	TRINITY_DN238_c3_g3_i16	FBtr0070680	FBgn0003053	roo	Last exon	36.1299	1
Gut	TOM-007	FBtr0070829	TRINITY_DN2206_c0_g1_i36	FBtr0070829	FBgn0014340	G5A	Unique	14.0438	1
Gut	TOM-007	FBtr0070950	TRINITY_DN1188_c4_g1_i1	FBtr0070950	FBgn0028360	roo	Last exon	58.0281	0.999998
Gut	TOM-007	FBtr0071009	TRINITY_DN2321_c1_g1_i1	FBtr0343331	FBgn0029929	INE-1	Unique	80.722	0.988019
Gut	TOM-007	FBtr0071214	TRINITY_DN1780_c0_g1_i11	MSTRG.11858.1	FBgn0030052	P-element	First exon	42.2501	0.999999
Gut	TOM-007	FBtr0071342	TRINITY_DN237_c3_g1_i1	FBtr0071342	FBgn0030096	INE-1	Last exon	76.68	0.999949
Gut	TOM-007	FBtr0071604	TRINITY_DN328_c0_g1_i1	FBtr0071604	FBgn0020306	roo	Last exon	57.0702	1
Gut	TOM-007	FBtr0071811	TRINITY_DN1446_c0_g1_i2	MSTRG.4805.3	FBgn0034717	LARD	Last exon	24.1112	1
Gut	TOM-007	FBtr0071811	TRINITY_DN1446_c0_g1_i4	MSTRG.4805.2	FBgn0034717	LARD	Last exon	16.2408	1
Gut	TOM-007	FBtr0072578	TRINITY_DN803_c1_g1_i1	FBtr0072578	FBgn0000575	roo	First exon	71.2226	0.935058
Gut	TOM-007	FBtr0072589	TRINITY_DN3291_c2_g1_i1	FBtr0072589	FBgn0052479	roo	Middle exon	29.4913	1
Gut	TOM-007	FBtr0073518	TRINITY_DN2012_c0_g1_i6	FBtr0073519	FBgn0030318	Tom1	Last exon	72.6788	0.999559
Gut	TOM-007	FBtr0073573	TRINITY_DN3256_c0_g1_i1	MSTRG.12186.2	FBgn0260780	roo	Middle exon	69.5924	1
Gut	TOM-007	FBtr0073591	TRINITY_DN2287_c0_g1_i3	FBtr0073591	FBgn0030357	LARD	Middle exon	3.87987	0.822965
Gut	TOM-007	FBtr0073841	TRINITY_DN246_c1_g1_i4	FBtr0073841	FBgn0001612	roo	Middle exon	9.18096	1
Gut	TOM-007	FBtr0074201	TRINITY_DN94_c0_g2_i2	FBtr0074201	FBgn0030680	jockey2	First exon	15.5267	0.999998
Gut	TOM-007	FBtr0074634	TRINITY_DN875_c0_g1_i2	FBtr0074634	FBgn0283473	roo	First exon	35.276	0.999891
Gut	TOM-007	FBtr0074674	TRINITY_DN4094_c0_g1_i1	FBtr0074674	FBgn0031001	roo	First exon	2.0074	1
Gut	TOM-007	FBtr0074696	TRINITY_DN1790_c0_g3_i1	FBtr0074696	FBgn0030995	INE-1	Unique	27.1846	0.997593
Gut	TOM-007	FBtr0074747	TRINITY_DN2206_c0_g1_i33	FBtr0344152	FBgn0031054	G5A	Last exon	81.2152	0.932102
Gut	TOM-007	FBtr0075054	TRINITY_DN1162_c8_g1_i1	FBtr0075054	FBgn0036811	roo	Last exon	98.4285	0.91334
Gut	TOM-007	FBtr0075171	TRINITY_DN870_c0_g1_i3	FBtr0075171	FBgn0052190	roo	Last exon	81.0144	0.999995
Gut	TOM-007	FBtr0075330	TRINITY_DN6150_c0_g1_i1	FBtr0075330	FBgn0036668	roo	Last exon	49.4165	1
Gut	TOM-007	FBtr0075580	TRINITY_DN1688_c0_g3_i1	FBtr0075580	FBgn0041160	roo	Last exon	62.9432	0.995693
Gut	TOM-007	FBtr0075754	TRINITY_DN366_c2_g1_i1	FBtr0075754	FBgn0036382	roo	First exon	66.5672	0.653803
Gut	TOM-007	FBtr0075986	TRINITY_DN941_c0_g1_i8	FBtr0075986	FBgn0052104	jockey	Last exon	3.90025	1
Gut	TOM-007	FBtr0076270	TRINITY_DN177_c1_g1_i22	FBtr0076270	FBgn0036107	pogo	First exon	10.2202	0.905175
Gut	TOM-007	FBtr0076369	TRINITY_DN4969_c1_g1_i1	FBtr0076369	FBgn0015618	roo	Last exon	26.955	0.999847
Gut	TOM-007	FBtr0076396	TRINITY_DN4312_c1_g1_i1	FBtr0330098	FBgn0036032	roo	Last exon	14.7337	1
Gut	TOM-007	FBtr0076504	TRINITY_DN628_c0_g4_i1	FBtr0076504	FBgn0035993	INE-1	Last exon	42.9539	0.99928
Gut	TOM-007	FBtr0076945	TRINITY_DN1174_c1_g2_i21	FBtr0076945	FBgn0041194	Gypsy-2_Dsim	Last exon	53.2584	0.999745
Gut	TOM-007	FBtr0077267	TRINITY_DN2267_c0_g1_i1	MSTRG.13048.1	FBgn0031144	Tc3	Last exon	28.4938	0.999734
Gut	TOM-007	FBtr0077371	TRINITY_DN2206_c0_g1_i22	MSTRG.13100.16	FBgn0024807	G5A	Last exon	12.8116	0.920213
Gut	TOM-007	FBtr0077557	TRINITY_DN481_c0_g3_i1	FBtr0077557	FBgn0002985	roo	Last exon	71.3609	0.9987
Gut	TOM-007	FBtr0077706	TRINITY_DN6115_c0_g1_i22	MSTRG.325.6	FBgn0031449	jockey	First exon	14.9384	0.999993
Gut	TOM-007	FBtr0077957	TRINITY_DN400_c12_g1_i1	FBtr0077957	FBgn0031306	roo	First exon	48.5297	0.980567
Gut	TOM-007	FBtr0078096	TRINITY_DN4387_c0_g1_i1	FBtr0078096	FBgn0051921	Copia	Unique	4.14724	0.999989
Gut	TOM-007	FBtr0078144	TRINITY_DN1162_c2_g2_i4	FBtr0078144	FBgn0266557	roo	First exon	11.3273	1
Gut	TOM-007	FBtr0078153	TRINITY_DN2018_c0_g1_i4	MSTRG.20.13	FBgn0025683	Quasimodo2	Middle exon	16.7178	0.999998
Gut	TOM-007	FBtr0078240	TRINITY_DN1468_c0_g1_i14	FBtr0078240	FBgn0036978	pogo	Last exon	27.252	1
Gut	TOM-007	FBtr0078396	TRINITY_DN4122_c0_g2_i2	FBtr0078396	FBgn0283479	Tc1	Last exon	13.2612	0.999955
Gut	TOM-007	FBtr0078486	TRINITY_DN1617_c0_g1_i14	FBtr0078486	FBgn0027532	INE-1	First exon	28.2598	1
Gut	TOM-007	FBtr0078495	TRINITY_DN462_c0_g1_i4	FBtr0078495	FBgn0004179	roo	Middle exon	9.73597	0.802488
Gut	TOM-007	FBtr0078642	TRINITY_DN1065_c0_g1_i11	FBtr0078642	FBgn0037387	INE-1	First exon	1.79661	0.999722
Gut	TOM-007	FBtr0078962	TRINITY_DN3425_c1_g1_i2	FBtr0078962	FBgn0037213	INE-1	Last exon	1.45402	0.999945
Gut	TOM-007	FBtr0079139	TRINITY_DN697_c2_g2_i1	FBtr0079139	FBgn0031740	roo	Last exon	37.2528	0.999923
Gut	TOM-007	FBtr0079176	TRINITY_DN62_c0_g1_i2	FBtr0079176	FBgn0001942	blood	Middle exon	32.7396	0.999843
Gut	TOM-007	FBtr0079178	TRINITY_DN62_c0_g1_i4	FBtr0079178	FBgn0001942	blood	Middle exon	15.3974	0.999474
Gut	TOM-007	FBtr0079356	TRINITY_DN214_c0_g1_i1	FBtr0346716	FBgn0264922	mdg1	First exon	97.8349	0.876398
Gut	TOM-007	FBtr0080187	TRINITY_DN3169_c3_g2_i1	FBtr0080187	FBgn0032305	roo	Middle exon	63.9343	1
Gut	TOM-007	FBtr0080189	TRINITY_DN3345_c1_g1_i2	FBtr0080189	FBgn0051869	roo	Last exon	16.579	0.999999
Gut	TOM-007	FBtr0080200	TRINITY_DN188_c5_g1_i2	FBtr0080200	FBgn0032348	roo	Last exon	19.5088	1
Gut	TOM-007	FBtr0080287	TRINITY_DN679_c6_g1_i2	FBtr0080287	FBgn0051866	roo	Last exon	79.5573	0.996987
Gut	TOM-007	FBtr0080411	TRINITY_DN27061_c0_g1_i1	FBtr0080411	FBgn0032444	Idefix	Last exon	74.9378	0.999991
Gut	TOM-007	FBtr0080642	TRINITY_DN2323_c0_g1_i1	FBtr0080642	FBgn0264253	INE-1	Unique	79.4684	0.813507
Gut	TOM-007	FBtr0081070	TRINITY_DN3163_c0_g1_i5	FBtr0081070	FBgn0032688	roo	Last exon	22.3043	1
Gut	TOM-007	FBtr0081336	TRINITY_DN347_c0_g4_i7	FBtr0081336	FBgn0032850	INE-1	Middle exon	1.96773	0.876883
Gut	TOM-007	FBtr0081461	TRINITY_DN1329_c0_g1_i2	FBtr0346711	FBgn0010395	INE-1	Last exon	62.9827	1
Gut	TOM-007	FBtr0081517	TRINITY_DN1682_c0_g4_i1	FBtr0081517	FBgn0032945	INE-1	Last exon	70.8058	1
Gut	TOM-007	FBtr0081612	TRINITY_DN986_c1_g1_i2	FBtr0081612	FBgn0261238	roo	Middle exon	8.97969	1
Gut	TOM-007	FBtr0081614	TRINITY_DN986_c1_g1_i12	FBtr0081614	FBgn0261238	roo	Middle exon	3.77828	0.999995
Gut	TOM-007	FBtr0082116	TRINITY_DN4390_c1_g1_i10	FBtr0082116	FBgn0037705	roo	First exon	17.2335	0.999997
Gut	TOM-007	FBtr0082396	TRINITY_DN1551_c0_g1_i1	FBtr0082396	FBgn0037906	roo	First exon	67.0195	0.984825
Gut	TOM-007	FBtr0083218	TRINITY_DN745_c1_g4_i1	FBtr0083218	FBgn0038391	roo	Middle exon	79.2138	1
Gut	TOM-007	FBtr0083221	TRINITY_DN3400_c0_g1_i2	FBtr0083221	FBgn0003117	roo	Last exon	4.95758	0.999879
Gut	TOM-007	FBtr0083452	TRINITY_DN1942_c2_g1_i1	FBtr0083452	FBgn0038499	jockey	Last exon	9.03277	0.999998
Gut	TOM-007	FBtr0083553	TRINITY_DN114_c0_g1_i5	FBtr0083553	FBgn0042693	roo	Middle exon	18.9663	0.999954
Gut	TOM-007	FBtr0083661	TRINITY_DN1940_c1_g3_i1	FBtr0083661	FBgn0044871	1360	Last exon	76.8727	0.985529
Gut	TOM-007	FBtr0083731	TRINITY_DN703_c0_g1_i1	FBtr0083731	FBgn0038681	Bari1	Last exon	17.6475	0.999784
Gut	TOM-007	FBtr0083795	TRINITY_DN1873_c0_g1_i1	FBtr0083795	FBgn0014135	roo	Middle exon	5.33713	0.999999
Gut	TOM-007	FBtr0083914	TRINITY_DN2875_c0_g1_i2	FBtr0083916	FBgn0001169	roo	Middle exon	22.4733	1
Gut	TOM-007	FBtr0083917	TRINITY_DN2875_c0_g1_i1	FBtr0083917	FBgn0001169	roo	First exon	5.84504	1
Gut	TOM-007	FBtr0084177	TRINITY_DN481_c0_g1_i4	FBtr0084177	FBgn0264491	roo	Last exon	17.0404	0.993963
Gut	TOM-007	FBtr0084190	TRINITY_DN579_c0_g1_i2	FBtr0084190	FBgn0038922	P-element	First exon	80.0843	0.99942
Gut	TOM-007	FBtr0084277	TRINITY_DN177_c1_g1_i23	FBtr0084277	FBgn0051156	pogo	Last exon	11.4997	1
Gut	TOM-007	FBtr0084479	TRINITY_DN1370_c0_g1_i1	FBtr0084479	FBgn0051145	roo	Middle exon	49.007	0.999964
Gut	TOM-007	FBtr0084898	TRINITY_DN4522_c1_g1_i5	FBtr0084898	FBgn0261986	roo	Middle exon	24.7019	0.999977
Gut	TOM-007	FBtr0085221	TRINITY_DN954_c0_g2_i1	FBtr0085221	FBgn0045862	roo	Unique	3.38641	1
Gut	TOM-007	FBtr0085355	TRINITY_DN19235_c0_g1_i1	FBtr0085355	FBgn0039601	roo	Last exon	64.9642	0.999994
Gut	TOM-007	FBtr0085718	TRINITY_DN24643_c0_g1_i1	FBtr0085718	FBgn0039807	roo	Unique	21.7974	0.998339
Gut	TOM-007	FBtr0085877	TRINITY_DN1323_c0_g1_i1	FBtr0085877	FBgn0040206	INE-1	Last exon	42.9249	0.981317
Gut	TOM-007	FBtr0086079	TRINITY_DN4048_c1_g1_i7	MSTRG.2608.2	FBgn0033010	INE-1	Last exon	6.604	0.97853
Gut	TOM-007	FBtr0086081	TRINITY_DN4048_c1_g1_i18	FBtr0086081	FBgn0033010	INE-1	Last exon	50.6301	0.999989
Gut	TOM-007	FBtr0086516	TRINITY_DN508_c0_g1_i3	FBtr0086516	FBgn0086358	roo	Middle exon	56.395	1
Gut	TOM-007	FBtr0086621	TRINITY_DN1099_c0_g1_i5	FBtr0086621	FBgn0034407	Burdock	First exon	29.7853	0.180616
Gut	TOM-007	FBtr0086673	TRINITY_DN3799_c2_g2_i1	FBtr0086673	FBgn0063495	Idefix	First exon	44.5794	0.890794
Gut	TOM-007	FBtr0086673	TRINITY_DN3799_c2_g2_i1	FBtr0086673	FBgn0063495	Idefix	Last exon	44.5794	0.890794
Gut	TOM-007	FBtr0087242	TRINITY_DN763_c0_g1_i1	FBtr0087242	FBgn0034087	INE-1	Last exon	18.206	1
Gut	TOM-007	FBtr0087242	TRINITY_DN763_c0_g1_i3	MSTRG.3994.2	FBgn0034087	INE-1	Last exon	39.1506	1
Gut	TOM-007	FBtr0087343	TRINITY_DN876_c1_g1_i30	FBtr0087343	FBgn0023441	roo	Last exon	3.48176	1
Gut	TOM-007	FBtr0087346	TRINITY_DN876_c1_g1_i17	FBtr0087346	FBgn0023441	roo	Last exon	13.1393	1
Gut	TOM-007	FBtr0087370	TRINITY_DN362_c0_g1_i1	FBtr0087370	FBgn0286785	INE-1	Last exon	81.465	1
Gut	TOM-007	FBtr0087392	TRINITY_DN4208_c0_g1_i1	FBtr0087392	FBgn0034008	hopper2	Unique	56.7873	0.976295
Gut	TOM-007	FBtr0087547	TRINITY_DN28230_c0_g1_i1	FBtr0087547	FBgn0033928	P-element	Unique	13.748	0.975386
Gut	TOM-007	FBtr0087601	TRINITY_DN4261_c1_g1_i1	FBtr0087601	FBgn0040752	roo	Last exon	18.7873	1
Gut	TOM-007	FBtr0088074	TRINITY_DN2156_c0_g1_i5	FBtr0088074	FBgn0050035	INE-1	First exon	4.944	0.9996
Gut	TOM-007	FBtr0088376	TRINITY_DN1628_c0_g1_i2	MSTRG.3179.1	FBgn0033458	roo	First exon	68.3989	0.999655
Gut	TOM-007	FBtr0088487	TRINITY_DN532_c0_g2_i3	FBtr0088487	FBgn0033448	roo	First exon	31.851	0.999947
Gut	TOM-007	FBtr0089052	TRINITY_DN4978_c0_g1_i1	FBtr0089052	FBgn0002930	roo	Middle exon	90.447	0.999979
Gut	TOM-007	FBtr0089056	TRINITY_DN59_c0_g3_i1	FBtr0089056	FBgn0015038	INE-1	Last exon	79.2596	0.999917
Gut	TOM-007	FBtr0089261	TRINITY_DN1797_c0_g1_i1	MSTRG.12590.4	FBgn0278608	roo	Middle exon	2.31168	0.947464
Gut	TOM-007	FBtr0089261	TRINITY_DN1797_c0_g1_i4	MSTRG.12590.3	FBgn0278608	roo	Middle exon	36.0461	0.943211
Gut	TOM-007	FBtr0089261	TRINITY_DN1797_c0_g1_i7	MSTRG.12590.2	FBgn0278608	roo	Middle exon	2.49036	0.953746
Gut	TOM-007	FBtr0089263	TRINITY_DN1797_c0_g1_i3	FBtr0089263	FBgn0278608	roo	Middle exon	2.03836	0.971402
Gut	TOM-007	FBtr0089361	TRINITY_DN687_c0_g1_i19	FBtr0089361	FBgn0283521	roo	Last exon	6.42036	0.999995
Gut	TOM-007	FBtr0089479	TRINITY_DN556_c0_g1_i12	FBtr0089479	FBgn0036640	TART-A	Middle exon	46.0301	1
Gut	TOM-007	FBtr0089479	TRINITY_DN556_c0_g1_i12	FBtr0089479	FBgn0036640	TART-A	Last exon	46.0301	1
Gut	TOM-007	FBtr0089850	TRINITY_DN867_c5_g1_i1	FBtr0089850	FBgn0035802	roo	Middle exon	51.094	1
Gut	TOM-007	FBtr0100362	TRINITY_DN3044_c0_g1_i1	FBtr0100362	FBgn0027375	INE-1	Middle exon	3.00418	0.994441
Gut	TOM-007	FBtr0100460	TRINITY_DN177_c1_g1_i25	MSTRG.3265.1	FBgn0262114	pogo	Last exon	4.35965	0.99973
Gut	TOM-007	FBtr0100460	TRINITY_DN177_c1_g1_i25	MSTRG.3265.1	FBgn0262114	roo	Middle exon	4.35965	0.99973
Gut	TOM-007	FBtr0100460	TRINITY_DN177_c1_g1_i53	FBtr0100460	FBgn0262114	pogo	Last exon	16.9995	1
Gut	TOM-007	FBtr0100460	TRINITY_DN177_c1_g1_i53	FBtr0100460	FBgn0262114	roo	Middle exon	16.9995	1
Gut	TOM-007	FBtr0100511	TRINITY_DN1952_c0_g1_i1	FBtr0100511	FBgn0032955	INE-1	Last exon	14.9937	0.825084
Gut	TOM-007	FBtr0100599	TRINITY_DN1007_c0_g1_i2	FBtr0100599	FBgn0024251	roo	Middle exon	47.8293	1
Gut	TOM-007	FBtr0110916	TRINITY_DN597_c0_g1_i107	FBtr0110916	FBgn0260003	roo	First exon	2.91873	1
Gut	TOM-007	FBtr0111111	TRINITY_DN2200_c0_g1_i1	FBtr0308810	FBgn0046692	Gypsy-1_Dsim	Last exon	61.1808	0.834154
Gut	TOM-007	FBtr0111111	TRINITY_DN2200_c0_g1_i1	FBtr0308810	FBgn0046692	Gypsy-6_Dse	Last exon	61.1808	0.834154
Gut	TOM-007	FBtr0111111	TRINITY_DN2200_c0_g1_i8	MSTRG.2585.1	FBgn0046692	Gypsy-1_Dsim	Last exon	8.3872	0.111446
Gut	TOM-007	FBtr0111111	TRINITY_DN2200_c0_g1_i8	MSTRG.2585.1	FBgn0046692	Gypsy-6_Dse	Last exon	8.3872	0.111446
Gut	TOM-007	FBtr0111144	TRINITY_DN1940_c1_g4_i1	FBtr0111144	FBgn0287187	1360	Last exon	49.6758	0.0111056
Gut	TOM-007	FBtr0111299	TRINITY_DN702_c0_g1_i2	MSTRG.2577.1	FBgn0262115	gypsy2	Last exon	9.59262	0.743764
Gut	TOM-007	FBtr0111300	TRINITY_DN702_c0_g1_i4	FBtr0111300	FBgn0262115	gypsy2	Last exon	3.60701	0.993122
Gut	TOM-007	FBtr0112642	TRINITY_DN2875_c1_g1_i8	FBtr0112642	FBgn0085424	roo	First exon	5.11168	1
Gut	TOM-007	FBtr0112820	TRINITY_DN745_c10_g1_i5	FBtr0112820	FBgn0003175	roo	Middle exon	19.4934	1
Gut	TOM-007	FBtr0112868	TRINITY_DN1682_c1_g1_i1	MSTRG.12600.3	FBgn0011742	INE-1	Last exon	9.75463	0.998033
Gut	TOM-007	FBtr0112921	TRINITY_DN2441_c0_g1_i9	FBtr0112921	FBgn0025837	INE-1	Last exon	60.9664	0.999983
Gut	TOM-007	FBtr0113257	TRINITY_DN355_c0_g1_i6	MSTRG.9787.1	FBgn0038842	INE-1	Last exon	20.5856	0.997265
Gut	TOM-007	FBtr0113414	TRINITY_DN168_c0_g1_i9	MSTRG.1892.9	FBgn0051809	H	First exon	44.0309	0.719374
Gut	TOM-007	FBtr0113748	TRINITY_DN1119_c0_g1_i2	MSTRG.7894.1	FBgn0287182	Cr1a	Last exon	50.6372	1
Gut	TOM-007	FBtr0113761	TRINITY_DN1669_c0_g1_i4	MSTRG.2540.3	FBgn0039993	INE-1	Middle exon	22.7078	0.00551706
Gut	TOM-007	FBtr0113830	TRINITY_DN1682_c0_g1_i1	MSTRG.2539.5	FBgn0267861	INE-1	Last exon	7.89735	0.266279
Gut	TOM-007	FBtr0113895	TRINITY_DN5043_c2_g1_i1	FBtr0113895	FBgn0263977	INE-1	Last exon	90.193	0.606989
Gut	TOM-007	FBtr0290246	TRINITY_DN3345_c1_g1_i1	FBtr0290246	FBgn0051869	roo	Last exon	14.5147	1
Gut	TOM-007	FBtr0290277	TRINITY_DN203_c0_g2_i4	FBtr0290277	FBgn0035798	roo	Last exon	3.18872	1
Gut	TOM-007	FBtr0299616	TRINITY_DN5973_c0_g1_i3	FBtr0299616	FBgn0259167	roo	First exon	4.93586	0.999924
Gut	TOM-007	FBtr0299789	TRINITY_DN2250_c0_g1_i1	FBtr0299789	FBgn0259227	roo	Middle exon	21.1472	1
Gut	TOM-007	FBtr0300123	TRINITY_DN1873_c0_g1_i3	FBtr0300123	FBgn0014135	roo	Middle exon	2.99729	0.999994
Gut	TOM-007	FBtr0300751	TRINITY_DN1780_c0_g1_i9	FBtr0300751	FBgn0030052	P-element	First exon	17.1371	0.999999
Gut	TOM-007	FBtr0301040	TRINITY_DN1623_c0_g1_i1	MSTRG.1113.8	FBgn0052982	roo	Middle exon	11.5793	0.999998
Gut	TOM-007	FBtr0301040	TRINITY_DN1623_c0_g1_i4	FBtr0301040	FBgn0052982	roo	Middle exon	4.12834	1
Gut	TOM-007	FBtr0301040	TRINITY_DN1623_c0_g1_i5	MSTRG.1113.6	FBgn0052982	roo	Middle exon	7.29038	0.999999
Gut	TOM-007	FBtr0301151	TRINITY_DN5020_c0_g1_i1	FBtr0301151	FBgn0020880	roo	Unique	10.0965	0.999999
Gut	TOM-007	FBtr0301363	TRINITY_DN381_c1_g1_i2	FBtr0301363	FBgn0033313	roo	Middle exon	25.6329	1
Gut	TOM-007	FBtr0301783	TRINITY_DN711_c1_g2_i4	FBtr0301783	FBgn0260008	Tc1-2	Last exon	30.087	0.0834783
Gut	TOM-007	FBtr0301784	TRINITY_DN711_c1_g2_i5	FBtr0301784	FBgn0260008	Tc1-2	Last exon	10.6379	0.0857537
Gut	TOM-007	FBtr0301785	TRINITY_DN711_c1_g2_i1	FBtr0301785	FBgn0260008	Tc1-2	Last exon	5.01829	0.0760291
Gut	TOM-007	FBtr0301792	TRINITY_DN5054_c0_g1_i1	FBtr0301792	FBgn0085638	INE-1	First exon	4.76886	0.449443
Gut	TOM-007	FBtr0302297	TRINITY_DN400_c4_g1_i12	FBtr0302297	FBgn0243516	roo	Middle exon	3.66709	0.999944
Gut	TOM-007	FBtr0302651	TRINITY_DN2718_c0_g1_i2	FBtr0302651	FBgn0261547	roo	Middle exon	21.6142	1
Gut	TOM-007	FBtr0302709	TRINITY_DN126_c1_g1_i7	FBtr0302709	FBgn0261555	roo	Last exon	18.7959	0.999978
Gut	TOM-007	FBtr0302710	TRINITY_DN126_c1_g1_i3	FBtr0302710	FBgn0261555	roo	Last exon	7.85331	1
Gut	TOM-007	FBtr0302964	TRINITY_DN177_c2_g1_i2	FBtr0302964	FBgn0030121	roo	Last exon	36.1774	0.999994
Gut	TOM-007	FBtr0303272	TRINITY_DN1589_c0_g1_i11	FBtr0303272	FBgn0261802	INE-1	Last exon	38.7509	1
Gut	TOM-007	FBtr0303272	TRINITY_DN1589_c0_g1_i11	FBtr0303272	FBgn0261802	gypsy6	First exon	38.7509	1
Gut	TOM-007	FBtr0303273	TRINITY_DN1589_c0_g1_i6	FBtr0303273	FBgn0261802	INE-1	Last exon	5.73452	1
Gut	TOM-007	FBtr0303273	TRINITY_DN1589_c0_g1_i6	FBtr0303273	FBgn0261802	gypsy6	First exon	5.73452	1
Gut	TOM-007	FBtr0303434	TRINITY_DN251_c4_g1_i5	MSTRG.3854.1	FBgn0261854	roo	Middle exon	35.0428	0.999941
Gut	TOM-007	FBtr0304697	TRINITY_DN1088_c0_g1_i2	MSTRG.3701.1	FBgn0000662	roo	First exon	7.43536	0.988701
Gut	TOM-007	FBtr0304697	TRINITY_DN1088_c0_g1_i6	MSTRG.3701.2	FBgn0000662	roo	First exon	29.9288	0.998794
Gut	TOM-007	FBtr0304887	TRINITY_DN1471_c0_g3_i4	FBtr0304887	FBgn0000286	roo	Middle exon	6.26952	0.998837
Gut	TOM-007	FBtr0304887	TRINITY_DN1471_c0_g3_i5	MSTRG.571.1	FBgn0000286	roo	Middle exon	11.1886	0.999262
Gut	TOM-007	FBtr0304978	TRINITY_DN5552_c0_g1_i1	FBtr0304978	FBgn0262532	INE-1	First exon	2.95699	0.683075
Gut	TOM-007	FBtr0305034	TRINITY_DN114_c0_g1_i8	FBtr0305034	FBgn0042693	roo	Middle exon	0.830449	0.99975
Gut	TOM-007	FBtr0305317	TRINITY_DN30_c0_g3_i7	MSTRG.3080.1	FBgn0050345	INE-1	Middle exon	58.2613	0.999224
Gut	TOM-007	FBtr0305354	TRINITY_DN1625_c0_g1_i33	FBtr0305354	FBgn0262617	roo	Middle exon	3.0931	1
Gut	TOM-007	FBtr0305620	TRINITY_DN4520_c0_g1_i1	FBtr0305620	FBgn0045852	roo	Last exon	8.88699	1
Gut	TOM-007	FBtr0305621	TRINITY_DN4520_c0_g1_i5	FBtr0305621	FBgn0045852	roo	Last exon	4.8008	1
Gut	TOM-007	FBtr0305946	TRINITY_DN1735_c0_g1_i19	FBtr0305946	FBgn0261698	roo	Middle exon	7.94195	1
Gut	TOM-007	FBtr0306031	TRINITY_DN4123_c0_g1_i8	FBtr0306031	FBgn0032908	INE-1	Last exon	1.5453	1
Gut	TOM-007	FBtr0306295	TRINITY_DN1404_c0_g1_i1	FBtr0306295	FBgn0262886	INE-1	Last exon	32.17	0.0277966
Gut	TOM-007	FBtr0306592	TRINITY_DN178_c0_g1_i37	MSTRG.2.1	FBgn0002121	INE-1	Last exon	67.258	1
Gut	TOM-007	FBtr0306592	TRINITY_DN178_c0_g1_i37	MSTRG.2.1	FBgn0002121	Idefix	Last exon	67.258	1
Gut	TOM-007	FBtr0307068	TRINITY_DN62_c0_g1_i3	FBtr0079175	FBgn0001942	blood	Last exon	40.1676	0.999815
Gut	TOM-007	FBtr0307094	TRINITY_DN2441_c0_g1_i7	FBtr0307094	FBgn0025837	INE-1	Last exon	9.01597	0.999859
Gut	TOM-007	FBtr0307095	TRINITY_DN2441_c0_g1_i10	FBtr0307095	FBgn0025837	INE-1	Last exon	3.09455	0.999839
Gut	TOM-007	FBtr0307898	TRINITY_DN1750_c0_g1_i10	FBtr0307898	FBgn0030412	roo	Middle exon	6.82094	1
Gut	TOM-007	FBtr0308254	TRINITY_DN1162_c2_g2_i10	FBtr0308254	FBgn0266557	roo	First exon	13.2912	1
Gut	TOM-007	FBtr0308599	TRINITY_DN4084_c0_g1_i28	FBtr0308599	FBgn0265998	roo	Middle exon	3.98241	1
Gut	TOM-007	FBtr0308647	TRINITY_DN1468_c0_g1_i18	FBtr0308647	FBgn0036978	pogo	Last exon	13.5967	0.999992
Gut	TOM-007	FBtr0309039	TRINITY_DN4352_c2_g1_i1	FBtr0305496	FBgn0262631	INE-1	Unique	8.75799	0.00894361
Gut	TOM-007	FBtr0309251	TRINITY_DN643_c0_g1_i51	FBtr0309251	FBgn0030087	roo	Middle exon	8.34533	1
Gut	TOM-007	FBtr0309524	TRINITY_DN595_c0_g2_i1	FBtr0309524	FBgn0263504	NOF	Last exon	37.3402	0.0231636
Gut	TOM-007	FBtr0309857	TRINITY_DN3586_c0_g1_i10	FBtr0309857	FBgn0086408	INE-1	Last exon	7.7577	1
Gut	TOM-007	FBtr0309857	TRINITY_DN3586_c0_g1_i7	FBtr0113110	FBgn0086408	INE-1	Last exon	3.5277	1
Gut	TOM-007	FBtr0310018	TRINITY_DN4700_c2_g1_i5	FBtr0310018	FBgn0261509	roo	Last exon	2.18422	1
Gut	TOM-007	FBtr0310020	TRINITY_DN4700_c2_g1_i4	FBtr0310020	FBgn0261509	roo	Last exon	1.20495	1
Gut	TOM-007	FBtr0310277	TRINITY_DN867_c8_g1_i2	FBtr0310277	FBgn0262160	roo	Middle exon	23.7827	1
Gut	TOM-007	FBtr0310443	TRINITY_DN2280_c1_g1_i2	FBtr0310443	FBgn0026878	roo	Last exon	22.2961	0.655908
Gut	TOM-007	FBtr0310448	TRINITY_DN381_c1_g1_i4	MSTRG.2996.3	FBgn0033313	roo	Middle exon	16.1371	1
Gut	TOM-007	FBtr0310448	TRINITY_DN381_c1_g1_i8	MSTRG.2996.1	FBgn0033313	roo	Middle exon	14.1363	1
Gut	TOM-007	FBtr0329829	TRINITY_DN761_c3_g1_i1	FBtr0329829	FBgn0250830	1360	Last exon	70.0032	0.999994
Gut	TOM-007	FBtr0329963	TRINITY_DN27157_c0_g2_i1	FBtr0329963	FBgn0032796	roo	First exon	24.1289	1
Gut	TOM-007	FBtr0330085	TRINITY_DN954_c0_g2_i2	FBtr0085220	FBgn0045862	roo	Last exon	59.374	1
Gut	TOM-007	FBtr0330382	TRINITY_DN2282_c4_g1_i1	FBtr0330382	FBgn0039169	roo	Unique	23.98	1
Gut	TOM-007	FBtr0330732	TRINITY_DN3687_c0_g1_i9	FBtr0330732	FBgn0264089	Idefix	Last exon	6.6852	1
Gut	TOM-007	FBtr0330734	TRINITY_DN3687_c0_g1_i3	FBtr0330731	FBgn0264089	Idefix	Last exon	3.196	1
Gut	TOM-007	FBtr0330734	TRINITY_DN3687_c0_g1_i8	MSTRG.3945.2	FBgn0264089	Idefix	Last exon	6.88354	1
Gut	TOM-007	FBtr0331378	TRINITY_DN1669_c0_g1_i13	FBtr0081507	FBgn0032910	INE-1	Last exon	78.5556	0.99886
Gut	TOM-007	FBtr0331657	TRINITY_DN3684_c0_g1_i5	FBtr0331656	FBgn0032974	INE-1	Last exon	29.6608	0.999993
Gut	TOM-007	FBtr0331744	TRINITY_DN1007_c0_g1_i9	FBtr0331744	FBgn0024251	roo	Middle exon	0.788163	0.999999
Gut	TOM-007	FBtr0331745	TRINITY_DN1007_c0_g1_i6	FBtr0331745	FBgn0024251	roo	Middle exon	0.758836	0.999999
Gut	TOM-007	FBtr0331780	TRINITY_DN4048_c0_g1_i3	FBtr0331780	FBgn0024804	gypsy10	Last exon	4.53578	0.923296
Gut	TOM-007	FBtr0331840	TRINITY_DN203_c0_g2_i1	FBtr0331840	FBgn0035798	roo	Last exon	41.3065	1
Gut	TOM-007	FBtr0331925	TRINITY_DN508_c0_g1_i7	FBtr0331925	FBgn0086358	roo	Middle exon	8.5853	1
Gut	TOM-007	FBtr0332232	TRINITY_DN1570_c1_g1_i20	FBtr0332232	FBgn0262475	roo	Middle exon	9.76466	0.999997
Gut	TOM-007	FBtr0332233	TRINITY_DN1570_c1_g1_i23	FBtr0332233	FBgn0262475	roo	Middle exon	16.2525	1
Gut	TOM-007	FBtr0332392	TRINITY_DN4094_c0_g1_i2	FBtr0332392	FBgn0031001	roo	First exon	1.81729	1
Gut	TOM-007	FBtr0332578	TRINITY_DN13086_c0_g1_i1	FBtr0332578	FBgn0086443	gypsy8	Last exon	71.132	0.999987
Gut	TOM-007	FBtr0332656	TRINITY_DN1914_c0_g4_i2	FBtr0332656	FBgn0043458	1360	Last exon	61.7998	1
Gut	TOM-007	FBtr0333042	TRINITY_DN3828_c0_g1_i1	FBtr0333042	FBgn0003459	Stalker4	Last exon	29.2995	1
Gut	TOM-007	FBtr0333189	TRINITY_DN237_c2_g1_i1	FBtr0333189	FBgn0058198	INE-1	Last exon	42.5652	0.360492
Gut	TOM-007	FBtr0333218	TRINITY_DN731_c0_g1_i2	FBtr0072464	FBgn0020386	roo	Middle exon	45.5612	0.999999
Gut	TOM-007	FBtr0333388	TRINITY_DN73_c0_g1_i1	FBtr0076183	FBgn0036152	roo	First exon	27.0868	0.99994
Gut	TOM-007	FBtr0333388	TRINITY_DN73_c0_g1_i1	FBtr0076183	FBgn0036152	roo	Last exon	27.0868	0.99994
Gut	TOM-007	FBtr0333745	TRINITY_DN1589_c0_g1_i5	FBtr0333745	FBgn0261802	INE-1	Last exon	3.00245	1
Gut	TOM-007	FBtr0333745	TRINITY_DN1589_c0_g1_i5	FBtr0333745	FBgn0261802	gypsy6	First exon	3.00245	1
Gut	TOM-007	FBtr0333873	TRINITY_DN711_c1_g2_i2	FBtr0333873	FBgn0260008	FB4	Last exon	42.8881	0.0338551
Gut	TOM-007	FBtr0333873	TRINITY_DN711_c1_g2_i2	FBtr0333873	FBgn0260008	Tc1-2	Last exon	42.8881	0.0338551
Gut	TOM-007	FBtr0334112	TRINITY_DN9646_c0_g1_i1	FBtr0334112	FBgn0264727	INE-1	Unique	74.9067	0.001397
Gut	TOM-007	FBtr0334672	TRINITY_DN986_c1_g1_i13	FBtr0334672	FBgn0261238	roo	Middle exon	3.05521	1
Gut	TOM-007	FBtr0334747	TRINITY_DN462_c0_g1_i5	FBtr0334747	FBgn0004179	roo	Middle exon	26.5122	0.695024
Gut	TOM-007	FBtr0334847	TRINITY_DN986_c2_g1_i2	FBtr0334847	FBgn0264895	roo	First exon	14.2911	0.999999
Gut	TOM-007	FBtr0334934	TRINITY_DN1119_c0_g3_i1	FBtr0334934	FBgn0287182	jockey2	Last exon	19.5197	0.0196087
Gut	TOM-007	FBtr0335016	TRINITY_DN1669_c2_g1_i1	FBtr0335016	FBgn0038840	INE-1	Last exon	10.916	1
Gut	TOM-007	FBtr0335138	TRINITY_DN1669_c0_g3_i1	FBtr0080883	FBgn0001185	INE-1	Last exon	64.649	0.999821
Gut	TOM-007	FBtr0335266	TRINITY_DN1133_c0_g1_i11	FBtr0335266	FBgn0033047	INE-1	Last exon	2.74092	0.976345
Gut	TOM-007	FBtr0335266	TRINITY_DN1133_c0_g1_i11	FBtr0335266	FBgn0033047	Idefix	First exon	2.74092	0.976345
Gut	TOM-007	FBtr0335269	TRINITY_DN16274_c0_g1_i1	FBtr0086043	FBgn0022288	Tc3	Unique	68.1663	0.999673
Gut	TOM-007	FBtr0335285	TRINITY_DN2866_c0_g1_i5	FBtr0085972	FBgn0033050	INE-1	Middle exon	3.75194	0.999536
Gut	TOM-007	FBtr0335289	TRINITY_DN2866_c0_g1_i6	FBtr0335289	FBgn0033051	INE-1	Middle exon	5.61228	0.996613
Gut	TOM-007	FBtr0335414	TRINITY_DN8810_c0_g1_i1	FBtr0335414	FBgn0039804	roo	Middle exon	10.574	1
Gut	TOM-007	FBtr0335427	TRINITY_DN3400_c0_g1_i1	FBtr0083220	FBgn0003117	roo	Last exon	4.90656	0.99931
Gut	TOM-007	FBtr0336467	TRINITY_DN114_c0_g1_i10	MSTRG.9499.1	FBgn0042693	roo	Middle exon	24.4031	0.999994
Gut	TOM-007	FBtr0336467	TRINITY_DN114_c0_g1_i15	MSTRG.9499.3	FBgn0042693	roo	Middle exon	3.64317	0.999991
Gut	TOM-007	FBtr0336480	TRINITY_DN7233_c0_g1_i1	FBtr0336480	FBgn0037228	INE-1	Middle exon	27.516	0.999091
Gut	TOM-007	FBtr0336480	TRINITY_DN7233_c0_g1_i2	FBtr0336481	FBgn0037228	INE-1	First exon	1.54091	0.993842
Gut	TOM-007	FBtr0336617	TRINITY_DN867_c8_g1_i1	MSTRG.1539.2	FBgn0262160	roo	Middle exon	5.18217	1
Gut	TOM-007	FBtr0336925	TRINITY_DN3644_c0_g1_i1	FBtr0336925	FBgn0033185	1360	Last exon	30.8543	0.99998
Gut	TOM-007	FBtr0336925	TRINITY_DN3644_c0_g1_i1	FBtr0336925	FBgn0033185	Stalker4	Last exon	30.8543	0.99998
Gut	TOM-007	FBtr0336935	TRINITY_DN2161_c0_g2_i3	MSTRG.3157.1	FBgn0033443	INE-1	First exon	4.67689	0.999999
Gut	TOM-007	FBtr0339164	TRINITY_DN3433_c0_g1_i1	FBtr0084340	FBgn0039031	Doc6	Unique	30.3701	0.609985
Gut	TOM-007	FBtr0339549	TRINITY_DN357_c0_g1_i4	MSTRG.412.1	FBgn0020445	roo	Middle exon	1.37723	0.999999
Gut	TOM-007	FBtr0339894	TRINITY_DN3389_c0_g1_i2	FBtr0339894	FBgn0010215	INE-1	Middle exon	3.54927	0.998742
Gut	TOM-007	FBtr0340020	TRINITY_DN458_c1_g2_i1	FBtr0340020	FBgn0034071	roo	Middle exon	6.22416	1
Gut	TOM-007	FBtr0340073	TRINITY_DN1130_c0_g1_i8	MSTRG.4107.1	FBgn0034180	P-element	First exon	48.7784	1
Gut	TOM-007	FBtr0340488	TRINITY_DN966_c0_g1_i13	FBtr0340488	FBgn0265630	roo	Middle exon	17.0592	1
Gut	TOM-007	FBtr0343556	TRINITY_DN394_c1_g1_i2	FBtr0343556	FBgn0266101	roo	Last exon	36.5681	0.999993
Gut	TOM-007	FBtr0343825	TRINITY_DN3163_c0_g1_i3	FBtr0343825	FBgn0032688	roo	Last exon	3.85639	1
Gut	TOM-007	FBtr0344464	TRINITY_DN713_c1_g1_i19	FBtr0344464	FBgn0266457	3S18	Last exon	4.52345	0.141982
Gut	TOM-007	FBtr0344755	TRINITY_DN2156_c1_g3_i1	MSTRG.2535.1	FBgn0267398	NOF	Last exon	39.476	0.747994
Gut	TOM-007	FBtr0344983	TRINITY_DN462_c0_g1_i7	FBtr0344983	FBgn0004179	roo	Middle exon	29.8389	0.866393
Gut	TOM-007	FBtr0345008	TRINITY_DN2915_c0_g1_i9	FBtr0345008	FBgn0039994	INE-1	First exon	8.69085	0.993403
Gut	TOM-007	FBtr0345009	TRINITY_DN2278_c0_g1_i1	MSTRG.2604.1	FBgn0033005	INE-1	First exon	5.75827	1
Gut	TOM-007	FBtr0345028	TRINITY_DN4510_c0_g1_i2	MSTRG.5619.2	FBgn0035388	roo	Middle exon	72.0021	0.999879
Gut	TOM-007	FBtr0345092	TRINITY_DN2085_c0_g1_i8	FBtr0345092	FBgn0266696	roo	Middle exon	6.39963	1
Gut	TOM-007	FBtr0345138	TRINITY_DN1917_c0_g2_i6	FBtr0345138	FBgn0264492	1360	Last exon	1.35957	0.934117
Gut	TOM-007	FBtr0345138	TRINITY_DN1917_c0_g2_i6	FBtr0345138	FBgn0264492	hopper2	Last exon	1.35957	0.934117
Gut	TOM-007	FBtr0345153	TRINITY_DN1617_c5_g1_i1	FBtr0345153	FBgn0266697	INE-1	Last exon	4.23422	0.0197433
Gut	TOM-007	FBtr0345161	TRINITY_DN2504_c0_g2_i2	FBtr0345161	FBgn0040309	transib1	Unique	24.004	0.987164
Gut	TOM-007	FBtr0345384	TRINITY_DN1139_c0_g1_i4	FBtr0345384	FBgn0036746	roo	Last exon	23.0978	0.999996
Gut	TOM-007	FBtr0345418	TRINITY_DN2461_c0_g1_i3	FBtr0086921	FBgn0028953	roo	Last exon	67.9873	0.99917
Gut	TOM-007	FBtr0345418	TRINITY_DN2461_c0_g1_i4	MSTRG.4176.1	FBgn0028953	roo	Last exon	9.03555	0.999173
Gut	TOM-007	FBtr0345517	TRINITY_DN669_c0_g1_i1	FBtr0086985	FBgn0034198	Copia	Unique	65.9692	0.825527
Gut	TOM-007	FBtr0345638	TRINITY_DN867_c12_g1_i1	FBtr0079429	FBgn0051908	roo	Last exon	81.0154	0.999177
Gut	TOM-007	FBtr0345644	TRINITY_DN8182_c0_g1_i19	FBtr0345644	FBgn0085415	roo	Middle exon	55.1175	0.999801
Gut	TOM-007	FBtr0345665	TRINITY_DN1133_c0_g1_i21	FBtr0345665	FBgn0033048	INE-1	Middle exon	11.6106	0.971455
Gut	TOM-007	FBtr0345714	TRINITY_DN11396_c0_g2_i1	FBtr0345714	FBgn0019661	BS2	First exon	40.5194	0.00482001
Gut	TOM-007	FBtr0345714	TRINITY_DN11396_c0_g2_i1	FBtr0345714	FBgn0019661	LARD	First exon	40.5194	0.00482001
Gut	TOM-007	FBtr0345714	TRINITY_DN11396_c0_g2_i1	FBtr0345714	FBgn0019661	LARD	Last exon	40.5194	0.00482001
Gut	TOM-007	FBtr0346555	TRINITY_DN7448_c0_g1_i1	FBtr0346555	FBgn0267300	Rt1b	Last exon	2.2801	0.0295958
Gut	TOM-007	FBtr0346680	TRINITY_DN97_c0_g1_i9	FBtr0346680	FBgn0266632	INE-1	First exon	22.4267	0.0117724
Gut	TOM-007	FBtr0346680	TRINITY_DN97_c0_g1_i9	FBtr0346680	FBgn0266632	S-element	First exon	22.4267	0.0117724
Gut	TOM-007	FBtr0346680	TRINITY_DN97_c0_g1_i9	FBtr0346680	FBgn0266632	gypsy	Last exon	22.4267	0.0117724
Gut	TOM-007	FBtr0346819	TRINITY_DN2020_c0_g1_i3	FBtr0346819	FBgn0037098	roo	Middle exon	3.30309	1
Gut	TOM-007	FBtr0347247	TRINITY_DN25480_c0_g1_i1	FBtr0347247	FBgn0267708	Burdock	Unique	4.80711	0.120301
Gut	TOM-007	FBtr0347540	TRINITY_DN2020_c0_g1_i1	FBtr0346817	FBgn0037098	roo	Middle exon	40.4565	1
Gut	TOM-007	FBtr0415455	TRINITY_DN1381_c0_g1_i1	FBtr0415455	FBgn0278598	INE-1	Last exon	9.57049	0.0389406
Gut	TOM-007	FBtr0415458	TRINITY_DN1381_c0_g1_i6	FBtr0415458	FBgn0278598	INE-1	Last exon	18.2806	0.985731
Gut	TOM-007	FBtr0473377	TRINITY_DN11366_c0_g1_i4	FBtr0473377	FBgn0286030	Rt1a	Unique	13.9958	0.0448157
Gut	TOM-007	FBtr0474154	TRINITY_DN4700_c2_g1_i7	FBtr0474153	FBgn0261509	roo	Last exon	2.74146	1
Gut	TOM-007	FBtr0475062	TRINITY_DN14172_c0_g1_i1	FBtr0475062	FBgn0286884	INE-1	Unique	2.7626	0.0483075
Gut	TOM-007	FBtr0475316	TRINITY_DN16103_c0_g1_i1	FBtr0475316	FBgn0260721	INE-1	Unique	3.06253	0.210204
Head	AKA-017	FBtr0070003	TRINITY_DN6337_c0_g1_i1	FBtr0070003	FBgn0062565	INE-1	Last exon	3.62689	0.999575
Head	AKA-017	FBtr0070046	TRINITY_DN1818_c0_g1_i1	FBtr0070046	FBgn0052350	1360	Unique	18.1798	0.999997
Head	AKA-017	FBtr0070974	TRINITY_DN1160_c2_g1_i6	FBtr0070974	FBgn0029905	roo	Middle exon	12.9817	0.999973
Head	AKA-017	FBtr0070988	TRINITY_DN1471_c0_g1_i2	FBtr0070988	FBgn0029893	roo	First exon	53.7468	1
Head	AKA-017	FBtr0070989	TRINITY_DN1310_c18_g1_i1	FBtr0070989	FBgn0029892	INE-1	Last exon	46.1318	0.996832
Head	AKA-017	FBtr0071001	TRINITY_DN7978_c0_g1_i1	FBtr0071001	FBgn0052733	G5A	Unique	2.05391	0.696204
Head	AKA-017	FBtr0071342	TRINITY_DN1823_c2_g1_i1	FBtr0071342	FBgn0030096	INE-1	Last exon	59.6922	0.99995
Head	AKA-017	FBtr0071389	TRINITY_DN1251_c0_g1_i1	FBtr0071389	FBgn0030158	LARD	First exon	53.7954	0.961807
Head	AKA-017	FBtr0071389	TRINITY_DN1251_c0_g1_i1	FBtr0071389	FBgn0030158	LARD	Last exon	53.7954	0.961807
Head	AKA-017	FBtr0071556	TRINITY_DN1839_c3_g1_i1	FBtr0071556	FBgn0008636	roo	Middle exon	24.1816	0.999624
Head	AKA-017	FBtr0071903	TRINITY_DN5609_c0_g1_i6	MSTRG.4919.2	FBgn0034795	roo	Middle exon	19.4407	1
Head	AKA-017	FBtr0072261	TRINITY_DN22981_c0_g1_i1	FBtr0072261	FBgn0034988	INE-1	Unique	48.0928	0.997306
Head	AKA-017	FBtr0072457	TRINITY_DN1599_c1_g1_i11	FBtr0072457	FBgn0266129	Burdock	Last exon	20.0853	1
Head	AKA-017	FBtr0072578	TRINITY_DN1471_c2_g1_i5	FBtr0072578	FBgn0000575	roo	Middle exon	5.98861	0.897184
Head	AKA-017	FBtr0072711	TRINITY_DN2158_c0_g1_i3	FBtr0072711	FBgn0043458	1360	Last exon	8.95186	1
Head	AKA-017	FBtr0073145	TRINITY_DN5743_c0_g1_i2	FBtr0073145	FBgn0014388	roo	Last exon	14.4469	0.999706
Head	AKA-017	FBtr0073163	TRINITY_DN1734_c1_g1_i1	FBtr0073163	FBgn0035477	roo	First exon	3.78803	0.999997
Head	AKA-017	FBtr0073306	TRINITY_DN223_c0_g1_i4	FBtr0073306	FBgn0035551	NewFam16	Middle exon	19.8079	0.999107
Head	AKA-017	FBtr0073306	TRINITY_DN223_c0_g1_i4	FBtr0073306	FBgn0035551	NewFam16	Last exon	19.8079	0.999107
Head	AKA-017	FBtr0073387	TRINITY_DN1425_c2_g1_i2	FBtr0343591	FBgn0030251	roo	First exon	2.8013	0.999759
Head	AKA-017	FBtr0073387	TRINITY_DN1425_c2_g1_i3	FBtr0073387	FBgn0030251	roo	First exon	53.3322	0.999986
Head	AKA-017	FBtr0073798	TRINITY_DN5386_c0_g1_i4	FBtr0073798	FBgn0041210	roo	Middle exon	5.90245	1
Head	AKA-017	FBtr0074174	TRINITY_DN285_c1_g1_i1	MSTRG.12534.1	FBgn0026076	roo	First exon	36.9166	0.962979
Head	AKA-017	FBtr0074634	TRINITY_DN202_c1_g1_i9	FBtr0074634	FBgn0283473	roo	First exon	21.4395	0.999821
Head	AKA-017	FBtr0074696	TRINITY_DN18151_c0_g1_i1	FBtr0074696	FBgn0030995	INE-1	Unique	18.4309	0.998394
Head	AKA-017	FBtr0074719	TRINITY_DN3999_c1_g1_i1	FBtr0074719	FBgn0027621	FB4	First exon	5.61878	0.999812
Head	AKA-017	FBtr0074719	TRINITY_DN3999_c1_g1_i1	FBtr0074719	FBgn0027621	NOF	First exon	5.61878	0.999812
Head	AKA-017	FBtr0074747	TRINITY_DN848_c1_g1_i1	FBtr0344152	FBgn0031054	G5A	Last exon	59.3165	0.933708
Head	AKA-017	FBtr0075159	TRINITY_DN1601_c0_g1_i9	FBtr0075159	FBgn0036764	hopper2	Middle exon	0.950487	0.999985
Head	AKA-017	FBtr0075163	TRINITY_DN209_c1_g2_i2	FBtr0075163	FBgn0052189	INE-1	Unique	10.0978	0.360853
Head	AKA-017	FBtr0075171	TRINITY_DN3330_c0_g1_i3	FBtr0075171	FBgn0052190	roo	Last exon	60.37	0.999995
Head	AKA-017	FBtr0075330	TRINITY_DN3210_c0_g1_i3	FBtr0075330	FBgn0036668	roo	Last exon	30.1119	1
Head	AKA-017	FBtr0075538	TRINITY_DN3290_c0_g3_i2	FBtr0075538	FBgn0036534	roo	Last exon	60.0811	1
Head	AKA-017	FBtr0075580	TRINITY_DN2488_c1_g1_i1	FBtr0075580	FBgn0041160	roo	Last exon	66.6241	0.995488
Head	AKA-017	FBtr0075855	TRINITY_DN2696_c0_g1_i1	FBtr0075855	FBgn0036360	roo	Middle exon	31.3263	0.999158
Head	AKA-017	FBtr0076078	TRINITY_DN10_c0_g1_i13	MSTRG.6652.2	FBgn0036211	Gypsy-2_Dsim	First exon	1.56022	0.354779
Head	AKA-017	FBtr0076368	TRINITY_DN86_c0_g3_i1	FBtr0076368	FBgn0004390	roo	Last exon	38.3113	1
Head	AKA-017	FBtr0076369	TRINITY_DN4171_c0_g2_i1	FBtr0076369	FBgn0015618	roo	Last exon	10.521	0.999983
Head	AKA-017	FBtr0076943	TRINITY_DN491_c1_g2_i7	FBtr0076943	FBgn0035714	roo	First exon	9.5929	0.962156
Head	AKA-017	FBtr0077267	TRINITY_DN197_c1_g1_i3	MSTRG.13048.4	FBgn0031144	Tc3	Last exon	4.57213	0.999705
Head	AKA-017	FBtr0077571	TRINITY_DN252_c2_g3_i4	FBtr0077571	FBgn0005616	INE-1	Last exon	31.672	1
Head	AKA-017	FBtr0077765	TRINITY_DN1118_c0_g1_i2	FBtr0331438	FBgn0031420	roo	Last exon	40.4194	1
Head	AKA-017	FBtr0078061	TRINITY_DN6874_c0_g1_i1	FBtr0078061	FBgn0031257	roo	Last exon	27.6729	0.999996
Head	AKA-017	FBtr0078144	TRINITY_DN1257_c3_g1_i7	FBtr0078144	FBgn0266557	roo	First exon	13.8472	1
Head	AKA-017	FBtr0078154	TRINITY_DN824_c1_g1_i38	FBtr0078154	FBgn0025683	Quasimodo2	Middle exon	3.77614	0.999998
Head	AKA-017	FBtr0078160	TRINITY_DN209_c1_g4_i1	FBtr0336838	FBgn0031219	INE-1	Unique	12.4548	0.521416
Head	AKA-017	FBtr0078170	TRINITY_DN1318_c2_g1_i6	FBtr0078170	FBgn0002121	INE-1	Last exon	30.7567	1
Head	AKA-017	FBtr0078243	TRINITY_DN4418_c0_g1_i1	FBtr0078243	FBgn0037014	roo	Middle exon	12.259	1
Head	AKA-017	FBtr0078454	TRINITY_DN4610_c0_g1_i1	FBtr0078454	FBgn0037126	INE-1	Unique	30.7551	0.632332
Head	AKA-017	FBtr0078486	TRINITY_DN1143_c0_g1_i3	FBtr0078486	FBgn0027532	INE-1	First exon	23.1484	1
Head	AKA-017	FBtr0078495	TRINITY_DN2882_c1_g1_i8	FBtr0078495	FBgn0004179	roo	Middle exon	15.6166	0.798608
Head	AKA-017	FBtr0078560	TRINITY_DN1130_c0_g1_i9	FBtr0078560	FBgn0037206	roo	Middle exon	28.6441	0.999523
Head	AKA-017	FBtr0078926	TRINITY_DN501_c5_g2_i6	FBtr0078926	FBgn0037252	roo	Last exon	50.7306	1
Head	AKA-017	FBtr0078928	TRINITY_DN18219_c0_g1_i1	FBtr0078928	FBgn0037255	Tc1-2	Last exon	44.8919	0.999999
Head	AKA-017	FBtr0078961	TRINITY_DN198_c3_g6_i2	MSTRG.7940.3	FBgn0037213	INE-1	Last exon	50.961	0.999929
Head	AKA-017	FBtr0078991	TRINITY_DN2452_c0_g1_i2	FBtr0078991	FBgn0015000	INE-1	Last exon	7.52547	0.988831
Head	AKA-017	FBtr0079177	TRINITY_DN128_c1_g2_i2	FBtr0079177	FBgn0001942	blood	Last exon	31.4119	0.999749
Head	AKA-017	FBtr0079356	TRINITY_DN1114_c0_g1_i1	FBtr0346716	FBgn0264922	mdg1	First exon	75.6527	0.874485
Head	AKA-017	FBtr0080113	TRINITY_DN3159_c0_g1_i1	FBtr0080113	FBgn0032295	roo	Last exon	31.4837	1
Head	AKA-017	FBtr0080187	TRINITY_DN1335_c0_g2_i1	FBtr0080187	FBgn0032305	roo	First exon	62.3138	0.999984
Head	AKA-017	FBtr0080188	TRINITY_DN1918_c0_g1_i4	FBtr0080188	FBgn0011676	roo	Middle exon	12.6448	1
Head	AKA-017	FBtr0080200	TRINITY_DN2805_c0_g1_i1	FBtr0080200	FBgn0032348	roo	Last exon	39.5528	1
Head	AKA-017	FBtr0080252	TRINITY_DN1515_c0_g1_i1	FBtr0080252	FBgn0015400	roo	Last exon	17.0075	0.999999
Head	AKA-017	FBtr0081156	TRINITY_DN3712_c0_g1_i1	FBtr0081156	FBgn0086445	gypsy8	Last exon	35.1686	0.999848
Head	AKA-017	FBtr0081350	TRINITY_DN5700_c0_g2_i1	MSTRG.2162.1	FBgn0032839	INE-1	Unique	5.31243	0.844874
Head	AKA-017	FBtr0081517	TRINITY_DN1310_c8_g1_i1	FBtr0081517	FBgn0032945	INE-1	Middle exon	57.6432	1
Head	AKA-017	FBtr0082116	TRINITY_DN32_c1_g1_i5	FBtr0082116	FBgn0037705	roo	First exon	7.42202	0.999941
Head	AKA-017	FBtr0082117	TRINITY_DN32_c1_g1_i12	MSTRG.8544.1	FBgn0037705	roo	First exon	39.178	1
Head	AKA-017	FBtr0082396	TRINITY_DN2581_c0_g1_i5	FBtr0082396	FBgn0037906	roo	First exon	5.44723	0.983963
Head	AKA-017	FBtr0083026	TRINITY_DN2135_c0_g2_i9	FBtr0083026	FBgn0038292	Tc1-2	First exon	7.26316	0.995937
Head	AKA-017	FBtr0083026	TRINITY_DN2135_c0_g2_i9	FBtr0083026	FBgn0038292	gypsy7	First exon	7.26316	0.995937
Head	AKA-017	FBtr0083731	TRINITY_DN2615_c0_g2_i11	FBtr0083731	FBgn0038681	Bari1	Last exon	12.4894	0.99979
Head	AKA-017	FBtr0083735	TRINITY_DN1524_c0_g1_i1	FBtr0083735	FBgn0051475	roo	Middle exon	2.47787	0.99892
Head	AKA-017	FBtr0083993	TRINITY_DN1687_c4_g3_i1	MSTRG.9758.1	FBgn0038829	roo	Middle exon	8.81152	0.994537
Head	AKA-017	FBtr0083998	TRINITY_DN1006_c0_g1_i71	FBtr0083998	FBgn0013995	roo	Middle exon	7.23285	1
Head	AKA-017	FBtr0084675	TRINITY_DN6015_c0_g1_i4	FBtr0084675	FBgn0039209	roo	Middle exon	1.98235	0.999996
Head	AKA-017	FBtr0084898	TRINITY_DN51_c3_g1_i1	FBtr0084898	FBgn0261986	roo	Middle exon	55.9118	0.999978
Head	AKA-017	FBtr0085437	TRINITY_DN2844_c0_g1_i55	MSTRG.10731.2	FBgn0015622	LARD	First exon	7.37756	0.999985
Head	AKA-017	FBtr0085718	TRINITY_DN1901_c1_g1_i2	FBtr0085718	FBgn0039807	roo	Unique	36.9519	0.99829
Head	AKA-017	FBtr0085903	TRINITY_DN1823_c0_g1_i4	FBtr0085903	FBgn0032961	Gypsy-1_Dsim	Last exon	9.20204	0.994568
Head	AKA-017	FBtr0085903	TRINITY_DN1823_c0_g1_i4	FBtr0085903	FBgn0032961	INE-1	Last exon	9.20204	0.994568
Head	AKA-017	FBtr0086080	TRINITY_DN5806_c0_g1_i7	FBtr0086080	FBgn0033010	BS2	First exon	12.7738	0.999948
Head	AKA-017	FBtr0086080	TRINITY_DN5806_c0_g1_i7	FBtr0086080	FBgn0033010	BS2	Middle exon	12.7738	0.999948
Head	AKA-017	FBtr0086080	TRINITY_DN5806_c0_g1_i7	FBtr0086080	FBgn0033010	BS3	Middle exon	12.7738	0.999948
Head	AKA-017	FBtr0086080	TRINITY_DN5806_c0_g1_i7	FBtr0086080	FBgn0033010	INE-1	Last exon	12.7738	0.999948
Head	AKA-017	FBtr0086080	TRINITY_DN5806_c0_g1_i7	FBtr0086080	FBgn0033010	INE-1	Middle exon	12.7738	0.999948
Head	AKA-017	FBtr0086081	TRINITY_DN5806_c0_g1_i5	FBtr0086081	FBgn0033010	INE-1	Last exon	17.3651	0.999988
Head	AKA-017	FBtr0086091	TRINITY_DN2963_c0_g1_i3	FBtr0086091	FBgn0033021	INE-1	Last exon	42.5328	0.999978
Head	AKA-017	FBtr0086238	TRINITY_DN5381_c0_g1_i3	FBtr0344877	FBgn0040726	roo	Last exon	42.9356	0.980219
Head	AKA-017	FBtr0086462	TRINITY_DN804_c0_g1_i1	FBtr0086462	FBgn0026378	roo	Last exon	51.4922	0.999529
Head	AKA-017	FBtr0087180	TRINITY_DN1606_c0_g1_i2	FBtr0087181	FBgn0050099	INE-1	Unique	5.88604	0.558866
Head	AKA-017	FBtr0087242	TRINITY_DN6485_c0_g1_i1	FBtr0087242	FBgn0034087	INE-1	Last exon	55.8807	1
Head	AKA-017	FBtr0087315	TRINITY_DN137_c0_g1_i25	MSTRG.3937.2	FBgn0265991	roo	Middle exon	10.3438	1
Head	AKA-017	FBtr0087369	TRINITY_DN212_c0_g1_i2	FBtr0087369	FBgn0286785	INE-1	Last exon	7.29603	1
Head	AKA-017	FBtr0087528	TRINITY_DN1398_c0_g1_i64	FBtr0087528	FBgn0000289	roo	Middle exon	2.11025	0.999834
Head	AKA-017	FBtr0087528	TRINITY_DN1398_c0_g1_i64	FBtr0087528	FBgn0000289	roo	Last exon	2.11025	0.999834
Head	AKA-017	FBtr0088074	TRINITY_DN731_c1_g1_i3	FBtr0088074	FBgn0050035	INE-1	First exon	10.3162	0.999585
Head	AKA-017	FBtr0088100	TRINITY_DN1481_c2_g1_i1	FBtr0088100	FBgn0003396	roo	First exon	46.1344	1
Head	AKA-017	FBtr0088100	TRINITY_DN1481_c2_g1_i1	FBtr0088100	FBgn0003396	roo	Middle exon	46.1344	1
Head	AKA-017	FBtr0088381	TRINITY_DN3482_c0_g1_i12	FBtr0088381	FBgn0285892	INE-1	Middle exon	1.62643	1
Head	AKA-017	FBtr0088487	TRINITY_DN899_c1_g2_i1	FBtr0088487	FBgn0033448	roo	First exon	18.899	0.999926
Head	AKA-017	FBtr0089052	TRINITY_DN47_c16_g1_i1	FBtr0089052	FBgn0002930	roo	Middle exon	60.4129	0.999976
Head	AKA-017	FBtr0089361	TRINITY_DN396_c0_g1_i35	FBtr0089361	FBgn0283521	roo	Last exon	11.4593	0.999826
Head	AKA-017	FBtr0089364	TRINITY_DN396_c0_g1_i30	FBtr0089364	FBgn0283521	roo	Middle exon	5.08687	0.999998
Head	AKA-017	FBtr0089478	TRINITY_DN5727_c0_g1_i32	FBtr0089478	FBgn0036640	TART-A	Middle exon	6.83452	1
Head	AKA-017	FBtr0089478	TRINITY_DN5727_c0_g1_i32	FBtr0089478	FBgn0036640	TART-A	Last exon	6.83452	1
Head	AKA-017	FBtr0089678	TRINITY_DN1839_c0_g1_i2	FBtr0089678	FBgn0003464	roo	Middle exon	29.9331	1
Head	AKA-017	FBtr0100154	TRINITY_DN33_c0_g3_i1	FBtr0100154	FBgn0261823	roo	Middle exon	12.9329	1
Head	AKA-017	FBtr0100407	TRINITY_DN1813_c0_g1_i13	FBtr0100407	FBgn0032979	INE-1	Last exon	18.63	0.997803
Head	AKA-017	FBtr0100511	TRINITY_DN4896_c0_g1_i10	FBtr0100511	FBgn0032955	INE-1	Last exon	30.111	0.893578
Head	AKA-017	FBtr0100538	TRINITY_DN6727_c0_g1_i3	MSTRG.13126.2	FBgn0000719	gypsy12	Last exon	26.3292	0.999937
Head	AKA-017	FBtr0100609	TRINITY_DN3224_c0_g1_i1	FBtr0100609	FBgn0031159	roo	First exon	4.15701	0.999434
Head	AKA-017	FBtr0100650	TRINITY_DN5557_c0_g1_i8	FBtr0100650	FBgn0031191	INE-1	Last exon	10.6084	0.999751
Head	AKA-017	FBtr0100651	TRINITY_DN5557_c0_g1_i1	FBtr0100651	FBgn0031191	INE-1	Last exon	7.86098	0.999994
Head	AKA-017	FBtr0110796	TRINITY_DN6015_c0_g1_i6	FBtr0110796	FBgn0039209	roo	Middle exon	4.80845	1
Head	AKA-017	FBtr0110959	TRINITY_DN865_c0_g1_i11	FBtr0110959	FBgn0051619	INE-1	Middle exon	14.1684	1
Head	AKA-017	FBtr0110959	TRINITY_DN865_c0_g1_i11	FBtr0110959	FBgn0051619	INE-1	Last exon	14.1684	1
Head	AKA-017	FBtr0111111	TRINITY_DN4870_c0_g1_i1	FBtr0308810	FBgn0046692	Gypsy-1_Dsim	Last exon	12.0727	0.0392363
Head	AKA-017	FBtr0111111	TRINITY_DN4870_c0_g1_i1	FBtr0308810	FBgn0046692	Gypsy-6_Dse	Last exon	12.0727	0.0392363
Head	AKA-017	FBtr0111111	TRINITY_DN4870_c0_g1_i4	MSTRG.2585.1	FBgn0046692	Gypsy-1_Dsim	Last exon	3.0547	0.113467
Head	AKA-017	FBtr0111111	TRINITY_DN4870_c0_g1_i4	MSTRG.2585.1	FBgn0046692	Gypsy-6_Dse	Last exon	3.0547	0.113467
Head	AKA-017	FBtr0111298	TRINITY_DN1016_c0_g1_i1	FBtr0111298	FBgn0262115	INE-1	Last exon	28.5496	0.997075
Head	AKA-017	FBtr0111298	TRINITY_DN1016_c0_g1_i1	FBtr0111298	FBgn0262115	gypsy2	Last exon	28.5496	0.997075
Head	AKA-017	FBtr0111299	TRINITY_DN1016_c0_g1_i8	MSTRG.2577.1	FBgn0262115	INE-1	Last exon	3.50958	0.616095
Head	AKA-017	FBtr0111299	TRINITY_DN1016_c0_g1_i8	MSTRG.2577.1	FBgn0262115	gypsy2	Last exon	3.50958	0.616095
Head	AKA-017	FBtr0111300	TRINITY_DN1016_c0_g1_i3	FBtr0111300	FBgn0262115	INE-1	Last exon	10.3184	0.987628
Head	AKA-017	FBtr0111300	TRINITY_DN1016_c0_g1_i3	FBtr0111300	FBgn0262115	gypsy2	Last exon	10.3184	0.987628
Head	AKA-017	FBtr0112795	TRINITY_DN1398_c0_g1_i53	MSTRG.3746.1	FBgn0000289	roo	Middle exon	3.66678	0.999993
Head	AKA-017	FBtr0112795	TRINITY_DN1398_c0_g1_i53	MSTRG.3746.1	FBgn0000289	roo	Last exon	3.66678	0.999993
Head	AKA-017	FBtr0112795	TRINITY_DN1398_c0_g1_i7	MSTRG.3746.5	FBgn0000289	roo	Middle exon	11.9573	0.999959
Head	AKA-017	FBtr0112795	TRINITY_DN1398_c0_g1_i7	MSTRG.3746.5	FBgn0000289	roo	Last exon	11.9573	0.999959
Head	AKA-017	FBtr0112843	TRINITY_DN13_c0_g1_i3	MSTRG.11241.1	FBgn0004860	roo	First exon	20.8795	1
Head	AKA-017	FBtr0112843	TRINITY_DN13_c0_g1_i3	MSTRG.11241.1	FBgn0004860	roo	Middle exon	20.8795	1
Head	AKA-017	FBtr0112868	TRINITY_DN1542_c0_g1_i4	MSTRG.12600.3	FBgn0011742	INE-1	Last exon	16.044	0.998038
Head	AKA-017	FBtr0113067	TRINITY_DN2791_c0_g1_i2	FBtr0113067	FBgn0033639	roo	First exon	26.6037	0.996614
Head	AKA-017	FBtr0113134	TRINITY_DN5069_c1_g1_i1	FBtr0113134	FBgn0263239	roo	Middle exon	6.14244	0.999999
Head	AKA-017	FBtr0113257	TRINITY_DN461_c0_g1_i3	MSTRG.9787.1	FBgn0038842	INE-1	Middle exon	15.6611	0.987948
Head	AKA-017	FBtr0113444	TRINITY_DN1282_c0_g1_i37	FBtr0113444	FBgn0052654	roo	Middle exon	23.5833	1
Head	AKA-017	FBtr0113895	TRINITY_DN3029_c0_g1_i1	FBtr0113895	FBgn0263977	INE-1	Last exon	39.9308	0.405961
Head	AKA-017	FBtr0273261	TRINITY_DN5111_c1_g1_i15	FBtr0273261	FBgn0035290	roo	Middle exon	29.9163	0.999992
Head	AKA-017	FBtr0273305	TRINITY_DN2789_c1_g1_i6	FBtr0273305	FBgn0036180	roo	Last exon	1.89505	0.999954
Head	AKA-017	FBtr0273306	TRINITY_DN2789_c1_g1_i7	FBtr0273306	FBgn0036180	roo	Last exon	43.4513	0.99996
Head	AKA-017	FBtr0273326	TRINITY_DN1092_c2_g1_i2	FBtr0273326	FBgn0050361	roo	First exon	26.4705	1
Head	AKA-017	FBtr0273326	TRINITY_DN1092_c2_g1_i2	FBtr0273326	FBgn0050361	roo	Last exon	26.4705	1
Head	AKA-017	FBtr0290112	TRINITY_DN1358_c0_g1_i1	FBtr0290112	FBgn0033313	roo	Middle exon	8.5295	1
Head	AKA-017	FBtr0290280	TRINITY_DN4549_c0_g1_i2	FBtr0290280	FBgn0033308	roo	First exon	2.51565	0.910918
Head	AKA-017	FBtr0290319	TRINITY_DN263_c1_g1_i6	FBtr0290319	FBgn0042693	roo	Middle exon	13.212	0.999995
Head	AKA-017	FBtr0299616	TRINITY_DN3523_c0_g1_i3	FBtr0299616	FBgn0259167	roo	First exon	8.19273	0.999191
Head	AKA-017	FBtr0299617	TRINITY_DN3523_c0_g1_i4	FBtr0299617	FBgn0259167	roo	First exon	3.53005	0.997656
Head	AKA-017	FBtr0299710	TRINITY_DN2142_c2_g1_i5	FBtr0299710	FBgn0259212	roo	Last exon	0.904557	1
Head	AKA-017	FBtr0299879	TRINITY_DN9837_c0_g1_i3	FBtr0299879	FBgn0032981	Idefix	First exon	8.86789	0.961202
Head	AKA-017	FBtr0299903	TRINITY_DN707_c1_g2_i1	FBtr0299903	FBgn0039966	INE-1	Last exon	36.3901	0.950513
Head	AKA-017	FBtr0299905	TRINITY_DN6007_c0_g1_i1	FBtr0299905	FBgn0032973	INE-1	Last exon	49.4399	0.99292
Head	AKA-017	FBtr0300103	TRINITY_DN2725_c0_g1_i25	FBtr0300103	FBgn0263780	INE-1	Last exon	8.24166	0.999998
Head	AKA-017	FBtr0300103	TRINITY_DN2725_c0_g1_i8	MSTRG.2545.1	FBgn0263780	INE-1	Last exon	10.9563	0.999998
Head	AKA-017	FBtr0300118	TRINITY_DN5985_c0_g1_i8	FBtr0300118	FBgn0266347	Gypsy-1_Dsim	Last exon	3.52799	0.771078
Head	AKA-017	FBtr0300118	TRINITY_DN5985_c0_g1_i8	FBtr0300118	FBgn0266347	INE-1	Middle exon	3.52799	0.771078
Head	AKA-017	FBtr0300118	TRINITY_DN5985_c0_g1_i8	FBtr0300118	FBgn0266347	INE-1	First exon	3.52799	0.771078
Head	AKA-017	FBtr0300118	TRINITY_DN5985_c0_g1_i8	FBtr0300118	FBgn0266347	INE-1	Last exon	3.52799	0.771078
Head	AKA-017	FBtr0300123	TRINITY_DN1820_c0_g1_i1	FBtr0300123	FBgn0014135	roo	Middle exon	22.0337	0.999994
Head	AKA-017	FBtr0300326	TRINITY_DN7108_c0_g2_i20	FBtr0300326	FBgn0040370	INE-1	Last exon	10.4872	0.491158
Head	AKA-017	FBtr0300474	TRINITY_DN715_c0_g2_i3	FBtr0300474	FBgn0087012	INE-1	Last exon	19.4512	0.99984
Head	AKA-017	FBtr0300999	TRINITY_DN10689_c0_g1_i1	FBtr0300999	FBgn0051612	INE-1	Last exon	3.46138	1
Head	AKA-017	FBtr0301071	TRINITY_DN1398_c3_g1_i2	FBtr0301071	FBgn0036274	roo	Middle exon	25.9235	0.999967
Head	AKA-017	FBtr0301670	TRINITY_DN2623_c0_g1_i2	FBtr0301670	FBgn0039282	roo	Middle exon	36.5315	1
Head	AKA-017	FBtr0301810	TRINITY_DN1770_c0_g1_i45	FBtr0301810	FBgn0086378	1360	Last exon	38.1137	0.165114
Head	AKA-017	FBtr0302023	TRINITY_DN1008_c0_g1_i4	FBtr0302023	FBgn0039054	roo	Middle exon	13.1636	0.999971
Head	AKA-017	FBtr0302330	TRINITY_DN1773_c0_g1_i11	MSTRG.3921.2	FBgn0023441	roo	Middle exon	7.87306	0.999999
Head	AKA-017	FBtr0302330	TRINITY_DN1773_c0_g1_i23	MSTRG.3921.1	FBgn0023441	roo	Middle exon	3.03232	0.999999
Head	AKA-017	FBtr0302410	TRINITY_DN4740_c0_g1_i2	FBtr0302410	FBgn0039993	1360	Last exon	12.5187	0.0475919
Head	AKA-017	FBtr0302542	TRINITY_DN964_c0_g1_i52	MSTRG.13145.5	FBgn0039945	INE-1	First exon	12.5495	0.924438
Head	AKA-017	FBtr0302650	TRINITY_DN623_c0_g1_i17	FBtr0302650	FBgn0261547	roo	Middle exon	5.4917	1
Head	AKA-017	FBtr0302650	TRINITY_DN623_c0_g1_i17	FBtr0302650	FBgn0261547	roo	First exon	5.4917	1
Head	AKA-017	FBtr0302651	TRINITY_DN623_c0_g1_i1	MSTRG.7191.3	FBgn0261547	roo	Middle exon	21.3347	1
Head	AKA-017	FBtr0302651	TRINITY_DN623_c0_g1_i20	FBtr0302651	FBgn0261547	roo	Middle exon	3.75348	1
Head	AKA-017	FBtr0302964	TRINITY_DN2142_c0_g1_i3	FBtr0302964	FBgn0030121	roo	Last exon	17.2317	0.999992
Head	AKA-017	FBtr0303015	TRINITY_DN4201_c1_g1_i21	FBtr0303015	FBgn0261641	INE-1	Middle exon	21.5096	0.999769
Head	AKA-017	FBtr0303015	TRINITY_DN4201_c1_g1_i21	FBtr0303015	FBgn0261641	R1A1-element	Middle exon	21.5096	0.999769
Head	AKA-017	FBtr0303272	TRINITY_DN1310_c4_g1_i3	FBtr0303272	FBgn0261802	INE-1	Last exon	7.41309	1
Head	AKA-017	FBtr0304110	TRINITY_DN2593_c1_g1_i9	FBtr0304110	FBgn0052218	roo	Unique	11.4669	0.797457
Head	AKA-017	FBtr0304582	TRINITY_DN1007_c1_g1_i5	FBtr0304582	FBgn0010015	roo	Last exon	11.5829	0.999996
Head	AKA-017	FBtr0304739	TRINITY_DN9837_c0_g1_i2	FBtr0304739	FBgn0032981	Idefix	First exon	1.54675	0.472076
Head	AKA-017	FBtr0304887	TRINITY_DN4064_c0_g1_i12	FBtr0304887	FBgn0000286	roo	First exon	1.86817	0.997168
Head	AKA-017	FBtr0304887	TRINITY_DN4064_c0_g1_i15	MSTRG.571.1	FBgn0000286	roo	First exon	23.8654	0.998157
Head	AKA-017	FBtr0304946	TRINITY_DN7594_c0_g1_i3	FBtr0304946	FBgn0262575	LARD	Unique	2.24405	0.762758
Head	AKA-017	FBtr0305002	TRINITY_DN558_c0_g2_i14	MSTRG.8055.1	FBgn0037299	INE-1	First exon	8.74243	0.780127
Head	AKA-017	FBtr0305011	TRINITY_DN3201_c0_g1_i2	MSTRG.9477.1	FBgn0262562	roo	First exon	20.603	1
Head	AKA-017	FBtr0305011	TRINITY_DN3201_c0_g1_i2	MSTRG.9477.1	FBgn0262562	roo	Middle exon	20.603	1
Head	AKA-017	FBtr0305011	TRINITY_DN3201_c0_g1_i7	FBtr0305011	FBgn0262562	roo	First exon	11.5492	1
Head	AKA-017	FBtr0305081	TRINITY_DN1358_c0_g1_i2	FBtr0305081	FBgn0033313	roo	Middle exon	2.98064	1
Head	AKA-017	FBtr0305082	TRINITY_DN1358_c0_g1_i4	FBtr0305082	FBgn0033313	roo	Middle exon	23.0491	1
Head	AKA-017	FBtr0305134	TRINITY_DN2027_c1_g2_i2	FBtr0305134	FBgn0004198	roo	Last exon	6.59317	1
Head	AKA-017	FBtr0305333	TRINITY_DN809_c0_g1_i3	FBtr0305333	FBgn0086358	roo	Last exon	1.28736	1
Head	AKA-017	FBtr0306151	TRINITY_DN1247_c2_g1_i1	FBtr0306151	FBgn0063485	roo	Middle exon	37.298	0.999993
Head	AKA-017	FBtr0306295	TRINITY_DN1310_c0_g2_i5	FBtr0306295	FBgn0262886	INE-1	Last exon	20.5209	0.0350279
Head	AKA-017	FBtr0306297	TRINITY_DN1310_c0_g2_i1	FBtr0306297	FBgn0262886	INE-1	Last exon	15.7308	0.0353936
Head	AKA-017	FBtr0306314	TRINITY_DN963_c0_g1_i11	FBtr0306314	FBgn0262901	INE-1	First exon	5.28396	0.0352165
Head	AKA-017	FBtr0306314	TRINITY_DN963_c0_g1_i11	FBtr0306314	FBgn0262901	INE-1	Middle exon	5.28396	0.0352165
Head	AKA-017	FBtr0307068	TRINITY_DN128_c1_g2_i3	FBtr0079175	FBgn0001942	blood	Last exon	10.9089	0.99981
Head	AKA-017	FBtr0307497	TRINITY_DN865_c0_g1_i14	FBtr0307497	FBgn0051619	INE-1	Middle exon	5.54833	1
Head	AKA-017	FBtr0307497	TRINITY_DN865_c0_g1_i14	FBtr0307497	FBgn0051619	INE-1	Last exon	5.54833	1
Head	AKA-017	FBtr0307499	TRINITY_DN17536_c0_g1_i1	FBtr0307499	FBgn0050432	INE-1	Unique	2.39346	0.618749
Head	AKA-017	FBtr0308254	TRINITY_DN1257_c3_g1_i17	FBtr0308254	FBgn0266557	roo	First exon	14.4544	1
Head	AKA-017	FBtr0308331	TRINITY_DN5985_c0_g1_i15	FBtr0308331	FBgn0266347	Gypsy-1_Dsim	Last exon	8.9726	0.000145571
Head	AKA-017	FBtr0308331	TRINITY_DN5985_c0_g1_i15	FBtr0308331	FBgn0266347	INE-1	First exon	8.9726	0.000145571
Head	AKA-017	FBtr0308331	TRINITY_DN5985_c0_g1_i15	FBtr0308331	FBgn0266347	INE-1	Last exon	8.9726	0.000145571
Head	AKA-017	FBtr0308576	TRINITY_DN5386_c0_g1_i10	MSTRG.12299.3	FBgn0041210	roo	Middle exon	16.2369	1
Head	AKA-017	FBtr0308576	TRINITY_DN5386_c0_g1_i3	MSTRG.12299.8	FBgn0041210	roo	Middle exon	12.4532	1
Head	AKA-017	FBtr0308592	TRINITY_DN752_c0_g1_i1	FBtr0308592	FBgn0062413	NewFam14	Last exon	9.76012	0.810058
Head	AKA-017	FBtr0309848	TRINITY_DN963_c0_g1_i10	FBtr0309848	FBgn0026238	INE-1	First exon	1.86444	0.428986
Head	AKA-017	FBtr0309849	TRINITY_DN963_c0_g1_i2	FBtr0309849	FBgn0026238	INE-1	First exon	2.06553	0.523291
Head	AKA-017	FBtr0310086	TRINITY_DN137_c0_g1_i17	FBtr0310086	FBgn0265991	roo	Middle exon	8.54593	1
Head	AKA-017	FBtr0310448	TRINITY_DN1358_c0_g1_i3	MSTRG.2996.3	FBgn0033313	roo	Middle exon	21.4627	1
Head	AKA-017	FBtr0310448	TRINITY_DN1358_c0_g1_i9	MSTRG.2996.4	FBgn0033313	roo	Middle exon	7.63751	1
Head	AKA-017	FBtr0329829	TRINITY_DN1770_c2_g1_i1	FBtr0329829	FBgn0250830	1360	Last exon	45.3653	0.999994
Head	AKA-017	FBtr0329963	TRINITY_DN3132_c0_g1_i1	FBtr0329963	FBgn0032796	roo	First exon	43.5692	1
Head	AKA-017	FBtr0330045	TRINITY_DN1562_c0_g1_i1	FBtr0330045	FBgn0038233	roo	Last exon	44.0687	0.998555
Head	AKA-017	FBtr0330261	TRINITY_DN6894_c0_g1_i8	FBtr0330261	FBgn0263993	roo	Last exon	6.81528	0.999986
Head	AKA-017	FBtr0331230	TRINITY_DN6874_c0_g1_i4	FBtr0331230	FBgn0031257	roo	Last exon	21.7366	0.999995
Head	AKA-017	FBtr0331397	TRINITY_DN1130_c0_g1_i5	FBtr0331397	FBgn0037206	INE-1	Last exon	6.87559	0.996884
Head	AKA-017	FBtr0331397	TRINITY_DN1130_c0_g1_i5	FBtr0331397	FBgn0037206	roo	Last exon	6.87559	0.996884
Head	AKA-017	FBtr0331678	TRINITY_DN3002_c0_g1_i6	MSTRG.2324.1	FBgn0032935	INE-1	Last exon	19.2706	0.997376
Head	AKA-017	FBtr0331702	TRINITY_DN2127_c1_g2_i13	FBtr0331702	FBgn0039479	jockey	Last exon	11.8932	0.987438
Head	AKA-017	FBtr0331744	TRINITY_DN1122_c0_g2_i4	FBtr0331744	FBgn0024251	roo	Middle exon	2.22419	0.999999
Head	AKA-017	FBtr0331780	TRINITY_DN5584_c1_g1_i11	FBtr0331780	FBgn0024804	gypsy10	Last exon	4.01508	0.91328
Head	AKA-017	FBtr0331812	TRINITY_DN2327_c0_g1_i14	FBtr0331812	FBgn0262532	INE-1	Middle exon	7.32741	0.552191
Head	AKA-017	FBtr0331812	TRINITY_DN2327_c0_g1_i14	FBtr0331812	FBgn0262532	hopper2	First exon	7.32741	0.552191
Head	AKA-017	FBtr0331812	TRINITY_DN2327_c0_g1_i14	FBtr0331812	FBgn0262532	hopper2	Last exon	7.32741	0.552191
Head	AKA-017	FBtr0331816	TRINITY_DN7815_c0_g2_i1	FBtr0331816	FBgn0036970	INE-1	Last exon	5.14976	0.997814
Head	AKA-017	FBtr0331941	TRINITY_DN1880_c0_g1_i2	FBtr0331941	FBgn0003175	roo	Middle exon	12.6529	1
Head	AKA-017	FBtr0331967	TRINITY_DN1183_c0_g1_i4	MSTRG.2629.1	FBgn0027507	INE-1	Middle exon	3.47641	0.999734
Head	AKA-017	FBtr0331967	TRINITY_DN1183_c0_g1_i4	MSTRG.2629.1	FBgn0027507	Rt1b	Last exon	3.47641	0.999734
Head	AKA-017	FBtr0332004	TRINITY_DN4782_c0_g1_i12	FBtr0332004	FBgn0264344	INE-1	First exon	1.06043	0.144031
Head	AKA-017	FBtr0332004	TRINITY_DN4782_c0_g1_i12	FBtr0332004	FBgn0264344	NewFam14	First exon	1.06043	0.144031
Head	AKA-017	FBtr0332004	TRINITY_DN4782_c0_g1_i12	FBtr0332004	FBgn0264344	NewFam14	Last exon	1.06043	0.144031
Head	AKA-017	FBtr0332539	TRINITY_DN1524_c0_g1_i2	FBtr0332539	FBgn0051475	roo	Middle exon	43.0965	0.999218
Head	AKA-017	FBtr0332633	TRINITY_DN4329_c0_g1_i2	FBtr0332633	FBgn0064225	INE-1	Last exon	37.4823	0.98673
Head	AKA-017	FBtr0332656	TRINITY_DN2158_c0_g1_i2	FBtr0332656	FBgn0043458	1360	Last exon	47.4108	1
Head	AKA-017	FBtr0332738	TRINITY_DN3210_c2_g1_i1	FBtr0332738	FBgn0035574	roo	First exon	26.2775	1
Head	AKA-017	FBtr0333134	TRINITY_DN1734_c1_g1_i3	FBtr0333134	FBgn0035477	roo	Middle exon	32.3242	0.999997
Head	AKA-017	FBtr0333182	TRINITY_DN6727_c0_g1_i1	FBtr0333182	FBgn0000719	gypsy12	Last exon	8.63289	0.999948
Head	AKA-017	FBtr0333189	TRINITY_DN1898_c0_g1_i1	FBtr0333189	FBgn0058198	INE-1	Last exon	49.1048	0.405756
Head	AKA-017	FBtr0333244	TRINITY_DN2437_c0_g2_i2	FBtr0333244	FBgn0264548	INE-1	First exon	5.14866	0.0218224
Head	AKA-017	FBtr0333266	TRINITY_DN2163_c0_g1_i2	FBtr0333266	FBgn0052479	pogo	Last exon	25.1553	0.999991
Head	AKA-017	FBtr0333266	TRINITY_DN2163_c0_g1_i2	FBtr0333266	FBgn0052479	roo	First exon	25.1553	0.999991
Head	AKA-017	FBtr0333600	TRINITY_DN3663_c0_g1_i1	FBtr0333600	FBgn0263602	P-element	First exon	36.8857	0.99821
Head	AKA-017	FBtr0333774	TRINITY_DN4751_c1_g2_i4	FBtr0333774	FBgn0264678	roo	First exon	2.4351	0.153376
Head	AKA-017	FBtr0333774	TRINITY_DN4751_c1_g2_i4	FBtr0333774	FBgn0264678	roo	Middle exon	2.4351	0.153376
Head	AKA-017	FBtr0333898	TRINITY_DN921_c0_g1_i3	MSTRG.5615.5	FBgn0262593	roo	Middle exon	15.8867	1
Head	AKA-017	FBtr0333910	TRINITY_DN4133_c0_g2_i9	FBtr0333910	FBgn0024733	BEL-4_Dfi	Last exon	8.02581	0.0715719
Head	AKA-017	FBtr0333910	TRINITY_DN4133_c0_g2_i9	FBtr0333910	FBgn0024733	diver2	Last exon	8.02581	0.0715719
Head	AKA-017	FBtr0333910	TRINITY_DN4133_c0_g2_i9	FBtr0333910	FBgn0024733	gypsy8	Last exon	8.02581	0.0715719
Head	AKA-017	FBtr0334112	TRINITY_DN9450_c0_g1_i1	FBtr0334112	FBgn0264727	INE-1	Unique	63.4192	NA
Head	AKA-017	FBtr0334498	TRINITY_DN3299_c0_g2_i4	FBtr0334498	FBgn0004882	roo	Middle exon	6.79369	0.992363
Head	AKA-017	FBtr0334747	TRINITY_DN2882_c1_g1_i6	FBtr0334747	FBgn0004179	roo	Middle exon	20.6286	0.689849
Head	AKA-017	FBtr0335016	TRINITY_DN293_c0_g1_i1	FBtr0335016	FBgn0038840	INE-1	Last exon	9.40797	1
Head	AKA-017	FBtr0335138	TRINITY_DN150_c2_g3_i1	FBtr0080883	FBgn0001185	INE-1	Last exon	64.5392	0.999842
Head	AKA-017	FBtr0335239	TRINITY_DN817_c2_g1_i7	FBtr0335239	FBgn0085386	S-element	Last exon	20.5926	1
Head	AKA-017	FBtr0335266	TRINITY_DN5604_c0_g2_i4	FBtr0085966	FBgn0033047	INE-1	Last exon	1.48191	0.999919
Head	AKA-017	FBtr0335269	TRINITY_DN4456_c0_g3_i1	FBtr0086043	FBgn0022288	Tc3	Unique	36.497	0.999248
Head	AKA-017	FBtr0335457	TRINITY_DN4175_c0_g2_i1	FBtr0335457	FBgn0264987	I-element	Unique	18.2281	0.269477
Head	AKA-017	FBtr0335457	TRINITY_DN4175_c0_g2_i1	FBtr0335457	FBgn0264987	hopper2	Unique	18.2281	0.269477
Head	AKA-017	FBtr0335512	TRINITY_DN1857_c0_g1_i10	FBtr0335512	FBgn0265003	Gypsy-1_Dsim	Last exon	14.871	1
Head	AKA-017	FBtr0335512	TRINITY_DN1857_c0_g1_i10	FBtr0335512	FBgn0265003	Gypsy-6_Dse	Last exon	14.871	1
Head	AKA-017	FBtr0335514	TRINITY_DN1857_c0_g1_i2	FBtr0335514	FBgn0265003	Gypsy-1_Dsim	Last exon	3.83213	1
Head	AKA-017	FBtr0335514	TRINITY_DN1857_c0_g1_i2	FBtr0335514	FBgn0265003	Gypsy-6_Dse	Last exon	3.83213	1
Head	AKA-017	FBtr0336480	TRINITY_DN4695_c0_g2_i2	FBtr0336480	FBgn0037228	G6	First exon	32.3965	0.996956
Head	AKA-017	FBtr0336480	TRINITY_DN4695_c0_g2_i2	FBtr0336480	FBgn0037228	INE-1	Last exon	32.3965	0.996956
Head	AKA-017	FBtr0336876	TRINITY_DN692_c0_g1_i3	FBtr0336876	FBgn0011217	roo	Middle exon	54.2326	0.310043
Head	AKA-017	FBtr0336876	TRINITY_DN692_c0_g1_i3	FBtr0336876	FBgn0011217	roo	Last exon	54.2326	0.310043
Head	AKA-017	FBtr0336924	TRINITY_DN707_c1_g2_i3	FBtr0336924	FBgn0039966	INE-1	Last exon	3.75467	0.952381
Head	AKA-017	FBtr0336925	TRINITY_DN3204_c0_g1_i9	FBtr0336925	FBgn0033185	1360	Last exon	18.0581	0.999969
Head	AKA-017	FBtr0336971	TRINITY_DN4744_c0_g2_i1	FBtr0336971	FBgn0259683	Micropia	First exon	6.78034	0.999996
Head	AKA-017	FBtr0337028	TRINITY_DN1008_c0_g1_i2	FBtr0337028	FBgn0039054	roo	Middle exon	8.14005	0.998351
Head	AKA-017	FBtr0337066	TRINITY_DN4013_c1_g2_i1	FBtr0337067	FBgn0019661	BS2	First exon	17.3088	0.00827475
Head	AKA-017	FBtr0337066	TRINITY_DN4013_c1_g2_i1	FBtr0337067	FBgn0019661	LARD	First exon	17.3088	0.00827475
Head	AKA-017	FBtr0337066	TRINITY_DN4013_c1_g2_i1	FBtr0337067	FBgn0019661	LARD	Last exon	17.3088	0.00827475
Head	AKA-017	FBtr0339604	TRINITY_DN309_c3_g1_i3	FBtr0339604	FBgn0265376	INE-1	Last exon	10.0925	0.015183
Head	AKA-017	FBtr0339611	TRINITY_DN2446_c4_g1_i1	FBtr0339611	FBgn0265379	roo	Last exon	42.6258	0.999996
Head	AKA-017	FBtr0339718	TRINITY_DN217_c0_g1_i14	FBtr0339718	FBgn0039688	roo	Middle exon	2.12462	0.999998
Head	AKA-017	FBtr0339894	TRINITY_DN715_c2_g1_i7	FBtr0339894	FBgn0010215	INE-1	Middle exon	17.6619	0.998156
Head	AKA-017	FBtr0339929	TRINITY_DN9330_c0_g1_i1	FBtr0339929	FBgn0265470	roo	Unique	2.96942	0.123726
Head	AKA-017	FBtr0340000	TRINITY_DN1302_c0_g1_i1	FBtr0340000	FBgn0034010	INE-1	Last exon	26.1183	0.796103
Head	AKA-017	FBtr0340199	TRINITY_DN1200_c0_g1_i39	FBtr0340199	FBgn0265767	INE-1	Middle exon	1.04828	0.995836
Head	AKA-017	FBtr0340490	TRINITY_DN1348_c1_g1_i2	MSTRG.12294.4	FBgn0265629	roo	First exon	12.8158	1
Head	AKA-017	FBtr0340490	TRINITY_DN1348_c1_g1_i3	MSTRG.12294.1	FBgn0265629	roo	First exon	33.6804	1
Head	AKA-017	FBtr0343315	TRINITY_DN35195_c0_g1_i2	FBtr0343315	FBgn0266048	roo	Unique	5.32216	0.158271
Head	AKA-017	FBtr0343363	TRINITY_DN4211_c0_g1_i4	FBtr0343363	FBgn0027528	jockey2	Last exon	46.4739	1
Head	AKA-017	FBtr0343726	TRINITY_DN4983_c0_g1_i5	FBtr0343726	FBgn0028644	INE-1	Last exon	12.171	0.995396
Head	AKA-017	FBtr0343825	TRINITY_DN3545_c0_g1_i5	FBtr0343825	FBgn0032688	roo	Last exon	6.57792	1
Head	AKA-017	FBtr0344027	TRINITY_DN2437_c0_g2_i3	FBtr0344027	FBgn0264548	INE-1	Unique	6.35481	0.0150909
Head	AKA-017	FBtr0344082	TRINITY_DN4384_c0_g1_i26	FBtr0111125	FBgn0002566	Gypsy-26_Dya	Last exon	22.6262	0.999995
Head	AKA-017	FBtr0344082	TRINITY_DN4384_c0_g1_i26	FBtr0111125	FBgn0002566	gypsy8	Last exon	22.6262	0.999995
Head	AKA-017	FBtr0344110	TRINITY_DN707_c0_g1_i2	FBtr0111192	FBgn0039965	Tc1	Last exon	19.9414	0.914842
Head	AKA-017	FBtr0344676	TRINITY_DN3336_c0_g1_i4	FBtr0344676	FBgn0266566	roo	Middle exon	2.27571	1
Head	AKA-017	FBtr0344714	TRINITY_DN1698_c1_g1_i1	FBtr0344714	FBgn0260386	roo	First exon	26.8953	0.999144
Head	AKA-017	FBtr0344725	TRINITY_DN10539_c0_g1_i1	FBtr0344725	FBgn0266577	INE-1	Last exon	3.09679	0.998908
Head	AKA-017	FBtr0344783	TRINITY_DN105_c3_g1_i13	FBtr0344783	FBgn0024555	P-element	First exon	2.24919	1
Head	AKA-017	FBtr0345000	TRINITY_DN2327_c0_g1_i21	FBtr0345000	FBgn0262532	INE-1	First exon	1.54474	0.204998
Head	AKA-017	FBtr0345000	TRINITY_DN2327_c0_g1_i21	FBtr0345000	FBgn0262532	INE-1	Middle exon	1.54474	0.204998
Head	AKA-017	FBtr0345000	TRINITY_DN2327_c0_g1_i21	FBtr0345000	FBgn0262532	hopper2	First exon	1.54474	0.204998
Head	AKA-017	FBtr0345000	TRINITY_DN2327_c0_g1_i21	FBtr0345000	FBgn0262532	hopper2	Last exon	1.54474	0.204998
Head	AKA-017	FBtr0345008	TRINITY_DN1467_c0_g1_i73	FBtr0345008	FBgn0039994	1360	First exon	3.92311	0.979092
Head	AKA-017	FBtr0345008	TRINITY_DN1467_c0_g1_i73	FBtr0345008	FBgn0039994	INE-1	First exon	3.92311	0.979092
Head	AKA-017	FBtr0345028	TRINITY_DN2997_c0_g1_i7	MSTRG.5619.2	FBgn0035388	roo	Middle exon	51.6559	0.999876
Head	AKA-017	FBtr0345418	TRINITY_DN1358_c2_g1_i2	FBtr0086921	FBgn0028953	roo	Last exon	58.9719	0.99916
Head	AKA-017	FBtr0345594	TRINITY_DN829_c0_g1_i1	FBtr0077049	FBgn0035676	roo	Last exon	42.9524	1
Head	AKA-017	FBtr0345799	TRINITY_DN2700_c0_g1_i3	FBtr0345799	FBgn0033177	INE-1	Last exon	17.2823	0.999999
Head	AKA-017	FBtr0345806	TRINITY_DN583_c1_g1_i1	FBtr0075098	FBgn0042134	roo	Last exon	57.69	1
Head	AKA-017	FBtr0345859	TRINITY_DN2327_c0_g1_i26	FBtr0304979	FBgn0262533	INE-1	First exon	7.28016	0.124288
Head	AKA-017	FBtr0346278	TRINITY_DN1590_c1_g2_i1	FBtr0346278	FBgn0263705	roo	Middle exon	15.8027	1
Head	AKA-017	FBtr0346413	TRINITY_DN8028_c0_g2_i1	FBtr0346413	FBgn0267233	INE-1	Unique	2.56785	0.00485115
Head	AKA-017	FBtr0346555	TRINITY_DN4053_c1_g1_i1	FBtr0346555	FBgn0267300	Rt1b	Last exon	3.15704	0.00691975
Head	AKA-017	FBtr0346608	TRINITY_DN1839_c0_g1_i11	FBtr0346608	FBgn0003464	roo	Middle exon	20.4247	1
Head	AKA-017	FBtr0346819	TRINITY_DN227_c0_g1_i8	FBtr0346819	FBgn0037098	roo	Middle exon	6.94362	1
Head	AKA-017	FBtr0347211	TRINITY_DN586_c0_g1_i29	FBtr0347211	FBgn0053208	roo	First exon	1.935	1
Head	AKA-017	FBtr0347540	TRINITY_DN227_c0_g1_i6	FBtr0346817	FBgn0037098	roo	Middle exon	37.4702	1
Head	AKA-017	FBtr0433504	TRINITY_DN2492_c3_g1_i1	FBtr0433504	FBgn0030311	pogo	Last exon	57.7484	0.961796
Head	AKA-017	FBtr0452129	TRINITY_DN2784_c0_g1_i5	FBtr0081513	FBgn0284230	INE-1	First exon	11.5868	0.412731
Head	AKA-017	FBtr0472956	TRINITY_DN2079_c0_g1_i26	FBtr0472956	FBgn0052582	INE-1	First exon	3.47532	0.237831
Head	AKA-017	FBtr0473730	TRINITY_DN2100_c1_g1_i48	FBtr0473730	FBgn0265959	INE-1	Middle exon	1.55588	0.999813
Head	JUT-011	FBtr0070003	TRINITY_DN33931_c0_g1_i1	FBtr0070003	FBgn0062565	INE-1	Last exon	8.24045	0.999452
Head	JUT-011	FBtr0070396	TRINITY_DN1401_c0_g1_i8	FBtr0070396	FBgn0000810	roo	First exon	33.3501	0.999454
Head	JUT-011	FBtr0070669	TRINITY_DN3150_c0_g3_i1	FBtr0070669	FBgn0026079	hopper2	Last exon	51.5085	1
Head	JUT-011	FBtr0070950	TRINITY_DN1522_c2_g5_i1	FBtr0070950	FBgn0028360	roo	Last exon	61.419	0.999998
Head	JUT-011	FBtr0070969	TRINITY_DN304_c2_g1_i4	FBtr0070969	FBgn0086693	roo	Last exon	9.96848	1
Head	JUT-011	FBtr0071342	TRINITY_DN7632_c5_g1_i1	FBtr0071342	FBgn0030096	INE-1	Last exon	59.1087	0.999947
Head	JUT-011	FBtr0072285	TRINITY_DN4017_c0_g1_i5	FBtr0072285	FBgn0034976	roo	First exon	5.32878	1
Head	JUT-011	FBtr0072451	TRINITY_DN288_c1_g1_i3	FBtr0072451	FBgn0050428	INE-1	Last exon	13.7848	0.526857
Head	JUT-011	FBtr0072466	TRINITY_DN855_c0_g1_i3	FBtr0072466	FBgn0020386	roo	Middle exon	3.46063	0.999947
Head	JUT-011	FBtr0072468	TRINITY_DN855_c0_g1_i12	FBtr0072468	FBgn0020386	roo	Middle exon	1.3784	0.999978
Head	JUT-011	FBtr0072578	TRINITY_DN2437_c0_g1_i1	FBtr0072578	FBgn0000575	P-element	First exon	59.4118	0.923669
Head	JUT-011	FBtr0072578	TRINITY_DN2437_c0_g1_i1	FBtr0072578	FBgn0000575	roo	First exon	59.4118	0.923669
Head	JUT-011	FBtr0072589	TRINITY_DN2643_c1_g5_i1	FBtr0072589	FBgn0052479	pogo	Last exon	17.5877	1
Head	JUT-011	FBtr0072589	TRINITY_DN2643_c1_g5_i1	FBtr0072589	FBgn0052479	roo	Middle exon	17.5877	1
Head	JUT-011	FBtr0072711	TRINITY_DN2679_c0_g1_i3	FBtr0072711	FBgn0043458	1360	Last exon	6.5746	1
Head	JUT-011	FBtr0073387	TRINITY_DN2803_c0_g2_i1	FBtr0073387	FBgn0030251	roo	First exon	3.97067	0.999959
Head	JUT-011	FBtr0073454	TRINITY_DN1626_c1_g1_i2	MSTRG.12107.1	FBgn0000499	roo	Unique	61.4645	0.999997
Head	JUT-011	FBtr0073685	TRINITY_DN4144_c0_g5_i1	FBtr0073685	FBgn0030417	roo	Last exon	9.88464	0.999999
Head	JUT-011	FBtr0074174	TRINITY_DN879_c5_g1_i2	MSTRG.12534.1	FBgn0026076	roo	First exon	40.0787	0.958176
Head	JUT-011	FBtr0074579	TRINITY_DN5096_c0_g1_i1	FBtr0074579	FBgn0030912	jockey	First exon	31.4949	0.901329
Head	JUT-011	FBtr0074696	TRINITY_DN4038_c1_g6_i1	FBtr0074696	FBgn0030995	INE-1	First exon	15.7648	0.998058
Head	JUT-011	FBtr0075054	TRINITY_DN514_c5_g1_i5	FBtr0075054	FBgn0036811	roo	Last exon	62.7826	0.906687
Head	JUT-011	FBtr0075171	TRINITY_DN2833_c0_g1_i5	FBtr0075171	FBgn0052190	roo	Last exon	65.0769	0.999995
Head	JUT-011	FBtr0075330	TRINITY_DN10_c18_g1_i1	FBtr0075330	FBgn0036668	roo	Last exon	53.4716	1
Head	JUT-011	FBtr0075855	TRINITY_DN4802_c0_g1_i1	FBtr0075855	FBgn0036360	roo	Middle exon	29.0301	0.999116
Head	JUT-011	FBtr0076368	TRINITY_DN2152_c0_g1_i4	FBtr0076368	FBgn0004390	roo	Last exon	29.0246	1
Head	JUT-011	FBtr0076369	TRINITY_DN4246_c1_g1_i2	FBtr0076369	FBgn0015618	roo	Last exon	27.0397	0.999816
Head	JUT-011	FBtr0077267	TRINITY_DN4864_c0_g1_i4	MSTRG.13048.1	FBgn0031144	Tc3	Last exon	7.91935	0.999731
Head	JUT-011	FBtr0077571	TRINITY_DN1779_c5_g1_i1	FBtr0077571	FBgn0005616	INE-1	Last exon	41.4382	1
Head	JUT-011	FBtr0077765	TRINITY_DN745_c5_g1_i2	FBtr0331438	FBgn0031420	roo	Last exon	38.5001	1
Head	JUT-011	FBtr0077957	TRINITY_DN1020_c0_g1_i1	FBtr0077957	FBgn0031306	roo	First exon	17.0674	0.980927
Head	JUT-011	FBtr0078154	TRINITY_DN3098_c0_g1_i20	FBtr0078154	FBgn0025683	Quasimodo2	Middle exon	7.09711	0.999998
Head	JUT-011	FBtr0078157	TRINITY_DN1404_c0_g1_i2	MSTRG.20.10	FBgn0031220	INE-1	Last exon	1.21908	0.999897
Head	JUT-011	FBtr0078158	TRINITY_DN1404_c0_g1_i47	FBtr0078158	FBgn0031220	INE-1	Last exon	7.31743	0.99989
Head	JUT-011	FBtr0078160	TRINITY_DN1708_c5_g1_i1	FBtr0336838	FBgn0031219	INE-1	Unique	20.2754	0.545266
Head	JUT-011	FBtr0078243	TRINITY_DN3691_c0_g1_i2	FBtr0078243	FBgn0037014	roo	Middle exon	8.48798	1
Head	JUT-011	FBtr0078348	TRINITY_DN3009_c1_g1_i2	FBtr0330156	FBgn0005694	roo	Middle exon	10.3719	0.647479
Head	JUT-011	FBtr0078354	TRINITY_DN5753_c0_g1_i12	FBtr0078354	FBgn0037090	INE-1	First exon	2.2539	0.999945
Head	JUT-011	FBtr0078393	TRINITY_DN13673_c0_g2_i1	FBtr0078393	FBgn0037086	INE-1	First exon	3.19678	0.568038
Head	JUT-011	FBtr0078485	TRINITY_DN424_c0_g1_i1	MSTRG.7760.2	FBgn0037150	HB	First exon	39.9914	0.954747
Head	JUT-011	FBtr0078485	TRINITY_DN424_c0_g1_i2	FBtr0078485	FBgn0037150	HB	First exon	24.6901	0.973688
Head	JUT-011	FBtr0078495	TRINITY_DN421_c3_g1_i3	FBtr0078495	FBgn0004179	roo	Middle exon	17.637	0.811114
Head	JUT-011	FBtr0078535	TRINITY_DN2168_c0_g1_i48	FBtr0078535	FBgn0010830	Doc4	Last exon	5.00967	0.815026
Head	JUT-011	FBtr0078535	TRINITY_DN2168_c0_g1_i48	FBtr0078535	FBgn0010830	INE-1	Last exon	5.00967	0.815026
Head	JUT-011	FBtr0078582	TRINITY_DN1076_c3_g1_i2	MSTRG.7813.5	FBgn0027339	roo	Last exon	22.0455	0.933615
Head	JUT-011	FBtr0078787	TRINITY_DN27739_c0_g1_i1	FBtr0078787	FBgn0003275	roo	Last exon	67.9191	0.940141
Head	JUT-011	FBtr0078917	TRINITY_DN2539_c0_g2_i2	FBtr0078917	FBgn0037240	INE-1	Last exon	54.8148	1
Head	JUT-011	FBtr0078919	TRINITY_DN2897_c0_g1_i6	FBtr0302339	FBgn0037241	INE-1	Last exon	8.57195	0.996538
Head	JUT-011	FBtr0078928	TRINITY_DN5050_c0_g1_i1	FBtr0078928	FBgn0037255	Tc1-2	Last exon	50.38	0.999999
Head	JUT-011	FBtr0078995	TRINITY_DN4223_c0_g1_i1	FBtr0078995	FBgn0031659	S-element	Unique	65.5145	0.999996
Head	JUT-011	FBtr0079139	TRINITY_DN339_c0_g5_i1	FBtr0079139	FBgn0031740	roo	Last exon	49.1606	0.999926
Head	JUT-011	FBtr0079178	TRINITY_DN2104_c1_g1_i2	FBtr0079178	FBgn0001942	blood	Middle exon	29.0536	0.999634
Head	JUT-011	FBtr0080188	TRINITY_DN3468_c1_g1_i10	FBtr0080188	FBgn0011676	roo	First exon	16.7326	1
Head	JUT-011	FBtr0080200	TRINITY_DN599_c9_g1_i1	FBtr0080200	FBgn0032348	roo	Last exon	44.0024	1
Head	JUT-011	FBtr0080252	TRINITY_DN2375_c1_g1_i1	FBtr0080252	FBgn0015400	roo	Last exon	39.4491	0.999999
Head	JUT-011	FBtr0080700	TRINITY_DN3378_c1_g1_i1	FBtr0346621	FBgn0004837	roo	First exon	47.5721	0.999977
Head	JUT-011	FBtr0080975	TRINITY_DN9244_c1_g1_i1	MSTRG.1911.15	FBgn0020503	roo	First exon	63.2081	1
Head	JUT-011	FBtr0081070	TRINITY_DN3916_c0_g1_i3	FBtr0081070	FBgn0032688	roo	Last exon	35.9089	1
Head	JUT-011	FBtr0081145	TRINITY_DN971_c0_g1_i4	FBtr0081145	FBgn0263198	blood	Last exon	14.7469	0.999999
Head	JUT-011	FBtr0081145	TRINITY_DN971_c0_g1_i8	MSTRG.2053.1	FBgn0263198	blood	Last exon	18.3217	0.690974
Head	JUT-011	FBtr0081282	TRINITY_DN4754_c0_g1_i2	FBtr0081282	FBgn0032796	roo	First exon	5.5547	1
Head	JUT-011	FBtr0081283	TRINITY_DN4754_c0_g1_i1	FBtr0081283	FBgn0032796	roo	First exon	2.4461	1
Head	JUT-011	FBtr0081391	TRINITY_DN943_c0_g2_i1	FBtr0336825	FBgn0032877	roo	Unique	12.1435	0.971588
Head	JUT-011	FBtr0081479	TRINITY_DN1174_c0_g1_i4	FBtr0081479	FBgn0261239	Micropia	Last exon	16.9105	0.999998
Head	JUT-011	FBtr0081480	TRINITY_DN1174_c0_g1_i3	FBtr0081480	FBgn0261239	Micropia	Last exon	20.7973	0.999999
Head	JUT-011	FBtr0081488	TRINITY_DN26520_c0_g1_i1	FBtr0081488	FBgn0032934	INE-1	Unique	15.2423	0.999998
Head	JUT-011	FBtr0081612	TRINITY_DN4_c0_g2_i2	FBtr0081612	FBgn0261238	roo	Middle exon	6.67589	1
Head	JUT-011	FBtr0081612	TRINITY_DN4_c0_g2_i2	FBtr0081612	FBgn0261238	roo	Last exon	6.67589	1
Head	JUT-011	FBtr0081613	TRINITY_DN4_c0_g2_i7	FBtr0081613	FBgn0261238	roo	Middle exon	11.4901	1
Head	JUT-011	FBtr0081613	TRINITY_DN4_c0_g2_i7	FBtr0081613	FBgn0261238	roo	Last exon	11.4901	1
Head	JUT-011	FBtr0082117	TRINITY_DN2022_c2_g1_i5	MSTRG.8544.1	FBgn0037705	roo	First exon	28.617	0.999999
Head	JUT-011	FBtr0083661	TRINITY_DN3431_c0_g1_i2	FBtr0083661	FBgn0044871	roo	Last exon	63.393	0.982623
Head	JUT-011	FBtr0083731	TRINITY_DN1736_c0_g1_i12	FBtr0083731	FBgn0038681	Bari1	Last exon	3.02714	0.999862
Head	JUT-011	FBtr0083795	TRINITY_DN3164_c0_g1_i2	FBtr0083795	FBgn0014135	roo	Middle exon	0.599669	0.999999
Head	JUT-011	FBtr0083887	TRINITY_DN2975_c0_g1_i1	FBtr0083887	FBgn0038798	BS	Last exon	24.4951	0.997002
Head	JUT-011	FBtr0083913	TRINITY_DN3575_c3_g1_i1	FBtr0083913	FBgn0038815	roo	Middle exon	46.0271	0.999983
Head	JUT-011	FBtr0083978	TRINITY_DN6363_c0_g1_i1	FBtr0083978	FBgn0038840	INE-1	Last exon	3.72432	1
Head	JUT-011	FBtr0083998	TRINITY_DN473_c0_g1_i13	FBtr0083998	FBgn0013995	roo	Middle exon	22.3693	1
Head	JUT-011	FBtr0084167	TRINITY_DN304_c3_g1_i16	FBtr0084167	FBgn0027575	roo	Middle exon	14.7054	1
Head	JUT-011	FBtr0085347	TRINITY_DN548_c0_g1_i9	FBtr0085347	FBgn0039617	roo	Middle exon	30.2986	0.990691
Head	JUT-011	FBtr0085355	TRINITY_DN1965_c1_g1_i2	FBtr0085355	FBgn0039601	roo	Last exon	59.6325	0.999994
Head	JUT-011	FBtr0085718	TRINITY_DN1961_c0_g1_i1	FBtr0085718	FBgn0039807	roo	Unique	34.961	0.998259
Head	JUT-011	FBtr0085877	TRINITY_DN2392_c0_g1_i2	FBtr0085877	FBgn0040206	INE-1	Last exon	36.3599	0.940993
Head	JUT-011	FBtr0085903	TRINITY_DN1305_c0_g1_i5	FBtr0085903	FBgn0032961	Gypsy-1_Dsim	Last exon	23.6737	0.993977
Head	JUT-011	FBtr0085903	TRINITY_DN1305_c0_g1_i5	FBtr0085903	FBgn0032961	INE-1	Last exon	23.6737	0.993977
Head	JUT-011	FBtr0085904	TRINITY_DN1305_c0_g1_i1	FBtr0085904	FBgn0032961	Gypsy-1_Dsim	Last exon	22.5717	0.994435
Head	JUT-011	FBtr0085904	TRINITY_DN1305_c0_g1_i1	FBtr0085904	FBgn0032961	INE-1	Last exon	22.5717	0.994435
Head	JUT-011	FBtr0085905	TRINITY_DN1305_c0_g1_i3	FBtr0085905	FBgn0032961	Gypsy-1_Dsim	Last exon	1.12216	0.682914
Head	JUT-011	FBtr0085905	TRINITY_DN1305_c0_g1_i3	FBtr0085905	FBgn0032961	INE-1	Last exon	1.12216	0.682914
Head	JUT-011	FBtr0086040	TRINITY_DN947_c0_g1_i1	MSTRG.2636.3	FBgn0259978	INE-1	Last exon	3.91041	0.999908
Head	JUT-011	FBtr0086040	TRINITY_DN947_c0_g1_i20	MSTRG.2636.1	FBgn0259978	INE-1	Last exon	39.3475	0.999802
Head	JUT-011	FBtr0086055	TRINITY_DN453_c2_g1_i2	FBtr0086055	FBgn0025693	INE-1	Last exon	2.2777	0.998634
Head	JUT-011	FBtr0086081	TRINITY_DN10_c2_g1_i3	FBtr0086081	FBgn0033010	INE-1	Last exon	26.905	0.999989
Head	JUT-011	FBtr0086081	TRINITY_DN10_c2_g1_i3	FBtr0086081	FBgn0033010	transib4	First exon	26.905	0.999989
Head	JUT-011	FBtr0086091	TRINITY_DN2070_c0_g1_i2	FBtr0086091	FBgn0033021	INE-1	Last exon	31.6647	0.999978
Head	JUT-011	FBtr0086501	TRINITY_DN1577_c0_g1_i29	FBtr0086501	FBgn0034452	pogo	Last exon	1.42551	1
Head	JUT-011	FBtr0086567	TRINITY_DN172_c7_g1_i1	FBtr0086567	FBgn0034408	roo	First exon	22.4384	1
Head	JUT-011	FBtr0086922	TRINITY_DN835_c2_g1_i1	FBtr0086922	FBgn0028953	roo	Last exon	2.80016	0.999328
Head	JUT-011	FBtr0086923	TRINITY_DN418_c0_g1_i3	FBtr0086923	FBgn0022987	roo	Last exon	2.74352	0.983045
Head	JUT-011	FBtr0086955	TRINITY_DN1040_c0_g1_i19	FBtr0086955	FBgn0028956	INE-1	Last exon	7.85341	0.999604
Head	JUT-011	FBtr0087242	TRINITY_DN694_c1_g1_i1	FBtr0087242	FBgn0034087	INE-1	Last exon	57.507	1
Head	JUT-011	FBtr0087315	TRINITY_DN605_c1_g1_i2	MSTRG.3937.3	FBgn0265991	roo	Middle exon	10.6841	1
Head	JUT-011	FBtr0087369	TRINITY_DN1502_c0_g1_i4	FBtr0087369	FBgn0286785	INE-1	Last exon	8.65792	1
Head	JUT-011	FBtr0087370	TRINITY_DN1502_c0_g1_i2	FBtr0087370	FBgn0286785	INE-1	Last exon	45.8288	1
Head	JUT-011	FBtr0087392	TRINITY_DN4405_c0_g1_i1	FBtr0087392	FBgn0034008	hopper2	Unique	51.8303	0.973589
Head	JUT-011	FBtr0088114	TRINITY_DN383_c1_g2_i1	FBtr0088114	FBgn0033602	roo	Last exon	75.7141	0.998926
Head	JUT-011	FBtr0088381	TRINITY_DN2395_c0_g1_i9	FBtr0088381	FBgn0285892	INE-1	Middle exon	4.68477	1
Head	JUT-011	FBtr0088487	TRINITY_DN1615_c0_g1_i5	FBtr0088487	FBgn0033448	roo	First exon	21.8586	0.999955
Head	JUT-011	FBtr0088886	TRINITY_DN4298_c0_g1_i2	FBtr0088886	FBgn0033233	INE-1	First exon	32.7296	0.999825
Head	JUT-011	FBtr0089007	TRINITY_DN1035_c5_g1_i4	FBtr0089007	FBgn0033166	INE-1	Last exon	27.9403	0.998867
Head	JUT-011	FBtr0089028	TRINITY_DN5727_c1_g1_i14	FBtr0336872	FBgn0033130	roo	Middle exon	2.24829	0.517267
Head	JUT-011	FBtr0089052	TRINITY_DN157_c1_g3_i1	FBtr0089052	FBgn0002930	roo	Middle exon	70.5605	0.999977
Head	JUT-011	FBtr0089361	TRINITY_DN776_c0_g1_i34	FBtr0089361	FBgn0283521	roo	Middle exon	6.14056	0.997241
Head	JUT-011	FBtr0089364	TRINITY_DN776_c0_g1_i10	FBtr0089364	FBgn0283521	roo	Middle exon	1.62806	0.999971
Head	JUT-011	FBtr0089597	TRINITY_DN514_c0_g5_i1	FBtr0089597	FBgn0036900	INE-1	Last exon	61.4289	0.999999
Head	JUT-011	FBtr0089597	TRINITY_DN514_c0_g5_i1	FBtr0089597	FBgn0036900	roo	Last exon	61.4289	0.999999
Head	JUT-011	FBtr0089678	TRINITY_DN326_c1_g1_i3	FBtr0089678	FBgn0003464	roo	Middle exon	33.7036	1
Head	JUT-011	FBtr0089717	TRINITY_DN32_c5_g2_i1	FBtr0089717	FBgn0003118	roo	Middle exon	11.4695	0.999992
Head	JUT-011	FBtr0100407	TRINITY_DN4742_c1_g1_i7	FBtr0100407	FBgn0032979	INE-1	Last exon	10.5919	0.998033
Head	JUT-011	FBtr0100511	TRINITY_DN3709_c0_g1_i11	FBtr0100511	FBgn0032955	INE-1	Last exon	2.47099	0.738646
Head	JUT-011	FBtr0111111	TRINITY_DN4518_c0_g1_i5	FBtr0308810	FBgn0046692	Gypsy-1_Dsim	Last exon	41.7057	0.827321
Head	JUT-011	FBtr0111111	TRINITY_DN4518_c0_g1_i5	FBtr0308810	FBgn0046692	Gypsy-6_Dse	Last exon	41.7057	0.827321
Head	JUT-011	FBtr0111144	TRINITY_DN1753_c2_g1_i2	FBtr0111144	FBgn0287187	1360	Last exon	9.095	0.0128342
Head	JUT-011	FBtr0111144	TRINITY_DN1753_c2_g1_i2	FBtr0111144	FBgn0287187	INE-1	First exon	9.095	0.0128342
Head	JUT-011	FBtr0111144	TRINITY_DN1753_c2_g1_i2	FBtr0111144	FBgn0287187	INE-1	Last exon	9.095	0.0128342
Head	JUT-011	FBtr0111252	TRINITY_DN3730_c0_g1_i2	MSTRG.2492.5	FBgn0040011	1360	Last exon	39.9138	1
Head	JUT-011	FBtr0112868	TRINITY_DN3503_c1_g1_i1	MSTRG.12600.3	FBgn0011742	INE-1	Last exon	19.5631	0.998162
Head	JUT-011	FBtr0113067	TRINITY_DN350_c6_g1_i1	FBtr0113067	FBgn0033639	roo	First exon	37.6268	0.998327
Head	JUT-011	FBtr0113106	TRINITY_DN779_c0_g1_i23	MSTRG.4814.2	FBgn0034720	roo	Middle exon	9.53291	1
Head	JUT-011	FBtr0113257	TRINITY_DN760_c0_g1_i1	MSTRG.9787.1	FBgn0038842	INE-1	Middle exon	25.68	0.987117
Head	JUT-011	FBtr0113378	TRINITY_DN1216_c0_g1_i8	MSTRG.4124.8	FBgn0050460	roo	Last exon	20.9427	1
Head	JUT-011	FBtr0113895	TRINITY_DN5322_c0_g2_i1	FBtr0113895	FBgn0263977	INE-1	Last exon	64.6537	0.601177
Head	JUT-011	FBtr0113990	TRINITY_DN1597_c1_g1_i5	FBtr0113990	FBgn0039955	INE-1	Last exon	3.82767	1
Head	JUT-011	FBtr0114589	TRINITY_DN1973_c0_g1_i21	FBtr0114589	FBgn0010280	roo	Middle exon	15.6262	1
Head	JUT-011	FBtr0114594	TRINITY_DN383_c0_g1_i9	FBtr0114594	FBgn0030087	roo	Middle exon	31.5543	1
Head	JUT-011	FBtr0290046	TRINITY_DN4143_c0_g1_i17	FBtr0290046	FBgn0085376	roo	Last exon	4.31567	1
Head	JUT-011	FBtr0299616	TRINITY_DN4695_c0_g1_i2	FBtr0299616	FBgn0259167	roo	First exon	8.73562	0.999964
Head	JUT-011	FBtr0299617	TRINITY_DN4695_c0_g1_i4	FBtr0299617	FBgn0259167	roo	First exon	1.8002	0.987415
Head	JUT-011	FBtr0299789	TRINITY_DN2291_c0_g1_i2	FBtr0299789	FBgn0259227	roo	Middle exon	51.7583	1
Head	JUT-011	FBtr0299905	TRINITY_DN6311_c0_g1_i2	FBtr0299905	FBgn0032973	INE-1	Last exon	53.0683	0.993424
Head	JUT-011	FBtr0300103	TRINITY_DN2143_c0_g1_i14	MSTRG.2545.1	FBgn0263780	INE-1	Last exon	5.8476	0.999998
Head	JUT-011	FBtr0300103	TRINITY_DN2143_c0_g1_i24	FBtr0300103	FBgn0263780	INE-1	Last exon	7.86583	0.999998
Head	JUT-011	FBtr0300118	TRINITY_DN10414_c0_g1_i7	FBtr0300118	FBgn0266347	Gypsy-1_Dsim	Last exon	10.0344	0.917926
Head	JUT-011	FBtr0300118	TRINITY_DN10414_c0_g1_i7	FBtr0300118	FBgn0266347	INE-1	Last exon	10.0344	0.917926
Head	JUT-011	FBtr0300123	TRINITY_DN3164_c0_g1_i3	FBtr0300123	FBgn0014135	roo	Middle exon	11.0389	0.999995
Head	JUT-011	FBtr0300326	TRINITY_DN6074_c1_g1_i4	FBtr0300326	FBgn0040370	INE-1	Last exon	29.8516	0.562377
Head	JUT-011	FBtr0300474	TRINITY_DN1421_c1_g1_i7	FBtr0300474	FBgn0087012	INE-1	Last exon	5.54491	0.999828
Head	JUT-011	FBtr0301040	TRINITY_DN84_c3_g1_i1	MSTRG.1113.6	FBgn0052982	roo	Middle exon	22.0404	0.999999
Head	JUT-011	FBtr0301040	TRINITY_DN84_c3_g1_i10	MSTRG.1113.7	FBgn0052982	roo	Middle exon	18.0778	1
Head	JUT-011	FBtr0301040	TRINITY_DN84_c3_g1_i2	MSTRG.1113.8	FBgn0052982	roo	Middle exon	7.80215	0.999997
Head	JUT-011	FBtr0301071	TRINITY_DN2269_c2_g1_i1	FBtr0301071	FBgn0036274	roo	Middle exon	26.5267	0.999948
Head	JUT-011	FBtr0301459	TRINITY_DN888_c0_g1_i18	FBtr0301459	FBgn0032940	INE-1	Last exon	15.4819	1
Head	JUT-011	FBtr0301460	TRINITY_DN888_c0_g1_i11	MSTRG.2336.1	FBgn0032940	INE-1	Last exon	24.3548	1
Head	JUT-011	FBtr0301978	TRINITY_DN5149_c0_g1_i1	FBtr0301978	FBgn0039946	INE-1	Last exon	21.011	0.995542
Head	JUT-011	FBtr0302023	TRINITY_DN617_c3_g1_i3	FBtr0302023	FBgn0039054	roo	Middle exon	30.1535	0.999971
Head	JUT-011	FBtr0302387	TRINITY_DN3730_c0_g1_i5	FBtr0302387	FBgn0040011	1360	Last exon	7.46288	1
Head	JUT-011	FBtr0302410	TRINITY_DN2143_c0_g2_i12	FBtr0302410	FBgn0039993	1360	Last exon	18.459	0.0514666
Head	JUT-011	FBtr0302542	TRINITY_DN882_c0_g1_i23	MSTRG.13145.2	FBgn0039945	INE-1	First exon	6.65047	0.145142
Head	JUT-011	FBtr0302651	TRINITY_DN516_c0_g1_i5	MSTRG.7191.3	FBgn0261547	roo	Middle exon	15.501	1
Head	JUT-011	FBtr0302709	TRINITY_DN280_c0_g2_i3	FBtr0302709	FBgn0261555	roo	Last exon	13.7906	0.999998
Head	JUT-011	FBtr0302710	TRINITY_DN280_c0_g2_i6	FBtr0302710	FBgn0261555	roo	Last exon	20.1273	1
Head	JUT-011	FBtr0302910	TRINITY_DN789_c0_g3_i7	FBtr0302910	FBgn0265298	roo	Last exon	21.6091	0.84598
Head	JUT-011	FBtr0303163	TRINITY_DN304_c3_g2_i3	FBtr0303163	FBgn0085370	roo	First exon	38.8835	1
Head	JUT-011	FBtr0303207	TRINITY_DN6935_c0_g1_i4	FBtr0303207	FBgn0031903	roo	Middle exon	1.74551	0.999537
Head	JUT-011	FBtr0303271	TRINITY_DN2143_c1_g1_i1	FBtr0303271	FBgn0261802	INE-1	Last exon	29.2247	1
Head	JUT-011	FBtr0303271	TRINITY_DN2143_c1_g1_i1	FBtr0303271	FBgn0261802	INE-1	First exon	29.2247	1
Head	JUT-011	FBtr0303434	TRINITY_DN203_c0_g1_i13	MSTRG.3854.14	FBgn0261854	roo	Middle exon	4.33691	0.999998
Head	JUT-011	FBtr0303440	TRINITY_DN779_c1_g1_i11	FBtr0303440	FBgn0263354	roo	Last exon	6.03786	0.997605
Head	JUT-011	FBtr0303781	TRINITY_DN6699_c0_g1_i1	FBtr0303781	FBgn0036923	roo	Last exon	2.98172	1
Head	JUT-011	FBtr0303882	TRINITY_DN3905_c0_g1_i4	MSTRG.1216.3	FBgn0051755	Bari1	Last exon	2.0413	0.855016
Head	JUT-011	FBtr0304113	TRINITY_DN10_c5_g1_i7	FBtr0304113	FBgn0051716	INE-1	Last exon	0.55088	1
Head	JUT-011	FBtr0304697	TRINITY_DN821_c0_g1_i7	MSTRG.3701.1	FBgn0000662	roo	First exon	2.43914	0.994866
Head	JUT-011	FBtr0304975	TRINITY_DN7616_c0_g1_i4	FBtr0304975	FBgn0036534	roo	Last exon	50.2175	0.999985
Head	JUT-011	FBtr0305011	TRINITY_DN2999_c1_g1_i9	MSTRG.9477.1	FBgn0262562	roo	First exon	7.5033	1
Head	JUT-011	FBtr0305011	TRINITY_DN2999_c1_g1_i9	MSTRG.9477.1	FBgn0262562	roo	Middle exon	7.5033	1
Head	JUT-011	FBtr0305029	TRINITY_DN2513_c1_g1_i10	MSTRG.9710.7	FBgn0262582	roo	Middle exon	9.55432	1
Head	JUT-011	FBtr0305134	TRINITY_DN1070_c0_g2_i2	FBtr0305134	FBgn0004198	roo	Middle exon	4.68202	1
Head	JUT-011	FBtr0305503	TRINITY_DN3709_c0_g1_i21	FBtr0305503	FBgn0032955	INE-1	Last exon	22.7088	0.99979
Head	JUT-011	FBtr0306111	TRINITY_DN1946_c0_g1_i12	FBtr0306111	FBgn0016078	INE-1	Last exon	7.80415	0.995219
Head	JUT-011	FBtr0306151	TRINITY_DN176_c3_g1_i1	FBtr0306151	FBgn0063485	roo	Middle exon	42.9486	0.999994
Head	JUT-011	FBtr0306240	TRINITY_DN1076_c1_g1_i3	MSTRG.6402.1	FBgn0016081	roo	Middle exon	5.03472	1
Head	JUT-011	FBtr0306240	TRINITY_DN1076_c1_g1_i42	MSTRG.6402.2	FBgn0016081	roo	Middle exon	2.3968	1
Head	JUT-011	FBtr0306240	TRINITY_DN1076_c1_g1_i53	MSTRG.6402.11	FBgn0016081	roo	Middle exon	2.90656	1
Head	JUT-011	FBtr0306241	TRINITY_DN1076_c1_g1_i48	FBtr0306241	FBgn0016081	roo	First exon	9.78371	1
Head	JUT-011	FBtr0306242	TRINITY_DN1076_c1_g1_i51	FBtr0306242	FBgn0016081	roo	Middle exon	7.56073	1
Head	JUT-011	FBtr0306252	TRINITY_DN789_c0_g3_i3	FBtr0306252	FBgn0265298	roo	Last exon	38.5767	0.752277
Head	JUT-011	FBtr0306295	TRINITY_DN4702_c0_g1_i2	FBtr0306295	FBgn0262886	INE-1	Last exon	4.53345	0.00742347
Head	JUT-011	FBtr0306295	TRINITY_DN4702_c0_g1_i2	FBtr0306295	FBgn0262886	S-element	Last exon	4.53345	0.00742347
Head	JUT-011	FBtr0306296	TRINITY_DN4702_c0_g1_i12	FBtr0306296	FBgn0262886	INE-1	Last exon	3.74028	0.0136868
Head	JUT-011	FBtr0306296	TRINITY_DN4702_c0_g1_i12	FBtr0306296	FBgn0262886	S-element	Last exon	3.74028	0.0136868
Head	JUT-011	FBtr0306297	TRINITY_DN4702_c0_g1_i13	FBtr0306297	FBgn0262886	INE-1	Last exon	4.88025	0.0117418
Head	JUT-011	FBtr0306297	TRINITY_DN4702_c0_g1_i13	FBtr0306297	FBgn0262886	S-element	Last exon	4.88025	0.0117418
Head	JUT-011	FBtr0306333	TRINITY_DN222_c0_g1_i12	MSTRG.414.1	FBgn0085423	412	Last exon	10.7719	1
Head	JUT-011	FBtr0306592	TRINITY_DN7184_c0_g1_i6	FBtr0306592	FBgn0002121	INE-1	Last exon	10.6364	1
Head	JUT-011	FBtr0306592	TRINITY_DN7184_c0_g1_i6	FBtr0306592	FBgn0002121	Idefix	Last exon	10.6364	1
Head	JUT-011	FBtr0306716	TRINITY_DN2120_c1_g1_i1	FBtr0306716	FBgn0262965	1360	Last exon	20.286	0.00557791
Head	JUT-011	FBtr0308254	TRINITY_DN1_c3_g1_i3	FBtr0308254	FBgn0266557	roo	First exon	20.1215	1
Head	JUT-011	FBtr0309039	TRINITY_DN10068_c0_g1_i1	FBtr0305496	FBgn0262631	INE-1	Unique	9.94022	0.00353329
Head	JUT-011	FBtr0309205	TRINITY_DN473_c0_g1_i12	FBtr0309205	FBgn0013995	roo	First exon	0.713062	1
Head	JUT-011	FBtr0309205	TRINITY_DN473_c0_g1_i24	MSTRG.9789.16	FBgn0013995	roo	Middle exon	1.29683	1
Head	JUT-011	FBtr0309217	TRINITY_DN846_c2_g1_i1	FBtr0309217	FBgn0031060	INE-1	Last exon	32.8475	0.997212
Head	JUT-011	FBtr0309697	TRINITY_DN8_c4_g1_i2	MSTRG.1355.2	FBgn0263560	roo	First exon	64.1177	0.999986
Head	JUT-011	FBtr0309828	TRINITY_DN1781_c0_g1_i17	FBtr0309828	FBgn0031374	roo	Last exon	7.80387	1
Head	JUT-011	FBtr0309857	TRINITY_DN4447_c0_g1_i2	FBtr0113110	FBgn0086408	INE-1	Last exon	7.48463	1
Head	JUT-011	FBtr0310277	TRINITY_DN10_c4_g1_i9	FBtr0310277	FBgn0262160	roo	Middle exon	3.75123	1
Head	JUT-011	FBtr0310443	TRINITY_DN859_c1_g1_i1	FBtr0310443	FBgn0026878	roo	Last exon	53.1615	0.626351
Head	JUT-011	FBtr0329829	TRINITY_DN2494_c0_g1_i10	FBtr0329829	FBgn0250830	1360	Last exon	33.1423	0.999992
Head	JUT-011	FBtr0329963	TRINITY_DN4754_c0_g1_i3	FBtr0329963	FBgn0032796	roo	First exon	49.2423	1
Head	JUT-011	FBtr0330085	TRINITY_DN172_c5_g2_i2	FBtr0085220	FBgn0045862	roo	Last exon	59.179	1
Head	JUT-011	FBtr0331378	TRINITY_DN4742_c0_g1_i21	FBtr0081507	FBgn0032910	INE-1	Middle exon	2.17138	0.835662
Head	JUT-011	FBtr0331398	TRINITY_DN3233_c2_g1_i1	FBtr0331398	FBgn0037206	roo	Middle exon	16.8692	0.999343
Head	JUT-011	FBtr0331657	TRINITY_DN1854_c0_g1_i13	FBtr0331656	FBgn0032974	INE-1	Last exon	18.2242	0.999993
Head	JUT-011	FBtr0331678	TRINITY_DN2104_c2_g1_i19	FBtr0331678	FBgn0032935	INE-1	Middle exon	5.25728	0.99987
Head	JUT-011	FBtr0331780	TRINITY_DN4469_c0_g1_i11	FBtr0331780	FBgn0024804	gypsy10	Last exon	3.67659	0.92028
Head	JUT-011	FBtr0331967	TRINITY_DN3719_c0_g1_i2	FBtr0331967	FBgn0027507	INE-1	Middle exon	1.57342	0.997304
Head	JUT-011	FBtr0332519	TRINITY_DN5626_c0_g1_i2	FBtr0332519	FBgn0264438	297	Unique	1.06043	0.0259834
Head	JUT-011	FBtr0332539	TRINITY_DN4318_c1_g1_i1	FBtr0332539	FBgn0051475	roo	Middle exon	46.404	0.999164
Head	JUT-011	FBtr0332738	TRINITY_DN2643_c1_g3_i1	FBtr0332738	FBgn0035574	roo	First exon	40.7427	1
Head	JUT-011	FBtr0332851	TRINITY_DN458_c1_g1_i3	FBtr0332851	FBgn0017418	1360	Last exon	19.6979	0.999823
Head	JUT-011	FBtr0332978	TRINITY_DN6074_c0_g1_i24	FBtr0332978	FBgn0005427	INE-1	First exon	2.58146	0.999993
Head	JUT-011	FBtr0333134	TRINITY_DN1986_c0_g1_i2	MSTRG.5743.3	FBgn0035477	roo	Middle exon	40.4975	0.999998
[truncated: 2,572 more rows]
